# Supplementary material for: Association of genetic polymorphisms of CYP2E1, NAT2, GST and SLCO1B1 with the risk of anti-tuberculosis drug-induced liver injury: a systematic review and meta-analysis
Source: PubMed Central journal article supplement — BMJ Open. 2019 Aug 1;9(8):e027940. doi: 10.1136/bmjopen-2018-027940 (PMC6688699; doi:10.1136/bmjopen-2018-027940), 2019-08-01
Supplement: bmjopen-2018-027940.draft_revisions.pdf [file bmjopen-2018-027940.draft_revisions.pdf]

# BMJ Open

BMJ Open is committed to open peer review. As part of this commitment we make the peer review history of every article we publish publicly available.

When an article is published we post the peer reviewers' comments and the authors' responses online. We also post the versions of the paper that were used during peer review. These are the versions that the peer review comments apply to.

The versions of the paper that follow are the versions that were submitted during the peer review process. They are not the versions of record or the final published versions. They should not be cited or distributed as the published version of this manuscript.

BMJ Open is an open access journal and the full, final, typeset and author-corrected version of record of the manuscript is available on our site with no access controls, subscription charges or pay-per-view fees (<http://bmjopen.bmj.com>).

If you have any questions on BMJ Open's open peer review process please email [info.bmjopen@bmj.com](mailto:info.bmjopen@bmj.com)

# BMJ Open

## Association of genetic polymorphisms of CYP2E1, NAT2, GST, and SLCO1B1 with the risk of anti-tuberculosis drug-induced liver injury: a systematic review and meta-analysis

|                               |                                                                                                                                                                                                                     |
|-------------------------------|---------------------------------------------------------------------------------------------------------------------------------------------------------------------------------------------------------------------|
| Journal:                      | <i>BMJ Open</i>                                                                                                                                                                                                     |
| Manuscript ID                 | bmjopen-2018-027940                                                                                                                                                                                                 |
| Article Type:                 | Research                                                                                                                                                                                                            |
| Date Submitted by the Author: | 19-Nov-2018                                                                                                                                                                                                         |
| Complete List of Authors:     | Yang , Seungwon<br>Hwang, Se Jung<br>Park, Jung Yun<br>Lee , Jangik I.<br>Chung, Eun Kyoung; Kyung Hee University, College of Pharmacy, Department of Pharmacy; Kyung Hee University Hospital at Gangdong, Pharmacy |
| Keywords:                     | Anti-tuberculosis drug-induced liver injury, genetic polymorphisms, meta-analysis, drug-metabolizing enzyme, drug transporter                                                                                       |
|                               |                                                                                                                                                                                                                     |

SCHOLARONE™  
Manuscripts

1  
2  
3  
4 Original article  
5  
6  
7

8 **Association of genetic polymorphisms of *CYP2E1*, *NAT2*, *GST*, and**  
9 ***SLCO1B1* with the risk of anti-tuberculosis drug-induced liver**  
10 **injury: a systematic review and meta-analysis**  
11  
12  
13  
14  
15  
16  
17

18 Seungwon Yang<sup>1</sup>, Se Jung Hwang<sup>2</sup>, Jung Yun Park<sup>3</sup>, Jangik Ike Lee<sup>3,4\*</sup>, Eun Kyoung Chung<sup>2\*</sup>  
19

20 <sup>1</sup> Department of Pharmacy and Yonsei Institute of Pharmaceutical Science, College of Pharmacy,  
21 Yonsei University, Incheon 21983, Republic of Korea  
22  
23

24 <sup>2</sup> Department of Pharmacy, College of Pharmacy, Kyung Hee University, Seoul 02447, Republic  
25 of Korea  
26  
27  
28

29 <sup>3</sup> College of Pharmacy, Seoul National University, Seoul 08826, Republic of Korea  
30

31 <sup>4</sup> College of Pharmacy and Research Institute of Pharmaceutical Sciences, Seoul National  
32 University, Seoul 08826, Republic of Korea  
33  
34  
35  
36  
37  
38  
39

40 **Word counts:** 4362 words  
41  
42  
43  
44  
45  
46

47 **\*Corresponding authors**  
48  
49

50 Prof. Jangik I. Lee, PharmD, Ph.D.  
51

52 Department of Pharmacy, College of Pharmacy, Seoul National University  
53

54 103 Daehak-Ro, Jongno-Gu, Seoul 03080  
55  
56  
57  
58  
59  
60

1  
2  
3  
4 South Korea

5  
6 Tel: +82-2-3668-7474

7  
8 Fax: +82-2-3668-7475

9  
10 E-mail: [jangik.lee@snu.ac.kr](mailto:jangik.lee@snu.ac.kr)

11  
12  
13  
14  
15 Prof., Eun Kyoung Chung, PharmD, Ph.D.

16 Department of Pharmacy, College of Pharmacy, Kyung Hee University

17  
18 26 Kyungheedaero, Dongdaemun-gu, Seoul 02447

19  
20 South Korea

21  
22 Tel: +82-2-962-2122

23  
24 Fax: +82-2-961-9580

25  
26 E-mail: [cekchung@khu.ac.kr](mailto:cekchung@khu.ac.kr)

27  
28 \*Jangik I. Lee and Eun Kyoung Chung have equally contributed to this study.

29  
30  
31  
32  
33  
34  
35  
36 **Running head**

37  
38  
39 Genetics of anti-tuberculosis liver injury

## ABSTRACT

**Objectives** The objective of this study is to investigate the association between genetic polymorphisms of *NAT2*, *CYP2E1*, *GST*, and *SLCO1B1* and the risk of anti-tuberculosis drug-induced liver injury (ATDILI).

**Design** Systematic review and meta-analysis

**Methods** PubMed, Embase, Web of Science, and Cochrane Reviews databases were systematically searched for case-control or cohort studies evaluating the association between *NAT2*, *CYP2E1*, *GST*, or *SLCO1B1* polymorphisms and ATDILI risk. The strength of association was assessed for each gene using the pooled odds ratio (OR) with a 95 % confidence interval (CI) based on the fixed- or random-effects model. Heterogeneity test and subgroup analyses were performed to confirm the reliability and robustness of the results.

**Results** Fifty-three studies were included in this analysis (n = 26 for *CYP2E1*, n = 34 for *NAT2*, n = 19 for *GST*, n = 4 for *SLCO1B1*). The risk of ATDILI was significantly increased with the following genotypes: *CYP2E1 RsaI/PstI* c1/c1 (OR = 1.39; 95% CI 1.06-1.83), *NAT2* slow acetylator (OR = 3.11, 95% CI 2.53-3.82), and *GSTM1* null (OR = 1.33, 95% CI 1.09-1.62). No significant association with ATDILI was found for the genetic polymorphisms of *CYP2E1 DraI*, *GSTT1*, *SLCO1B1 338A>C*, and *SLCO1B1 521T>C* (P > 0.05).

### Conclusions

ATDILI is more likely to occur in tuberculosis patients with *NAT2* slow acetylator genotype, *CYP2E1 RsaI/PstI* c1/c1 genotype, and *GSTM1* null genotype. Close monitoring may be warranted for patients with these genotypes.

## Strengths and limitations of this study

- This is the first meta-analysis to evaluate the association between the risk of ATDILI and *SLCO1B1* in TB patients.
- We included most updated studies with the large sample sizes to better clarify the association of genetic polymorphisms with the risk of ATDILI.
- The effect of anti-tuberculosis drug dosages on the risk of ATDILI could not be accounted for in our study because this information was not available in the majority of included studies

## Introduction

Tuberculosis (TB) is a rampant infectious disease caused by *Mycobacterium tuberculosis*. It poses a major public health threat globally with approximately 1.5 million deaths and 9 million new cases in 2013<sup>1</sup>. The mainstay of first-line TB treatment is a 4-drug combination regimen of isoniazid (INH), rifampicin (RIF), pyrazinamide (PZA), and ethambutol (EMB) during the first 2 months, followed by INH and RIF for additional 4 months<sup>2,3</sup>. The currently recommended therapy for TB is highly effective, resulting in high cure rates if patients are adherent to therapy<sup>4</sup>. However, treatment adherence is often suboptimal in patients receiving the combination anti-TB therapy due to many adverse drug reactions, some of which are considered serious<sup>5</sup>. One of the common adverse drug reactions associated with anti-TB medications is anti-TB drug-induced liver injury (ATDILI) affecting 2-28% of TB patients<sup>6</sup>. ATDILI is primarily mild to moderate in severity; however, it is potentially serious and fatal, resulting in the treatment interruption and ultimately, treatment failure<sup>7,8</sup>. According to previous studies, common risk factors for the development of ATDILI include age, race, nutritional status, alcohol intake, cigarette smoking, and coinfection with HIV or hepatitis B or C virus<sup>7,9</sup>.

Recently, increasing evidence suggests an association between the risk of ATDILI and genetic polymorphisms of drug-metabolizing enzymes (DMEs) and drug transporters<sup>10,11</sup>. Reduced enzyme activity due to polymorphic genotypes of various DMEs including cytochrome P450 2E1 (CYP2E1), N-acetyltransferase 2 (NAT2), and glutathione S-transferase (GST) can result in the increased production and accumulation of toxic chemicals in the liver, leading to the development of ATDILI<sup>12</sup>. Previous meta-analyses indicated the association between the risk of ATDILI and the *NAT2* slow acetylator, *CYP2E1\*1A*, and *GSTM1 null* genotypes<sup>10,13</sup>. Since their

1  
2  
3  
4 publication, several case-control pharmacogenetic studies in TB patients were newly published  
5  
6 with conflicting results regarding the association between the risk of ATDILI and genetic  
7  
8 polymorphisms of various DMEs. Therefore, an updated meta-analysis has been warranted to  
9  
10 confirm the association between the ATDILI risk and genetic polymorphisms of DMEs. In  
11  
12 addition to DMEs, drug transporters have been emerging as a key determinant of the  
13  
14 pharmacokinetics and pharmacodynamics of a drug<sup>14</sup>. Among various drug transporters, organic  
15  
16 anion transporting polypeptide 1B1 (OATP1B1), encoded by *SLCO1B1*, is the major influx  
17  
18 transporter responsible for hepatic uptake of RIF<sup>15</sup>. Although several studies have previously  
19  
20 examined the association between *SLCO1B1* polymorphisms and the risk of ATDILI, conflicting  
21  
22 results have been reported regarding the effect of *SLCO1B1* polymorphisms on ATDILI risk.  
23  
24  
25

26  
27 In our preliminary literature search, several polymorphic genes, including many DMEs,  
28  
29 transporters, and other genes such as those involved in the immune system, were identified to  
30  
31 have an association with the risk of ATDILI. Among these, sufficient, published information was  
32  
33 available to conduct meta-analyses for *CYP2E1*, *NAT2*, *GST*, and *SLCO1B1* genetic  
34  
35 polymorphisms.  
36  
37  
38  
39

## 40 Objectives

41  
42 This meta-analysis was to evaluate the association between the risk of ATDILI and genetic  
43  
44 polymorphisms of *CYP2E1*, *NAT2*, *GST*, and *SLCO1B1* in TB patients.  
45  
46  
47  
48  
49

## 50 Methods

51  
52 This study was in compliance with the Preferred Reporting Items for Systematic Reviews and  
53  
54 Meta-Analyses (PRISMA) checklist for reporting the study design, search strategy, methods,  
55  
56  
57  
58  
59



1  
2  
3  
4 results, and conclusions. Three authors (SY, JP, and SH) independently conducted a literature  
5  
6 search, study selection, quality assessment, and data extraction by reviewing the titles, abstracts,  
7  
8 and full texts based on the pre-specified study selection criteria. Any discrepancies were  
9  
10 adjudicated by corresponding authors (JIL and EKC).  
11  
12

## 13 **Search strategy**

14  
15  
16 Electronic databases of PubMed, EMBASE, Web of Science, and Cochrane Reviews were  
17  
18 systematically searched from their inception to February 2018 to identify relevant studies  
19  
20 evaluating the association of *NAT2*, *CYP2E1*, *GST*, and *SLCO1B1* polymorphisms with ATDILI  
21  
22 risk. A comprehensive literature search was conducted using a combination of the following  
23  
24 keywords and Medical Subject Heading (MeSH) terms: (“genetic polymorphism” or “*NAT2*” or  
25  
26 “*CYP2E1*” or “*GST*” or “*SLCO1B1*” or “drug-metabolizing enzymes” or “drug transporter”)  
27  
28 AND (“anti-tuberculosis agents drug-induced liver injuries” or “hepatotoxicity”). The reference  
29  
30 lists in the selected reviews and meta-analyses were reviewed to ensure the inclusion of all  
31  
32 relevant evidence in this analysis.  
33  
34  
35  
36  
37

## 38 **Study selection**

39  
40  
41 The types of studies included in the analysis were case-control or cohort studies evaluating the  
42  
43 association between the risk of ATDILI and genetic polymorphisms of *NAT2*, *CYP2E1*, *GST*,  
44  
45 and *SLCO1B1* in TB patients. Excluded studies were as follows: (1) studies available only in the  
46  
47 form of abstracts or meeting posters; (2) review or meta-analysis articles; (3) studies providing  
48  
49 insufficient data to estimate odds ratios (OR) and their 95% confidence intervals (CI); (4) studies  
50  
51 in non-English language; (5) non-human studies including animal and *in vitro* studies; (6) studies  
52  
53 with unpublished data; and (7) studies providing insufficient information on genotyping  
54  
55  
56  
57  
58  
59  
60

1  
2  
3  
4 methods.  
5  
6  
7

## 8 **Quality assessment and data extraction**

9

10 The quality of included studies was assessed using the revised Little's recommendation based on  
11 the following criteria<sup>16 17</sup>. (1) scientific design; (2) definite inclusion of study population; (3)  
12 explicit information on study population; (4) explicit diagnostic criteria of ATDILI; (5) genetic  
13 detection method; (6) appropriate statistical analysis; and (7) logical discussion of study bias.  
14  
15

16 Studies with an overall score of  $\geq 4$  (range 0 to 7) were considered high quality and retained in  
17 the analysis. The following data were extracted from each study using a standardized extraction  
18 form: (1) name of the first author; (2) year of publication; (3) the polymorphic gene(s) and  
19 genotype(s) under investigation; (4) ethnicity; (5) sample size; (6) mean or median age; (7) sex  
20 distribution; (8) anti-TB drug regimens; (9) diagnostic criteria of ATDILI; (10) genotyping  
21 methods; (11) Hardy-Weinberg equilibrium (HWE) test results; and (12) the number of cases  
22 and controls for each polymorphic genotype.  
23  
24  
25  
26  
27  
28  
29  
30  
31  
32  
33  
34  
35

## 36 **Statistical analysis**

37

38 The genotypes were analyzed based on the following genetic risk model: (1) *NAT2* (slow  
39 acetylator vs. intermediate and fast acetylator); (2) *CYP2E1* (c1/c1 vs. c1/c2 and c2/c2 for the  
40 *RsaI/PstI* polymorphism, D/D vs. D/C and C/C for the *DraI* polymorphism); (3) *GSTMI* (null vs.  
41 non-null); (4) *GSTTI* (null vs. non-null); (5) *GSTMI/GSTTI* (dual-null vs. one- or non-null); and  
42 (6) *SLCO1B1* (AA vs. AG and GG for 388A>G polymorphism, CC vs. TC and TT for 521T>C  
43 polymorphism) Fixed- or random-effects models were used depending on the presence of  
44 heterogeneity. The random-effects model was used in the presence of significant heterogeneity;  
45  
46  
47  
48  
49  
50  
51  
52  
53  
54  
55  
56

1  
2  
3  
4 otherwise, the fixed effects model was used. Heterogeneity of study outcomes among included  
5 studies was evaluated using Cochran's Q test ( $Q$ ) and quantified using Higgin's  $I^2$  test.  
6  
7 Significant heterogeneity was defined as the  $I^2$  score of  $> 40\%$  accompanied by  $P < 0.10$  from  
8 the Cochran's Q test <sup>18</sup>. The strength of the association between the genetic polymorphisms and  
9 the risk of ATDILI was estimated using pooled ORs with the corresponding 95% CIs. The  
10 statistical significance of an OR was defined as  $P < 0.05$  from the Z test. Subgroup analyses were  
11 performed to identify the source of heterogeneity and to investigate effects of the following  
12 covariates on the overall strength of the association between the genetic polymorphisms and the  
13 risk of ATDILI: ethnicity, the achievement of HWE, anti-TB drug regimen, the genotyping  
14 method used, and diagnostic criteria of ATDILI. In addition, sensitivity analyses were conducted  
15 to assess the robustness of the results. Publication bias was evaluated with a symmetrical funnel  
16 plot. Statistical analyses were performed using Review Manager Software (Cochrane  
17 Collaboration, London, UK).

## 34 Patient and public involvement

35 Patients and public were not involved in the design of this study.  
36  
37  
38  
39  
40  
41

## 42 Results

### 43 Study selection and characteristics

44  
45 Overall, 384 articles were identified through electronic database search ( $n = 381$ ) and through  
46 manual search by reviewing the reference lists of retrieved articles ( $n = 3$ ). After removing 99  
47 duplicates, 285 articles were screened for relevance based on the title and abstract. Among them,  
48 70 relevant articles were assessed for eligibility through full-text evaluations. Finally, a total of  
49  
50  
51  
52  
53  
54  
55  
56

53 articles which met the inclusion criteria were included in our analysis (Figure 1). Among the 53 studies, 26 studies were included for *CYP2E1*, 34 studies for *NAT2*, 19 studies for *GST* (19 for *GSTMI*, 17 for *GSTT1*, and 11 for *GSTMI/GSTT1*), and 4 studies for *SLCO1B1*.

Table 1 summarizes the characteristics of the included studies. Across the included studies, large variability in study population was observed in terms of ethnicity (Chinese, Japanese, Korean, Indian, Taiwanese, Brazilian, Caucasian, Iranian, Tunisian, and Turkish), age (mean or median age ranging from 27 to 70 years), and sex (the proportion of males ranging from 13% to 90%). Patients in our included studies received either monotherapy with INH or RIF or a combination therapy including a 4-drug regimen of INH, RIF, PZA, and EMB for the treatment of TB. ATDILI was defined as an elevated serum alanine aminotransferase (ALT) concentration by 1.5- to 5-fold or greater above the upper limit of normal (ULN) depending on the study. The quality score of the included studies was 5 or greater based on the revised Little's recommendation (Table 1)<sup>16 17</sup>. Genotype distribution, the achievement of HWE, and the genotyping method used in the included studies are summarized for each polymorphic gene in S1 to S4 Tables. Funnel plots for *CYP2E1*, *NAT2*, *GST*, and *SLCO1B1* are provided in S5 Figure. None of the funnel plots were substantially asymmetrical.

## ***CYP2E1***

For the *CYP2E1 RsaI/PstI* polymorphism, 24 studies with 1293 cases and 5450 controls were included in our primary analysis. Using the random-effects model, the pooled estimates of all included studies (n = 24) showed a significant association between the risk of ATDILI and the *CYP2E1 RsaI/PstI* polymorphism (OR for the c1/c1 genotype = 1.39; 95% CI 1.06–1.83, P = 0.02; I<sup>2</sup> = 60%, P<sub>heterogeneity</sub> < 0.0001) (Figure 2A). In the subgroup analysis based on ethnicity,

1  
2  
3  
4 anti-TB drug regimens, and diagnostic criteria of ATDILI, the risk of ATDILI was significantly  
5 increased for the *CYP2E1 RsaI/PstI* c1/c1 genotype in East Asian patients (OR = 1.62, 95% CI  
6 1.26-2.36, P = 0.01; I<sup>2</sup> = 69%, P<sub>heterogeneity</sub> = 0.0006), in patients receiving a combination of anti-  
7 TB medications (OR = 1.35, 95% CI 1.01-1.79, P < 0.00001; I<sup>2</sup> = 61%, P<sub>heterogeneity</sub> = 0.0002), and  
8 in patients with ATDILI defined as a serum ALT concentration elevated by 2-fold or greater  
9 above the ULN (OR = 1.54, 95% CI 1.08-2.18, P = 0.02; I<sup>2</sup> = 70%, P<sub>heterogeneity</sub> < 0.0001) (S6  
10 Table). The association between the risk of ATDILI and the c1/c1 genotype remained significant  
11 after excluding the studies where HWE was not achieved (OR = 1.67, 95% CI 1.19-2.34, P =  
12 0.002; I<sup>2</sup> = 58%, P<sub>heterogeneity</sub> = 0.004) (S6 Table).

13  
14 In our primary analysis for the *CYP2E1 DraI* polymorphism with six studies including  
15 233 cases and 1272 controls, no significant association was observed using the fixed-effects  
16 model between the risk of ATDILI and the *DraI* polymorphism (OR for the D/D genotype =  
17 0.93, 95% CI 0.68-1.27, P = 0.64; I<sup>2</sup> = 0%, P<sub>heterogeneity</sub> = 0.51) (Figure 2B). No subgroup analysis  
18 for the *DraI* polymorphism resulted in a significant association between the ATDILI risk and the  
19 *DraI* polymorphism (S6 Table).

## 20 ***NAT2***

21 Overall, 34 studies with 1270 cases and 7234 controls were included in our primary analysis for  
22 the *NAT2* polymorphism. Using the random-effects model, the pooled estimates of all included  
23 studies (n = 34) showed a significant association between the risk of ATDILI and the *NAT2*  
24 polymorphism (OR for the slow acetylator genotype = 3.11, 95% CI 2.53-3.82, P < 0.00001; I<sup>2</sup> =  
25 47%, P<sub>heterogeneity</sub> = 0.002) (Figure 3).

26 In the subgroup analysis based on ethnicity, anti-tuberculosis drug regimens, and

1  
2  
3  
4 diagnostic criteria of ATDILI, the risk of ATDILI was significantly increased in slow acetylators  
5  
6 compared to fast or intermediate acetylators in all subgroups (S7 Table). Additionally, the  
7  
8 association between the risk of ATDILI and the *NAT2* slow acetylator genotype remained  
9  
10 significant after excluding the studies where HWE was not achieved (S7 Table). Similarly, slow  
11  
12 acetylators were at the significantly increased risk of ATDILI regardless of the genotyping  
13  
14 method used (e.g., polymerase chain reaction-restriction fragment length polymorphism [PCR-  
15  
16 RFLP], sequencing) (S7 Table).

## 21 ***GST***

22  
23  
24 For the *GSTM1* polymorphism, a total of 19 studies with 977 cases and 5119 controls were  
25  
26 included in our primary analysis. Using the fixed-effects model, the pooled estimates of all  
27  
28 included studies (n = 19) showed a significant association between the risk of ATDILI and the  
29  
30 *GSTM1* polymorphism (OR for the *GSTM1* null genotype = 1.30, 95% CI 1.12-1.52, P = 0.0007;  
31  
32  $I^2 = 33\%$ ,  $P_{heterogeneity} = 0.08$ ) (Figure 4A). In the subgroup analysis based on ethnicity and  
33  
34 diagnostic criteria of ATDILI, the risk of ATDILI was significantly increased for the *GSTM1*  
35  
36 null genotype in Indians (OR = 1.68, 95% CI 1.30-2.19, P < 0.0001;  $I^2 = 36\%$ ,  $P_{heterogeneity} = 0.15$ )  
37  
38 and in patients with ATDILI defined as a serum ALT concentration elevated by 2-fold or greater  
39  
40 above the ULN (OR = 1.56, 95% CI 1.28-1.91, P < 0.0001;  $I^2 = 13\%$ ,  $P_{heterogeneity} = 0.32$ ) (S8  
41  
42 Table).

43  
44  
45 For the *GSTT1* and *GSTM1/GSTT1* polymorphisms, 17 studies (768 cases, 4823 controls)  
46  
47 and 11 studies (547 cases, 4233 controls) were included in our primary analyses, respectively.  
48  
49 The risk of ATDILI was not significantly associated with the *GSTT1* polymorphism (OR for the  
50  
51 null genotype = 1.03, 95% CI 0.85-1.25, P = 0.76;  $I^2 = 16\%$ ,  $P_{heterogeneity} = 0.26$ ) or the  
52  
53  
54  
55  
56

1  
2  
3  
4 *GSTM1/GSTT1* polymorphism (OR for the dual-null genotype = 1.05, 95% CI 0.67-1.62, P =  
5  
6 0.84;  $I^2 = 59\%$ ,  $P_{heterogeneity} = 0.006$ ) (Figures 4B and 4C). The associations of the *GSTT1* and the  
7  
8 *GSTM1/GSTT1* genetic polymorphisms with the risk of ATDILI were not significant in any of  
9  
10 the subgroups tested (S8 Table).

## 11 ***SLCO1B1***

12  
13  
14 For the *SLCO1B1 388A>G* polymorphism, four studies with 279 cases and 837 controls were  
15  
16 included in our primary analysis. Using the fixed-effects model, no significant association was  
17  
18 observed between the risk of ATDILI and the *SLCO1B1 388A>G* polymorphism (OR for the AA  
19  
20 genotype = 1.47, 95% CI 0.94-2.29, P = 0.09;  $I^2 = 0\%$ ,  $P_{heterogeneity} = 0.72$ ) (Figure 5A). For the  
21  
22 *SLCO1B1 521T>C* polymorphism, four studies with 310 cases and 901 controls were included in  
23  
24 our primary analysis. Using the fixed-effects model, no significant association was found  
25  
26 between the ATDILI risk and the *SLCO1B1 521T>C* polymorphism (OR for the CC genotype =  
27  
28 1.21, 95% CI 0.40-3.63, P = 0.74;  $I^2 = 0\%$ ,  $P_{heterogeneity} = 0.56$ ) (Figure 5B). No significant  
29  
30 association was observed between the risk of ATDILI and the *SLCO1B1* polymorphisms (both  
31  
32 388A>G and 521T>C) in any of the tested subgroups based on ethnicity, anti-TB drug regimen,  
33  
34 diagnostic criteria of ATDILI, and the genotyping method used (S9 Table).  
35  
36  
37  
38  
39  
40  
41  
42  
43

## 44 **Discussion**

45  
46  
47 To our knowledge, our current study is a large-scale meta-analysis evaluating the association  
48  
49 between the risk of ATDILI and genetic polymorphisms of *SLCO1B1* as well as various DMEs  
50  
51 including *CYP2E1*, *NAT2*, and *GST* to provide more updated, comprehensive, and compelling  
52  
53 evidence. Compared with previous meta-analyses, our present study included a larger number  
54  
55  
56  
57  
58  
59  
60

1  
2  
3  
4 of studies and explored various factors which may influence the association between genetic  
5 polymorphisms and the risk of ATDILI (S6, S7, S8, S9 Tables). The inclusion of a large  
6  
7 number of studies in our current meta-analysis may sufficiently increase the statistical power  
8  
9 compared to individual studies; however, a limited number of studies evaluating the association  
10  
11 between the risk of ATDILI and the *SLCO1B1* genetic polymorphisms were included (n = 4).  
12  
13 Consistent with previous studies, our current study suggested a significantly increased risk of  
14  
15 ATDILI in patients with the *NAT2* slow acetylator genotype (OR = 3.11, 95% CI 2.53-3.82), the  
16  
17 *CYP2E1 RsaI/PstI* c1/c1 genotype (OR = 1.39, 95% CI 1.06-1.83), and the *GSTM1* null  
18  
19 genotype (OR = 1.30, 95% CI 1.12-1.52)<sup>10 13 19</sup>. Among these genotypes, the risk of ATDILI  
20  
21 was increased the most in patients with the *NAT2* slow acetylator genotype. In contrast, no  
22  
23 significant association was observed between the risk of ATDILI and the genetic  
24  
25 polymorphisms of *CYP2E1 DraI*, *GSTT1*, *GSTM1/GSTT1*, *SLCO1B1 388A>G*, and *SLCO1B1*  
26  
27 *521T>C*. Caution needs to be exercised when interpreting this study finding because the lack of  
28  
29 significant association between these polymorphisms and the risk of ATDILI might result from  
30  
31 small sample sizes and the low frequency of ATDILI reported in patients with these genetic  
32  
33 polymorphisms.  
34  
35  
36  
37  
38  
39  
40

41 When evaluating the impacts of the *CYP2E1 RsaI/PstI* and *DraI* genetic polymorphisms  
42  
43 on the risk of ATDILI in our study, patients with the *RsaI/PstI* c1/c1 genotype were 1.39-times  
44  
45 more likely to develop ATDILI. Similarly, in a previous meta-analysis by Deng and colleagues,  
46  
47 the risk of ATDILI was 1.4-times higher in patients with the *RsaI/PstI* c1/c1 genotype compared  
48  
49 to other genotypes<sup>20</sup>. In the liver, INH is metabolized by NAT2 to acetylisoniazid which is  
50  
51 consequently oxidized by CYP2E1 to reactive intermediates in the formation of hepatotoxins<sup>21</sup>  
52  
53  
54  
55<sup>22</sup>. The increased inducibility or greater activity of CYP2E1 in patients with the *CYP2E1*  
56  
57  
58  
59  
60



1  
2  
3  
4 *RsaI/PstI* c1/c1 genotype may result in the production of more intermediate hepatotoxins,  
5  
6 ultimately leading to the increased risk of ATDILI <sup>21 22</sup>. Our subgroup analysis showed a  
7  
8 significantly increased risk of ATDILI in the *CYP2E1 RsaI/PstI* c1/c1 genotype carriers of East  
9  
10 Asian and Indian ethnicity (S6 Table), suggesting a potential gene-ethnicity interaction in these  
11  
12 ethnic populations due to genetic characteristics of the ethnicity or environmental factors in these  
13  
14 populations <sup>23</sup>. In addition to ethnicity, combination anti-TB therapy was shown to significantly  
15  
16 increase the risk of ATDILI in patients with the *CYP2E1 RsaI/PstI* c1/c1 genotype (S6 Table).  
17  
18 This is consistent with previous study findings because hepatotoxicity commonly occurs with  
19  
20 anti-TB drugs and thus, use of more than one hepatotoxic anti-TB medications increases the risk  
21  
22 of ATDILI <sup>7</sup>. Moreover, patients with the *CYP2E1 RsaI/PstI* c1/c1 genotype were at a  
23  
24 significantly increased risk of ATDILI when ATDILI was defined as serum ALT concentrations  
25  
26 elevated > 2 times the ULN and when their genotype was determined by the PCR-RFLP or  
27  
28 sequencing method. This may suggest more sensitive diagnostic criteria and genotyping method  
29  
30 to identify patients at an increased risk of ATDILI as early in therapy as possible. However,  
31  
32 caution needs to be exercised when applying this study finding in practice because of the  
33  
34 potentially low specificity associated with the diagnostic criteria of ATDILI and genotyping  
35  
36 method. Future studies are warranted to confirm our subgroup analysis results.  
37  
38  
39  
40  
41  
42

43  
44 Similar to previous studies, our current study suggested a significantly increased risk of  
45  
46 ATDILI in patients with the *NAT2* slow acetylator genotype compared to those with  
47  
48 intermediate/fast acetylator genotypes <sup>10 19</sup>. The risk of ATDILI in slow acetylators remained  
49  
50 significantly increased in all tested subgroups regardless of ethnicity, the anti-TB drug regimen  
51  
52 used, the achievement of HWE, diagnostic criteria of ATDILI, and the genotyping method used  
53  
54 (S7 Table). Among the subgroups, the ATDILI risk appeared the highest in the West Asian  
55  
56

1  
2  
3  
4 population (OR = 9.51, 95% CI 4.19-21.61, P < 0.00001). However, caution needs to be  
5  
6 exercised when interpreting and applying this finding in practice because it is the result of  
7  
8 subgroup analysis. Until more confirmative data are available, clinicians may closely monitor  
9  
10 West Asian TB patients with the *NAT2* slow acetylator genotype receiving INH-based treatment.  
11  
12

13 According to previous studies, GST enzymes, particularly those coded by *GSTM1* and  
14  
15 *GSTT1* loci, are associated with the risk of drug-induced hepatotoxicity<sup>10 24</sup>. Consistent with  
16  
17 previous studies, our current study demonstrated a significantly increased risk of ATDILI in  
18  
19 individuals with the *GSTM1* null genotype compared to those with the non-null genotype;  
20  
21 however, the risk of ATDILI was not affected by the *GSTT1* or *GSTM1/GSTT1* genetic  
22  
23 polymorphisms. GSTs are important enzymes to detoxify various xenobiotics and play an  
24  
25 essential role in INH metabolism by eliminating acetyldiazene ketene acetylonium ion (a  
26  
27 possibly hepatotoxic free radical metabolite of INH) from the body through *GSTM1*. This may  
28  
29 account for the significant association of the ATDILI risk with the *GSTM1* genotype, but not  
30  
31 with the *GSTT1* or *GSTM1/GSTT1* genotypes<sup>10 24</sup>. Our subgroup analysis showed a significantly  
32  
33 increased risk of ATDILI in the *GSTM1* null genotype carriers of Indian ethnicity (S8 Table),  
34  
35 suggesting a potential gene-ethnicity interaction due to unknown genetic characteristics or  
36  
37 environmental factors such as diet in Indian patients<sup>23</sup>. In addition, the risk of ATDILI was  
38  
39 significantly increased in patients with the *GSTM1* null genotype when ATDILI was defined as  
40  
41 serum ALT concentrations elevated > 2 times the ULN (S8 Table). Based on this finding, serum  
42  
43 ALT concentrations elevated > 2 times the ULN may be suggested as more sensitive diagnostic  
44  
45 criteria of ATDILI; however, it may result in the false positive identification of ATDILI patients  
46  
47 without clinical significance due to potentially low specificity. Considering this is a subgroup  
48  
49 analysis result, caution is warranted in interpreting and applying this finding in practice until  
50  
51  
52  
53  
54  
55  
56  
57  
58  
59  
60

confirmative data are available in the future.

*SLCO1B1* encodes organic anion transporting polypeptide 1B1 (OATP1B1) which is a major influx drug transporter responsible for the hepatic uptake of various endogenous and exogenous substances including RIF<sup>25</sup>. Previous studies showed significantly altered systemic exposure of RIF in carriers of the *SLCO1B1* polymorphism<sup>26 27</sup>. To our knowledge, only four studies have been conducted to examine the association between the ATDILI risk and the *SLCO1B1* genetic polymorphisms<sup>11 25 28 29</sup>. Various single nucleotide polymorphisms (SNPs) of *SLCO1B1* were evaluated in these studies; however, *SLCO1B1* 388A>G (rs2306283) and 521T>C (rs4149056) were the only polymorphisms assessed in common<sup>11 25 28 29</sup>. Therefore, to maximize the sample size in our current meta-analysis, we examined the association between the risk of ATDILI and the polymorphic genotypes of *SLCO1B1* 388A>G and 521 T>C. Similar to each of the included studies, we did not find a significantly altered risk of ATDILI in patients with the *SLCO1B1* 388A>G and 521T>C genetic polymorphisms. However, caution should be exercised when interpreting and applying our study findings in practice due to the limited genetic risk model evaluated and a small sample size for the association between the ATDILI risk and the *SLCO1B1* genetic polymorphisms.

In our study, significantly high heterogeneity between studies was observed for *CYP2E1* *RsaI/PstI* ( $I^2 = 60\%$ ,  $P < 0.0001$ ), *NAT2* ( $I^2 = 47\%$ ,  $P = 0.002$ ), and *GSTM1/GSTT1* ( $I^2 = 59\%$ ,  $P = 0.006$ ). The high heterogeneity between studies may be due to substantial differences in ethnicity, the achievement of HWE, anti-TB drug regimen, the genotyping method used, and diagnostic criteria of ATDILI among the studies included in our analysis. To address the relatively high heterogeneity, we performed sensitivity analyses using the leave-one-out method by deleting one study after each analysis followed by repeating the meta-analysis. Through the

1  
2  
3  
4 sensitivity analyses, outlier studies were identified as the major source of heterogeneity. After  
5  
6 removing these outlier studies, heterogeneity was remarkably reduced ( $I^2 = 60\%$  to  $34\%$  for  
7  
8 *CYP2E1 RsaI/PstI*,  $I^2 = 47\%$  to  $32\%$  for *NAT2*,  $I^2 = 33\%$  to  $0\%$  for *GSTMI*,  $I^2 = 59\%$  to  $0\%$  for  
9  
10 *GSTMI/GSTT1*). The overall results for the association between the risk of ATDILI and genetic  
11  
12 polymorphisms of these enzymes after excluding the outlier studies were not changed, indicating  
13  
14 the robustness of our analysis result.  
15  
16

17  
18 There are limitations to this study. First, due to the lack of information regarding other  
19  
20 patient characteristics potentially associated with liver injuries, our estimated ORs were not  
21  
22 adjusted based on the potential risk factor of drug-induced liver injuries such as age, alcohol  
23  
24 consumption, cigarette smoking, and other lifestyle characteristics<sup>79</sup>. Second, our literature  
25  
26 search limited to the articles published in English may lead to language bias. Third, the effect of  
27  
28 anti-tuberculosis drug dosages on the risk of ATDILI could not be accounted for in our study  
29  
30 because this information was not available in most of the included studies. In addition, a specific  
31  
32 causative agent of ATDILI could not be identified in our analysis because most patients in our  
33  
34 included studies received a combination regimen of anti-tuberculosis drugs. Lastly, only the  
35  
36 limited number of genotypes were assessed for the association with the risk of ATDILI,  
37  
38 particularly for *SLCO1B1* genetic polymorphisms. Future studies are needed to comprehensively  
39  
40 and adequately address the relationship between the ATDILI risk and various polymorphisms of  
41  
42 the genes for drug-metabolizing enzymes and drug transporters by using different genetic risk  
43  
44 models and including more polymorphic genotypes.  
45  
46  
47  
48  
49

50  
51 In conclusion, the risk of ATDILI during TB therapy was significantly increased in TB  
52  
53 patients carrying *NAT2* slow acetylator, *CYP2E1 RsaI/PstI* c1/c1, or *GSTMI* null genotype.  
54  
55 Screening for these genetic polymorphisms, particularly for the *NAT2* slow acetylator genotype,  
56  
57

1  
2  
3  
4 may be of great clinical benefit to identify patients at high risk for ATDILI and minimize the risk  
5  
6 of ATDILI. Future studies are pertinent to develop dose and/or treatment adjustment strategies,  
7  
8 to evaluate the feasibility and cost-effectiveness of the genetic screening test, and to assess the  
9  
10 effect of more genetic polymorphisms on the risk of ATDILI for appropriate prevention and  
11  
12 management of ATDILI.  
13  
14  
15  
16  
17  
18  
19

## 20 **Acknowledgments**

21  
22  
23 This study was supported by Research Resettlement Fund for the new faculty of Seoul National  
24  
25 University.  
26  
27  
28  
29  
30

## 31 **Contributors**

32  
33  
34 S.Y. devised and designed the study. S.Y., J.Y.P., and S.J.H. conducted the literature search,  
35  
36 performed data extraction and analysis, and interpreted the data. S.Y., E.K.C., and J.I.L.  
37  
38 prepared and reviewed the manuscript. All authors reviewed, amended and approved the  
39  
40 submitted manuscript  
41  
42  
43  
44  
45  
46  
47

## 48 **Funding**

49  
50  
51 Research Resettlement Fund for the new faculty of Seoul National University provided funding  
52  
53 to Jangik I. Lee and the funder had no role in data collection, data analysis, translation, and  
54  
55 drafting of the manuscript  
56  
57  
58  
59  
60

## Competing interests

None declared

## Patient consent

Not required

## Provenance and peer review

Not commissioned, externally peer reviewed

## Data sharing statement

No additional unpublished data are available

## References

1. WHO. Global tuberculosis report Geneva, Switzerland: WHO, 2014.
2. WHO. Treatment of tuberculosis guidelines, 4th edition. Geneva, Switzerland: WHO, 2010.
3. Blumberg H, Burman W, Chaisson R, *et al.* American Thoracic Society/Centers for Disease Control and Prevention/Infectious Diseases Society of America: treatment of tuberculosis. *Am J Respir Crit Care Med* 2003;167:603.
4. Zumla A, Raviglione M, Hafner R, *et al.* Tuberculosis. *N Engl J Med* 2013;368:745-55.
5. Lange C, Abubakar I, Alffenaar J-WC, *et al.* Management of patients with multidrug-resistant/extensively drug-resistant tuberculosis in Europe: a TBNET consensus statement. *Eur Respir J* 2014;44:23-63.
6. Tostmann A, Boeree MJ, Aarnoutse RE, *et al.* Antituberculosis drug-induced hepatotoxicity: concise up-to-date review. *J Gastroenterol Hepatol* 2008;23:192-202.
7. Saukkonen JJ, Cohn DL, Jasmer RM, *et al.* An official ATS statement: hepatotoxicity of antituberculosis therapy. *Am J Respir Crit Care Med* 2006;174:935-52.
8. Yee D, Valiquette C, Pelletier M, *et al.* Incidence of serious side effects from first-line antituberculosis drugs among patients treated for active tuberculosis. *Am J Respir Crit Care Med* 2003;167:1472-7.
9. Chen R, Wang J, Zhang Y, *et al.* Key factors of susceptibility to anti-tuberculosis drug-induced hepatotoxicity. *Arch Toxicol* 2015;89:883-97.
10. Cai Y, Yi J, Zhou C, *et al.* Pharmacogenetic Study of Drug-Metabolising Enzyme Polymorphisms on the Risk of Anti-Tuberculosis Drug-Induced Liver Injury: A Meta-Analysis. *PLoS ONE* 2012;7.
11. Kim SH, Kim SH, Lee JH, *et al.* Polymorphisms in drug transporter genes (ABCB1, SLCO1B1 and ABCC2) and hepatitis induced by antituberculosis drugs. *Tuberculosis* 2012;92:100-4.
12. Roy PD, Majumder M, Roy B. Pharmacogenomics of anti-TB drugs-related hepatotoxicity. *Pharmacogenomics* 2008;9:311-21.
13. Sun F, Chen Y, Xiang Y, *et al.* Drug-metabolising enzyme polymorphisms and predisposition to anti-tuberculosis drug-induced liver injury: a meta-analysis. *Int J Tuberc*

- 1  
2  
3  
4 *Lung Dis* 2008;12:994-1002.
- 5
- 6 14. Kerb R. Implications of genetic polymorphisms in drug transporters for pharmacotherapy.
- 7 *Cancer Lett* 2006;234:4-33.
- 8
- 9 15. Cui Y, Konig J, Leier I, *et al.* Hepatic uptake of bilirubin and its conjugates by the human
- 10 organic anion transporter SLC21A6. *J Biol Chem* 2001;276:9626-30.
- 11
- 12 16. Little J, Bradley L, Bray MS, *et al.* Reporting, appraising, and integrating data on genotype
- 13 prevalence and gene-disease associations. *American journal of epidemiology*
- 14 2002;156:300-10.
- 15
- 16 17. Tang N, Deng R, Wang Y, *et al.* GSTM1 and GSTT1 null polymorphisms and
- 17 susceptibility to anti-tuberculosis drug-induced liver injury: a meta-analysis. *Int J Tuberc*
- 18 *Lung Dis* 2013;17:17-25.
- 19
- 20 18. Higgins JP, Thompson SG. Quantifying heterogeneity in a meta-analysis. *Statistics in*
- 21 *medicine* 2002;21:1539-58.
- 22
- 23 19. Wang PY, Xie SY, Hao Q, *et al.* NAT2 polymorphisms and susceptibility to anti-
- 24 tuberculosis drug-induced liver injury: a meta-analysis. *Int J Tuberc Lung Dis*
- 25 2012;16:589-95.
- 26
- 27 20. Deng R, Yang T, Wang Y, *et al.* CYP2E1 RsaI/PstI polymorphism and risk of anti-
- 28 tuberculosis drug-induced liver injury: a meta-analysis. *Int J Tuberc Lung Dis*
- 29 2012;16:1574-81.
- 30
- 31 21. Mitchell JR, Zimmerman HJ, Ishak KG, *et al.* Isoniazid liver injury: clinical spectrum,
- 32 pathology, and probable pathogenesis. *Ann Intern Med* 1976;84:181-92.
- 33
- 34 22. Ryan D, Ramanathan L, Iida S, *et al.* Characterization of a major form of rat hepatic
- 35 microsomal cytochrome P-450 induced by isoniazid. *Journal of Biological Chemistry*
- 36 1985;260:6385-93.
- 37
- 38 23. Ortega VE, Meyers DA. Pharmacogenetics: implications of race and ethnicity on defining
- 39 genetic profiles for personalized medicine. *J Allergy Clin Immunol* 2014;133:16-26.
- 40
- 41 24. Ramachandran G, Swaminathan S. Role of pharmacogenomics in the treatment of
- 42 tuberculosis: a review. *Pharmgenomics Pers Med* 2012;5:89-98.
- 43
- 44 25. Chen R, Wang J, Tang S, *et al.* Association of polymorphisms in drug transporter genes
- 45 (SLCO1B1 and SLC10A1) and anti-tuberculosis drug-induced hepatotoxicity in a Chinese
- 46
- 47
- 48
- 49
- 50
- 51
- 52
- 53
- 54
- 55
- 56



- cohort. *Tuberculosis* 2015;95:68-74.
26. Weiner M, Peloquin C, Burman W, *et al.* Effects of tuberculosis, race, and human gene SLCO1B1 polymorphisms on rifampin concentrations. *Antimicrob Agents Chemother* 2010;54:4192-200.
27. Chigutsa E, Visser ME, Swart EC, *et al.* The SLCO1B1 rs4149032 polymorphism is highly prevalent in South Africans and is associated with reduced rifampin concentrations: dosing implications. *Antimicrob Agents Chemother* 2011;55:4122-7.
28. Li LM, Chen L, Deng GH, *et al.* SLCO1B1\*15 haplotype is associated with rifampin-induced liver injury. *Mol Med Rep* 2012;6:75-82.
29. Yimer G, Ueda N, Habtewold A, *et al.* Pharmacogenetic & pharmacokinetic biomarker for efavirenz based ARV and rifampicin based anti-TB drug induced liver injury in TB-HIV infected patients. *PLoS One* 2011;6:e27810.
30. Ben Mahmoud L, Ghazzi H, Kamoun A, *et al.* Polymorphism of the N-acetyltransferase 2 gene as a susceptibility risk factor for antituberculosis drug-induced hepatotoxicity in Tunisian patients with tuberculosis. *Pathologie Biologie* 2012;60:324-30.
31. Bozok Cetintas V, Erer OF, Kosova B, *et al.* Determining the relation between N-acetyltransferase-2 acetylator phenotype and antituberculosis drug induced hepatitis by molecular biologic tests. *Tuberk Toraks* 2008;56:81-6.
32. Higuchi N, Tahara N, Yanagihara K, *et al.* NAT2 6A, a haplotype of the N-acetyltransferase 2 gene, is an important biomarker for risk of anti-tuberculosis drug-induced hepatotoxicity in Japanese patients with tuberculosis. *World J Gastroenterol* 2007;13:6003-8.
33. Ho HT, Wang TH, Hsiong CH, *et al.* The NAT2 tag SNP rs1495741 correlates with the susceptibility of antituberculosis drug-induced hepatotoxicity. *Pharmacogenet Genomics* 2013;23:200-7.
34. Huang YS, Chern HD, Su WJ, *et al.* Polymorphism of the N-acetyltransferase 2 gene as a susceptibility risk factor for antituberculosis drug-induced hepatitis. *Hepatology* 2002;35:883-9.
35. Khalili H, Fouladdel S, Sistanizad M, *et al.* Association of N-acetyltransferase-2 genotypes and anti-tuberculosis induced liver injury: First case-controlled study from Iran. *Curr Drug*

- 1  
2  
3  
4  
5  
6  
7  
8  
9  
10  
11  
12  
13  
14  
15  
16  
17  
18  
19  
20  
21  
22  
23  
24  
25  
26  
27  
28  
29  
30  
31  
32  
33  
34  
35  
36  
37  
38  
39  
40  
41  
42  
43  
44  
45  
46  
47  
48  
49  
50  
51  
52  
53  
54  
55  
56  
57  
58  
59  
60
- Saf* 2011;6:17-22.
36. Leiro-Fernandez V, Valverde D, Vazquez-Gallardo R, *et al.* N-acetyltransferase 2 polymorphisms and risk of anti-tuberculosis drug-induced hepatotoxicity in Caucasians. *International Journal of Tuberculosis and Lung Disease* 2011;15:1403-8.
37. Lv X, Tang S, Xia Y, *et al.* NAT2 genetic polymorphisms and anti-tuberculosis drug-induced hepatotoxicity in Chinese community population. *Ann Hepatol* 2012;11:700-7.
38. Ng CS, Hasnat A, Al Maruf A, *et al.* N-acetyltransferase 2 (NAT2) genotype as a risk factor for development of drug-induced liver injury relating to antituberculosis drug treatment in a mixed-ethnicity patient group. *Eur J Clin Pharmacol* 2014;70:1079-86.
39. Ohno M, Yamaguchi I, Yamamoto I, *et al.* Slow N-acetyltransferase 2 genotype affects the incidence of isoniazid and rifampicin-induced hepatotoxicity. *International Journal of Tuberculosis and Lung Disease* 2000;4:256-61.
40. Possuelo LG, Castelan JA, de Brito TC, *et al.* Association of slow N-acetyltransferase 2 profile and anti-TB drug-induced hepatotoxicity in patients from Southern Brazil. *Eur J Clin Pharmacol* 2008;64:673-81.
41. Rana SV, Ola RP, Sharma SK, *et al.* Comparison between acetylator phenotype and genotype polymorphism of n-acetyltransferase-2 in tuberculosis patients. *Hepatology International* 2012;6:397-402.
42. Shimizu Y, Dobashi K, Mita Y, *et al.* DNA microarray genotyping of N-acetyltransferase 2 polymorphism using carbodiimide as the linker for assessment of isoniazid hepatotoxicity. *Tuberculosis* 2006;86:374-81.
43. Yuliwulandari R, Susilowati RW, Wicaksono BD, *et al.* NAT2 variants are associated with drug-induced liver injury caused by anti-tuberculosis drugs in Indonesian patients with tuberculosis. *J Hum Genet* 2016; doi:10.1038/jhg.2016.10.
44. Feng FM, Guo M, Chen Y, *et al.* Genetic polymorphisms in metabolic enzymes and susceptibility to anti-tuberculosis drug-induced hepatic injury. *Genetics and Molecular Research* 2014;13:9463-71.
45. Kim SH, Kim SH, Bahn JW, *et al.* Genetic polymorphisms of drug-metabolizing enzymes and anti-TB drug-induced hepatitis. *Pharmacogenomics* 2009;10:1767-79.
46. Singh M, Gupta VH, Amarapurkar DN, *et al.* Association of genetic variants with anti-

- 1  
2  
3  
4 tuberculosis drug induced hepatotoxicity: A high resolution melting analysis. *Infection*  
5  
6 *Genetics and Evolution* 2014;23:42-8.
- 7  
8 47. Tang S, Lv X, Zhang Y, *et al.* Cytochrome P450 2E1 Gene Polymorphisms/Haplotypes  
9 and Anti-Tuberculosis Drug-Induced Hepatitis in a Chinese Cohort. *PLoS ONE*  
10 2013;8:e57526.
- 11  
12  
13 48. Chatterjee S, Lyle N, Mandal A, *et al.* GSTT1 and GSTM1 gene deletions are not  
14 associated with hepatotoxicity caused by antitubercular drugs. *Journal of Clinical*  
15 *Pharmacy and Therapeutics* 2010;35:465-70.
- 16  
17  
18 49. Gupta VH, Singh M, Amarapurkar DN, *et al.* Association of GST null genotypes with anti-  
19 tuberculosis drug induced hepatotoxicity in Western Indian population. *Annals of*  
20 *Hepatology* 2013;12:959-65.
- 21  
22  
23 50. Huang YS, Su WJ, Huang YH, *et al.* Genetic polymorphisms of manganese superoxide  
24 dismutase, NAD(P)H : quinone oxidoreductase, glutathione S-transferase M1 and T1, and  
25 the susceptibility to drug-induced liver injury. *J Hepatol* 2007;47:128-34.
- 26  
27  
28 51. Kim SH, Kim SH, Yoon HJ, *et al.* GSTT1 and GSTM1 null mutations and adverse  
29 reactions induced by antituberculosis drugs in Koreans. *Tuberculosis* 2010;90:39-43.
- 30  
31  
32 52. Leiro V, Fernandez-Villar A, Valverde D, *et al.* Influence of glutathione S-transferase M1  
33 and T1 homozygous null mutations on the risk of antituberculosis drug-induced  
34 hepatotoxicity in a Caucasian population. *Liver International* 2008;28:835-9.
- 35  
36  
37 53. Liu F, Jiao AX, Wu XR, *et al.* Impact of Glutathione S-Transferase M1 and T1 on Anti-  
38 Tuberculosis Drug-Induced Hepatotoxicity in Chinese Pediatric Patients. *Plos One* 2014;9.
- 39  
40  
41 54. Monteiro TP, El-Jaick KB, Jeovanio-Silva AL, *et al.* The roles of GSTM1 and GSTT1 null  
42 genotypes and other predictors in anti-tuberculosis drug-induced liver injury. *Journal of*  
43 *Clinical Pharmacy and Therapeutics* 2012;37:712-8.
- 44  
45  
46 55. Rana SV, Kamboj JK, Sharma SK, *et al.* Antioxidant status and GST gene polymorphisms  
47 in antitubercular treatment-induced hepatotoxicity patients. *Hepatol Int* 2013;7:876-82.
- 48  
49  
50 56. Roy B, Chowdhury A, Kundu S, *et al.* Increased risk of antituberculosis drug-induced  
51 hepatotoxicity in individuals with glutathione S-transferase M1 'null' mutation. *Journal of*  
52 *Gastroenterology and Hepatology* 2001;16:1033-7.
- 53  
54  
55 57. An HR, Wu XQ, Wang ZY, *et al.* NAT2 and CYP2E1 polymorphisms associated with  
56  
57

- 1  
2  
3  
4 antituberculosis drug-induced hepatotoxicity in Chinese patients. *Clinical and*  
5 *Experimental Pharmacology and Physiology* 2012;39:535-43.  
6  
7  
8 58. Bose PD, Sarma MP, Medhi S, *et al.* Role of polymorphic N-acetyl transferase2 and  
9 cytochrome P4502E1 gene in antituberculosis treatment-induced hepatitis. *J Gastroenterol*  
10 *Hepatol* 2011;26:312-8.  
11  
12  
13 59. Chamorro JG, Castagnino JP, Musella RM, *et al.* Sex, ethnicity, and slow acetylator profile  
14 are the major causes of hepatotoxicity induced by antituberculosis drugs. *J Gastroenterol*  
15 *Hepatol* 2013;28:323-8.  
16  
17  
18 60. Cho HJ, Koh WJ, Ryu YJ, *et al.* Genetic polymorphisms of NAT2 and CYP2E1 associated  
19 with antituberculosis drug-induced hepatotoxicity in Korean patients with pulmonary  
20 tuberculosis. *Tuberculosis* 2007;87:551-6.  
21  
22  
23 61. Gupta VH, Amarapurkar DN, Singh M, *et al.* Association of N-acetyltransferase 2 and  
24 cytochrome P450 2E1 gene polymorphisms with antituberculosis drug-induced  
25 hepatotoxicity in Western India. *J Gastroenterol Hepatol* 2013;28:1368-74.  
26  
27  
28 62. Huang YS, Chern HD, Su WJ, *et al.* Cytochrome p450 2E1 genotype and the susceptibility  
29 to antituberculosis drug-induced hepatitis. *Hepatology* 2003;37:924-30.  
30  
31  
32 63. Lee SW, Chung LS, Huang HH, *et al.* NAT2 and CYP2E1 polymorphisms and  
33 susceptibility to first-line anti-tuberculosis drug-induced hepatitis. *Int J Tuberc Lung Dis*  
34 2010;14:622-6.  
35  
36  
37 64. Mishra S, Daschakraborty S, Shukla P, *et al.* N-acetyltransferase and cytochrome P450  
38 2E1 gene polymorphisms and susceptibility to antituberculosis drug hepatotoxicity in an  
39 Indian population. *National Medical Journal of India* 2013;26:260-5.  
40  
41  
42 65. Santos NP, Callegari-Jacques SM, Ribeiro Dos Santos AK, *et al.* N-acetyl transferase 2  
43 and cytochrome P450 2E1 genes and isoniazid-induced hepatotoxicity in Brazilian patients.  
44 *Int J Tuberc Lung Dis* 2013;17:499-504.  
45  
46  
47 66. Vuilleumier N, Rossier MF, Chiappe A, *et al.* CYP2E1 genotype and isoniazid-induced  
48 hepatotoxicity in patients treated for latent tuberculosis. *Eur J Clin Pharmacol*  
49 2006;62:423-9.  
50  
51  
52 67. Yamada S, Tang M, Richardson K, *et al.* Genetic variations of NAT2 and CYP2E1 and  
53 isoniazid hepatotoxicity in a diverse population. *Pharmacogenomics* 2009;10:1433-45.  
54  
55  
56  
57  
58  
59  
60

- 1  
2  
3  
4 68. Zaverucha-do-Valle C, Monteiro SP, El-Jaick KB, *et al.* The role of cigarette smoking and  
5 liver enzymes polymorphisms in anti-tuberculosis drug-induced hepatotoxicity in Brazilian  
6 patients. *Tuberculosis (Edinb)* 2014;94:299-305.  
7  
8  
9 69. Sharma SK, Jha BK, Sharma A, *et al.* Genetic polymorphisms of CYP2E1 and GSTM1  
10 loci and susceptibility to anti-tuberculosis drug-induced hepatotoxicity. *International*  
11 *Journal of Tuberculosis and Lung Disease* 2014;18:588-93.  
12  
13  
14 70. Wang T, Yu HT, Wang W, *et al.* Genetic Polymorphisms of Cytochrome P450 and  
15 Glutathione S-transferase Associated with Antituberculosis Drug-induced Hepatotoxicity  
16 in Chinese Tuberculosis Patients. *Journal of International Medical Research* 2010;38:977-  
17 86.  
18  
19  
20  
21 71. Tang SW, Lv XZ, Zhang Y, *et al.* CYP2E1, GSTM1 and GSTT1 genetic polymorphisms  
22 and susceptibility to antituberculosis drug-induced hepatotoxicity: a nested case-control  
23 study. *J Clin Pharm Ther* 2012;37:588-93.  
24  
25  
26  
27 72. Brito TC, Possuelo LG, Valim ARM, *et al.* Polymorphisms in CYP2E1, GSTM1 and  
28 GSTT1 and anti-tuberculosis drug-induced hepatotoxicity. *Anais Da Academia Brasileira*  
29 *De Ciencias* 2014;86:855-65.  
30  
31  
32 73. Forestiero FJ, Cecon L, Hirata MH, *et al.* Relationship of NAT2, CYP2E1 and  
33 GSTM1/GSTT1 polymorphisms with mild elevation of liver enzymes in Brazilian  
34 individuals under anti-tuberculosis drug therapy. *Clinica Chimica Acta* 2013;415:215-9.  
35  
36  
37 74. Rana SV, Sharma SK, Ola RP, *et al.* N-acetyltransferase 2, cytochrome P4502E1 and  
38 glutathione S-transferase genotypes in antitubercular treatment-induced hepatotoxicity in  
39 North Indians. *J Clin Pharm Ther* 2014;39:91-6.  
40  
41  
42 75. Singla N, Gupta D, Birbian N, *et al.* Association of NAT2, GST and CYP2E1  
43 polymorphisms and anti-tuberculosis drug-induced hepatotoxicity. *Tuberculosis*  
44 2014;94:293-8.  
45  
46  
47 76. Sotsuka T, Sasaki Y, Hirai S, *et al.* Association of Isoniazid-metabolizing Enzyme  
48 Genotypes and Isoniazid-induced Hepatotoxicity in Tuberculosis Patients. *In Vivo*  
49 2011;25:803-12.  
50  
51  
52 77. Teixeira RL, Morato RG, Cabello PH, *et al.* Genetic polymorphisms of NAT2, CYP2E1  
53 and GST enzymes and the occurrence of antituberculosis drug-induced hepatitis in  
54  
55  
56

1  
2  
3  
4 Brazilian TB patients. *Mem Inst Oswaldo Cruz* 2011;106:716-24.

- 5  
6 78. Xiang Y, Ma L, Wu WD, *et al.* The Incidence of Liver Injury in Uyghur Patients Treated  
7 for TB in Xinjiang Uyghur Autonomous Region, China, and Its Association with Hepatic  
8 Enzyme Polymorphisms NAT2, CYP2E1, GSTM1 and GSTT1. *Plos One* 2014;9.  
9  
10  
11  
12  
13  
14  
15  
16  
17  
18  
19  
20  
21  
22  
23  
24  
25  
26  
27  
28  
29  
30  
31  
32  
33  
34  
35  
36  
37  
38  
39  
40  
41  
42  
43  
44  
45  
46  
47  
48  
49  
50  
51  
52  
53  
54  
55  
56  
57  
58  
59  
60

For peer review only

## Supporting information

Additional supporting information can be found in the online version of this article:

**S1 Table. Genotype distribution, the achievement of Hardy-Weinberg equilibrium (HWE), and the genotyping method used for *CYP2E1* in the included studies (n = 26)**

**S2 Table. Genotype distribution, the achievement of Hardy-Weinberg equilibrium (HWE), and the genotyping method used for *NAT2* in the included studies (n = 34)**

**S3 Table. Genotype distribution, the achievement of Hardy-Weinberg equilibrium (HWE), and the genotyping method used for *GST* in the included studies (n = 19)**

**S4 Table. Genotype distribution, the achievement of Hardy-Weinberg equilibrium (HWE), and the genotyping method used for *SLCO1B1* in the included studies (n = 4)**

**S5 Figure. Funnel plot of the meta-analysis of ATDILI risk and *CYP2E1*, *NAT2*, *GST*, and *SLCO* polymorphisms. (A) *CYP2E1* *RsaI/PstI* polymorphism, (B) *CYP2E1* *DraI* polymorphism, (C) *NAT2* polymorphism, (D) *GSTM1* polymorphism, (E) *GSTT1* polymorphism, (F) *GSTT1/MI* polymorphism, and (G) *SLCO1B1* *388A>G* and *521T>C* polymorphism.**

**S6 Table. Subgroup analysis for the association between *CYP2E1* polymorphisms and ATDILI risk**

**S7 Table. Subgroup analysis for the association between *NAT2* polymorphism and ATDILI risk**



1  
2  
3  
4 **S8 Table. Subgroup analysis for the association between *GST* polymorphisms and ATDILI**  
5  
6 **risk**

7  
8  
9 **S9 Table. Subgroup analysis for the association between *SLCO1B1* polymorphisms and**  
10  
11 **ATDILI risk**

## 12 13 14 15 16 **Figure legends**

17  
18  
19 **Figure 1.** Study selection process flowchart according to the PRISMA guideline.

20  
21 **Figure 2.** Risk of anti-tuberculosis drug-induced liver injury in patients with the *CYP2E1* (A)  
22  
23 *RsaI/PstI* c1/c1 genotype compared to c1/c2 + c2/c2 genotypes and (B) *DraI* D/D genotype  
24  
25 compared to D/C + C/C genotypes.

26  
27  
28 **Figure 3.** Risk of anti-tuberculosis drug-induced liver injury in patients with the *NAT2* slow  
29  
30 acetylator genotype compared to those with the intermediate/fast acetylator genotypes.

31  
32  
33 **Figure 4.** Risk of anti-tuberculosis drug-induced liver injury in patients with (A) the *GSTM1* null  
34  
35 genotype compared to the non-null genotype, (B) the *GSTT1* null genotype compared to the non-  
36  
37 null genotype, and (C) the *GSTM1/GSTT1* dual-null genotype compared to the one- and non-null  
38  
39 genotypes.

40  
41  
42 **Figure 5.** Risk of anti-tuberculosis drug-induced liver injury in patients with the *SLCO1B1* (A)  
43  
44 388 AA genotype compared to the 388 AG + GG genotypes and (B) 521 CC genotype compared  
45  
46 to the 521 TC + TT genotypes.



**Table 1.** Characteristics of the Studies Included in the meta-analysis (n = 53 studies)

| First author last name, year        | Polymorphic gene | Ethnicity  | Sample size (case/control) | Age (years) (case/control) <sup>a</sup> | Male (%) (case/control) | Anti-TB drug regimen administered | Diagnostic criteria of ATDILI | Quality score |
|-------------------------------------|------------------|------------|----------------------------|-----------------------------------------|-------------------------|-----------------------------------|-------------------------------|---------------|
| Ben Mahmoud, 2012 <sup>30</sup>     | <i>NAT2</i>      | Tunisian   | 14/52                      | 42.4/42.1                               | 42.8/48.1               | INH, RIF containing regimen       | ALT > 2 × ULN                 | 6             |
| Bozok Cetintas, 2008 <sup>31</sup>  | <i>NAT2</i>      | Turkish    | 30/70                      | 39.8/37.3                               | 50.0/72.8               | INH, RIF, PZA, EMB                | ALT > 3 × ULN                 | 5             |
| Higuchi, 2007 <sup>32</sup>         | <i>NAT2</i>      | Japanese   | 18/82                      | 60.8/64.7                               | 50.0/57.3               | INH, RIF containing regimen       | ALT > 2 × ULN                 | 6             |
| Ho, 2013 <sup>33</sup>              | <i>NAT2</i>      | Taiwanese  | 20/328                     | NA/NA                                   | NA/NA                   | INH, RIF, PZA, EMB                | ALT > 5 × ULN                 | 5             |
| Huang, 2002 <sup>34</sup>           | <i>NAT2</i>      | Taiwanese  | 33/191                     | 73.3/63.7                               | 87.9/88.5               | INH, RIF, PZA, EMB                | ALT > 2 × ULN                 | 6             |
| Khalili, 2011 <sup>35</sup>         | <i>NAT2</i>      | Iranian    | 14/36                      | NA/NA                                   | NA/NA                   | INH, RIF, PZA, EMB                | ALT > 3 × ULN                 | 6             |
| Leiro-Fernandez, 2011 <sup>36</sup> | <i>NAT2</i>      | Caucasian  | 50/67                      | 34.0/30.5 <sup>b</sup>                  | 54.0/56.7               | INH, RIF, PZA                     | ALT > 3 × ULN                 | 7             |
| Lv, 2012 <sup>37</sup>              | <i>NAT2</i>      | Chinese    | 89/356                     | 42.0/42.0 <sup>b</sup>                  | 73.0/73.0               | INH, RIF, PZA, EMB                | ALT > 2 × ULN                 | 7             |
| Ng, 2014 <sup>38</sup>              | <i>NAT2</i>      | Mixed      | 26/101                     | 48.3/NA                                 | 38.5/NA                 | INH containing regimen            | ALT > 5 × ULN                 | 6             |
| Ohno, 2000 <sup>39</sup>            | <i>NAT2</i>      | Japanese   | 14/63                      | NA/NA                                   | NA/NA                   | INH, RIF                          | ALT > 1.5 × ULN               | 7             |
| Possuelo, 2008 <sup>40</sup>        | <i>NAT2</i>      | Brazilian  | 14/240                     | 38.9/36.5                               | 50.0/66.9               | INH, RIF, PZA                     | ALT > 3 × ULN                 | 7             |
| Rana, 2012 <sup>41</sup>            | <i>NAT2</i>      | Indian     | 50/201                     | 45.3/43.8                               | 76.0/57.2               | INH, RIF, PZA, EMB                | ALT > 5 × ULN                 | 7             |
| Shimizu, 2006 <sup>42</sup>         | <i>NAT2</i>      | Japanese   | 10/32                      | 60.5/64.9                               | 70.0/46.9               | INH, RIF                          | ALT > 2 × ULN                 | 5             |
| Yuliwulandari, 2016 <sup>43</sup>   | <i>NAT2</i>      | Indonesian | 50/191                     | NA/NA                                   | NA/NA                   | NA                                | ALT > 2 × ULN                 | 6             |
| Feng, 2014 <sup>44</sup>            | <i>CYP2E1</i>    | Chinese    | 173/173                    | 48.8/48.6                               | 68.0/68.0               | INH, RIF, PZA                     | ALT > 3 × ULN                 | 6             |

|                                |                     |                        |         |                        |           |                        |               |   |
|--------------------------------|---------------------|------------------------|---------|------------------------|-----------|------------------------|---------------|---|
| Kim, 2009 <sup>45</sup>        | <i>CYP2E1</i>       | Korean                 | 67/159  | 42.1/42.8              | 65.7/65.4 | INH, RIF, PZA, EMB     | ALT > 2 × ULN | 6 |
| Singh, 2014 <sup>46</sup>      | <i>CYP2E1</i>       | Indian                 | 50/135  | NA/NA                  | NA/NA     | NA                     | ALT > 2 × ULN | 6 |
| Tang, 2013 <sup>47</sup>       | <i>CYP2E1</i>       | Chinese                | 89/356  | 43.7/43.6              | 73.0/73.0 | INH, RIF, PZA, EMB     | ALT > 2 × ULN | 7 |
| Chatterjee, 2010 <sup>48</sup> | <i>GSTM1, GSTT1</i> | Indian                 | 51/100  | 37.2/33.2              | 49.0/63.0 | INH, RIF, PZA          | ALT > 3 × ULN | 7 |
| Gupta, 2013 <sup>49</sup>      | <i>GSTM1, GSTT1</i> | Indian                 | 50/246  | 37.0/36.5 <sup>b</sup> | 48.0/56.5 | INH, RIF, PZA, EMB     | ALT > 2 × ULN | 7 |
| Huang, 2007 <sup>50</sup>      | <i>GSTM1, GSTT1</i> | Taiwanese              | 63/63   | 62.0/NA                | NA/NA     | NA                     | ALT > 5 × ULN | 6 |
| Kim, 2010 <sup>51</sup>        | <i>GSTM1, GSTT1</i> | Korean                 | 57/190  | 47.3/42.4              | 59.6/67.9 | INH, RIF, PZA, EMB     | ALT > 3 × ULN | 7 |
| Leiro, 2008 <sup>52</sup>      | <i>GSTM1, GSTT1</i> | Caucasian              | 35/60   | 34.0/31.0 <sup>b</sup> | 40.0/41.7 | INH, RIF, PZA          | ALT > 3 × ULN | 7 |
| Liu, 2014 <sup>53</sup>        | <i>GSTM1, GSTT1</i> | Chinese                | 20/143  | 35.9/61.2              | 60.0/59.4 | INH containing regimen | ALT > 2 × ULN | 7 |
| Monteiro, 2012 <sup>54</sup>   | <i>GSTM1, GSTT1</i> | Brazilian              | 59/118  | 37.0/38.0 <sup>b</sup> | 76.0/61.0 | NA                     | ALT > 2 × ULN | 7 |
| Rana, 2013 <sup>55</sup>       | <i>GSTM1, GSTT1</i> | Indian                 | 30/220  | 43.6/42.3              | 60.0/64.5 | INH, RIF               | ALT > 5 × ULN | 6 |
| Roy, 2001 <sup>56</sup>        | <i>GSTM1, GSTT1</i> | Indian                 | 33/33   | NA/NA                  | NA/NA     | INH, RIF, PZA, EMB     | ALT > 2 × ULN | 7 |
| Chen, 2015 <sup>25</sup>       | <i>SLCO1B1</i>      | Chinese                | 89/356  | 43.7/43.6              | 73.0/73.0 | INH, RIF, PZA, EMB     | ALT > 2 × ULN | 7 |
| Kim, 2012 <sup>11</sup>        | <i>SLCO1B1</i>      | Korean                 | 67/159  | 43.0/42.8              | 65.7/65.4 | INH, RIF, PZA, EMB     | ALT > 2 × ULN | 6 |
| Li, 2012 <sup>28</sup>         | <i>SLCO1B1</i>      | Chinese                | 118/155 | 40.5/39.3              | 48.3/54.8 | RIF                    | ALT > 3 × ULN | 7 |
| An, 2012 <sup>57</sup>         | <i>NAT2, CYP2E1</i> | Chinese                | 101/107 | 36.0/33.4 <sup>b</sup> | 55.0/70.0 | INH, RIF, PZA, EMB     | ALT > 2 × ULN | 7 |
| Bose, 2011 <sup>58</sup>       | <i>NAT2, CYP2E1</i> | Indian                 | 41/177  | 38.0/36.0              | 43.9/47.4 | INH, RIF, PZA, EMB     | ALT > 2 × ULN | 7 |
| Chamorro, 2013 <sup>59</sup>   | <i>NAT2, CYP2E1</i> | Mixed (South American) | 47/128  | 29.0/27.0              | 41.3/64.8 | INH, RIF, PZA, EMB     | ALT > 3 × ULN | 7 |
| Cho, 2007 <sup>60</sup>        | <i>NAT2</i>         | Korean                 | 18/114  | 51.2/46.7              | 66.7/55.3 | INH, RIF,              | ALT > 2 ×     | 6 |

|                                        |                                   |           |         |                                                      |           |                    |                      |   |
|----------------------------------------|-----------------------------------|-----------|---------|------------------------------------------------------|-----------|--------------------|----------------------|---|
|                                        | <i>CYP2E1</i>                     |           |         |                                                      |           | PZA, EMB           | ULN                  |   |
| Gupta, 2013 <sup>61</sup>              | <i>NAT2, CYP2E1</i>               | Indian    | 50/165  | 37.0/38.0                                            | 48.0/60.0 | INH, RIF, PZA, EMB | ALT > 2 × ULN        | 7 |
| Huang, 2003 <sup>62</sup>              | <i>NAT2, CYP2E1</i>               | Taiwanese | 49/269  | 70.0/59.0 <sup>b</sup>                               | 18.4/14.9 | INH, RIF, PZA, EMB | ALT > 2 × ULN        | 6 |
| Lee, 2010 <sup>63</sup>                | <i>NAT2, CYP2E1</i>               | Taiwanese | 45/95   | 58.4/54.9                                            | 60.0/66.3 | INH, RIF, PZA, EMB | ALT > 2 × ULN        | 6 |
| Mishra, 2013 <sup>64</sup>             | <i>NAT2, CYP2E1</i>               | Indian    | 33/173  | 38.0/NA                                              | 52.0/NA   | INH, RIF, PZA, EMB | ALT > 3 × ULN        | 7 |
| Santos, 2013 <sup>65</sup>             | <i>NAT2, CYP2E1</i>               | Brazilian | 18/252  | 47.7/45.6                                            | 56.0/49.0 | INH, RIF           | ALT > 3 × ULN        | 7 |
| Vuilleumier, 2006 <sup>66</sup>        | <i>NAT2, CYP2E1</i>               | Mixed     | 8/63    | 27-35: 2/22 <sup>c</sup><br>>36 : 5/18 <sup>c</sup>  | 38.0/51.0 | INH                | AST or ALT > 4 × ULN | 7 |
| Yamada, 2009 <sup>67</sup>             | <i>NAT2, CYP2E1</i>               | Mixed     | 23/147  | NA/NA                                                | 13.0/42.9 | INH                | ALT > 2 × ULN        | 7 |
| Zaverucha-do-Valle, 2014 <sup>68</sup> | <i>NAT2, CYP2E1</i>               | Brazilian | 50/79   | < 40: 28/43 <sup>c</sup><br>> 40: 20/36 <sup>c</sup> | 60.4/72.2 | INH, RIF, PZA      | ALT > 2 × ULN        | 6 |
| Sharma, 2014 <sup>69</sup>             | <i>CYP2E1, GSTM1</i>              | Indian    | 105/185 | 35.2/27.6                                            | 55.7/72.1 | INH, RIF, PZA, EMB | ALT > 5 × ULN        | 7 |
| Wang, 2010 <sup>70</sup>               | <i>CYP2E1, GSTM1</i>              | Chinese   | 104/111 | 48.6/44.7                                            | 67.3/67.6 | INH, RIF, PZA, EMB | ALT > 2 × ULN        | 7 |
| Tang, 2012 <sup>71</sup>               | <i>CYP2E1, GSTM1, GSTT1</i>       | Chinese   | 89/356  | 43.7/43.6                                            | 73.0/73.0 | INH, RIF, PZA, EMB | ALT > 2 × ULN        | 7 |
| Yimer, 2011 <sup>29</sup>              | <i>NAT2, SLCO1B1</i>              | Ethiopian | 41/160  | NA/NA                                                | NA/NA     | INH, RIF, PZA, EMB | ALT > 2 × ULN        | 6 |
| Brito, 2014 <sup>72</sup>              | <i>NAT2, CYP2E1, GSTM1, GSTT1</i> | Brazilian | 15/230  | 38.1/36.8                                            | 46.7/NA   | INH, RIF, PZA      | ALT > 3 × ULN        | 7 |
| Forestiero, 2013 <sup>73</sup>         | <i>NAT2, CYP2E1, GSTM1, GSTT1</i> | Brazilian | 59/40   | NA/NA                                                | 49.2/60.0 | INH, RIF, PZA      | ALT > 2.5 × ULN      | 5 |
| Rana, 2014 <sup>74</sup>               | <i>NAT2, CYP2E1, GSTM1, GSTT1</i> | Indian    | 55/245  | 43.6/42.3                                            | 60.0/62.0 | INH, RIF, PZA, EMB | ALT > 5 × ULN        | 6 |

|                                 |                                                                    |           |         |           |           |                                 |                  |   |
|---------------------------------|--------------------------------------------------------------------|-----------|---------|-----------|-----------|---------------------------------|------------------|---|
| Singla, 2014 <sup>75</sup>      | <i>NAT2</i> ,<br><i>CYP2E1</i> ,<br><i>GSTM1</i> ,<br><i>GSTT1</i> | Indian    | 17/391  | 48.2/32.7 | 64.7/61.4 | INH, RIF,<br>PZA, EMB,<br>STM   | ALT > 2 ×<br>ULN | 7 |
| Sotsuka, 2011<br><sup>76</sup>  | <i>NAT2</i> ,<br><i>CYP2E1</i> ,<br><i>GSTM1</i> ,<br><i>GSTT1</i> | Japanese  | 20/92   | 54.9/50.4 | 90.0/73.9 | INH, RIF,<br>PZA, EMB<br>or STM | ALT > 3 ×<br>ULN | 6 |
| Teixeira, 2011<br><sup>77</sup> | <i>NAT2</i> ,<br><i>CYP2E1</i> ,<br><i>GSTM1</i> ,<br><i>GSTT1</i> | Brazilian | 26/141  | 47.6/43.0 | 61.5/52.5 | INH<br>containing<br>regimen    | ALT > 3 ×<br>ULN | 7 |
| Xiang, 2014 <sup>78</sup>       | <i>NAT2</i> ,<br><i>CYP2E1</i> ,<br><i>GSTM1</i> ,<br><i>GSTT1</i> | Chinese   | 89/2155 | 37.0/44.5 | 67.4/55.7 | INH, RIF,<br>PZA, EMB           | ALT > 2 ×<br>ULN | 7 |

Abbreviations: **ALT**, alanine aminotransferase; **AST**, aspartate aminotransferase; **ATDILI**, anti-tuberculosis drug-induced liver injury; **CYP2E1**, cytochrome P450 2E1; **EMB**, ethambutol; **GSTM1**, glutathione S-transferase Mu 1; **GSTT1**, glutathione S-transferase Theta 1; **INH**, isoniazid; **NA**, not available; **NAT2**, N-acetyltransferase 2; **PZA**, pyrazinamide; **RIF**, rifampicin; **SLCO1B1**, solute carrier organic anion transporter family, member 1B1 (encoding organic anion transporting polypeptide 1B1 [OATP1B1]); **STM**, streptomycin; **TB**, tuberculosis; **ULN**, upper limit of normal

<sup>a</sup> Mean unless otherwise stated

<sup>b</sup> Median age

<sup>c</sup> Number of individuals in the age ranges

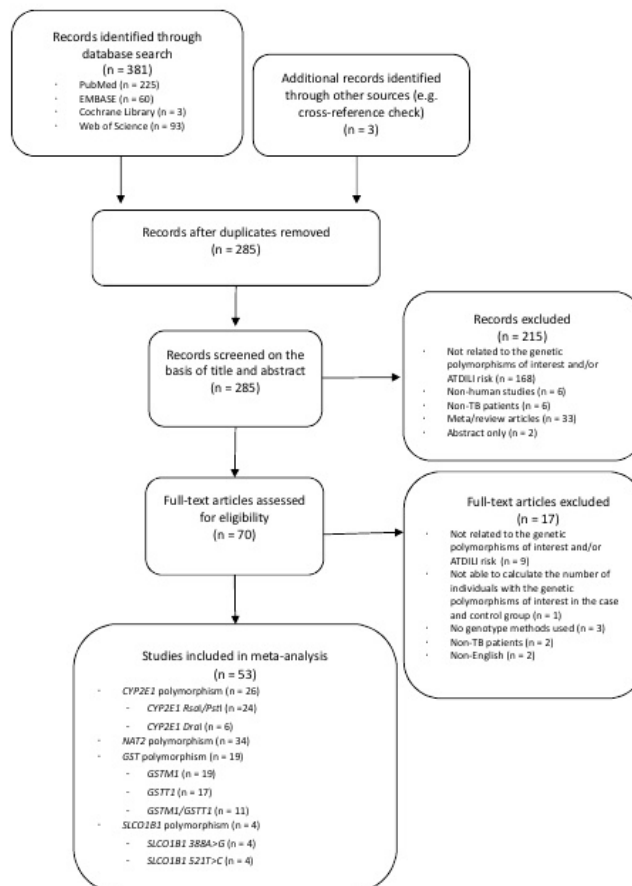

Study selection process flowchart according to the PRISMA guideline

209x297mm (72 x 72 DPI)

(A) CYP2E1 RsaI/PstI c1/c1 genotype compared to c1/c2 + c2/c2 genotypes

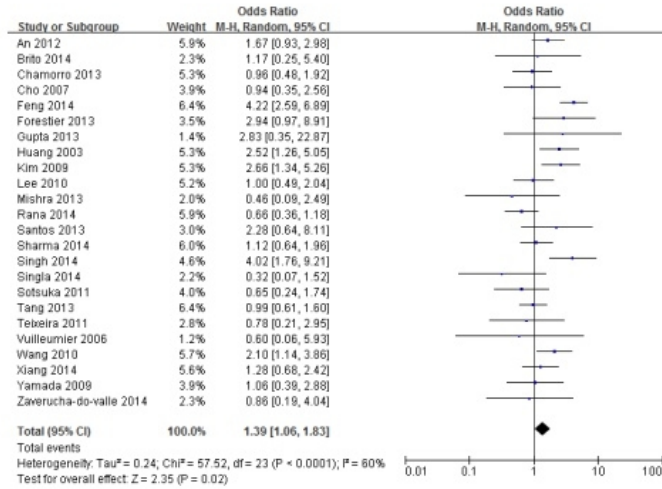

(B) CYP2E1 DraI D/D genotype compared to D/C + C/C genotypes.

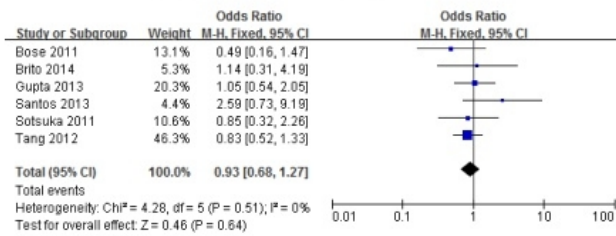

Risk of anti-tuberculosis drug-induced liver injury in patients with the CYP2E1 (A) RsaI/PstI c1/c1 genotype compared to c1/c2 + c2/c2 genotypes and (B) DraI D/D genotype compared to D/C + C/C genotypes

209x297mm (72 x 72 DPI)

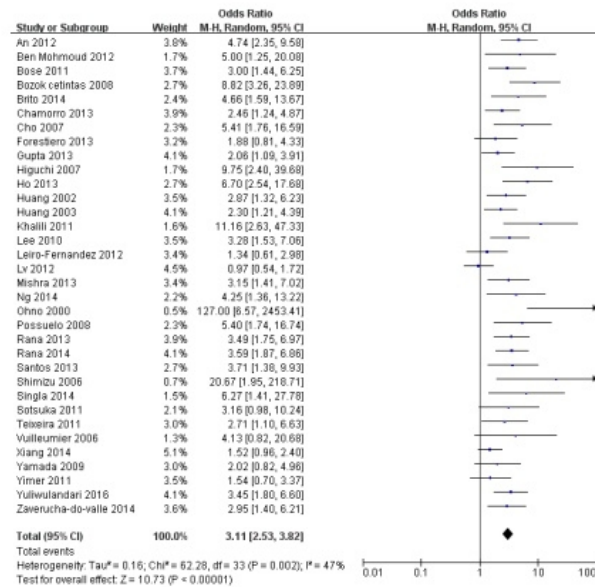

Risk of anti-tuberculosis drug-induced liver injury in patients with the NAT2 slow acetylator genotype compared to those with the intermediate/fast acetylator genotypes

209x297mm (72 x 72 DPI)

(A) *GSTM1* null genotype compared to the non-null genotype

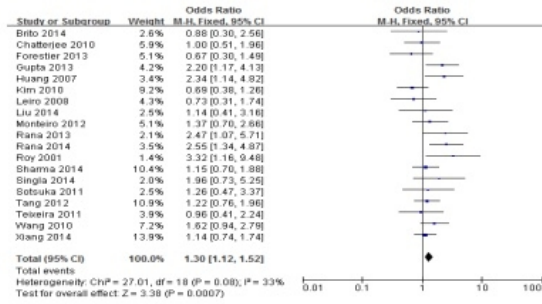

(B) *GSTT1* null genotype compared to the non-null genotype

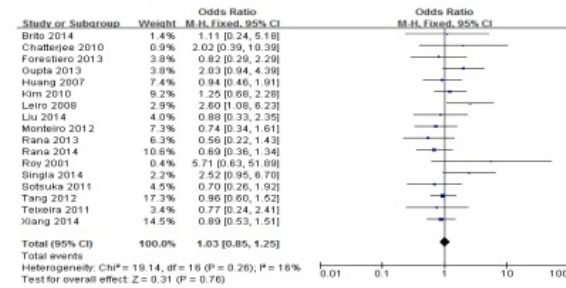

(C) *GSTM1/GSTT1* dual-null genotype compared to the one- and non-null genotypes

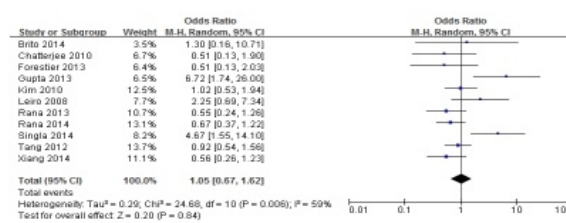

Risk of anti-tuberculosis drug-induced liver injury in patients with (A) the *GSTM1* null genotype compared to the non-null genotype, (B) the *GSTT1* null genotype compared to the non-null genotype, and (C) the *GSTM1/GSTT1* dual-null genotype compared to the one- and non-null genotypes

209x297mm (72 x 72 DPI)



**(A) 388 AA genotype compared to the 388 AG + GG genotypes**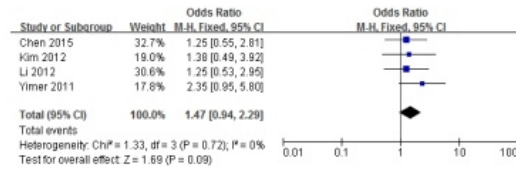**(B) 521 CC genotype compared to the 521 TC + TT genotypes**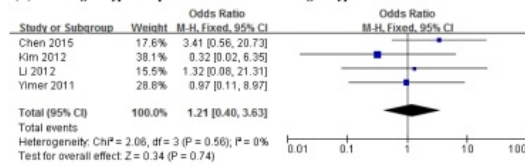

Risk of anti-tuberculosis drug-induced liver injury in patients with the SLCO1B1 (A) 388 AA genotype compared to the 388 AG + GG genotypes and (B) 521 CC genotype compared to the 521 TC + TT genotypes

209x297mm (72 x 72 DPI)

## Supplementary data

**S1 Table. Genotype distribution, the achievement of Hardy-Weinberg equilibrium (HWE), and the genotyping method used for *CYP2E1* in the included studies (n = 26)**

| Study                   | <i>RsaI/PstI</i> genotype (n = 24) |               |                                     |               | HWE | <i>DraI</i> genotype (n = 6)     |           |                                     |            | HWE | Genotyping method |
|-------------------------|------------------------------------|---------------|-------------------------------------|---------------|-----|----------------------------------|-----------|-------------------------------------|------------|-----|-------------------|
|                         | Case (number of individuals [%])   |               | Control (number of individuals [%]) |               |     | Case (number of individuals [%]) |           | Control (number of individuals [%]) |            |     |                   |
|                         | C1/C1                              | C1/C2 + C2/C2 | C1/C1                               | C1/C2 + C2/C2 |     | D/D                              | D/C + C/C | D/D                                 | D/C + C/C  |     |                   |
| An <sup>1</sup>         | 72 (71.3)                          | 29 (28.7)     | 64 (59.8)                           | 43 (40.2)     | Yes | NA                               | NA        | NA                                  | NA         | NA  | Sequencing        |
| Bose <sup>2</sup>       | NA                                 | NA            | NA                                  | NA            | NA  | 4 (9.8)                          | 37 (90.2) | 32 (18.1)                           | 145 (81.9) | No  | PCR-RFLP          |
| Brito <sup>3</sup>      | 13 (86.7)                          | 2 (13.3)      | 195 (84.8)                          | 35 (15.2)     | No  | 12 (80.0)                        | 3 (20.0)  | 179 (76.8)                          | 54 (23.2)  | Yes | PCR-RFLP          |
| Chamorro <sup>4</sup>   | 30 (63.8)                          | 17 (36.2)     | 83 (64.8)                           | 45 (35.2)     | No  | NA                               | NA        | NA                                  | NA         | NA  | PCR-RFLP          |
| Cho <sup>5</sup>        | 10 (55.6)                          | 8 (44.4)      | 65 (57.0)                           | 49 (43.0)     | No  | NA                               | NA        | NA                                  | NA         | NA  | Sequencing        |
| Feng <sup>6</sup>       | 142 (82.1)                         | 31 (17.9)     | 90 (52.0)                           | 83 (48.0)     | Yes | NA                               | NA        | NA                                  | NA         | NA  | Sequencing        |
| Forestiero <sup>7</sup> | 53 (89.8)                          | 6 (10.2)      | 30 (75.0)                           | 10 (25.0)     | Yes | NA                               | NA        | NA                                  | NA         | NA  | PCR-RFLP          |
| Gupta <sup>8</sup>      | 49 (98.0)                          | 1 (2.0)       | 156 (94.5)                          | 9 (5.5)       | No  | 33 (66.0)                        | 17 (34.0) | 107 (64.9)                          | 58 (35.1)  | Yes | PCR-RFLP          |
| Huang <sup>9</sup>      | 37 (75.5)                          | 12 (24.5)     | 148 (55.0)                          | 121 (45.0)    | Yes | NA                               | NA        | NA                                  | NA         | NA  | PCR-RFLP          |

|    |                           |           |           |            |            |     |           |           |            |            |     |            |
|----|---------------------------|-----------|-----------|------------|------------|-----|-----------|-----------|------------|------------|-----|------------|
| 1  |                           |           |           |            |            |     |           |           |            |            |     |            |
| 2  |                           |           |           |            |            |     |           |           |            |            |     |            |
| 3  | Kim <sup>10</sup>         | 54 (81.8) | 12 (18.2) | 97 (63.4)  | 56 (36.6)  | Yes | NA        | NA        | NA         | NA         | NA  | SNP stream |
| 4  |                           |           |           |            |            |     |           |           |            |            |     |            |
| 5  |                           |           |           |            |            |     |           |           |            |            |     |            |
| 6  | Lee <sup>11</sup>         | 26 (57.8) | 19 (42.2) | 55 (57.9)  | 40 (42.1)  | No  | NA        | NA        | NA         | NA         | NA  | Taqman     |
| 7  |                           |           |           |            |            |     |           |           |            |            |     |            |
| 8  | Mishra <sup>12</sup>      | 31 (93.9) | 2 (6.1)   | 168 (97.1) | 5 (2.9)    | No  | NA        | NA        | NA         | NA         | NA  | PCR-RFLP   |
| 9  |                           |           |           |            |            |     |           |           |            |            |     |            |
| 10 |                           |           |           |            |            |     |           |           |            |            |     |            |
| 11 | Rana <sup>13</sup>        | 28 (50.9) | 27 (49.1) | 150 (61.2) | 95 (38.8)  | No  | NA        | NA        | NA         | NA         | NA  | PCR-RFLP   |
| 12 |                           |           |           |            |            |     |           |           |            |            |     |            |
| 13 |                           |           |           |            |            |     |           |           |            |            |     |            |
| 14 | Santos <sup>14</sup>      | 15 (83.3) | 3 (16.7)  | 173 (75.6) | 56 (24.4)  | Yes | 15 (83.3) | 3 (16.7)  | 166 (72.8) | 62 (27.2)  | Yes | Taqman     |
| 15 |                           |           |           |            |            |     |           |           |            |            |     |            |
| 16 | Sharma <sup>15</sup>      | 81 (77.1) | 24 (22.9) | 139 (75.1) | 46 (24.9)  | Yes | NA        | NA        | NA         | NA         | NA  | PCR-RFLP   |
| 17 |                           |           |           |            |            |     |           |           |            |            |     |            |
| 18 |                           |           |           |            |            |     |           |           |            |            |     |            |
| 19 | Singh <sup>16</sup>       | 42 (84.0) | 8 (16.0)  | 77 (56.6)  | 59 (43.4)  | No  | NA        | NA        | NA         | NA         | NA  | PCR-RFLP   |
| 20 |                           |           |           |            |            |     |           |           |            |            |     |            |
| 21 |                           |           |           |            |            |     |           |           |            |            |     |            |
| 22 | Singla <sup>17</sup>      | 15 (88.0) | 2 (12.0)  | 375 (96.0) | 16 (4.0)   | No  | NA        | NA        | NA         | NA         | NA  | PCR-RFLP   |
| 23 |                           |           |           |            |            |     |           |           |            |            |     |            |
| 24 |                           |           |           |            |            |     |           |           |            |            |     |            |
| 25 | Sotsuka <sup>18</sup>     | 11 (55.0) | 9 (45.0)  | 60 (65.2)  | 32 (34.8)  | No  | 9 (45.0)  | 11 (55.0) | 45 (48.9)  | 47 (51.1)  | Yes | PCR-RFLP   |
| 26 |                           |           |           |            |            |     |           |           |            |            |     |            |
| 27 |                           |           |           |            |            |     |           |           |            |            |     |            |
| 28 | Tang <sup>19</sup>        | NA        | NA        | NA         | NA         | NA  | 47 (52.8) | 42 (47.2) | 204 (57.3) | 152 (42.7) | Yes | PCR-RFLP   |
| 29 |                           |           |           |            |            |     |           |           |            |            |     |            |
| 30 | Tang <sup>20</sup>        | 56 (62.9) | 33 (37.1) | 225 (63.2) | 131 (36.8) | Yes | NA        | NA        | NA         | NA         | NA  | Taqman     |
| 31 |                           |           |           |            |            |     |           |           |            |            |     |            |
| 32 |                           |           |           |            |            |     |           |           |            |            |     |            |
| 33 | Teixeira <sup>21</sup>    | 23 (88.5) | 3 (11.5)  | 128 (90.8) | 13 (9.2)   | Yes | NA        | NA        | NA         | NA         | NA  | PCR-RFLP   |
| 34 |                           |           |           |            |            |     |           |           |            |            |     |            |
| 35 |                           |           |           |            |            |     |           |           |            |            |     |            |
| 36 | Vuilleumier <sup>22</sup> | 7 (87.5)  | 1 (12.5)  | 58 (92.1)  | 5 (7.9)    | Yes | NA        | NA        | NA         | NA         | NA  | PCR-RFLP   |
| 37 |                           |           |           |            |            |     |           |           |            |            |     |            |
| 38 |                           |           |           |            |            |     |           |           |            |            |     |            |
| 39 |                           |           |           |            |            |     |           |           |            |            |     |            |
| 40 |                           |           |           |            |            |     |           |           |            |            |     |            |
| 41 |                           |           |           |            |            |     |           |           |            |            |     |            |
| 42 |                           |           |           |            |            |     |           |           |            |            |     |            |
| 43 |                           |           |           |            |            |     |           |           |            |            |     |            |
| 44 |                           |           |           |            |            |     |           |           |            |            |     |            |
| 45 |                           |           |           |            |            |     |           |           |            |            |     |            |
| 46 |                           |           |           |            |            |     |           |           |            |            |     |            |

|    |                                  |           |           |             |            |     |    |    |    |    |    |                                               |
|----|----------------------------------|-----------|-----------|-------------|------------|-----|----|----|----|----|----|-----------------------------------------------|
| 1  |                                  |           |           |             |            |     |    |    |    |    |    |                                               |
| 2  |                                  |           |           |             |            |     |    |    |    |    |    |                                               |
| 3  | Wang <sup>23</sup>               | 82 (78.8) | 22 (21.2) | 71 (64.0)   | 40 (36.0)  | No  | NA | NA | NA | NA | NA | PCR-RFLP                                      |
| 4  |                                  |           |           |             |            |     |    |    |    |    |    |                                               |
| 5  |                                  |           |           |             |            |     |    |    |    |    |    |                                               |
| 6  | Xiang <sup>24</sup>              | 58 (82.9) | 12 (17.1) | 1264 (79.0) | 336 (21.0) | Yes | NA | NA | NA | NA | NA | PCR/ligase<br>detection<br>reaction<br>assays |
| 7  |                                  |           |           |             |            |     |    |    |    |    |    |                                               |
| 8  |                                  |           |           |             |            |     |    |    |    |    |    |                                               |
| 9  | Yamada <sup>25</sup>             | 17 (73.9) | 6 (26.1)  | 107 (72.8)  | 40 (27.2)  | Yes | NA | NA | NA | NA | NA | PCR-RFLP                                      |
| 10 |                                  |           |           |             |            |     |    |    |    |    |    |                                               |
| 11 |                                  |           |           |             |            |     |    |    |    |    |    |                                               |
| 12 | Zaverucha-do-Valle <sup>26</sup> | 48 (94.1) | 3 (5.9)   | 74 (94.9)   | 4 (5.1)    | Yes | NA | NA | NA | NA | NA | PCR-RFLP                                      |
| 13 |                                  |           |           |             |            |     |    |    |    |    |    |                                               |
| 14 |                                  |           |           |             |            |     |    |    |    |    |    |                                               |

Abbreviations: *HWE*, Hardy-Weinberg equilibrium; *NA*, not available; *PCR*, polymerase chain reaction; *RFLP*, restriction fragment length polymorphism; *SNP*, single nucleotide polymorphism

**S2 Table. Genotype distribution, the achievement of Hardy-Weinberg equilibrium (HWE), and the genotyping method used for *NAT2* in the included studies (n = 34)**

| Study                        | Case (number of individuals [%]) |                                  | Control (number of individuals [%]) |                                  | HWE | Genotyping method  |
|------------------------------|----------------------------------|----------------------------------|-------------------------------------|----------------------------------|-----|--------------------|
|                              | Slow acetylator                  | Intermediate and fast acetylator | Slow acetylator                     | Intermediate and fast acetylator |     |                    |
| An <sup>1</sup>              | 40 (39.6)                        | 61 (60.4)                        | 13 (12.1)                           | 94 (87.9)                        | Yes | Sequencing         |
| Ben Mahmoud <sup>27</sup>    | 11 (78.5)                        | 3 (21.5)                         | 22 (42.4)                           | 30 (57.6)                        | Yes | PCR-RFLP           |
| Bose <sup>2</sup>            | 29 (70.7)                        | 12 (29.3)                        | 79 (44.6)                           | 98 (55.4)                        | No  | PCR-RFLP           |
| Bozok Cetintas <sup>28</sup> | 23 (76.7)                        | 7 (23.3)                         | 19 (27.1)                           | 51 (72.9)                        | No  | PCR                |
| Brito <sup>3</sup>           | 9 (60.0)                         | 6 (40.0)                         | 56 (24.3)                           | 174 (75.7)                       | No  | PCR-RFLP           |
| Chamorro <sup>4</sup>        | 28 (58.7)                        | 19 (41.3)                        | 48 (37.5)                           | 80 (62.5)                        | No  | PCR-RFLP           |
| Cho <sup>5</sup>             | 7 (38.9)                         | 11 (61.1)                        | 12 (10.5)                           | 102 (89.5)                       | No  | Sequencing         |
| Forestiero <sup>7</sup>      | 28 (47.4)                        | 31 (52.6)                        | 13 (32.5)                           | 27 (67.5)                        | Yes | PCR-RFLP           |
| Gupta <sup>8</sup>           | 28 (56.0)                        | 22 (44.0)                        | 63 (38.2)                           | 102 (61.8)                       | Yes | PCR-RFLP           |
| Higuchi <sup>29</sup>        | 6 (33.3)                         | 12 (66.7)                        | 4 (4.9)                             | 78 (95.1)                        | Yes | PCR-RFLP           |
| Ho <sup>30</sup>             | 12 (63.2)                        | 7 (36.8)                         | 67 (20.4)                           | 262 (79.6)                       | Yes | Sequenom MassARRAY |

|    |                               |           |           |            |            |     |            |
|----|-------------------------------|-----------|-----------|------------|------------|-----|------------|
| 1  |                               |           |           |            |            |     |            |
| 2  |                               |           |           |            |            |     |            |
| 3  | Huang <sup>31</sup>           | 14 (42.4) | 19 (57.6) | 39 (20.4)  | 152 (79.6) | No  | PCR-RFLP   |
| 4  |                               |           |           |            |            |     |            |
| 5  | Huang <sup>9</sup>            | 19 (38.8) | 30 (61.2) | 58 (21.6)  | 211 (78.4) | Yes | PCR-RFLP   |
| 6  |                               |           |           |            |            |     |            |
| 7  | Khalili, <sup>32</sup>        | 9 (64.3)  | 5 (35.7)  | 5 (13.9)   | 31 (86.1)  | Yes | PCR-RFLP   |
| 8  |                               |           |           |            |            |     |            |
| 9  |                               |           |           |            |            |     |            |
| 10 | Lee <sup>11</sup>             | 21 (46.7) | 24 (53.3) | 20 (21.1)  | 75 (78.9)  | No  | Taqman     |
| 11 |                               |           |           |            |            |     |            |
| 12 | Leiro-Fernandez <sup>33</sup> | 36 (72.0) | 14 (28.0) | 44 (65.7)  | 23 (34.3)  | No  | PCR-RFLP   |
| 13 |                               |           |           |            |            |     |            |
| 14 |                               |           |           |            |            |     |            |
| 15 | Lv <sup>34</sup>              | 18 (20.2) | 71 (79.8) | 74 (20.8)  | 282 (79.2) | Yes | PCR-RFLP   |
| 16 |                               |           |           |            |            |     |            |
| 17 | Mishra <sup>12</sup>          | 23 (70.0) | 10 (30.0) | 73 (42.0)  | 100 (58.0) | Yes | PCR-RFLP   |
| 18 |                               |           |           |            |            |     |            |
| 19 | Ng <sup>35</sup>              | 22 (84.6) | 4 (15.4)  | 57 (56.4)  | 44 (43.6)  | Yes | PCR-RFLP   |
| 20 |                               |           |           |            |            |     |            |
| 21 |                               |           |           |            |            |     |            |
| 22 | Ohno <sup>36</sup>            | 7 (50.0)  | 7 (50.0)  | 0 (0.0)    | 63 (100.0) | Yes | PCR-RFLP   |
| 23 |                               |           |           |            |            |     |            |
| 24 | Possuelo <sup>37</sup>        | 9 (64.3)  | 5 (35.7)  | 60 (25.0)  | 180 (75.0) | No  | Sequencing |
| 25 |                               |           |           |            |            |     |            |
| 26 |                               |           |           |            |            |     |            |
| 27 | Rana <sup>38</sup>            | 19 (38.0) | 31 (62.0) | 30 (14.9)  | 171 (85.1) | No  | PCR-RFLP   |
| 28 |                               |           |           |            |            |     |            |
| 29 | Rana <sup>13</sup>            | 21 (38.2) | 34 (61.8) | 36 (14.7)  | 209 (85.3) | Yes | PCR-RFLP   |
| 30 |                               |           |           |            |            |     |            |
| 31 | Santos <sup>14</sup>          | 11 (61.1) | 7 (38.9)  | 75 (29.8)  | 177 (70.2) | Yes | Sequencing |
| 32 |                               |           |           |            |            |     |            |
| 33 |                               |           |           |            |            |     |            |
| 34 | Shimizu <sup>39</sup>         | 4 (40.0)  | 6 (60.0)  | 1 (3.1)    | 31 (96.9)  | No  | PCR-RFLP   |
| 35 |                               |           |           |            |            |     |            |
| 36 | Singla <sup>17</sup>          | 15 (88.2) | 2 (11.8)  | 213 (54.5) | 178 (45.5) | No  | PCR-RFLP   |
| 37 |                               |           |           |            |            |     |            |
| 38 |                               |           |           |            |            |     |            |
| 39 |                               |           |           |            |            |     |            |
| 40 |                               |           |           |            |            |     |            |
| 41 |                               |           |           |            |            |     |            |
| 42 |                               |           |           |            |            |     |            |
| 43 |                               |           |           |            |            |     |            |
| 44 |                               |           |           |            |            |     |            |
| 45 |                               |           |           |            |            |     |            |
| 46 |                               |           |           |            |            |     |            |

1  
2  
3  
4  
5  
6  
7  
8  
9  
10  
11  
12  
13  
14  
15  
16  
17  
18  
19  
20  
21  
22  
23  
24  
25  
26  
27  
28  
29  
30  
31  
32  
33  
34  
35  
36  
37  
38  
39  
40  
41  
42  
43  
44  
45  
46

|                                  |           |           |            |             |     |                                         |
|----------------------------------|-----------|-----------|------------|-------------|-----|-----------------------------------------|
| Sotsuka <sup>18</sup>            | 8 (15.4)  | 44 (84.6) | 5 (5.4)    | 87 (94.6)   | No  | PCR-RFLP                                |
| Teixeira <sup>21</sup>           | 18 (75.0) | 6 (25.0)  | 64 (51.2)  | 61 (48.8)   | Yes | Sequencing                              |
| Vuilleumier <sup>22</sup>        | 3 (37.5)  | 5 (62.5)  | 8 (12.7)   | 55 (87.3)   | Yes | PCR- RFLP                               |
| Xiang <sup>24</sup>              | 28 (31.5) | 61 (68.5) | 501 (23.2) | 1654 (76.8) | Yes | PCR/ligase detection<br>reaction assays |
| Yamada <sup>25</sup>             | 14 (60.9) | 9 (39.1)  | 64 (43.5)  | 83 (56.5)   | Yes | Sequencing                              |
| Yimer <sup>40</sup>              | 31 (75.6) | 10 (24.4) | 107 (66.9) | 53 (33.1)   | Yes | Taqman                                  |
| Yuliwulandari <sup>41</sup>      | 32 (64.0) | 18 (36.0) | 65 (34.0)  | 126 (66.0)  | Yes | Sequencing                              |
| Zaverucha-do-Valle <sup>26</sup> | 37 (71.2) | 15 (28.8) | 36 (45.6)  | 43 (54.4)   | Yes | Sequencing                              |

Abbreviations: *HWE*, Hardy-Weinberg equilibrium; *NA*, not available; *PCR*, polymerase chain reaction; *RFLP*, restriction fragment length polymorphism

**S3 Table. Genotype distribution, the achievement of Hardy-Weinberg equilibrium (HWE), and the genotyping method used for *GST* in the included studies (n = 19)**

| Study                      | <i>GSTMI</i> genotype (n = 19)   |              |                                     |               | <i>GSTT1</i> genotype (n = 17)   |              |                                     |               | <i>GSTMI/GSTT1</i> genotype (n = 11) |               |                                     |               | HWE <sup>a</sup> | Genotyping method |
|----------------------------|----------------------------------|--------------|-------------------------------------|---------------|----------------------------------|--------------|-------------------------------------|---------------|--------------------------------------|---------------|-------------------------------------|---------------|------------------|-------------------|
|                            | Case (number of individuals [%]) |              | Control (number of individuals [%]) |               | Case (number of individuals [%]) |              | Control (number of individuals [%]) |               | Case (number of individuals [%])     |               | Control (number of individuals [%]) |               |                  |                   |
|                            | Null                             | Non-null     | Null                                | Non-null      | Null                             | Non-null     | Null                                | Non-null      | Dual-null                            | One-/non-null | Dual-null                           | One-/non-null |                  |                   |
| Brito <sup>3</sup>         | 6<br>(40.0)                      | 9<br>(60.0)  | 99<br>(43.0)                        | 131<br>(57.0) | 2<br>(13.3)                      | 13<br>(86.7) | 28<br>(12.2)                        | 202<br>(87.8) | 1<br>(6.7)                           | 14<br>(93.3)  | 12<br>(5.2)                         | 218<br>(94.8) | No               | PCR               |
| Chatterjee <sup>e 42</sup> | 25<br>(49.0)                     | 26<br>(51.0) | 49<br>(49.0)                        | 51<br>(51.0)  | 3<br>(5.9)                       | 48<br>(94.1) | 3<br>(3.0)                          | 97<br>(97.0)  | 3<br>(5.9)                           | 48<br>(94.1)  | 11<br>(11.0)                        | 89<br>(89.0)  | No               | Multiplex<br>PCR  |
| Forestier <sup>o 7</sup>   | 25<br>(42.4)                     | 34<br>(57.6) | 21<br>(52.5)                        | 19<br>(47.5)  | 10<br>(17.0)                     | 49<br>(83.0) | 8<br>(20.0)                         | 32<br>(80.0)  | 4<br>(6.8)                           | 55<br>(93.2)  | 5<br>(12.5)                         | 35<br>(87.5)  | Yes              | Multiplex<br>PCR  |
| Gupta <sup>43</sup>        | 21<br>(42.0)                     | 29<br>(58.0) | 61<br>(24.8)                        | 185<br>(75.2) | 11<br>(22.0)                     | 39<br>(78.0) | 30<br>(12.2)                        | 216<br>(87.8) | 5<br>(10.0)                          | 45<br>(90.0)  | 4<br>(1.6)                          | 242<br>(98.4) | No               | Multiplex<br>PCR  |
| Huang <sup>44</sup>        | 42<br>(66.7)                     | 21<br>(33.3) | 29<br>(46.0)                        | 34<br>(54.0)  | 24<br>(38.1)                     | 39<br>(61.9) | 25<br>(39.7)                        | 38<br>(60.3)  | NA                                   | NA            | NA                                  | NA            | Yes              | Multiplex<br>PCR  |
| Kim <sup>45</sup>          | 26<br>(45.6)                     | 31<br>(54.4) | 104<br>(54.7)                       | 86<br>(45.3)  | 34<br>(59.6)                     | 23<br>(40.4) | 103<br>(54.2)                       | 87<br>(45.8)  | 17<br>(29.8)                         | 40<br>(70.2)  | 56<br>(29.6)                        | 133<br>(70.4) | No               | PCR               |
| Leiro <sup>46</sup>        | 12<br>(34.3)                     | 23<br>(65.7) | 25<br>(41.7)                        | 35<br>(58.3)  | 17<br>(48.6)                     | 18<br>(51.4) | 16<br>(26.7)                        | 44<br>(73.3)  | 7<br>(20.0)                          | 28<br>(80.0)  | 6<br>(10.0)                         | 54<br>(90.0)  | No               | PCR               |
| Liu <sup>47</sup>          | 14<br>(70.0)                     | 6<br>(30.0)  | 96<br>(67.1)                        | 47<br>(32.9)  | 13<br>(65.0)                     | 7<br>(35.0)  | 97<br>(67.8)                        | 46<br>(32.2)  | NA                                   | NA            | NA                                  | NA            | No               | Multiplex<br>PCR  |



1  
2  
3  
4  
5  
6  
7  
8  
9  
10  
11  
12  
13  
14  
15  
16  
17  
18  
19  
20  
21  
22  
23  
24  
25  
26  
27  
28  
29  
30  
31  
32  
33  
34  
35  
36  
37  
38  
39  
40  
41  
42  
43  
44  
45  
46

|                        |              |              |               |                |              |              |               |                |              |              |               |                |     |                  |
|------------------------|--------------|--------------|---------------|----------------|--------------|--------------|---------------|----------------|--------------|--------------|---------------|----------------|-----|------------------|
| Monteiro <sup>48</sup> | 21<br>(35.6) | 38<br>(64.4) | 34<br>(28.8)  | 84<br>(71.2)   | 11<br>(18.7) | 48<br>(81.3) | 28<br>(23.8)  | 90<br>(76.2)   | NA           | NA           | NA            | NA             | No  | PCR              |
| Rana <sup>49</sup>     | 10<br>(41.6) | 20<br>(58.4) | 37<br>(18.5)  | 183<br>(81.5)  | 6<br>(25.0)  | 24<br>(75.0) | 68<br>(33.8)  | 152<br>(66.2)  | 9<br>(37.5)  | 21<br>(62.5) | 96<br>(47.7)  | 124<br>(52.3)  | No  | PCR              |
| Rana <sup>13</sup>     | 19<br>(34.5) | 36<br>(65.5) | 42<br>(17.1)  | 203<br>(82.9)  | 14<br>(25.5) | 41<br>(74.5) | 81<br>(33.1)  | 164<br>(66.9)  | 22<br>(40.0) | 33<br>(60.0) | 122<br>(49.8) | 123<br>(50.2)  | Yes | PCR              |
| Roy <sup>50</sup>      | 17<br>(52.0) | 15<br>(48.0) | 8<br>(24.0)   | 25<br>(76.0)   | 5<br>(15.0)  | 28<br>(85.0) | 1<br>(3.0)    | 32<br>(97.0)   | NA           | NA           | NA            | NA             | No  | PCR              |
| Sharma <sup>15</sup>   | 42<br>(40.0) | 63<br>(60.0) | 68<br>(36.7)  | 117<br>(63.3)  | NA           | NA           | NA            | NA             | NA           | NA           | NA            | NA             | No  | PCR              |
| Singla <sup>17</sup>   | 10<br>(59.0) | 7<br>(41.0)  | 165<br>(42.0) | 226<br>(58.0)  | 8<br>(47.0)  | 9<br>(53.0)  | 102<br>(26.0) | 289<br>(74.0)  | 5<br>(29.0)  | 12<br>(71.0) | 32<br>(8.0)   | 359<br>(92.0)  | No  | Multiplex<br>PCR |
| Sotsuka <sup>18</sup>  | 12<br>(60.0) | 8<br>(40.0)  | 50<br>(54.3)  | 42<br>(45.7)   | 7<br>(35.0)  | 13<br>(65.0) | 40<br>(43.5)  | 52<br>(56.5)   | NA           | NA           | NA            | NA             | No  | PCR              |
| Tang <sup>19</sup>     | 55<br>(61.8) | 34<br>(38.2) | 203<br>(57.0) | 153<br>(43.0)  | 40<br>(44.9) | 49<br>(55.1) | 164<br>(46.1) | 192<br>(53.9)  | 22<br>(24.7) | 67<br>(75.3) | 94<br>(26.4)  | 262<br>(73.6)  | Yes | Multiplex<br>PCR |
| Teixeira <sup>21</sup> | 11<br>(42.3) | 15<br>(41.7) | 61<br>(43.3)  | 80<br>(56.7)   | 4<br>(15.4)  | 22<br>(84.6) | 27<br>(19.2)  | 114<br>(80.8)  | NA           | NA           | NA            | NA             | Yes | Multiplex<br>PCR |
| Wang <sup>23</sup>     | 63<br>(60.6) | 41<br>(39.4) | 54<br>(48.6)  | 57<br>(51.4)   | NA           | NA           | NA            | NA             | NA           | NA           | NA            | NA             | No  | PCR              |
| Xiang <sup>24</sup>    | 41<br>(46.1) | 48<br>(53.9) | 925<br>(42.9) | 1230<br>(57.1) | 18<br>(20.2) | 71<br>(79.8) | 477<br>(22.1) | 1678<br>(77.9) | 7<br>(9.3)   | 68<br>(90.7) | 283<br>(16.5) | 1427<br>(83.5) | Yes | PCR              |

Abbreviations: *HWE*, Hardy-Weinberg equilibrium; *NA*, not available; *PCR*, polymerase chain reaction

<sup>a</sup> HWE tested for *GSTM1*, *GSTT1*, and *GSTM1/GSTT1* genotypes simultaneously

**S4 Table. Genotype distribution, the achievement of Hardy-Weinberg equilibrium (HWE), and the genotyping method used for *SLCO1B1* in the included studies (n = 4)**

| Study               | <i>SLCO1B1</i> 388A>G (rs2306283) |            |                                     |            | <i>SLCO1B1</i> 521T>C (rs4149056) |            |                                     |            | HWE <sup>a</sup> | Genotyping method     |
|---------------------|-----------------------------------|------------|-------------------------------------|------------|-----------------------------------|------------|-------------------------------------|------------|------------------|-----------------------|
|                     | Case (number of individuals [%])  |            | Control (number of individuals [%]) |            | Case (number of individuals [%])  |            | Control (number of individuals [%]) |            |                  |                       |
|                     | AA                                | AG + GG    | AA                                  | AG + GG    | CC                                | TC + TT    | CC                                  | TC + TT    |                  |                       |
| Chen <sup>51</sup>  | 8 (9.0)                           | 81 (91.0)  | 33 (55.4)                           | 409 (44.6) | 2 (2.2)                           | 87 (97.8)  | 3 (0.7)                             | 438 (99.3) | Yes              | Taqman                |
| Kim <sup>52</sup>   | 6 (9.2)                           | 59 (90.8)  | 11 (54.5)                           | 145 (45.5) | 0 (0.0)                           | 66 (100.0) | 3 (1.9)                             | 153 (98.1) | Yes              | SNPstream             |
| Li <sup>53</sup>    | 11 (9.3)                          | 107 (90.7) | 12 (61.3)                           | 143 (38.7) | 1 (0.8)                           | 117 (99.2) | 1 (0.6)                             | 154 (99.4) | Yes              | PCR direct sequencing |
| Yimer <sup>40</sup> | 9 (22.0)                          | 32 (78.0)  | 20 (33.1)                           | 140 (66.9) | 1 (2.4)                           | 40 (97.6)  | 4 (2.5)                             | 156 (97.5) | Yes              | Taqman                |

Abbreviations: **HWE**, Hardy-Weinberg equilibrium; **PCR**, polymerase chain reaction; **SNP**, single nucleotide polymorphism

<sup>a</sup> HWE tested for *SLCO1B1* 388A>G and *SLCO1B1* 521T>C genotypes simultaneously

1  
2  
3 **(A) CYP2E1 RsaI/PstI polymorphism**  
4  
5

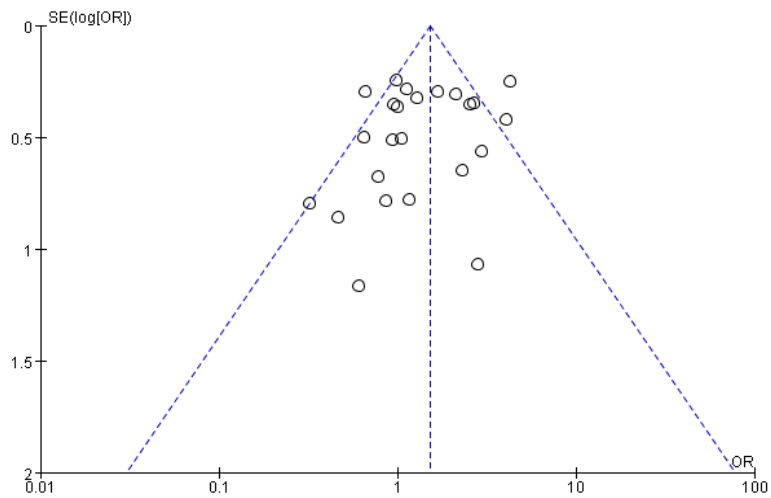

22 **(B) CYP2E1 DraI polymorphism**  
23  
24

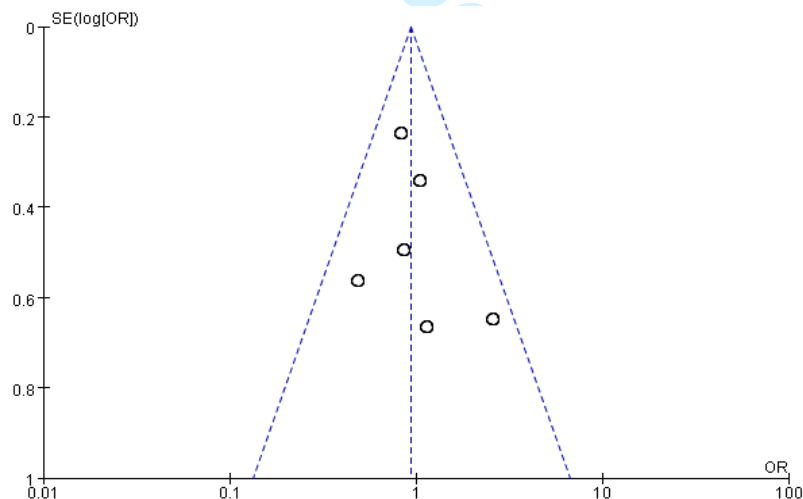

42 **(C) NAT2 polymorphism**  
43  
44

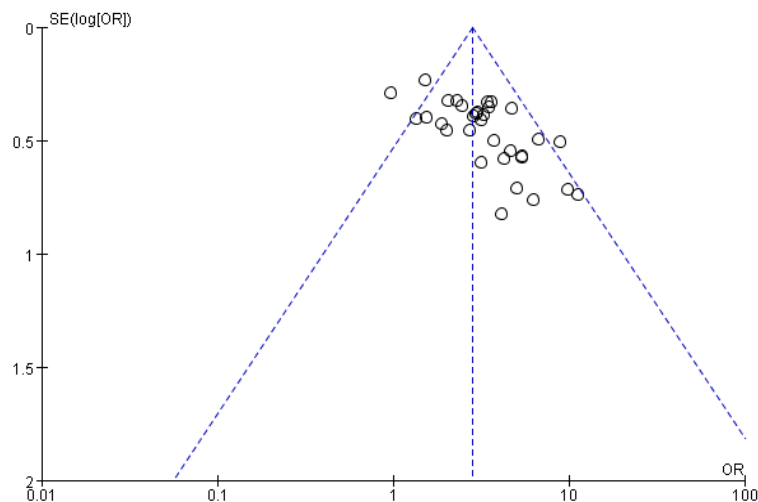

1  
2  
3  
4  
5  
6  
7  
8  
9  
10  
11  
12  
13  
14  
15  
16  
17  
18  
19  
20  
21  
22  
23  
24  
25  
26  
27  
28  
29  
30  
31  
32  
33  
34  
35  
36  
37  
38  
39  
40  
41  
42  
43  
44  
45  
46  
47  
48  
49  
50  
51  
52  
53  
54  
55  
56  
57  
58  
59  
60

**(D) *GSTM1* polymorphism**

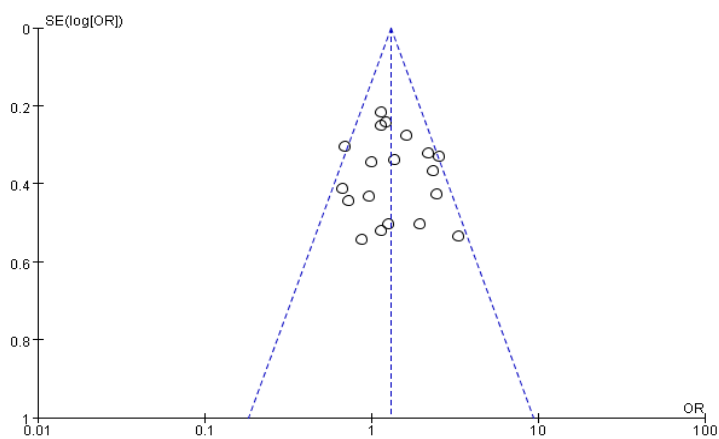

**(E) *GSTT1* polymorphism**

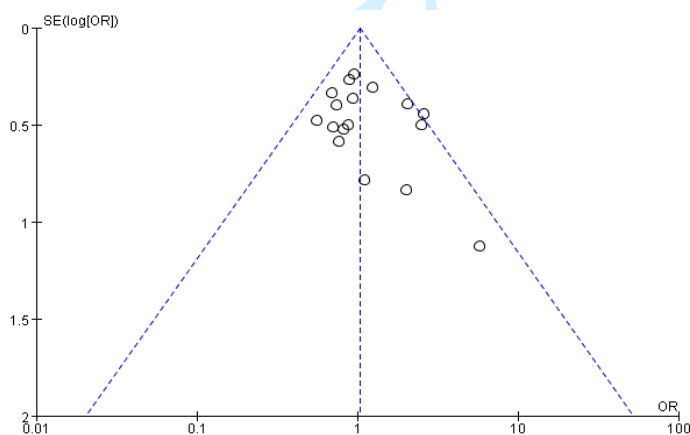

**(F) *GSTT1/M1* polymorphism**

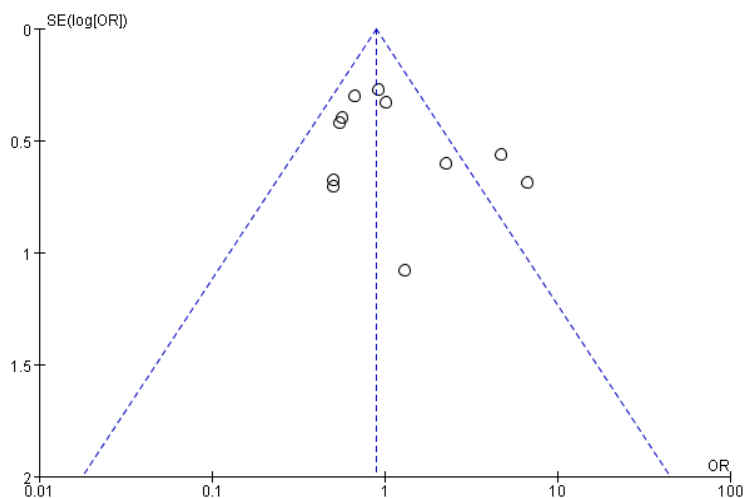

1  
2  
3 **(G) *SLCO1B1* 388A>G and 521T>C polymorphism**  
4

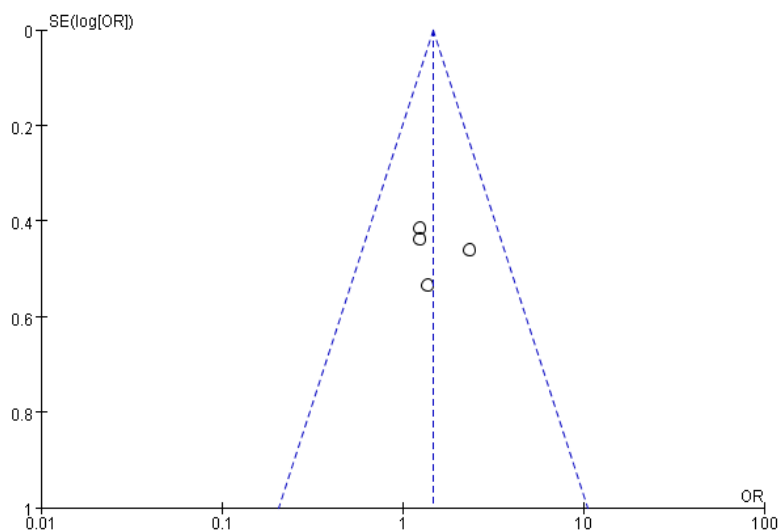

**S5 Figure.** Funnel plots to evaluate publication bias for the *CYP2E1*, *NAT2*, *GST*, and *SLCO1B1* polymorphisms associated with the ATDILI risk. (A) *CYP2E1* *RsaI/PstI* polymorphism, (B) *CYP2E1* *DraI* polymorphism, (C) *NAT2* polymorphism, (D) *GSTM1* polymorphism, (E) *GSTT1* polymorphism, (F) *GSTT1/MI* polymorphism, and (G) *SLCO1B1* 388A>G and 521T>C polymorphism.

**S6 Table. Subgroup analysis for the association between *CYP2E1* polymorphisms and ATDILI risk**

| Polymorphic gene                                              | Subgroup                      | Number of studies | Case/control (n) | Test of association |                      | Model of meta-analysis | Test of heterogeneity |                      |         |
|---------------------------------------------------------------|-------------------------------|-------------------|------------------|---------------------|----------------------|------------------------|-----------------------|----------------------|---------|
|                                                               |                               |                   |                  | OR [95% CI]         | P value <sup>a</sup> |                        | I <sup>2</sup> , %    | P value <sup>b</sup> |         |
| <i>CYP2E1</i> <i>RsaI/PstI</i><br>(c1/c1 vs. c1/c2 + c2/c2)   | Total                         | 24                | 1293/5450        | 1.39 [1.06, 1.83]   | 0.02                 | Random                 | 60                    | <0.0001              |         |
|                                                               | Ethnicity                     | East Asian        | 10               | 736/3076            | 1.62 [1.12, 2.36]    | 0.01                   | Random                | 69                   | 0.0006  |
|                                                               |                               | Indian            | 6                | 310/1295            | 1.08 [0.52, 2.25]    | 0.85                   | Random                | 70                   | 0.005   |
|                                                               |                               | South American    | 6                | 216/869             | 1.30 [0.83, 2.03]    | 0.25                   | Fixed                 | 0                    | 0.49    |
|                                                               |                               | Others            | 2                | 31/210              | 0.98 [0.39, 2.45]    | 0.96                   | Fixed                 | 0                    | 0.66    |
|                                                               | Anti-TB drug regimen          | INH alone         | 2                | 31/210              | 0.98 [0.39, 2.45]    | 0.96                   | Fixed                 | 0                    | 0.66    |
|                                                               |                               | Combination       | 21               | 1212/5104           | 1.35 [1.01, 1.79]    | <0.00001               | Random                | 61                   | 0.0002  |
|                                                               | HWE test                      | HWE achieved      | 13               | 839/3570            | 1.67 [1.19, 2.34]    | 0.002                  | Random                | 58                   | 0.004   |
|                                                               | Diagnostic criteria of ATDILI | ALT > 2 × ULN     | 15               | 981/4701            | 1.54 [1.08, 2.18]    | 0.02                   | Random                | 70                   | <0.0001 |
|                                                               |                               | ALT > 3-5 × ULN   | 9                | 331/1034            | 1.11 [0.80, 1.54]    | 0.52                   | Fixed                 | 0                    | 0.52    |
|                                                               | Genotyping method             | PCR-RELP          | 17               | 782/4194            | 1.24 [0.91, 1.70]    | 0.18                   | Random                | 46                   | 0.02    |
|                                                               |                               | Sequencing        | 3                | 292/394             | 2.03 [0.87, 4.71]    | 0.10                   | Random                | 80                   | 0.007   |
|                                                               |                               | Taqman            | 3                | 152/703             | 1.09 [0.74, 1.58]    | 0.67                   | Fixed                 | 0                    | 0.47    |
| <i>CYP2E1</i> <i>DraI</i> <sup>c</sup><br>(D/D vs. D/C + C/C) | Total                         | 6                 | 233/1272         | 0.93 [0.68, 1.27]   | 0.64                 | Fixed                  | 0                     | 0.51                 |         |
|                                                               | Ethnicity                     | East Asian        | 2                | 109/448             | 0.84 [0.55, 1.28]    | 0.41                   | Fixed                 | 0                    | 0.96    |
|                                                               |                               | Indian            | 2                | 91/342              | 0.83 [0.48, 1.45]    | 0.51                   | Fixed                 | 27                   | 0.24    |
|                                                               |                               | South American    | 2                | 33/482              | 1.80 [0.73, 4.45]    | 0.20                   | Fixed                 | 0                    | 0.37    |

1  
2  
3  
4  
5  
6  
7  
8  
9  
10  
11  
12  
13  
14  
15  
16  
17  
18  
19  
20  
21  
22  
23  
24  
25  
26  
27  
28  
29  
30  
31  
32  
33  
34  
35  
36  
37  
38  
39  
40  
41  
42  
43  
44  
45  
46

|                               |                 |   |          |                   |      |       |    |      |
|-------------------------------|-----------------|---|----------|-------------------|------|-------|----|------|
| HWE test                      | HWE achieved    | 5 | 116/701  | 1.00 [0.72, 1.38] | 0.98 | Fixed | 0  | 0.57 |
| Diagnostic criteria of ATDILI | ALT > 2 × ULN   | 3 | 108/698  | 0.83 [0.58, 1.19] | 0.32 | Fixed | 0  | 0.51 |
|                               | ALT > 3-5 × ULN | 3 | 53/574   | 1.31 [0.69, 2.48] | 0.41 | Fixed | 0  | 0.39 |
| Genotyping method             | PCR-RELP        | 5 | 215/1020 | 0.85 [0.62, 1.18] | 0.33 | Fixed | 0  | 0.82 |
|                               | Taqman          | 1 | 18/252   | 2.59 [0.73, 9.19] | 0.14 | NA    | NA | NA   |

---

Abbreviations: *ALT*, alanine aminotransferase; *ATDILI*, anti-tuberculosis drug-induced liver injury; *CI*, confidence interval; *CYP2E1*, cytochrome P450 2E1; *HWE*, Hardy-Weinberg equilibrium; *INH*, isoniazid; *NA*, not applicable; *OR*, odds ratio; *PCR-RFLP*, polymerase chain reaction-restriction fragment length polymorphism; *TB*, tuberculosis; *ULN*, upper limit of normal

- <sup>a</sup> P value from Z test
- <sup>b</sup> P value from Cochran’s Q test based on chi-square statistic
- <sup>c</sup> Subgroup analysis based on anti-TB drug regimen could not be performed due to insufficient information provided.

**S7 Table. Subgroup analysis for the association between *NAT2* polymorphism and ATDILI risk**Abbreviations: *ALT*, alanine aminotransferase; *ATDILI*, anti-tuberculosis drug-induced liver injury; *CI*, confidence interval; *HWE*, Hardy-Weinberg equilibrium; *INH*,

| Polymorphic gene                                                      | Subgroup                      | Number of studies    | Case/control (n) | Test of association |                      | Model of meta-analysis | Test of heterogeneity |                      |         |
|-----------------------------------------------------------------------|-------------------------------|----------------------|------------------|---------------------|----------------------|------------------------|-----------------------|----------------------|---------|
|                                                                       |                               |                      |                  | OR [95% CI]         | P value <sup>a</sup> |                        | I <sup>2</sup> , %    | P value <sup>b</sup> |         |
| <i>NAT2</i><br>(Slow acetylator vs. fast and intermediate acetylator) | Total                         | 34                   | 1270/7234        | 3.11 [2.53, 3.82]   | <0.00001             | Random                 | 47                    | 0.002                |         |
|                                                                       | Ethnicity                     | East Asian           | 12               | 537/3885            | 3.48 [2.16, 5.60]    | <0.00001               | Random                | 71                   | <0.0001 |
|                                                                       |                               | Indian               | 6                | 246/1352            | 3.07 [2.26, 4.16]    | <0.00001               | Fixed                 | 0                    | 0.74    |
|                                                                       |                               | West Asian           | 2                | 44/106              | 9.51 [4.19, 21.61]   | <0.00001               | Fixed                 | 0                    | 0.79    |
|                                                                       |                               | South American       | 7                | 231/1110            | 2.94 [2.11, 4.08]    | <0.00001               | Fixed                 | 0                    | 0.75    |
|                                                                       |                               | African              | 2                | 55/212              | 2.08 [1.06, 4.10]    | 0.03                   | Fixed                 | 52                   | 0.15    |
|                                                                       |                               | Others               | 5                | 157/569             | 2.56 [1.72, 3.79]    | <0.00001               | Fixed                 | 15                   | 0.32    |
|                                                                       |                               | Anti-TB drug regimen | INH alone        | 2                   | 31/210               | 2.32 [1.05, 5.13]      | 0.04                  | Fixed                | 0       |
|                                                                       |                               | Combination          | 31               | 591/1894            | 3.16 [2.52, 3.95]    | <0.00001               | Random                | 51                   | 0.0007  |
|                                                                       | HWE test                      | HWE achieved         | 21               | 848/5206            | 2.92 [2.21, 3.85]    | <0.00001               | Random                | 55                   | 0.001   |
|                                                                       | Diagnostic criteria of ATDILI | ALT > 2 × ULN        | 20               | 859/5272            | 2.90 [2.21, 3.81]    | <0.00001               | Random                | 55                   | 0.002   |
|                                                                       |                               | ALT > 3-5 × ULN      | 14               | 411/1692            | 3.30 [2.56, 4.27]    | <0.00001               | Fixed                 | 26                   | 0.18    |
|                                                                       | Genotyping method             | PCR-RELP             | 23               | 792/3476            | 3.23 [2.44, 4.26]    | <0.00001               | Random                | 50                   | 0.003   |
|                                                                       |                               | Sequencing           | 7                | 284/1019            | 3.45 [2.52, 4.71]    | <0.00001               | Fixed                 | 0                    | 0.70    |
| Others                                                                |                               | 4                    | 194/2739         | 2.47 [1.31, 4.67]   | 0.005                | Random                 | 68                    | 0.02                 |         |

isoniazid; *NAT2*, N-acetyltransferase 2; *OR*, odds ratio; *PCR-RFLP*, polymerase chain reaction-restriction fragment length polymorphism; *TB*, tuberculosis; *ULN*, upper limit of normal<sup>a</sup> P value from Z test<sup>b</sup> P value from Cochran's Q test based on chi-square statistic



S8 Table. Subgroup analysis for the association between GST polymorphisms and ATDILI risk

| Polymorphic gene                                                 | Subgroup                      | Number of studies | Case/control (n) | Test of association |                      | Model of meta-analysis | Test of heterogeneity |                      |        |
|------------------------------------------------------------------|-------------------------------|-------------------|------------------|---------------------|----------------------|------------------------|-----------------------|----------------------|--------|
|                                                                  |                               |                   |                  | OR [95% CI]         | P value <sup>a</sup> |                        | I <sup>2</sup> , %    | P value <sup>b</sup> |        |
| <i>GSTM1</i> <sup>c</sup><br>(null vs. non-null)                 | Total                         | 19                | 977/5119         | 1.30 [1.12, 1.52]   | 0.0007               | Fixed                  | 33                    | 0.08                 |        |
|                                                                  | Ethnicity                     | East Asian        | 7                | 442/3110            | 1.23 [0.99, 1.54]    | 0.06                   | Fixed                 | 23                   | 0.25   |
|                                                                  |                               | Indian            | 7                | 341/1420            | 1.68 [1.30, 2.19]    | <0.0001                | Fixed                 | 36                   | 0.15   |
|                                                                  |                               | Brazilian         | 4                | 159/529             | 0.98 [0.66, 1.47]    | 0.94                   | Fixed                 | 0                    | 0.60   |
|                                                                  | HWE test                      | HWE achieved      | 6                | 381/3000            | 1.34 [0.93, 1.93]    | 0.12                   | Random                | 52                   | 0.07   |
|                                                                  | Diagnostic criteria of ATDILI | ALT > 2 × ULN     | 10               | 546/4018            | 1.56 [1.28, 1.91]    | <0.0001                | Fixed                 | 13                   | 0.32   |
| ALT > 3-5 × ULN                                                  |                               | 9                 | 431/1101         | 1.01 [0.80, 1.29]   | 0.91                 | Fixed                  | 10                    | 0.35                 |        |
| <i>GSTT1</i> <sup>c</sup><br>(null vs. non-null)                 | Total                         | 17                | 768/4823         | 1.03 [0.85, 1.25]   | 0.76                 | Fixed                  | 16                    | 0.26                 |        |
|                                                                  | Ethnicity                     | East Asian        | 6                | 338/2999            | 0.96 [0.74, 1.24]    | 0.75                   | Fixed                 | 0                    | 0.94   |
|                                                                  |                               | Indian            | 6                | 236/1235            | 1.37 [0.72, 2.59]    | 0.33                   | Random                | 57                   | 0.04   |
|                                                                  |                               | Brazilian         | 4                | 159/529             | 0.80 [0.47, 1.33]    | 0.39                   | Fixed                 | 0                    | 0.97   |
|                                                                  | HWE test                      | HWE achieved      | 6                | 381/3000            | 0.87 [0.66, 1.13]    | 0.29                   | Fixed                 | 0                    | 0.98   |
|                                                                  | Diagnostic criteria of ATDILI | ALT > 2 × ULN     | 9                | 442/3907            | 0.97 [0.77, 1.24]    | 0.83                   | Fixed                 | 37                   | 0.13   |
| ALT > 3-5 × ULN                                                  |                               | 8                 | 101/250          | 1.14 [0.83, 1.57]   | 0.42                 | Fixed                  | 0                     | 0.54                 |        |
| <i>GSTM1/GSTT1</i> <sup>c</sup><br>(dual-null vs. one-/non-null) | Total                         | 11                | 547/4233         | 1.05 [0.67, 1.62]   | 0.84                 | Random                 | 59                    | 0.006                |        |
|                                                                  | Ethnicity                     | East Asian        | 3                | 235/2701            | 0.83 [0.58, 1.20]    | 0.33                   | Fixed                 | 0                    | 0.49   |
|                                                                  |                               | Indian            | 5                | 203/1202            | 1.33 [0.50, 3.53]    | 0.56                   | Random                | 80                   | 0.0005 |
|                                                                  |                               | Brazilian         | 2                | 74/270              | 0.67 [0.20, 2.18]    | 0.50                   | Fixed                 | 0                    | 0.47   |
|                                                                  | HWE test                      | HWE achieved      | 4                | 55/504              | 0.72 [0.51, 1.01]    | 0.06                   | Fixed                 | 0                    | 0.70   |
|                                                                  | Diagnostic criteria of ATDILI | ALT > 2 × ULN     | 6                | 330/3613            | 1.16 [0.60, 2.24]    | 0.67                   | Random                | 76                   | 0.0009 |

|   |        |             |   |         |                   |      |       |   |      |
|---|--------|-------------|---|---------|-------------------|------|-------|---|------|
| 1 |        |             |   |         |                   |      |       |   |      |
| 2 |        |             |   |         |                   |      |       |   |      |
| 3 | ATDILI | ALT > 3-5 × | 5 | 217/620 | 0.97 [0.61, 1.55] | 0.90 | Fixed | 0 | 0.43 |
| 4 |        | ULN         |   |         |                   |      |       |   |      |

5 Abbreviations: *ALT*, alanine aminotransferase; *ATDILI*, anti-tuberculosis drug-induced liver injury; *CI*, confidence interval; *GSTMI*, glutathione S-transferase Mu 1;  
6 *GSTTI*, glutathione S-transferase Theta 1; *HWE*, Hardy-Weinberg equilibrium; *OR*, odds ratio; *PCR-RFLP*, polymerase chain reaction-restriction fragment length  
7 polymorphism; *ULN*, upper limit of normal

8 <sup>a</sup> P value from Z test

9 <sup>b</sup> P value from Cochran's Q test based on chi-square statistic

10 <sup>c</sup> Subgroup analyses based on anti-tuberculosis drug regimen and genotyping method could not be performed due to insufficient information available

S9 Table. Subgroup analysis for the association between *SLCO1B1* polymorphisms and ATDILI risk

| Polymorphic gene                                                      | Subgroup                      | Number of studies | Case/Control (n) | Test of association |                      | Model of meta-analysis | Test of heterogeneity |                      |
|-----------------------------------------------------------------------|-------------------------------|-------------------|------------------|---------------------|----------------------|------------------------|-----------------------|----------------------|
|                                                                       |                               |                   |                  | OR [95% CI]         | P value <sup>a</sup> |                        | I <sup>2</sup> , %    | P value <sup>b</sup> |
| <i>SLCO1B1</i> 388A>G <sup>c</sup><br>(rs2306283)<br>(AA vs. AG + GG) | Total                         | 4                 | 279/837          | 1.47 [0.94, 2.29]   | 0.09                 | Fixed                  | 0                     | 0.72                 |
|                                                                       | Ethnicity                     |                   |                  |                     |                      |                        |                       |                      |
|                                                                       | East Asian                    | 3                 | 274/670          | 1.28 [0.77, 2.14]   | 0.35                 | Fixed                  | 0                     | 0.99                 |
|                                                                       | Anti-TB drug regimen          |                   |                  |                     |                      |                        |                       |                      |
|                                                                       | Combination                   | 3                 | 195/758          | 1.57 [0.93, 2.63]   | 0.09                 | Fixed                  | 0                     | 0.57                 |
|                                                                       | Diagnostic criteria of ATDILI |                   |                  |                     |                      |                        |                       |                      |
|                                                                       | ALT > 2 × ULN                 | 3                 | 195/758          | 1.57 [0.93, 2.63]   | 0.09                 | Fixed                  | 0                     | 0.57                 |
|                                                                       | Genotyping method             |                   |                  |                     |                      |                        |                       |                      |
|                                                                       | Taqman                        | 2                 | 130/602          | 1.64 [0.90, 2.97]   | 0.11                 | Fixed                  | 4                     | 0.31                 |
|                                                                       | Others                        | 2                 | 183/311          | 1.30 [0.67, 2.53]   | 0.44                 | Fixed                  | 0                     | 0.89                 |
| <i>SLCO1B1</i> 521T>C <sup>c</sup><br>(rs4149056)<br>(CC vs. TC + TT) | Total                         | 4                 | 310/901          | 1.21 [0.40, 3.63]   | 0.74                 | Fixed                  | 0                     | 0.56                 |
|                                                                       | Ethnicity                     |                   |                  |                     |                      |                        |                       |                      |
|                                                                       | East Asian                    | 3                 | 273/752          | 1.30 [0.36, 4.66]   | 0.68                 | Fixed                  | 0                     | 0.38                 |
|                                                                       | Anti-TB drug regimen          |                   |                  |                     |                      |                        |                       |                      |
|                                                                       | Combination                   | 3                 | 196/757          | 1.19 [0.36, 3.95]   | 0.78                 | Fixed                  | 4                     | 0.35                 |
|                                                                       | Diagnostic criteria of ATDILI |                   |                  |                     |                      |                        |                       |                      |
|                                                                       | ALT > 2 × ULN                 | 3                 | 196/757          | 1.19 [0.36, 3.95]   | 0.78                 | Fixed                  | 4                     | 0.35                 |
|                                                                       | Genotyping method             |                   |                  |                     |                      |                        |                       |                      |
|                                                                       | Taqman                        | 2                 | 130/601          | 1.90 [0.49, 7.40]   | 0.36                 | Fixed                  | 0                     | 0.39                 |
|                                                                       | Others                        | 2                 | 184/311          | 0.61 [0.09, 4.11]   | 0.61                 | Fixed                  | 0                     | 0.49                 |

Abbreviations: *ALT*, alanine aminotransferase; *ATDILI*, anti-tuberculosis drug-induced liver injury; *CI*, confidence interval; *OR*, odds ratio; *SLCO1B1*, solute carrier organic anion transporter family, member 1B1 (encoding organic anion transporting polypeptide 1B1 [OATP1B1]); *TB*, tuberculosis; *ULN*, upper limit of normal

1  
2  
3 <sup>a</sup> P value from Z test

4  
5 <sup>b</sup> P value from Cochran's Q test based on chi-square statistic

6  
7 <sup>c</sup> Subgroup analysis based on the achievement of Hardy-Weinberg equilibrium could not be performed due to insufficient information provided

8  
9  
10  
11  
12  
13  
14  
15  
16  
17  
18  
19  
20  
21  
22  
23  
24  
25  
26  
27  
28  
29  
30  
31  
32  
33  
34  
35  
36  
37  
38  
39  
40  
41  
42  
43  
44  
45  
46

For peer review only

## References

1. An HR, Wu XQ, Wang ZY *et al.* NAT2 and CYP2E1 polymorphisms associated with antituberculosis drug-induced hepatotoxicity in Chinese patients. *Clinical and Experimental Pharmacology and Physiology* 2012; **39**: 535-43.
2. Bose PD, Sarma MP, Medhi S *et al.* Role of polymorphic N-acetyl transferase2 and cytochrome P4502E1 gene in antituberculosis treatment-induced hepatitis. *J Gastroenterol Hepatol* 2011; **26**: 312-8.
3. Brito TC, Possuelo LG, Valim ARM *et al.* Polymorphisms in CYP2E1, GSTM1 and GSTT1 and anti-tuberculosis drug-induced hepatotoxicity. *Anais Da Academia Brasileira De Ciencias* 2014; **86**: 855-65.
4. Chamorro JG, Castagnino JP, Musella RM *et al.* Sex, ethnicity, and slow acetylator profile are the major causes of hepatotoxicity induced by antituberculosis drugs. *J Gastroenterol Hepatol* 2013; **28**: 323-8.
5. Cho HJ, Koh WJ, Ryu YJ *et al.* Genetic polymorphisms of NAT2 and CYP2E1 associated with antituberculosis drug-induced hepatotoxicity in Korean patients with pulmonary tuberculosis. *Tuberculosis* 2007; **87**: 551-6.
6. Feng FM, Guo M, Chen Y *et al.* Genetic polymorphisms in metabolic enzymes and susceptibility to anti-tuberculosis drug-induced hepatic injury. *Genetics and Molecular Research* 2014; **13**: 9463-71.
7. Forestiero FJ, Cecon L, Hirata MH *et al.* Relationship of NAT2, CYP2E1 and GSTM1/GSTT1 polymorphisms with mild elevation of liver enzymes in Brazilian individuals under anti-tuberculosis drug therapy. *Clinica Chimica Acta* 2013; **415**: 215-9.
8. Gupta VH, Amarapurkar DN, Singh M *et al.* Association of N-acetyltransferase 2 and cytochrome P450 2E1 gene polymorphisms with antituberculosis drug-induced hepatotoxicity in Western India. *J Gastroenterol Hepatol* 2013; **28**: 1368-74.

- 1  
2  
3 **9.** Huang YS, Chern HD, Su WJ *et al.* Cytochrome p450 2E1 genotype and the  
4 susceptibility to antituberculosis drug-induced hepatitis. *Hepatology* 2003; **37**: 924-30.  
5
- 6  
7 **10.** Kim SH, Kim SH, Bahn JW *et al.* Genetic polymorphisms of drug-metabolizing  
8 enzymes and anti-TB drug-induced hepatitis. *Pharmacogenomics* 2009; **10**: 1767-79.  
9
- 10  
11 **11.** Lee SW, Chung LS, Huang HH *et al.* NAT2 and CYP2E1 polymorphisms and  
12 susceptibility to first-line anti-tuberculosis drug-induced hepatitis. *Int J Tuberc Lung Dis*  
13 2010; **14**: 622-6.  
14
- 15  
16 **12.** Mishra S, Daschakraborty S, Shukla P *et al.* N-acetyltransferase and cytochrome  
17 P450 2E1 gene polymorphisms and susceptibility to antituberculosis drug hepatotoxicity in  
18 an Indian population. *National Medical Journal of India* 2013; **26**: 260-5.  
19
- 20  
21 **13.** Rana SV, Sharma SK, Ola RP *et al.* N-acetyltransferase 2, cytochrome P4502E1 and  
22 glutathione S-transferase genotypes in antitubercular treatment-induced hepatotoxicity in  
23 North Indians. *J Clin Pharm Ther* 2014; **39**: 91-6.  
24
- 25  
26 **14.** Santos NP, Callegari-Jacques SM, Ribeiro Dos Santos AK *et al.* N-acetyl transferase  
27 2 and cytochrome P450 2E1 genes and isoniazid-induced hepatotoxicity in Brazilian  
28 patients. *Int J Tuberc Lung Dis* 2013; **17**: 499-504.  
29
- 30  
31 **15.** Sharma SK, Jha BK, Sharma A *et al.* Genetic polymorphisms of CYP2E1 and  
32 GSTM1 loci and susceptibility to anti-tuberculosis drug-induced hepatotoxicity.  
33 *International Journal of Tuberculosis and Lung Disease* 2014; **18**: 588-93.  
34
- 35  
36 **16.** Singh M, Gupta VH, Amarapurkar DN *et al.* Association of genetic variants with  
37 anti-tuberculosis drug induced hepatotoxicity: A high resolution melting analysis. *Infection*  
38 *Genetics and Evolution* 2014; **23**: 42-8.  
39
- 40  
41 **17.** Singla N, Gupta D, Birbian N *et al.* Association of NAT2, GST and CYP2E1  
42 polymorphisms and anti-tuberculosis drug-induced hepatotoxicity. *Tuberculosis* 2014; **94**:  
43 293-8.  
44  
45  
46  
47  
48  
49  
50  
51  
52  
53  
54  
55  
56  
57  
58  
59  
60

- 1  
2  
3 **18.** Sotsuka T, Sasaki Y, Hirai S *et al.* Association of Isoniazid-metabolizing Enzyme  
4 Genotypes and Isoniazid-induced Hepatotoxicity in Tuberculosis Patients. *In Vivo* 2011;  
5 **25:** 803-12.  
6  
7  
8  
9  
10 **19.** Tang SW, Lv XZ, Zhang Y *et al.* CYP2E1, GSTM1 and GSTT1 genetic  
11 polymorphisms and susceptibility to antituberculosis drug-induced hepatotoxicity: a nested  
12 case-control study. *J Clin Pharm Ther* 2012; **37:** 588-93.  
13  
14  
15  
16 **20.** Tang S, Lv X, Zhang Y *et al.* Cytochrome P450 2E1 Gene  
17 Polymorphisms/Haplotypes and Anti-Tuberculosis Drug-Induced Hepatitis in a Chinese  
18 Cohort. *PLoS ONE* 2013; **8:** e57526.  
19  
20  
21  
22  
23 **21.** Teixeira RL, Morato RG, Cabello PH *et al.* Genetic polymorphisms of NAT2,  
24 CYP2E1 and GST enzymes and the occurrence of antituberculosis drug-induced hepatitis  
25 in Brazilian TB patients. *Mem Inst Oswaldo Cruz* 2011; **106:** 716-24.  
26  
27  
28  
29  
30 **22.** Vuilleumier N, Rossier MF, Chiappe A *et al.* CYP2E1 genotype and isoniazid-  
31 induced hepatotoxicity in patients treated for latent tuberculosis. *Eur J Clin Pharmacol*  
32 2006; **62:** 423-9.  
33  
34  
35  
36  
37 **23.** Wang T, Yu HT, Wang W *et al.* Genetic Polymorphisms of Cytochrome P450 and  
38 Glutathione S-transferase Associated with Antituberculosis Drug-induced Hepatotoxicity  
39 in Chinese Tuberculosis Patients. *Journal of International Medical Research* 2010; **38:**  
40 977-86.  
41  
42  
43  
44  
45  
46  
47 **24.** Xiang Y, Ma L, Wu WD *et al.* The Incidence of Liver Injury in Uyghur Patients  
48 Treated for TB in Xinjiang Uyghur Autonomous Region, China, and Its Association with  
49 Hepatic Enzyme Polymorphisms NAT2, CYP2E1, GSTM1 and GSTT1. *Plos One* 2014; **9:**  
50  
51  
52  
53 **25.** Yamada S, Tang M, Richardson K *et al.* Genetic variations of NAT2 and CYP2E1  
54 and isoniazid hepatotoxicity in a diverse population. *Pharmacogenomics* 2009; **10:** 1433-  
55 45.  
56  
57  
58  
59  
60

- 1  
2  
3 **26.** Zaverucha-do-Valle C, Monteiro SP, El-Jaick KB *et al.* The role of cigarette smoking  
4 and liver enzymes polymorphisms in anti-tuberculosis drug-induced hepatotoxicity in  
5 Brazilian patients. *Tuberculosis (Edinb)* 2014; **94**: 299-305.  
6  
7  
8  
9  
10 **27.** Ben Mahmoud L, Ghozzi H, Kamoun A *et al.* Polymorphism of the N-  
11 acetyltransferase 2 gene as a susceptibility risk factor for antituberculosis drug-induced  
12 hepatotoxicity in Tunisian patients with tuberculosis. *Pathologie Biologie* 2012; **60**: 324-  
13  
14  
15  
16  
17 30.  
18  
19 **28.** Bozok Cetintas V, Erer OF, Kosova B *et al.* Determining the relation between N-  
20 acetyltransferase-2 acetylator phenotype and antituberculosis drug induced hepatitis by  
21 molecular biologic tests. *Tuberk Toraks* 2008; **56**: 81-6.  
22  
23  
24  
25  
26 **29.** Higuchi N, Tahara N, Yanagihara K *et al.* NAT2 6A, a haplotype of the N-  
27 acetyltransferase 2 gene, is an important biomarker for risk of anti-tuberculosis drug-  
28 induced hepatotoxicity in Japanese patients with tuberculosis. *World J Gastroenterol* 2007;  
29  
30  
31  
32  
33 **13**: 6003-8.  
34  
35  
36 **30.** Ho HT, Wang TH, Hsiong CH *et al.* The NAT2 tag SNP rs1495741 correlates with  
37 the susceptibility of antituberculosis drug-induced hepatotoxicity. *Pharmacogenet*  
38  
39  
40  
41 *Genomics* 2013; **23**: 200-7.  
42  
43 **31.** Huang YS, Chern HD, Su WJ *et al.* Polymorphism of the N-acetyltransferase 2 gene  
44 as a susceptibility risk factor for antituberculosis drug-induced hepatitis. *Hepatology* 2002;  
45  
46  
47 **35**: 883-9.  
48  
49 **32.** Khalili H, Fouladdel S, Sistanizad M *et al.* Association of N-acetyltransferase-2  
50 genotypes and anti-tuberculosis induced liver injury: First case-controlled study from Iran.  
51  
52  
53  
54 *Curr Drug Saf* 2011; **6**: 17-22.  
55  
56 **33.** Leiro-Fernandez V, Valverde D, Vazquez-Gallardo R *et al.* N-acetyltransferase 2  
57 polymorphisms and risk of anti-tuberculosis drug-induced hepatotoxicity in Caucasians.  
58  
59  
60



- 1  
2  
3 *International Journal of Tuberculosis and Lung Disease* 2011; **15**: 1403-8.  
4  
5  
6 **34.** Lv X, Tang S, Xia Y *et al.* NAT2 genetic polymorphisms and anti-tuberculosis drug-  
7  
8 induced hepatotoxicity in Chinese community population. *Ann Hepatol* 2012; **11**: 700-7.  
9  
10 **35.** Ng CS, Hasnat A, Al Maruf A *et al.* N-acetyltransferase 2 (NAT2) genotype as a risk  
11  
12 factor for development of drug-induced liver injury relating to antituberculosis drug  
13  
14 treatment in a mixed-ethnicity patient group. *Eur J Clin Pharmacol* 2014; **70**: 1079-86.  
15  
16 **36.** Ohno M, Yamaguchi I, Yamamoto I *et al.* Slow N-acetyltransferase 2 genotype  
17  
18 affects the incidence of isoniazid and rifampicin-induced hepatotoxicity. *International*  
19  
20 *Journal of Tuberculosis and Lung Disease* 2000; **4**: 256-61.  
21  
22  
23 **37.** Possuelo LG, Castelan JA, de Brito TC *et al.* Association of slow N-acetyltransferase  
24  
25 2 profile and anti-TB drug-induced hepatotoxicity in patients from Southern Brazil. *Eur J*  
26  
27 *Clin Pharmacol* 2008; **64**: 673-81.  
28  
29  
30 **38.** Rana SV, Ola RP, Sharma SK *et al.* Comparison between acetylator phenotype and  
31  
32 genotype polymorphism of n-acetyltransferase-2 in tuberculosis patients. *Hepatology*  
33  
34 *International* 2012; **6**: 397-402.  
35  
36  
37 **39.** Shimizu Y, Dobashi K, Mita Y *et al.* DNA microarray genotyping of N-  
38  
39 acetyltransferase 2 polymorphism using carbodiimide as the linker for assessment of  
40  
41 isoniazid hepatotoxicity. *Tuberculosis* 2006; **86**: 374-81.  
42  
43  
44 **40.** Yimer G, Ueda N, Habtewold A *et al.* Pharmacogenetic & pharmacokinetic  
45  
46 biomarker for efavirenz based ARV and rifampicin based anti-TB drug induced liver injury  
47  
48 in TB-HIV infected patients. *PLoS One* 2011; **6**: e27810.  
49  
50  
51 **41.** Yuliwulandari R, Susilowati RW, Wicaksono BD *et al.* NAT2 variants are associated  
52  
53 with drug-induced liver injury caused by anti-tuberculosis drugs in Indonesian patients  
54  
55 with tuberculosis. *J Hum Genet* 2016.  
56  
57  
58 **42.** Chatterjee S, Lyle N, Mandal A *et al.* GSTT1 and GSTM1 gene deletions are not  
59  
60

1  
2  
3 associated with hepatotoxicity caused by antitubercular drugs. *J Clin Pharm Ther* 2010;  
4  
5 **35**: 465-70.

6  
7  
8 **43.** Gupta VH, Singh M, Amarpurkar DN *et al.* Association of GST null genotypes with  
9  
10 anti-tuberculosis drug induced hepatotoxicity in Western Indian population. *Ann Hepatol*  
11  
12 2013; **12**: 959-65.

13  
14  
15 **44.** Huang YS, Su WJ, Huang YH *et al.* Genetic polymorphisms of manganese  
16  
17 superoxide dismutase, NAD(P)H : quinone oxidoreductase, glutathione S-transferase M1  
18  
19 and T1, and the susceptibility to drug-induced liver injury. *J Hepatol* 2007; **47**: 128-34.

20  
21  
22 **45.** Kim SH, Kim SH, Yoon HJ *et al.* GSTT1 and GSTM1 null mutations and adverse  
23  
24 reactions induced by antituberculosis drugs in Koreans. *Tuberculosis* 2010; **90**: 39-43.

25  
26  
27 **46.** Leiro V, Fernandez-Villar A, Valverde D *et al.* Influence of glutathione S-transferase  
28  
29 M1 and T1 homozygous null mutations on the risk of antituberculosis drug-induced  
30  
31 hepatotoxicity in a Caucasian population. *Liver International* 2008; **28**: 835-9.

32  
33  
34 **47.** Liu F, Jiao AX, Wu XR *et al.* Impact of Glutathione S-Transferase M1 and T1 on  
35  
36 Anti-Tuberculosis Drug-Induced Hepatotoxicity in Chinese Pediatric Patients. *Plos One*  
37  
38 2014; **9**.

39  
40  
41 **48.** Monteiro TP, El-Jaick KB, Jeovanio-Silva AL *et al.* The roles of GSTM1 and GSTT1  
42  
43 null genotypes and other predictors in anti-tuberculosis drug-induced liver injury. *J Clin*  
44  
45 *Pharm Ther* 2012; **37**: 712-8.

46  
47  
48 **49.** Rana SV, Kamboj JK, Sharma SK *et al.* Antioxidant status and GST gene  
49  
50 polymorphisms in antitubercular treatment-induced hepatotoxicity patients. *Hepatol Int*  
51  
52 2013; **7**: 876-82.

53  
54  
55 **50.** Roy B, Chowdhury A, Kundu S *et al.* Increased risk of antituberculosis drug-induced  
56  
57 hepatotoxicity in individuals with glutathione S-transferase M1 'null' mutation. *J*  
58  
59 *Gastroenterol Hepatol* 2001; **16**: 1033-7.

- 1  
2  
3 **51.** Chen R, Wang J, Tang S *et al.* Association of polymorphisms in drug transporter  
4 genes (SLCO1B1 and SLC10A1) and anti-tuberculosis drug-induced hepatotoxicity in a  
5 Chinese cohort. *Tuberculosis* 2015; **95**: 68-74.  
6  
7  
8  
9  
10 **52.** Kim SH, Kim SH, Lee JH *et al.* Polymorphisms in drug transporter genes (ABCB1,  
11 SLCO1B1 and ABCC2) and hepatitis induced by antituberculosis drugs. *Tuberculosis*  
12 2012; **92**: 100-4.  
13  
14  
15  
16  
17 **53.** Li LM, Chen L, Deng GH *et al.* SLCO1B1\*15 haplotype is associated with rifampin-  
18 induced liver injury. *Mol Med Rep* 2012; **6**: 75-82.  
19  
20  
21  
22  
23  
24  
25  
26  
27  
28  
29  
30  
31  
32  
33  
34  
35  
36  
37  
38  
39  
40  
41  
42  
43  
44  
45  
46  
47  
48  
49  
50  
51  
52  
53  
54  
55  
56  
57  
58  
59  
60

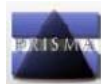

# PRISMA 2009 Checklist

1  
2  
3  
4  
5  
6  
7  
8  
9  
10  
11  
12  
13  
14  
15  
16  
17  
18  
19  
20  
21  
22  
23  
24  
25  
26  
27  
28  
29  
30  
31  
32  
33  
34  
35  
36  
37  
38  
39  
40  
41  
42  
43  
44  
45  
46  
47

| Section/topic                      | #  | Checklist item                                                                                                                                                                                                                                                                                              | Reported on page # |
|------------------------------------|----|-------------------------------------------------------------------------------------------------------------------------------------------------------------------------------------------------------------------------------------------------------------------------------------------------------------|--------------------|
| <b>TITLE</b>                       |    |                                                                                                                                                                                                                                                                                                             |                    |
| Title                              | 1  | Identify the report as a systematic review, meta-analysis, or both.                                                                                                                                                                                                                                         | Page 1             |
| <b>ABSTRACT</b>                    |    |                                                                                                                                                                                                                                                                                                             |                    |
| Structured summary                 | 2  | Provide a structured summary including, as applicable: background; objectives; data sources; study eligibility criteria, participants, and interventions; study appraisal and synthesis methods; results; limitations; conclusions and implications of key findings; systematic review registration number. | Page 3             |
| <b>INTRODUCTION</b>                |    |                                                                                                                                                                                                                                                                                                             |                    |
| Rationale                          | 3  | Describe the rationale for the review in the context of what is already known.                                                                                                                                                                                                                              | Page 5-6           |
| Objectives                         | 4  | Provide an explicit statement of questions being addressed with reference to participants, interventions, comparisons, outcomes, and study design (PICOS).                                                                                                                                                  | Page 5-6           |
| <b>METHODS</b>                     |    |                                                                                                                                                                                                                                                                                                             |                    |
| Protocol and registration          | 5  | Indicate if a review protocol exists, if and where it can be accessed (e.g., Web address), and, if available, provide registration information including registration number.                                                                                                                               | not applicable     |
| Eligibility criteria               | 6  | Specify study characteristics (e.g., PICOS, length of follow-up) and report characteristics (e.g., years considered, language, publication status) used as criteria for eligibility, giving rationale.                                                                                                      | Page 7-8           |
| Information sources                | 7  | Describe all information sources (e.g., databases with dates of coverage, contact with study authors to identify additional studies) in the search and date last searched.                                                                                                                                  | Page 7             |
| Search                             | 8  | Present full electronic search strategy for at least one database, including any limits used, such that it could be repeated.                                                                                                                                                                               | Page 7             |
| Study selection                    | 9  | State the process for selecting studies (i.e., screening, eligibility, included in systematic review, and, if applicable, included in the meta-analysis).                                                                                                                                                   | Page 7-8           |
| Data collection process            | 10 | Describe method of data extraction from reports (e.g., piloted forms, independently, in duplicate) and any processes for obtaining and confirming data from investigators.                                                                                                                                  | Page 8             |
| Data items                         | 11 | List and define all variables for which data were sought (e.g., PICOS, funding sources) and any assumptions and simplifications made.                                                                                                                                                                       | Page 8             |
| Risk of bias in individual studies | 12 | Describe methods used for assessing risk of bias of individual studies (including specification of whether this was done at the study or outcome level), and how this information is to be used in any data synthesis.                                                                                      | Page 8             |
| Summary measures                   | 13 | State the principal summary measures (e.g., risk ratio, difference in means).                                                                                                                                                                                                                               | Page 8-9           |
| Synthesis of results               | 14 | Describe the methods of handling data and combining results of studies, if done, including measures of consistency (e.g., $I^2$ ) for each meta-analysis.                                                                                                                                                   | Page 8-9           |

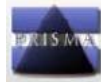

# PRISMA 2009 Checklist

Page 1 of 2

| Section/topic                 | #  | Checklist item                                                                                                                                                                                           | Reported on page #        |
|-------------------------------|----|----------------------------------------------------------------------------------------------------------------------------------------------------------------------------------------------------------|---------------------------|
| Risk of bias across studies   | 15 | Specify any assessment of risk of bias that may affect the cumulative evidence (e.g., publication bias, selective reporting within studies).                                                             | Page 8                    |
| Additional analyses           | 16 | Describe methods of additional analyses (e.g., sensitivity or subgroup analyses, meta-regression), if done, indicating which were pre-specified.                                                         | Page 8-9                  |
| <b>RESULTS</b>                |    |                                                                                                                                                                                                          |                           |
| Study selection               | 17 | Give numbers of studies screened, assessed for eligibility, and included in the review, with reasons for exclusions at each stage, ideally with a flow diagram.                                          | Figure 1                  |
| Study characteristics         | 18 | For each study, present characteristics for which data were extracted (e.g., study size, PICOS, follow-up period) and provide the citations.                                                             | Page 8                    |
| Risk of bias within studies   | 19 | Present data on risk of bias of each study and, if available, any outcome level assessment (see item 12).                                                                                                | Table 1                   |
| Results of individual studies | 20 | For all outcomes considered (benefits or harms), present, for each study: (a) simple summary data for each intervention group (b) effect estimates and confidence intervals, ideally with a forest plot. | Page 8-13                 |
| Synthesis of results          | 21 | Present results of each meta-analysis done, including confidence intervals and measures of consistency.                                                                                                  | Page 8-13                 |
| Risk of bias across studies   | 22 | Present results of any assessment of risk of bias across studies (see Item 15).                                                                                                                          | Supplementary Figure S5   |
| Additional analysis           | 23 | Give results of additional analyses, if done (e.g., sensitivity or subgroup analyses, meta-regression [see Item 16]).                                                                                    | Supplementary Table S6-S9 |
| <b>DISCUSSION</b>             |    |                                                                                                                                                                                                          |                           |
| Summary of evidence           | 24 | Summarize the main findings including the strength of evidence for each main outcome; consider their relevance to key groups (e.g., healthcare providers, users, and policy makers).                     | Page 13-14                |
| Limitations                   | 25 | Discuss limitations at study and outcome level (e.g., risk of bias), and at review-level (e.g., incomplete retrieval of identified research, reporting bias).                                            | Page 18                   |
| Conclusions                   | 26 | Provide a general interpretation of the results in the context of other evidence, and implications for future research.                                                                                  | Page 18-19                |
| <b>FUNDING</b>                |    |                                                                                                                                                                                                          |                           |
| Funding                       | 27 | Describe sources of funding for the systematic review and other support (e.g., supply of data); role of funders for the systematic review.                                                               | Page 19                   |

From: Moher D, Liberati A, Tetzlaff J, Altman DG, The PRISMA Group (2009). Preferred Reporting Items for Systematic Reviews and Meta-Analyses: The PRISMA Statement. PLoS Med 6(7): e1000097. doi:10.1371/journal.pmed1000097

For more information, visit: [www.prisma-statement.org](http://www.prisma-statement.org).

For peer review only - <http://bmjopen.bmj.com/site/about/guidelines.xhtml>

# BMJ Open

## Association of genetic polymorphisms of CYP2E1, NAT2, GST, and SLCO1B1 with the risk of anti-tuberculosis drug-induced liver injury: a systematic review and meta-analysis

|                                 |                                                                                                                                                                                                                                                                                                                                                                                                                                                                                                                                                                                   |
|---------------------------------|-----------------------------------------------------------------------------------------------------------------------------------------------------------------------------------------------------------------------------------------------------------------------------------------------------------------------------------------------------------------------------------------------------------------------------------------------------------------------------------------------------------------------------------------------------------------------------------|
| Journal:                        | <i>BMJ Open</i>                                                                                                                                                                                                                                                                                                                                                                                                                                                                                                                                                                   |
| Manuscript ID                   | bmjopen-2018-027940.R1                                                                                                                                                                                                                                                                                                                                                                                                                                                                                                                                                            |
| Article Type:                   | Research                                                                                                                                                                                                                                                                                                                                                                                                                                                                                                                                                                          |
| Date Submitted by the Author:   | 16-Apr-2019                                                                                                                                                                                                                                                                                                                                                                                                                                                                                                                                                                       |
| Complete List of Authors:       | Yang , Seungwon ; Yonsei University, Department of Pharmacy and Yonsei Institute of Pharmaceutical Science<br>Hwang, Se Jung ; Kyung Hee University, Department of Pharmacy<br>Park, Jung Yun ; Seoul National University, Department of Pharmacy<br>Chung, Eun Kyoung; Kyung Hee University, College of Pharmacy, Department of Pharmacy; Kyung Hee University Hospital at Gangdong, Department of Pharmacy<br>Lee , Jangik I.; Seoul National University, College of Pharmacy; Seoul National University, College of Pharmacy and Research Institute of Pharmaceutical Sciences |
| <b>Primary Subject Heading</b>: | Respiratory medicine                                                                                                                                                                                                                                                                                                                                                                                                                                                                                                                                                              |
| Secondary Subject Heading:      | Genetics and genomics, Infectious diseases, Evidence based practice                                                                                                                                                                                                                                                                                                                                                                                                                                                                                                               |
| Keywords:                       | Anti-tuberculosis drug-induced liver injury, genetic polymorphisms, meta-analysis, drug-metabolizing enzyme, drug transporter, Tuberculosis < INFECTIOUS DISEASES                                                                                                                                                                                                                                                                                                                                                                                                                 |
|                                 |                                                                                                                                                                                                                                                                                                                                                                                                                                                                                                                                                                                   |

SCHOLARONE™  
Manuscripts

1  
2  
3  
4  
5 1 Original article  
6  
7

8 2 **Association of genetic polymorphisms of *CYP2E1*, *NAT2*, *GST*, and**  
9  
10  
11 3 ***SLCO1B1* with the risk of anti-tuberculosis drug-induced liver**  
12  
13  
14 4 **injury: a systematic review and meta-analysis**  
15

16  
17  
18 5 Seungwon Yang<sup>1</sup>, Se Jung Hwang<sup>2</sup>, Jung Yun Park<sup>3</sup>, Eun Kyoung Chung<sup>2,4\*</sup>, Jangik Ike Lee<sup>3,5\*</sup>  
19

20 6 <sup>1</sup> Department of Pharmacy and Yonsei Institute of Pharmaceutical Science, College of Pharmacy,  
21  
22 Yonsei University, Incheon 21983, Republic of Korea  
23

24 8 <sup>2</sup> Department of Pharmacy, College of Pharmacy, Kyung Hee University, Seoul 02447, Republic  
25  
26 of Korea  
27  
28

29 10 <sup>3</sup> College of Pharmacy, Seoul National University, Seoul 08826, Republic of Korea  
30

31 11 <sup>4</sup> Department of Pharmacy, Kyung Hee University Hospital at Gangdong, Seoul, 05278,  
32  
33 Republic of Korea  
34  
35

36 13 <sup>5</sup> College of Pharmacy and Research Institute of Pharmaceutical Sciences, Seoul National  
37  
38 University, Seoul 08826, Republic of Korea  
39  
40

41  
42 15  
43  
44  
45 16 **Word counts: 4453 words**  
46  
47

48  
49 17  
50  
51 18 **\*Corresponding authors**  
52  
53

54 19 Prof., Eun Kyoung Chung, PharmD, Ph.D.  
55  
56

1  
2  
3  
4 20 Department of Pharmacy, College of Pharmacy, Kyung Hee University

5  
6  
7 21 26 Kyungheedaero, Dongdaemun-gu, Seoul 02447

8  
9 22 South Korea

10  
11 23 Tel: +82-2-962-2122

12  
13 24 Fax: +82-2-961-9580

14  
15 25 E-mail: cekchung@khu.ac.kr

16  
17  
18 26

19  
20 27 Prof. Jangik I. Lee, PharmD, Ph.D.

21  
22 28 Department of Pharmacy, College of Pharmacy, Seoul National University

23  
24 29 103 Daehak-Ro, Jongno-Gu, Seoul 03080

25  
26  
27 30 South Korea

28  
29 31 Tel: +82-2-3668-7474

30  
31 32 Fax: +82-2-3668-7475

32  
33 33 E-mail: jangik.lee@snu.ac.kr

34  
35 34 \*Jangik I. Lee and Eun Kyung Chung have equally contributed to this study.

36  
37  
38 35

39  
40  
41 36 **Running head**

42  
43  
44 37 Genetics of anti-tuberculosis liver injury

45  
46  
47  
48 38  
49  
50  
51  
52  
53  
54  
55  
56  
57  
58  
59  
60



## ABSTRACT

**Objectives** The objective of this study was to investigate the association between genetic polymorphisms of *NAT2*, *CYP2E1*, *GST*, and *SLCO1B1* and the risk of anti-tuberculosis drug-induced liver injury (ATDILI).

**Design** Systematic review and meta-analysis

**Data Sources** PubMed, EMBASE, Web of Science, and Cochrane Reviews databases were searched through February 2018.

**Eligibility Criteria** We included case-control or cohort studies investigating an association between *NAT2*, *CYP2E1*, *GST*, or *SLCO1B1* polymorphisms and the ATDILI risk in tuberculosis patients.

**Data extraction and synthesis** Three authors screened articles, extracted data, and assessed study quality. The strength of association was evaluated for each gene using the pooled odds ratio (OR) with a 95% confidence interval (CI) based on the fixed- or random-effects model. Sensitivity analysis was performed to confirm the reliability and robustness of the results.

**Results** Fifty-four studies were included in this analysis (n = 26 for *CYP2E1*, n = 35 for *NAT2*, n = 19 for *GST*, n = 4 for *SLCO1B1*). The risk of ATDILI was significantly increased with the following genotypes: *CYP2E1* *RsaI/PstI* c1/c1 (OR = 1.39; 95% CI 1.06–1.83), *NAT2* slow acetylator (OR = 3.30, 95% CI 2.65–4.11), and *GSTM1* null (OR = 1.30, 95% CI 1.12–1.52). No significant association with ATDILI was found for the genetic polymorphisms of *CYP2E1* *DraI*, *GSTT1*, *GSTM1/GSTT1*, *SLCO1B1* 388A>G, and *SLCO1B1* 521T>C (P > 0.05).

### Conclusions

ATDILI is more likely to occur in tuberculosis patients with *NAT2* slow acetylator genotype,

1  
2  
3  
4 61 *CYP2E1* *RsaI/PstI* c1/c1 genotype, and *GSTM1* null genotype. Close monitoring may be  
5  
6  
7 62 warranted for patients with these genotypes.  
8  
9 63

## 11 64 **Strengths and limitations of this study**

- 14 65 ● This is the first meta-analysis to evaluate the association between the risk of ATDILI  
15  
16 and *SLCO1B1* in TB patients.
- 17 66
- 18  
19 67 ● We included most updated studies with the large sample sizes to better clarify the  
20  
21 association of genetic polymorphisms with the risk of ATDILI.  
22 68
- 23  
24 69 ● The effect of anti-tuberculosis drug dosages on the risk of ATDILI could not be  
25  
26 accounted for in this study due to the lack of drug dosing information in the majority of  
27 70  
28 the included studies.  
29 71  
30  
31 72  
32  
33  
34 73

## 74 Introduction

75 Tuberculosis (TB) is a rampant infectious disease caused by *Mycobacterium tuberculosis*. It  
76 poses a major public health threat globally with approximately 1.3 million deaths and 10 million  
77 new cases in 2017 <sup>1</sup>. The mainstay of first-line TB treatment is a 4-drug combination regimen of  
78 isoniazid (INH), rifampicin (RIF), pyrazinamide (PZA), and ethambutol (EMB) during the first 2  
79 months, followed by INH and RIF for additional 4 months <sup>2,3</sup>. The currently recommended  
80 therapy for TB is highly effective, resulting in high cure rates if patients are adherent to therapy  
81 <sup>4</sup>. However, treatment adherence is often suboptimal in patients receiving the combination anti-  
82 TB therapy due to many adverse drug reactions, some of which are considered detrimental <sup>5</sup>. One  
83 of the common adverse drug reactions associated with anti-TB medications is anti-TB drug-  
84 induced liver injury (ATDILI) affecting 2–28% of tuberculosis patients<sup>6</sup>. ATDILI could be  
85 potentially serious and fatal, resulting in the treatment interruption and ultimately, treatment  
86 failure <sup>7,8</sup>.

87 Recently, increasing evidence suggests an association between the risk of ATDILI and genetic  
88 polymorphisms of drug-metabolizing enzymes (DMEs) and drug transporters <sup>9,10</sup>. Altered  
89 enzyme activity due to polymorphic genotypes of various DMEs including cytochrome P450  
90 2E1 (CYP2E1), N-acetyltransferase 2 (NAT2), and glutathione S-transferase (GST) can result in  
91 the accumulation of toxic substances in the liver, leading to the development of ATDILI <sup>11</sup>.  
92 However, conflicting results have been reported regarding the association between the risk of  
93 ATDILI and genetic polymorphisms of various DMEs in tuberculosis patients <sup>9,12,13</sup>. In addition  
94 to DMEs, drug transporters have been emerging as a key determinant of the pharmacokinetics  
95 and pharmacodynamics of a drug <sup>14</sup>. Among various drug transporters, organic anion

1  
2  
3  
4 96 transporting polypeptide 1B1 (OATP1B1), encoded by *SLCO1B1*, is the major influx transporter  
5  
6 97 responsible for hepatic uptake of RIF<sup>15</sup>. Although several studies have previously examined the  
7  
8 98 association between *SLCO1B1* polymorphisms and the risk of ATDILI, conflicting results have  
9  
10 99 been reported regarding the effect of *SLCO1B1* polymorphisms on ATDILI risk. Therefore, an  
11  
12 100 updated meta-analysis has been warranted to confirm the association between the ATDILI risk  
13  
14 101 and genetic polymorphisms of DMEs. In our preliminary literature search, several polymorphic  
15  
16 102 genes, including many DMEs, transporters, and other genes such as those involved in the  
17  
18 103 immune system, were identified to have an association with the risk of ATDILI. Among these,  
19  
20 104 sufficient, published information was available to confirm the effect of *CYP2E1*, *NAT2*, *GST*,  
21  
22 105 and *SLCO1B1* genetic polymorphisms on the ATDILI risk through meta-analysis.  
23  
24  
25  
26  
27

## 106 **Objectives**

31 107 The objective of this meta-analysis was to evaluate the association between the risk of ATDILI  
32  
33 108 and genetic polymorphisms of *CYP2E1*, *NAT2*, *GST*, and *SLCO1B1* in tuberculosis patients.  
34  
35  
36 109

## 110 **Methods**

41 111 This study was in compliance with the Meta-analysis Of Observational Studies in Epidemiology  
42  
43 112 (MOOSE) checklist for reporting the study design, search strategy, methods, results, and  
44  
45 113 conclusions (S1 Table). Three authors (SY, JP, and SH) independently conducted a literature  
46  
47 114 search, study selection, quality assessment, and data extraction. Any discrepancies were  
48  
49 115 adjudicated by corresponding authors (JIL and EKC).  
50  
51  
52

## 116 **Search strategy**

1  
2  
3  
4 117 Electronic databases of PubMed, EMBASE, Web of Science, and Cochrane Reviews were  
5  
6 118 systematically searched from their inception to February 2018 to identify relevant studies  
7  
8 119 evaluating the association of *NAT2*, *CYP2E1*, *GST*, and *SLCO1B1* polymorphisms with ATDILI  
9  
10  
11 120 risk. A comprehensive literature search was conducted using a combination of the following  
12  
13 121 keywords and Medical Subject Heading (MeSH) terms: (“genetic polymorphism” or “*NAT2*” or  
14  
15 122 “*CYP2E1*” or “*GST*” or “*SLCO1B1*” or “drug-metabolizing enzymes” or “drug transporter”)  
16  
17  
18 123 AND (“anti-tuberculosis agents drug-induced liver injuries” or “hepatotoxicity”). The detailed  
19  
20 124 search strategies for each electronic database used in this analysis are presented in S2 Table. The  
21  
22 125 reference lists in the selected reviews and meta-analyses were reviewed to ensure the inclusion of  
23  
24  
25 126 all relevant evidence in this analysis.

## 127 **Study selection**

31 128 Studies were considered eligible if they met all of the following inclusion criteria: (1) studies  
32  
33 129 with TB patients receiving anti-TB drug regimen; (2) studies with the control group of TB  
34  
35 130 patients tolerant of anti-TB medications; (3) studies evaluating the association between the  
36  
37 131 occurrence of ATDILI and genetic polymorphisms of *CYP2E1*, *NAT2*, *GST*, and *SLCO1B1*  
38  
39 132 388A>G and 521T>C; and (4) case-control or cohort observational studies. Excluded studies  
40  
41 133 were as follows: (1) studies available only in the form of abstracts or meeting posters; (2) review  
42  
43 134 or meta-analysis articles; (3) studies providing insufficient data necessary for the statistical data  
44  
45 135 analysis; (4) studies in non-English language; (5) non-human studies including animal and *in*  
46  
47 136 *vitro* studies; (6) studies with unpublished data; (7) studies providing insufficient information on  
48  
49  
50 137 genotyping methods; and (8) healthy controls.

## 138 **Quality assessment and data extraction**

139 The quality of included studies was assessed using the revised Little's recommendation based on  
140 the following criteria<sup>16 17</sup>: (1) scientific design; (2) definite inclusion of study population; (3)  
141 explicit information on study population; (4) explicit diagnostic criteria of ATDILI; (5) genetic  
142 detection method; (6) appropriate statistical analysis; and (7) logical discussion of study bias.

143 Studies with an overall score of  $\geq 4$  (range 0 to 7) were considered high quality and retained in  
144 the analysis.

145 The following data were extracted from each study using a standardized extraction form:

146 (1) name of the first author; (2) year of publication; (3) the polymorphic gene(s) and genotype(s)  
147 under investigation; (4) ethnicity; (5) sample size; (6) mean or median age; (7) sex distribution;  
148 (8) anti-TB drug regimens; (9) diagnostic criteria of ATDILI; (10) genotyping methods; and (11)  
149 the number of cases and controls for each polymorphic genotype.

## 150 **Statistical analysis**

151 The genotypes were analyzed based on the following proposed genetic risk model: (1) *NAT2*  
152 (slow acetylator vs. intermediate and fast acetylator); (2) *CYP2E1* (c1/c1 vs. c1/c2 and c2/c2 for  
153 the *RsaI/PstI* polymorphism, D/D vs. D/C and C/C for the *DraI* polymorphism); (3) *GSTM1* (null  
154 vs. non-null); (4) *GSTT1* (null vs. non-null); (5) *GSTM1/GSTT1* (dual-null vs. one- or non-null);  
155 and (6) *SLCO1B1* 388A>G and 521T>C polymorphisms. The genetic risk models for *NAT2*,  
156 *CYP2E1*, *GSTM1*, *GSTT1*, and *GSTM1/GSTT1* have been studied in previous studies<sup>9 18 19</sup>. Based  
157 on these previous studies, the most clinically significant and plausible model for each  
158 polymorphic gene was selected. Due to the relative paucity of data suggesting the most clinically  
159 relevant genetic model for *SLCO1B1* 388A>G and 521T>C polymorphisms, all three genomic

1  
2  
3  
4 160 models including dominant, recessive, and additive models were evaluated. The Mantel-  
5  
6 161 Haenszel or DerSimonian-Laird method based on fixed- or random-effects models, respectively,  
7  
8 162 were used depending on the presence of heterogeneity<sup>20 21</sup>. The random-effects model was used  
9  
10  
11 163 in the presence of significant heterogeneity; otherwise, the fixed-effects model was used to  
12  
13 164 estimate the total effect of a polymorphic gene genotype on the risk of ATDILI. Heterogeneity of  
14  
15 165 study outcomes among included studies was evaluated using Cochran's Q test (*Q*) and quantified  
16  
17 166 using Higgin's *I*<sup>2</sup> test. Significant heterogeneity was defined as the *I*<sup>2</sup> score of > 40%  
18  
19  
20 167 accompanied by  $P < 0.10$  from the Cochran's Q test<sup>22</sup>. The strength of the association between  
21  
22 168 the genetic polymorphisms and the risk of ATDILI was estimated using pooled odds ratios (ORs)  
23  
24 169 with the corresponding 95% confidence intervals (CIs). The statistical significance of an OR was  
25  
26 170 defined as  $P < 0.05$  from the Z test.

27  
28  
29 171 Subgroup analysis was performed based on ethnicity, anti-TB drug regimen used, and the type of  
30  
31 172 study design. Sensitivity analysis was conducted to assess the robustness of the results and to  
32  
33 173 identify the source of heterogeneity using the leave-one-out method. In each analysis, one study  
34  
35 174 was deleted, and with the one study left out, the meta-analysis was performed; this process was  
36  
37 175 repeated until every study had been deleted from our included study pool for each tested  
38  
39 176 polymorphic gene. Publication bias was evaluated with a symmetrical funnel plot. Statistical  
40  
41 177 analyses were performed using Review Manager Software version 5.3 (Cochrane Collaboration,  
42  
43 178 London, UK).

44  
45  
46  
47  
48 179

## 51 180 **Patient and public involvement**

52  
53  
54 181 Patients and public were not involved in the design of this study.  
55  
56

182

## 183 Results

### 184 Study selection and characteristics

185 Overall, 388 articles were identified through electronic database search and 3 articles through  
186 manual search by reviewing the reference lists of retrieved articles. After removing 99  
187 duplicates, 289 articles were screened for relevance based on the title and abstract. Among them,  
188 72 relevant articles were assessed for eligibility through full-text evaluations. Finally, a total of  
189 54 articles which met the inclusion criteria were included in our analysis (Figure 1). Among the  
190 54 studies, 26 studies were included for *CYP2E1*, 35 studies for *NAT2*, 19 studies for *GST* (19  
191 for *GSTMI*, 17 for *GSTTI*, and 11 for *GSTMI/GSTTI*), and 4 studies for *SLCO1B1* 388A>G and  
192 521T>C.

193 Table 1 summarizes the characteristics of the included studies. Across the included  
194 studies, large variability in study population was observed in terms of ethnicity (Chinese,  
195 Japanese, Korean, Indian, Taiwanese, Brazilian, Caucasian, Iranian, Tunisian, and Turkish), age  
196 (mean or median age ranging from 27 to 70 years), and sex (the proportion of males ranging  
197 from 13% to 90%). Patients in our included studies received either monotherapy with INH or  
198 RIF or a combination therapy including a 4-drug regimen of INH, RIF, PZA, and EMB for the  
199 treatment of TB. ATDILI was defined as an elevated serum alanine aminotransferase (ALT)  
200 concentration by 1.5- to 5-fold or greater above the upper limit of normal (ULN) depending on  
201 the study. The quality score of the included studies was 6 or greater based on the revised Little's  
202 recommendation (Table 1, S3 Table)<sup>16 17</sup>. Genotype distribution and genotyping method used in  
203 the included studies are summarized for each polymorphic gene in S4 to S7 Tables. Funnel plots



for *CYP2E1*, *NAT2*, *GST*, and *SLCO1B1* are provided in S8 Figure. None of the funnel plots showed an asymmetric inverted funnel shape, indicating the absence of potential publication bias.

## ***CYP2E1***

For the *CYP2E1* *RsaI/PstI* polymorphism, 24 studies with 1293 cases and 5450 controls were included in our primary analysis. Using the random-effects model, the pooled estimates of all included studies (n = 24) showed a significant association between the risk of ATDILI and the *CYP2E1* *RsaI/PstI* polymorphism (OR for the c1/c1 genotype = 1.39, 95% CI 1.06–1.83, P = 0.02;  $I^2 = 60\%$ ,  $P_{heterogeneity} < 0.0001$ ) (Figure 2A). In the subgroup analysis based on ethnicity, and anti-TB drug regimens, the risk of ATDILI was significantly increased for the *CYP2E1* *RsaI/PstI* c1/c1 genotype in East Asian patients (OR = 1.62, 95% CI 1.26–2.36, P = 0.01;  $I^2 = 69\%$ ,  $P_{heterogeneity} = 0.0006$ ) and in patients receiving a combination of anti-TB medications (OR = 1.35, 95% CI 1.01–1.79, P < 0.00001;  $I^2 = 61\%$ ,  $P_{heterogeneity} = 0.0002$ ) (S9 Table). No significant association was observed between the risk of ATDILI and the *CYP2E1* *RsaI/PstI* c1/c1 genotype when evaluating studies with the same study design only (i.e., either case-control studies or cohort studies) (S9 Table).

In our primary analysis for the *CYP2E1* *DraI* polymorphism with six studies including 233 cases and 1272 controls, no significant association was observed using the fixed-effects model between the risk of ATDILI and the *DraI* polymorphism (OR for the D/D genotype = 0.93, 95% CI 0.68–1.27, P = 0.64;  $I^2 = 0\%$ ,  $P_{heterogeneity} = 0.51$ ) (Figure 2B).

## ***NAT2***

Overall, 35 studies with 1323 cases and 7319 controls were included in our primary analysis for

1  
2  
3  
4 226 the *NAT2* polymorphism. Using the random-effects model, the pooled estimates of all included  
5  
6 227 studies (n = 35) showed a significant association between the risk of ATDILI and the *NAT2*  
7  
8 228 polymorphism (OR for the slow acetylator genotype = 3.30, 95% CI 2.65–4.11, P < 0.00001;  $I^2 =$   
9  
10 229 54%,  $P_{heterogeneity} < 0.0001$ ) (Figure 3). In the subgroup analysis based on ethnicity, anti-TB drug  
11  
12 230 regimens used, and study design, the risk of ATDILI was significantly increased in slow  
13  
14 231 acetylators compared to fast or intermediate acetylators in all subgroups (S10 Table).

## 18 232 ***GST***

20  
21 233 For the *GSTM1* polymorphism, a total of 19 studies with 977 cases and 5119 controls were  
22  
23 234 included in our primary analysis. Using the fixed-effects model, the pooled estimates of all  
24  
25 235 included studies (n = 19) showed a significant association between the risk of ATDILI and the  
26  
27 236 *GSTM1* polymorphism (OR for the *GSTM1* null genotype = 1.30, 95% CI 1.12–1.52, P = 0.0007;  
28  
29 237  $I^2 = 33%$ ,  $P_{heterogeneity} = 0.08$ ) (Figure 4A). When studies were stratified for ethnicity, the risk of  
30  
31 238 ATDILI was significantly increased for the *GSTM1* null genotype in Indians (OR = 1.68, 95% CI  
32  
33 239 1.30–2.19, P < 0.0001;  $I^2 = 36%$ ,  $P_{heterogeneity} = 0.15$ ) (S11 Table). In the subgroup analyses by  
34  
35 240 study design, the estimated OR (95% CI, P-value;  $I^2$ ,  $P_{heterogeneity}$ ) for the *GSTM1* null genotype  
36  
37 241 relative to the non-null genotype was 1.41 (1.04-1.93, P = 0.03;  $I^2 = 44%$ ,  $P_{heterogeneity} = 0.08$ ) in  
38  
39 242 cohort studies and 1.25 (1.01-1.55, P = 0.20;  $I^2 = 29%$ ,  $P_{heterogeneity} = 0.17$ ) in case-control studies,  
40  
41 243 respectively (S11 Table).

42  
43  
44 244 For the *GSTT1* and *GSTM1/GSTT1* polymorphisms, 17 studies (768 cases, 4823 controls)  
45  
46 245 and 11 studies (547 cases, 4233 controls) were included in our primary analyses, respectively.  
47  
48 246 The risk of ATDILI was not significantly associated with the *GSTT1* polymorphism (OR for the  
49  
50 247 null genotype = 1.03, 95% CI 0.85–1.25, P = 0.76;  $I^2 = 16%$ ,  $P_{heterogeneity} = 0.26$ ) or the

248 *GSTM1/GSTT1* polymorphism (OR for the dual-null genotype = 1.05, 95% CI 0.67–1.62,  $P =$   
249 0.84;  $I^2 = 59%$ ,  $P_{heterogeneity} = 0.006$ ) (Figures 4B and 4C). When studies were stratified for  
250 ethnicity, anti-TB drug regimens used, and study design, no subgroups showed significant  
251 association between the risk of ATDILI and the *GSTT1* and the *GSTM1/GSTT1* polymorphisms  
252 (S11 Table).

### 253 ***SLCO1B1***

254 For the *SLCO1B1* 388A>G polymorphism, four studies with 302 cases and 913 controls were  
255 included in our primary analysis. Using the dominant, recessive, or additive genomic model, no  
256 significant association was observed between the risk of ATDILI and the *SLCO1B1* 388A>G  
257 polymorphism (Table 2). For the *SLCO1B1* 521T>C polymorphism, four studies with 314 cases  
258 and 912 controls were included in our primary analysis. No significant association was found  
259 between the ATDILI risk and the *SLCO1B1* 521T>C polymorphism under the dominant,  
260 recessive, or additive genetic model (Table 2). Due to the lack of significant association between  
261 the risk of ATDILI and the tested *SLCO1B1* genetic polymorphisms in our primary meta-  
262 analysis, subgroup analyses were not performed for these genetic polymorphisms.

### 263 **Sensitivity analysis**

264 Our primary analysis results showed significantly high heterogeneity between studies for  
265 *CYP2E1* *RsaI/PstI* ( $I^2 = 60%$ ,  $P < 0.0001$ ), *NAT2* ( $I^2 = 54%$ ,  $P < 0.0001$ ), *GSTM1/GSTT1* ( $I^2 =$   
266 59%,  $P = 0.006$ ), and *SLCO1B1* 521T>C (dominant genetic model:  $I^2 = 66%$ ,  $P = 0.03$ )  
267 polymorphisms. This high heterogeneity between studies may be due to substantial differences in  
268 ethnicity, anti-TB drug regimen, the genotyping method used, study design, and diagnostic  
269 criteria of ATDILI among the included studies (Table 1). Through the sensitivity analyses,

1  
2  
3  
4 270 outlier studies were identified as the major source of heterogeneity. After removing these outlier  
5  
6 271 studies, heterogeneity was substantially reduced ( $I^2 = 60\%$  to  $42\%$  for *CYP2E1* *RsaI/PstI* <sup>23</sup>,  $I^2 =$   
7  
8 272  $54\%$  to  $34\%$  for *NAT2* <sup>24 25</sup>,  $I^2 = 59\%$  to  $0\%$  for *GSTM1/GSTT1* <sup>26 27</sup>, and  $I^2 = 66\%$  to  $0\%$  for  
9  
10 273 *SLCO1B1* 521T>C dominant genetic model <sup>28</sup>). The overall results for the association between  
11  
12 274 the risk of ATDILI and these genetic polymorphisms after excluding the outlier studies stayed  
13  
14 275 the same as those from our primary analysis results.  
15  
16 276

## 21 277 Discussion

22  
23  
24 278 In this study, we conducted a large-scale meta-analysis evaluating the association between the  
25  
26 279 risk of ATDILI and genetic polymorphisms of *SLCO1B1* as well as various DMEs including  
27  
28 280 *CYP2E1*, *NAT2*, and *GST* to provide more updated, comprehensive, and compelling evidence.  
29  
30 281 Compared with previous meta-analyses, our present study included a larger number of studies,  
31  
32 282 which may sufficiently increase the statistical power compared to individual studies. However,  
33  
34 283 a limited number of studies for the *SLCO1B1* genetic polymorphisms were included ( $n = 4$ ).  
35  
36 284 Consistently with previous studies, our current study suggested a significantly increased risk of  
37  
38 285 ATDILI in patients with the *CYP2E1* *RsaI/PstI* c1/c1 genotype (OR = 1.39, 95% CI 1.06–1.83),  
39  
40 286 the *NAT2* slow acetylator genotype (OR = 3.30, 95% CI 2.65–4.11), and the *GSTM1* null  
41  
42 287 genotype (OR = 1.30, 95% CI 1.12–1.52) <sup>9 12 29</sup>. Among these genotypes, the largest increase in  
43  
44 288 the risk of ATDILI was shown in patients with the *NAT2* slow acetylator genotype. In contrast,  
45  
46 289 no significant association was observed between the risk of ATDILI and the genetic  
47  
48 290 polymorphisms of *CYP2E1* *DraI*, *GSTT1*, *GSTM1/GSTT1*, *SLCO1B1* 388A>G, and *SLCO1B1*  
49  
50 291 521T>C. Caution needs to be exercised when interpreting this study finding because the lack of  
51  
52  
53  
54  
55  
56  
57  
58  
59  
60

1  
2  
3  
4 292 significant association between these polymorphisms and the risk of ATDILI might be due to  
5  
6 293 small sample sizes and the low frequency of ATDILI reported in patients with these genetic  
7  
8  
9 294 polymorphisms.

10  
11 295 When evaluating the impact of the *CYP2E1 RsaI/PstI* and *DraI* genetic polymorphisms  
12  
13 296 on the risk of ATDILI in our study, patients with the *RsaI/PstI* c1/c1 genotype were 1.39-times  
14  
15 297 more likely to develop ATDILI. Similarly, in a previous meta-analysis by Deng and colleagues,  
16  
17 298 the risk of ATDILI was 1.4-times higher in patients with the *RsaI/PstI* c1/c1 genotype compared  
18  
19 299 to other genotypes<sup>30</sup>. In the liver, INH is metabolized by NAT2 to acetylisoniazid which is  
20  
21 300 consequently oxidized by CYP2E1 to reactive hepatotoxic intermediates<sup>31 32</sup>. The increased  
22  
23 301 inducibility or greater activity of CYP2E1 in patients with the *CYP2E1 RsaI/PstI* c1/c1 genotype  
24  
25 302 may result in the production of more intermediate hepatotoxins, ultimately leading to the  
26  
27 303 increased risk of ATDILI<sup>31 32</sup>. Our subgroup analysis showed a significantly increased risk of  
28  
29 304 ATDILI in the *CYP2E1 RsaI/PstI* c1/c1 genotype carriers of East Asian ethnicity (S9 Table),  
30  
31 305 suggesting a potential gene-ethnicity interaction<sup>33</sup>. A previous study identified age, female sex,  
32  
33 306 white race, non-Hispanic ethnicity, lower body mass index, elevated plasma aspartate  
34  
35 307 transaminase concentrations at baseline, and nine months of daily INH use as risk factors for  
36  
37 308 ATDILI<sup>34</sup>. Considering their race, ethnicity, and relatively lower body mass index compared to  
38  
39 309 other ethnicities, East Asians may be at an increased risk of ATDILI. As the *CYP2E1 RsaI/PstI*  
40  
41 310 c1 allele frequency is relatively low in this population (79.8% vs. 88.5% to 99.8% in other  
42  
43 311 ethnicities), the ethnicity itself might play an important role in developing hepatotoxicity through  
44  
45 312 gene-ethnicity interaction<sup>35</sup>. Furthermore, the relatively high frequency of c2 allele in this  
46  
47 313 population might serve as a good control to estimate the effect of c1 allele on the risk of  
48  
49 314 ATDILI; the rarity of this minor allele in other ethnicities could make it difficult to evaluate the

1  
2  
3  
4 315 association between the ATDILI risk and this genetic polymorphism<sup>35</sup>. In addition to ethnicity,  
5  
6 316 combination anti-TB therapy was shown to significantly increase the risk of ATDILI in patients  
7  
8  
9 317 with the *CYP2E1 RsaI/PstI* c1/c1 genotype (S9 Table). This is consistent with previous study  
10  
11 318 findings because hepatotoxicity commonly occurs with anti-TB drugs such as INH and RIF and  
12  
13 319 thus, use of more than one hepatotoxic anti-TB medication increases the risk of ATDILI<sup>7</sup>.

14  
15  
16 320         Similar to previous studies, our current study suggested a significantly increased risk of  
17  
18 321 ATDILI in patients with the *NAT2* slow acetylator genotype compared to those with  
19  
20 322 intermediate/fast acetylator genotypes<sup>9 29</sup>. The risk of ATDILI in slow acetylators remained  
21  
22 323 significantly increased in all tested subgroups regardless of ethnicity and the anti-TB drug  
23  
24 324 regimen used (S10 Table). The frequencies of *NAT2* slow acetylator alleles are highly variable  
25  
26  
27 325 between ethnic groups, ranging from 32% in Koreans to 76% in Caucasians<sup>36</sup>. Despite this large  
28  
29 326 inter-ethnic variability in the *NAT2* polymorphic allele frequency, the *NAT2* slow acetylator  
30  
31 327 genotype consistently and significantly increased the risk of ATDILI across all ethnicities,  
32  
33 328 suggesting the critical role of *NAT2* polymorphism in the development of ATDILI. In addition,  
34  
35  
36 329 the increased risk of ATDILI in slow acetylators receiving INH monotherapy or combination  
37  
38 330 therapy further highlights the importance of the *NAT2* polymorphism in the development of  
39  
40 331 INH-induced hepatotoxicity. The clearance of INH is slower in slow acetylators compared to  
41  
42 332 rapid or intermediate acetylators, resulting in the accumulation of INH in these patients<sup>37 38</sup>. This  
43  
44 333 high level of INH may increase the risk of ATDILI in tuberculosis patients with the *NAT2* slow  
45  
46 334 acetylator genotype due to immune-mediated liver injury through the binding of INH to liver  
47  
48 335 proteins<sup>39</sup>. Therefore, clinicians should closely monitor tuberculosis patients with the *NAT2* slow  
49  
50 336 acetylator genotype for hepatotoxicity when INH-based treatment is administered to these  
51  
52 337 patients.  
53  
54  
55  
56  
57  
58  
59  
60

1  
2  
3  
4 338 According to previous studies, GST enzymes, particularly those coded by *GSTM1* and  
5  
6 339 *GSTT1* loci, are associated with the risk of drug-induced hepatotoxicity<sup>9 40</sup>. Similar to previous  
7  
8  
9 340 studies, our current study demonstrated a significantly increased risk of ATDILI in individuals  
10  
11 341 with the *GSTM1* null genotype compared to those with the non-null genotype; however, the risk  
12  
13 342 of ATDILI was not affected by the *GSTT1* or *GSTM1/GSTT1* genetic polymorphisms. GSTs are  
14  
15 343 important enzymes to detoxify various xenobiotics and play an essential role in INH metabolism  
16  
17 344 by eliminating acetyldiazene ketene acetylonium ion, which is a possibly hepatotoxic free radical  
18  
19 345 metabolite of INH, from the body through *GSTM1*. This may account for the significant  
20  
21 346 association of the ATDILI risk with the *GSTM1* genotype, but not with the *GSTT1* or  
22  
23 347 *GSTM1/GSTT1* genotypes<sup>9 40</sup>. Our subgroup analysis showed a significantly increased risk of  
24  
25 348 ATDILI in the *GSTM1* null genotype carriers of Indian ethnicity; although not statistically  
26  
27 349 significant, the risk of ATDILI was relatively high in the East Asian population with the *GSTM1*  
28  
29 350 null genotype (S11 Table). Considering the substantial difference in the *GSTM1* null allele  
30  
31 351 frequency between Indians (29.6%) and East Asians (52.1%), a potential gene-ethnicity  
32  
33 352 interaction may exist based on their race, ethnicity, and body size as aforementioned<sup>34 41</sup>. Other  
34  
35 353 characteristics than the *GSTM1* polymorphism in these ethnicities may play a more important  
36  
37 354 role in the development of ATDILI. In addition, when studies were stratified by study design, the  
38  
39 355 risk of ATDILI was significantly increased in patients with the *GSTM1* null genotype for cohort  
40  
41 356 studies only, but not for case-control studies, probably due to a relatively larger sample size with  
42  
43 357 cohort studies compared to case-control studies.

44  
45 358 *SLCO1B1* encodes organic anion transporting polypeptide 1B1 (OATP1B1) which is a  
46  
47 359 major influx drug transporter responsible for the hepatic uptake of various endogenous and  
48  
49 360 exogenous substances including RIF<sup>42</sup>. Previous studies showed significantly altered systemic



1  
2  
3  
4 361 exposure of RIF in carriers of the *SLCO1B1* polymorphism<sup>43 44</sup>. To our knowledge, only four  
5  
6 362 studies have been conducted to examine the association between the ATDILI risk and the  
7  
8 363 *SLCO1B1* genetic polymorphisms<sup>10 28 42 45</sup>. Various single nucleotide polymorphisms (SNPs) of  
9  
10 364 *SLCO1B1* were evaluated in these studies; however, *SLCO1B1* 388A>G (rs2306283) and  
11  
12 365 521T>C (rs4149056) were the only polymorphisms assessed in common<sup>10 28 42 45</sup>. Therefore, to  
13  
14 366 maximize the sample size in our current meta-analysis, we examined the association between the  
15  
16 367 risk of ATDILI and the polymorphic genotypes of *SLCO1B1* 388A>G and 521T>C. Similar to  
17  
18 368 each of the included studies, we did not find significant difference in the risk of ATDILI among  
19  
20 369 patients with different *SLCO1B1* 388A>G and 521T>C genotypes.  
21  
22  
23  
24

25 370 There are limitations to this study. First, due to the lack of information regarding other  
26  
27 371 patient characteristics potentially associated with ATDILI, our estimated ORs were not adjusted  
28  
29 372 based on the potential risk factors such as age, anti-TB drug dosages, alcohol consumption,  
30  
31 373 cigarette smoking, and other lifestyle characteristics<sup>7 46</sup>. Second, our literature search limited to  
32  
33 374 the articles published in English may lead to language bias. Third, a specific causative agent of  
34  
35 375 ATDILI could not be identified in our analysis because most patients in our included studies  
36  
37 376 received a combination regimen of anti-TB drugs. Fourth, only the limited number of  
38  
39 377 polymorphic genotypes were assessed for the association with the risk of ATDILI, particularly  
40  
41 378 for *SLCO1B1*. In addition, only one genetic model was used for *CYP2E1*, *NAT2*, and *GST* when  
42  
43 379 evaluating the association between genetic polymorphisms of these genes and the risk of  
44  
45 380 ATDILI. Although we acknowledge dominant, recessive, and additive genomic models can be  
46  
47 381 used for two alleles, it could not be applied to our meta-analysis because we compared patients  
48  
49 382 with different genotype-based phenotype, i.e., slow acetylator vs. fast/intermediate acetylator and  
50  
51 383 null vs. non-null *GSTs*. Multiple allelic variants or allele subgroups may represent the same  
52  
53  
54  
55  
56  
57  
58  
59  
60



1  
2  
3  
4 384 phenotype (e.g., *NAT2*\*5B, \*6A, and \*7B all represent slow acetylator genotypes), and the  
5  
6 385 genetic model selection can be varied depending on the specific allelic variant<sup>47</sup>. Therefore, the  
7  
8 386 genetic models used in previous original and meta-analysis studies were adopted for these  
9  
10  
11 387 polymorphic genes in our current study<sup>9 18 19</sup>. Future studies are needed to comprehensively and  
12  
13 388 adequately address the relationship between the ATDILI risk and various genetic polymorphisms  
14  
15  
16 389 by using different genetic risk models and including more polymorphic genotypes.

17  
18 390 In conclusion, the risk of ATDILI during TB therapy was significantly increased in  
19  
20 391 tuberculosis patients carrying *NAT2* slow acetylator, *CYP2E1* *RsaI/PstI* c1/c1, or *GSTM1* null  
21  
22 392 genotypes. Screening for these genetic polymorphisms, particularly for the *NAT2* slow acetylator  
23  
24 393 genotype, may be of great clinical benefit to identify patients at high risk for ATDILI and  
25  
26  
27 394 minimize the risk of ATDILI. Future studies are pertinent to develop dose and/or treatment  
28  
29 395 adjustment strategies, to evaluate the feasibility and cost-effectiveness of the genetic screening  
30  
31 396 test, and to assess the effect of more genetic polymorphisms on the risk of ATDILI for optimal  
32  
33 397 prevention and management of ATDILI.

34  
35  
36  
37 398

## 39 40 41 399 **Acknowledgments**

42  
43  
44 400 This study was supported by Research Resettlement Fund for the new faculty of Seoul National  
45  
46 401 University.

47  
48  
49 402  
50  
51

## 52 403 **Contributors**

53  
54  
55 404 S.Y. devised and designed the study. S.Y., J.Y.P., and S.J.H. conducted the literature search,

1  
2  
3  
4 405 performed data extraction and analysis, and. interpreted the data. S.Y., E.K.C., and J.I.L.  
5  
6 406 prepared and reviewed the manuscript. All authors reviewed, amended and approved the  
7  
8  
9 407 submitted manuscript  
10  
11  
12 408

## 14 15 409 **Funding**

16  
17  
18 410 Research Resettlement Fund for the new faculty of Seoul National University provided funding  
19  
20 411 to Jangik I. Lee. The funder had no role in data collection, data analysis, translation, and drafting  
21  
22 412 of the manuscript  
23  
24  
25 413

## 26 27 414 **Competing interests**

28  
29  
30  
31 415 None declared  
32  
33  
34 416

## 35 36 417 **Patient consent**

37  
38  
39  
40 418 Not required  
41  
42 419

## 43 44 420 **Provenance and peer review**

45  
46  
47  
48 421 Not commissioned, externally peer reviewed  
49  
50 422

## 51 52 423 **Data sharing statement**

1  
2  
3  
4  
5  
6  
7  
8  
9  
10  
11  
12  
13  
14  
15  
16  
17  
18  
19  
20  
21  
22  
23  
24  
25  
26  
27  
28  
29  
30  
31  
32  
33  
34  
35  
36  
37  
38  
39  
40  
41  
42  
43  
44  
45  
46  
47  
48  
49  
50  
51  
52  
53  
54  
55  
56  
57  
58  
59  
60

424 No additional unpublished data are available

425

For peer review only

426 **References**

- 427 1. WHO. Global tuberculosis report Geneva, Switzerland: WHO, 2014.
- 428 2. WHO. Treatment of tuberculosis guidelines, 4th edition. Geneva, Switzerland: WHO, 2010.
- 429 3. Blumberg H, Burman W, Chaisson R, *et al.* American Thoracic Society/Centers for  
430 Disease Control and Prevention/Infectious Diseases Society of America: treatment of  
431 tuberculosis. *Am J Respir Crit Care Med* 2003;167:603.
- 432 4. Zumla A, Raviglione M, Hafner R, *et al.* Tuberculosis. *N Engl J Med* 2013;368:745-55.
- 433 5. Lange C, Abubakar I, Alffenaar J-WC, *et al.* Management of patients with multidrug-  
434 resistant/extensively drug-resistant tuberculosis in Europe: a TBNET consensus statement.  
435 *Eur Respir J* 2014;44:23-63.
- 436 6. Tostmann A, Boeree MJ, Aarnoutse RE, *et al.* Antituberculosis drug-induced  
437 hepatotoxicity: concise up-to-date review. *J Gastroenterol Hepatol* 2008;23:192-202.
- 438 7. Saukkonen JJ, Cohn DL, Jasmer RM, *et al.* An official ATS statement: hepatotoxicity of  
439 antituberculosis therapy. *Am J Respir Crit Care Med* 2006;174:935-52.
- 440 8. Yee D, Valiquette C, Pelletier M, *et al.* Incidence of serious side effects from first-line  
441 antituberculosis drugs among patients treated for active tuberculosis. *Am J Respir Crit Care*  
442 *Med* 2003;167:1472-7.
- 443 9. Cai Y, Yi J, Zhou C, *et al.* Pharmacogenetic Study of Drug-Metabolising Enzyme  
444 Polymorphisms on the Risk of Anti-Tuberculosis Drug-Induced Liver Injury: A Meta-  
445 Analysis. *PLoS ONE* 2012;7.
- 446 10. Kim SH, Kim SH, Lee JH, *et al.* Polymorphisms in drug transporter genes (ABCB1,  
447 SLCO1B1 and ABCC2) and hepatitis induced by antituberculosis drugs. *Tuberculosis*  
448 2012;92:100-4.
- 449 11. Roy PD, Majumder M, Roy B. Pharmacogenomics of anti-TB drugs-related hepatotoxicity.  
450 *Pharmacogenomics* 2008;9:311-21.
- 451 12. Sun F, Chen Y, Xiang Y, *et al.* Drug-metabolising enzyme polymorphisms and  
452 predisposition to anti-tuberculosis drug-induced liver injury: a meta-analysis. *Int J Tuberc*  
453 *Lung Dis* 2008;12:994-1002.
- 454 13. Chan SL, Chua APG, Aminkeng F, *et al.* Association and clinical utility of NAT2 in the  
455 prediction of isoniazid-induced liver injury in Singaporean patients. *PloS one*

- 1  
2  
3  
4 456 2017;12:e0186200.
- 5  
6 457 14. Kerb R. Implications of genetic polymorphisms in drug transporters for pharmacotherapy.  
7  
8 458 *Cancer Lett* 2006;234:4-33.
- 9  
10 459 15. Cui Y, Konig J, Leier I, *et al.* Hepatic uptake of bilirubin and its conjugates by the human  
11  
12 460 organic anion transporter SLC21A6. *J Biol Chem* 2001;276:9626-30.
- 13 461 16. Little J, Bradley L, Bray MS, *et al.* Reporting, appraising, and integrating data on genotype  
14  
15 462 prevalence and gene-disease associations. *American journal of epidemiology*  
16  
17 463 2002;156:300-10.
- 18 464 17. Tang N, Deng R, Wang Y, *et al.* GSTM1 and GSTT1 null polymorphisms and  
19  
20 465 susceptibility to anti-tuberculosis drug-induced liver injury: a meta-analysis. *Int J Tuberc*  
21  
22 466 *Lung Dis* 2013;17:17-25.
- 23 467 18. Wang F-J, Wang Y, Niu T, *et al.* Update meta-analysis of the CYP2E1 RsaI/PstI and DraI  
24  
25 468 polymorphisms and risk of antituberculosis drug-induced hepatotoxicity: evidence from 26  
26  
27 469 studies. *Journal of Clinical Pharmacy and Therapeutics* 2016;41:334-40.
- 28 470 19. Li C, Long J, Hu X, *et al.* GSTM1 and GSTT1 genetic polymorphisms and risk of anti-  
29  
30 471 tuberculosis drug-induced hepatotoxicity: an updated meta-analysis. *Eur J Clin Microbiol*  
31  
32 472 *Infect Dis* 2013;32:859-68.
- 33  
34 473 20. Mantel N, Haenszel W. Statistical aspects of the analysis of data from retrospective studies  
35  
36 474 of disease. *Journal of the national cancer institute* 1959;22:719-48.
- 37 475 21. DerSimonian R, Laird N. Meta-analysis in clinical trials. *Controlled clinical trials*  
38  
39 476 1986;7:177-88.
- 40  
41 477 22. Higgins JP, Thompson SG. Quantifying heterogeneity in a meta-analysis. *Statistics in*  
42  
43 478 *medicine* 2002;21:1539-58.
- 44 479 23. Feng FM, Guo M, Chen Y, *et al.* Genetic polymorphisms in metabolic enzymes and  
45  
46 480 susceptibility to anti-tuberculosis drug-induced hepatic injury. *Genetics and Molecular*  
47  
48 481 *Research* 2014;13:9463-71.
- 49 482 24. Lv X, Tang S, Xia Y, *et al.* NAT2 genetic polymorphisms and anti-tuberculosis drug-  
50  
51 483 induced hepatotoxicity in Chinese community population. *Ann Hepatol* 2012;11:700-7.
- 52  
53 484 25. Wattanapokayakit S, Mushiroda T, Yanai H, *et al.* NAT2 slow acetylator associated with  
54  
55 485 anti-tuberculosis drug-induced liver injury in Thai patients. *Int J Tuberc Lung Dis*

- 1  
2  
3  
4 486 2016;20:1364-9.
- 5  
6 487 26. Singla N, Gupta D, Birbian N, *et al.* Association of NAT2, GST and CYP2E1  
7  
8 488 polymorphisms and anti-tuberculosis drug-induced hepatotoxicity. *Tuberculosis*  
9  
10 489 2014;94:293-8.
- 11 490 27. Gupta VH, Amarapurkar DN, Singh M, *et al.* Association of N-acetyltransferase 2 and  
12  
13 491 cytochrome P450 2E1 gene polymorphisms with antituberculosis drug-induced  
14  
15 492 hepatotoxicity in Western India. *Journal of Gastroenterology and Hepatology*  
16  
17 493 2013;28:1368-74.
- 18 494 28. Li LM, Chen L, Deng GH, *et al.* SLCO1B1\*15 haplotype is associated with rifampin-  
19  
20 495 induced liver injury. *Mol Med Rep* 2012;6:75-82.
- 21 496 29. Wang PY, Xie SY, Hao Q, *et al.* NAT2 polymorphisms and susceptibility to anti-  
22  
23 497 tuberculosis drug-induced liver injury: a meta-analysis. *Int J Tuberc Lung Dis*  
24  
25 498 2012;16:589-95.
- 26 499 30. Deng R, Yang T, Wang Y, *et al.* CYP2E1 RsaI/PstI polymorphism and risk of anti-  
27  
28 500 tuberculosis drug-induced liver injury: a meta-analysis. *Int J Tuberc Lung Dis*  
29  
30 501 2012;16:1574-81.
- 31  
32 502 31. Mitchell JR, Zimmerman HJ, Ishak KG, *et al.* Isoniazid liver injury: clinical spectrum,  
33  
34 503 pathology, and probable pathogenesis. *Ann Intern Med* 1976;84:181-92.
- 35 504 32. Ryan D, Ramanathan L, Iida S, *et al.* Characterization of a major form of rat hepatic  
36  
37 505 microsomal cytochrome P-450 induced by isoniazid. *Journal of Biological Chemistry*  
38  
39 506 1985;260:6385-93.
- 40 507 33. Ortega VE, Meyers DA. Pharmacogenetics: implications of race and ethnicity on defining  
41  
42 508 genetic profiles for personalized medicine. *J Allergy Clin Immunol* 2014;133:16-26.
- 43  
44 509 34. Bliven-Sizemore EE, Sterling TR, Shang N, *et al.* Three months of weekly rifapentine plus  
45  
46 510 isoniazid is less hepatotoxic than nine months of daily isoniazid for LTBI. *Int J Tuberc*  
47  
48 511 *Lung Dis* 2015;19:1039-44, i-v.
- 49 512 35. Zhou Y, Ingelman-Sundberg M, Lauschke VM. Worldwide distribution of cytochrome  
50  
51 513 P450 alleles: a meta-analysis of population-scale sequencing projects. *Clinical*  
52  
53 514 *Pharmacology & Therapeutics* 2017;102:688-700.
- 54 515 36. Lin HJ, Han C-Y, Lin BK, *et al.* Ethnic distribution of slow acetylator mutations in the

- 1  
2  
3  
4 516 polymorphic N-acetyltransferase (NAT2) gene. *Pharmacogenetics* 1994;4:125-34.
- 5  
6 517 37. Seng KY, Hee KH, Soon GH, *et al.* Population Pharmacokinetic Analysis of Isoniazid,  
7  
8 518 Acetylisoniazid, and Isonicotinic Acid in Healthy Volunteers. *Antimicrobial Agents and*  
9  
10 519 *Chemotherapy* 2015;59:6791-9.
- 11 520 38. Wang P, Pradhan K, Zhong XB, *et al.* Isoniazid metabolism and hepatotoxicity. *Acta*  
12  
13 521 *Pharm Sin B* 2016;6:384-92.
- 14 522 39. Metushi IG, Nakagawa T, Uetrecht J. Direct oxidation and covalent binding of isoniazid  
15  
16 523 to rodent liver and human hepatic microsomes: humans are more like mice than rats. *Chem*  
17  
18 524 *Res Toxicol* 2012;25:2567-76.
- 19 525 40. Ramachandran G, Swaminathan S. Role of pharmacogenomics in the treatment of  
20  
21 526 tuberculosis: a review. *Pharmgenomics Pers Med* 2012;5:89-98.
- 22 527 41. Kasthurinaidu SP, Ramasamy T, Ayyavoo J, *et al.* GST M1-T1 null allele frequency  
23  
24 528 patterns in geographically assorted human populations: a phylogenetic approach. *PLoS*  
25  
26 529 *One* 2015;10:e0118660.
- 27 530 42. Chen R, Wang J, Tang S, *et al.* Association of polymorphisms in drug transporter genes  
28  
29 531 (SLCO1B1 and SLC10A1) and anti-tuberculosis drug-induced hepatotoxicity in a Chinese  
30  
31 532 cohort. *Tuberculosis* 2015;95:68-74.
- 32 533 43. Weiner M, Peloquin C, Burman W, *et al.* Effects of tuberculosis, race, and human gene  
33  
34 534 SLCO1B1 polymorphisms on rifampin concentrations. *Antimicrob Agents Chemother*  
35  
36 535 2010;54:4192-200.
- 37 536 44. Chigutsa E, Visser ME, Swart EC, *et al.* The SLCO1B1 rs4149032 polymorphism is highly  
38  
39 537 prevalent in South Africans and is associated with reduced rifampin concentrations: dosing  
40  
41 538 implications. *Antimicrob Agents Chemother* 2011;55:4122-7.
- 42 539 45. Yimer G, Ueda N, Habtewold A, *et al.* Pharmacogenetic & pharmacokinetic biomarker for  
43  
44 540 efavirenz based ARV and rifampicin based anti-TB drug induced liver injury in TB-HIV  
45  
46 541 infected patients. *PLoS One* 2011;6:e27810.
- 47 542 46. Chen R, Wang J, Zhang Y, *et al.* Key factors of susceptibility to anti-tuberculosis drug-  
48  
49 543 induced hepatotoxicity. *Arch Toxicol* 2015;89:883-97.
- 50 544 47. Khan S, Mandal RK, Elsbali AM, *et al.* Pharmacogenetic association between NAT2 gene  
51  
52 545 polymorphisms and isoniazid induced hepatotoxicity: trial sequence meta-analysis as

- 1  
2  
3  
4 546 evidence. *Bioscience reports* 2019;39:BSR20180845.
- 5  
6 547 48. Kim SH, Kim SH, Bahn JW, *et al.* Genetic polymorphisms of drug-metabolizing enzymes  
7  
8 548 and anti-TB drug-induced hepatitis. *Pharmacogenomics* 2009;10:1767-79.
- 9  
10 549 49. Singh M, Gupta VH, Amarpurkar DN, *et al.* Association of genetic variants with anti-  
11  
12 550 tuberculosis drug induced hepatotoxicity: A high resolution melting analysis. *Infection*  
13  
14 551 *Genetics and Evolution* 2014;23:42-8.
- 15 552 50. Tang S, Lv X, Zhang Y, *et al.* Cytochrome P450 2E1 Gene Polymorphisms/Haplotypes  
16  
17 553 and Anti-Tuberculosis Drug-Induced Hepatitis in a Chinese Cohort. *PLoS ONE*  
18  
19 554 2013;8:e57526.
- 20 555 51. Ben Mahmoud L, Ghazzi H, Kamoun A, *et al.* Polymorphism of the N-acetyltransferase 2  
21  
22 556 gene as a susceptibility risk factor for antituberculosis drug-induced hepatotoxicity in  
23  
24 557 Tunisian patients with tuberculosis. *Pathologie Biologie* 2012;60:324-30.
- 25 558 52. Bozok Cetintas V, Erer OF, Kosova B, *et al.* Determining the relation between N-  
26  
27 559 acetyltransferase-2 acetylator phenotype and antituberculosis drug induced hepatitis by  
28  
29 560 molecular biologic tests. *Tuberk Toraks* 2008;56:81-6.
- 30 561 53. Higuchi N, Tahara N, Yanagihara K, *et al.* NAT2 6A, a haplotype of the N-  
31  
32 562 acetyltransferase 2 gene, is an important biomarker for risk of anti-tuberculosis drug-  
33  
34 563 induced hepatotoxicity in Japanese patients with tuberculosis. *World J Gastroenterol*  
35  
36 564 2007;13:6003-8.
- 37 565 54. Ho HT, Wang TH, Hsiong CH, *et al.* The NAT2 tag SNP rs1495741 correlates with the  
38  
39 566 susceptibility of antituberculosis drug-induced hepatotoxicity. *Pharmacogenet Genomics*  
40  
41 567 2013;23:200-7.
- 42 568 55. Huang YS, Chern HD, Su WJ, *et al.* Polymorphism of the N-acetyltransferase 2 gene as a  
43  
44 569 susceptibility risk factor for antituberculosis drug-induced hepatitis. *Hepatology*  
45  
46 570 2002;35:883-9.
- 47 571 56. Khalili H, Fouladdel S, Sistanizad M, *et al.* Association of N-acetyltransferase-2 genotypes  
48  
49 572 and anti-tuberculosis induced liver injury: First case-controlled study from Iran. *Current*  
50  
51 573 *Drug Safety* 2011;6:17-22.
- 52  
53 574 57. Leiro-Fernandez V, Valverde D, Vazquez-Gallardo R, *et al.* N-acetyltransferase 2  
54  
55 575 polymorphisms and risk of anti-tuberculosis drug-induced hepatotoxicity in Caucasians.



- 1  
2  
3  
4 576 *International Journal of Tuberculosis and Lung Disease* 2011;15:1403-8.
- 5  
6 577 58. Ng CS, Hasnat A, Al Maruf A, *et al.* N-acetyltransferase 2 (NAT2) genotype as a risk  
7  
8 578 factor for development of drug-induced liver injury relating to antituberculosis drug  
9  
10 579 treatment in a mixed-ethnicity patient group. *European Journal of Clinical Pharmacology*  
11 580 2014;70:1079-86.
- 12  
13 581 59. Ohno M, Yamaguchi I, Yamamoto I, *et al.* Slow N-acetyltransferase 2 genotype affects the  
14  
15 582 incidence of isoniazid and rifampicin-induced hepatotoxicity. *International Journal of*  
16  
17 583 *Tuberculosis and Lung Disease* 2000;4:256-61.
- 18 584 60. Possuelo LG, Castelan JA, de Brito TC, *et al.* Association of slow N-acetyltransferase 2  
19  
20 585 profile and anti-TB drug-induced hepatotoxicity in patients from Southern Brazil.  
21  
22 586 *European Journal of Clinical Pharmacology* 2008;64:673-81.
- 23 587 61. Rana SV, Ola RP, Sharma SK, *et al.* Comparison between acetylator phenotype and  
24  
25 588 genotype polymorphism of n-acetyltransferase-2 in tuberculosis patients. *Hepatology*  
26  
27 589 *International* 2012;6:397-402.
- 28 590 62. Shimizu Y, Dobashi K, Mita Y, *et al.* DNA microarray genotyping of N-acetyltransferase  
29  
30 591 2 polymorphism using carbodiimide as the linker for assessment of isoniazid hepatotoxicity.  
31  
32 592 *Tuberculosis* 2006;86:374-81.
- 33 593 63. Yuliwulandari R, Susilowati RW, Wicaksono BD, *et al.* NAT2 variants are associated with  
34  
35 594 drug-induced liver injury caused by anti-tuberculosis drugs in Indonesian patients with  
36  
37 595 tuberculosis. *J Hum Genet* 2016; doi:10.1038/jhg.2016.10.
- 38  
39 596 64. Chatterjee S, Lyle N, Mandal A, *et al.* GSTT1 and GSTM1 gene deletions are not  
40  
41 597 associated with hepatotoxicity caused by antitubercular drugs. *Journal of Clinical*  
42  
43 598 *Pharmacy and Therapeutics* 2010;35:465-70.
- 44 599 65. Gupta VH, Singh M, Amarpurkar DN, *et al.* Association of GST null genotypes with anti-  
45  
46 600 tuberculosis drug induced hepatotoxicity in Western Indian population. *Annals of*  
47  
48 601 *Hepatology* 2013;12:959-65.
- 49 602 66. Huang YS, Su WJ, Huang YH, *et al.* Genetic polymorphisms of manganese superoxide  
50  
51 603 dismutase, NAD(P)H : quinone oxidoreductase, glutathione S-transferase M1 and T1, and  
52  
53 604 the susceptibility to drug-induced liver injury. *Journal of Hepatology* 2007;47:128-34.
- 54 605 67. Kim SH, Kim SH, Yoon HJ, *et al.* GSTT1 and GSTM1 null mutations and adverse

- 1  
2  
3  
4 606 reactions induced by antituberculosis drugs in Koreans. *Tuberculosis* 2010;90:39-43.
- 5  
6 607 68. Leiro V, Fernandez-Villar A, Valverde D, *et al.* Influence of glutathione S-transferase M1  
7  
8 608 and T1 homozygous null mutations on the risk of antituberculosis drug-induced  
9  
10 609 hepatotoxicity in a Caucasian population. *Liver International* 2008;28:835-9.
- 11 610 69. Liu F, Jiao AX, Wu XR, *et al.* Impact of Glutathione S-Transferase M1 and T1 on Anti-  
12  
13 611 Tuberculosis Drug-Induced Hepatotoxicity in Chinese Pediatric Patients. *Plos One* 2014;9.
- 14 612 70. Monteiro TP, El-Jaick KB, Jeovanio-Silva AL, *et al.* The roles of GSTM1 and GSTT1 null  
15  
16 613 genotypes and other predictors in anti-tuberculosis drug-induced liver injury. *Journal of*  
17  
18 614 *Clinical Pharmacy and Therapeutics* 2012;37:712-8.
- 19  
20 615 71. Rana SV, Kamboj JK, Sharma SK, *et al.* Antioxidant status and GST gene polymorphisms  
21  
22 616 in antitubercular treatment-induced hepatotoxicity patients. *Hepatol Int* 2013;7:876-82.
- 23 617 72. Roy B, Chowdhury A, Kundu S, *et al.* Increased risk of antituberculosis drug-induced  
24  
25 618 hepatotoxicity in individuals with glutathione S-transferase M1 'null' mutation. *Journal of*  
26  
27 619 *Gastroenterology and Hepatology* 2001;16:1033-7.
- 28 620 73. An HR, Wu XQ, Wang ZY, *et al.* NAT2 and CYP2E1 polymorphisms associated with  
29  
30 621 antituberculosis drug-induced hepatotoxicity in Chinese patients. *Clinical and*  
31  
32 622 *Experimental Pharmacology and Physiology* 2012;39:535-43.
- 33 623 74. Bose PD, Sarma MP, Medhi S, *et al.* Role of polymorphic N-acetyl transferase2 and  
34  
35 624 cytochrome P4502E1 gene in antituberculosis treatment-induced hepatitis. *Journal of*  
36  
37 625 *Gastroenterology and Hepatology* 2011;26:312-8.
- 38  
39 626 75. Chamorro JG, Castagnino JP, Musella RM, *et al.* Sex, ethnicity, and slow acetylator profile  
40  
41 627 are the major causes of hepatotoxicity induced by antituberculosis drugs. *Journal of*  
42  
43 628 *Gastroenterology and Hepatology* 2013;28:323-8.
- 44 629 76. Cho HJ, Koh WJ, Ryu YJ, *et al.* Genetic polymorphisms of NAT2 and CYP2E1 associated  
45  
46 630 with antituberculosis drug-induced hepatotoxicity in Korean patients with pulmonary  
47  
48 631 tuberculosis. *Tuberculosis* 2007;87:551-6.
- 49 632 77. Huang YS, Chern HD, Su WJ, *et al.* Cytochrome p450 2E1 genotype and the susceptibility  
50  
51 633 to antituberculosis drug-induced hepatitis. *Hepatology* 2003;37:924-30.
- 52 634 78. Lee SW, Chung LS, Huang HH, *et al.* NAT2 and CYP2E1 polymorphisms and  
53  
54 635 susceptibility to first-line anti-tuberculosis drug-induced hepatitis. *Int J Tuberc Lung Dis*

- 1  
2  
3  
4 636 2010;14:622-6.
- 5  
6 637 79. Mishra S, Daschakraborty S, Shukla P, *et al.* N-acetyltransferase and cytochrome P450  
7  
8 638 2E1 gene polymorphisms and susceptibility to antituberculosis drug hepatotoxicity in an  
9  
10 639 Indian population. *National Medical Journal of India* 2013;26:260-5.
- 11 640 80. Santos NP, Callegari-Jacques SM, Ribeiro Dos Santos AK, *et al.* N-acetyl transferase 2  
12  
13 641 and cytochrome P450 2E1 genes and isoniazid-induced hepatotoxicity in Brazilian patients.  
14  
15 642 *Int J Tuberc Lung Dis* 2013;17:499-504.
- 16 643 81. Vuilleumier N, Rossier MF, Chiappe A, *et al.* CYP2E1 genotype and isoniazid-induced  
17  
18 644 hepatotoxicity in patients treated for latent tuberculosis. *Eur J Clin Pharmacol*  
19  
20 645 2006;62:423-9.
- 21 646 82. Yamada S, Tang M, Richardson K, *et al.* Genetic variations of NAT2 and CYP2E1 and  
22  
23 647 isoniazid hepatotoxicity in a diverse population. *Pharmacogenomics* 2009;10:1433-45.
- 24  
25 648 83. Zaverucha-do-Valle C, Monteiro SP, El-Jaick KB, *et al.* The role of cigarette smoking and  
26  
27 649 liver enzymes polymorphisms in anti-tuberculosis drug-induced hepatotoxicity in Brazilian  
28  
29 650 patients. *Tuberculosis (Edinb)* 2014;94:299-305.
- 30 651 84. Sharma SK, Jha BK, Sharma A, *et al.* Genetic polymorphisms of CYP2E1 and GSTM1  
31  
32 652 loci and susceptibility to anti-tuberculosis drug-induced hepatotoxicity. *International*  
33  
34 653 *Journal of Tuberculosis and Lung Disease* 2014;18:588-93.
- 35 654 85. Wang T, Yu HT, Wang W, *et al.* Genetic Polymorphisms of Cytochrome P450 and  
36  
37 655 Glutathione S-transferase Associated with Antituberculosis Drug-induced Hepatotoxicity  
38  
39 656 in Chinese Tuberculosis Patients. *Journal of International Medical Research* 2010;38:977-  
40  
41 657 86.
- 42 658 86. Tang SW, Lv XZ, Zhang Y, *et al.* CYP2E1, GSTM1 and GSTT1 genetic polymorphisms  
43  
44 659 and susceptibility to antituberculosis drug-induced hepatotoxicity: a nested case-control  
45  
46 660 study. *Journal of Clinical Pharmacy and Therapeutics* 2012;37:588-93.
- 47 661 87. Brito TC, Possuelo LG, Valim ARM, *et al.* Polymorphisms in CYP2E1, GSTM1 and  
48  
49 662 GSTT1 and anti-tuberculosis drug-induced hepatotoxicity. *Anais Da Academia Brasileira*  
50  
51 663 *De Ciencias* 2014;86:855-65.
- 52 664 88. Forestiero FJ, Cecon L, Hirata MH, *et al.* Relationship of NAT2, CYP2E1 and  
53  
54 665 GSTM1/GSTT1 polymorphisms with mild elevation of liver enzymes in Brazilian

- 1  
2  
3  
4 666 individuals under anti-tuberculosis drug therapy. *Clinica Chimica Acta* 2013;415:215-9.  
5  
6 667 89. Rana SV, Sharma SK, Ola RP, *et al.* N-acetyltransferase 2, cytochrome P4502E1 and  
7  
8 668 glutathione S-transferase genotypes in antitubercular treatment-induced hepatotoxicity in  
9  
10 669 North Indians. *J Clin Pharm Ther* 2014;39:91-6.  
11 670 90. Sotsuka T, Sasaki Y, Hirai S, *et al.* Association of Isoniazid-metabolizing Enzyme  
12  
13 671 Genotypes and Isoniazid-induced Hepatotoxicity in Tuberculosis Patients. *In Vivo*  
14  
15 672 2011;25:803-12.  
16 673 91. Teixeira RL, Morato RG, Cabello PH, *et al.* Genetic polymorphisms of NAT2, CYP2E1  
17  
18 674 and GST enzymes and the occurrence of antituberculosis drug-induced hepatitis in  
19  
20 675 Brazilian TB patients. *Mem Inst Oswaldo Cruz* 2011;106:716-24.  
21 676 92. Xiang Y, Ma L, Wu WD, *et al.* The Incidence of Liver Injury in Uyghur Patients Treated  
22  
23 677 for TB in Xinjiang Uyghur Autonomous Region, China, and Its Association with Hepatic  
24  
25 678 Enzyme Polymorphisms NAT2, CYP2E1, GSTM1 and GSTT1. *Plos One* 2014;9.  
26  
27 679  
28  
29  
30  
31  
32  
33  
34  
35  
36  
37  
38  
39  
40  
41  
42  
43  
44  
45  
46  
47  
48  
49  
50  
51  
52  
53  
54  
55  
56  
57  
58  
59  
60

## Supporting information

Additional supporting information can be found in the online version of this article:

**S1 Table. Completed MOOSE (Meta-analysis Of Observational Studies in Epidemiology) checklist**

**S2 Table. Search strategies**

**S3 Table. Study quality assessment**

**S4 Table. Genotype distribution and the genotyping method used for the *CYP2E1* genetic polymorphisms in the included studies (n = 26)**

**S5 Table. Genotype distribution and the genotyping method used for the *NAT2* genetic polymorphism in the included studies (n = 35)**

**S6 Table. Genotype distribution and the genotyping method used for the *GST* genetic polymorphisms in the included studies (n = 19)**

**S7 Table. Genotype distribution and the genotyping method used for the *SLCO1B1* genetic polymorphisms in the included studies (n = 4)**

**S8 Figure. Funnel plots to evaluate publication bias for the *CYP2E1*, *NAT2*, *GST*, and *SLCO1B1* polymorphisms associated with the risk of anti-tuberculosis drug-induced liver injury. (A) *CYP2E1* *RsaI/PstI* polymorphism, (B) *CYP2E1* *DraI* polymorphism, (C) *NAT2* polymorphism, (D) *GSTM1* polymorphism, (E) *GSTT1* polymorphism, (F) *GSTT1/MI* polymorphism, and (G) *SLCO1B1* 388A>G and 521T>C polymorphism.**

**S9 Table. Subgroup analysis for the association between *CYP2E1* polymorphisms and the risk of anti-tuberculosis drug-induced liver injury based on ethnicity, anti-tuberculosis drug regimen, and study design**

1  
2  
3  
4 702 **S10 Table. Subgroup analysis for the association between *NAT2* polymorphism and the risk**  
5  
6 703 **of anti-tuberculosis drug-induced liver injury based on ethnicity, anti-tuberculosis drug**  
7  
8 704 **regimen, and study design**

9  
10  
11 705 **S11 Table. Subgroup analysis for the association between *GST* polymorphisms and the risk**  
12 706 **of anti-tuberculosis drug-induced liver injury based on ethnicity, anti-tuberculosis drug**  
13 707 **regimen, and study design**

14  
15  
16 708

17  
18  
19  
20  
21  
22  
23  
24  
25  
26  
27  
28  
29  
30  
31  
32  
33  
34  
35  
36  
37  
38  
39  
40  
41  
42  
43  
44  
45  
46  
47  
48  
49  
50  
51  
52  
53  
54  
55  
56  
57  
58  
59  
60

For peer review only

1  
2  
3  
4  
5 709 **Figure legends**

6  
7 710 **Figure 1.** Study selection process flowchart.

8  
9 711 **Figure 2.** Risk of anti-tuberculosis drug-induced liver injury in patients with the *CYP2E1* (A)  
10 712 *RsaI/PstI* c1/c1 genotype compared to c1/c2 + c2/c2 genotypes and (B) *DraI* D/D genotype  
11  
12  
13  
14 713 compared to D/C + C/C genotypes.

15  
16 714 **Figure 3.** Risk of anti-tuberculosis drug-induced liver injury in patients with the *NAT2* slow  
17  
18  
19 715 acetylator genotype compared to those with the intermediate/fast acetylator genotypes.

20  
21 716 **Figure 4.** Risk of anti-tuberculosis drug-induced liver injury in patients with (A) the *GSTM1* null  
22  
23 717 genotype compared to the non-null genotype, (B) the *GSTT1* null genotype compared to the non-  
24  
25  
26 718 null genotype, and (C) the *GSTM1/GSTT1* dual-null genotype compared to the one- and non-null  
27  
28 719 genotypes.

29  
30 720  
31  
32  
33  
34  
35  
36  
37  
38  
39  
40  
41  
42  
43  
44  
45  
46  
47  
48  
49  
50  
51  
52  
53  
54  
55  
56  
57  
58  
59  
60

**Table 1.** Characteristics of the studies included in the meta-analysis (n = 54 studies)

| Last name of the first author, year | Polymorphic gene | Study design | Ethnicity | Sample size (case/control) | Age (years) (case/control) <sup>a</sup> | Male (%) (case/control) | Anti-TB drug regimen administered | Diagnostic criteria of ATDILI | Quality score <sup>d</sup> |
|-------------------------------------|------------------|--------------|-----------|----------------------------|-----------------------------------------|-------------------------|-----------------------------------|-------------------------------|----------------------------|
| Feng, 2014 <sup>23</sup>            | <i>CYP2E1</i>    | Case-control | Chinese   | 173/173                    | 48.8/48.6                               | 68.0/68.0               | INH, RIF, PZA                     | ALT > 3 × ULN                 | 6                          |
| Kim, 2009 <sup>48</sup>             | <i>CYP2E1</i>    | Case-control | Korean    | 67/159                     | 42.1/42.8                               | 65.7/65.4               | INH, RIF, PZA, EMB                | ALT > 2 × ULN                 | 7                          |
| Singh, 2014 <sup>49</sup>           | <i>CYP2E1</i>    | Cohort       | Indian    | 50/135                     | NA/NA                                   | NA/NA                   | NA                                | ALT > 2 × ULN                 | 7                          |
| Tang, 2013 <sup>50</sup>            | <i>CYP2E1</i>    | Case-control | Chinese   | 89/356                     | 43.7/43.6                               | 73.0/73.0               | INH, RIF, PZA, EMB                | ALT > 2 × ULN                 | 7                          |
| Ben Mahmoud, 2012 <sup>51</sup>     | <i>NAT2</i>      | Cohort       | Tunisian  | 14/52                      | 42.4/42.1                               | 42.8/48.1               | INH, RIF containing regimen       | ALT > 2 × ULN                 | 7                          |
| Bozok Cetintas, 2008 <sup>52</sup>  | <i>NAT2</i>      | Case-control | Turkish   | 30/70                      | 39.8/37.3                               | 50.0/72.8               | INH, RIF, PZA, EMB                | ALT > 3 × ULN                 | 6                          |
| Higuchi, 2007 <sup>53</sup>         | <i>NAT2</i>      | Cohort       | Japanese  | 18/82                      | 60.8/64.7                               | 50.0/57.3               | INH, RIF containing regimen       | ALT > 2 × ULN                 | 7                          |
| Ho, 2013 <sup>54</sup>              | <i>NAT2</i>      | Cohort       | Taiwanese | 20/328                     | NA/NA                                   | NA/NA                   | INH, RIF, PZA, EMB                | ALT > 5 × ULN                 | 6                          |
| Huang, 2002 <sup>55</sup>           | <i>NAT2</i>      | Cohort       | Taiwanese | 33/191                     | 73.3/63.7                               | 87.9/88.5               | INH, RIF, PZA, EMB                | ALT > 2 × ULN                 | 7                          |
| Khalili, 2011 <sup>56</sup>         | <i>NAT2</i>      | Case-control | Iranian   | 14/36                      | NA/NA                                   | NA/NA                   | INH, RIF, PZA, EMB                | ALT > 3 × ULN                 | 6                          |
| Leiro-Fernandez, 2011 <sup>57</sup> | <i>NAT2</i>      | Case-control | Caucasian | 50/67                      | 34.0/30.5 <sup>b</sup>                  | 54.0/56.7               | INH, RIF, PZA                     | ALT > 3 × ULN                 | 7                          |
| Ly, 2012 <sup>24</sup>              | <i>NAT2</i>      | Case-        | Chinese   | 89/356                     | 42.0/42.0 <sup>b</sup>                  | 73.0/73.0               | INH, RIF, PZA,                    | ALT > 2 × ULN                 | 7                          |



|                                      |                     |              |            |        |                        |           |                        |                 |   |
|--------------------------------------|---------------------|--------------|------------|--------|------------------------|-----------|------------------------|-----------------|---|
|                                      |                     | control      |            |        |                        |           | EMB                    |                 |   |
| Ng, 2014 <sup>58</sup>               | <i>NAT2</i>         | Case-control | Mixed      | 26/101 | 48.3/NA                | 38.5/NA   | INH containing regimen | ALT > 5 × ULN   | 7 |
| Ohno, 2000 <sup>59</sup>             | <i>NAT2</i>         | Cohort       | Japanese   | 14/63  | NA/NA                  | NA/NA     | INH, RIF               | ALT > 1.5 × ULN | 7 |
| Possuelo, 2008 <sup>60</sup>         | <i>NAT2</i>         | Cohort       | Brazilian  | 14/240 | 38.9/36.5              | 50.0/66.9 | INH, RIF, PZA          | ALT > 3 × ULN   | 7 |
| Rana, 2012 <sup>61</sup>             | <i>NAT2</i>         | Cohort       | Indian     | 50/201 | 45.3/43.8              | 76.0/57.2 | INH, RIF, PZA, EMB     | ALT > 5 × ULN   | 7 |
| Shimizu, 2006 <sup>62</sup>          | <i>NAT2</i>         | Case-control | Japanese   | 10/32  | 60.5/64.9              | 70.0/46.9 | INH, RIF               | ALT > 2 × ULN   | 6 |
| Yuliwulandari, 2016 <sup>63</sup>    | <i>NAT2</i>         | Case-control | Indonesian | 50/191 | NA/NA                  | NA/NA     | NA                     | ALT > 2 × ULN   | 7 |
| Wattanapokayakit, 2016 <sup>25</sup> | <i>NAT2</i>         | Case-control | Thai       | 53/85  | 51.4/50.2              | 58.5/60.0 | INH containing regimen | ALT > 2 × ULN   | 7 |
| Chatterjee, 2010 <sup>64</sup>       | <i>GSTMI, GSTTI</i> | Case-control | Indian     | 51/100 | 37.2/33.2              | 49.0/63.0 | INH, RIF, PZA          | ALT > 3 × ULN   | 7 |
| Gupta, 2013 <sup>65</sup>            | <i>GSTMI, GSTTI</i> | Cohort       | Indian     | 50/246 | 37.0/36.5 <sup>b</sup> | 48.0/56.5 | INH, RIF, PZA, EMB     | ALT > 2 × ULN   | 7 |
| Huang, 2007 <sup>66</sup>            | <i>GSTMI, GSTTI</i> | Case-control | Taiwanese  | 63/63  | 62.0/NA                | NA/NA     | NA                     | ALT > 5 × ULN   | 6 |
| Kim, 2010 <sup>67</sup>              | <i>GSTMI, GSTTI</i> | Case-control | Korean     | 57/190 | 47.3/42.4              | 59.6/67.9 | INH, RIF, PZA, EMB     | ALT > 3 × ULN   | 7 |
| Leiro, 2008 <sup>68</sup>            | <i>GSTMI, GSTTI</i> | Case-control | Caucasian  | 35/60  | 34.0/31.0 <sup>b</sup> | 40.0/41.7 | INH, RIF, PZA          | ALT > 3 × ULN   | 7 |
| Liu, 2014 <sup>69</sup>              | <i>GSTMI, GSTTI</i> | Case-control | Chinese    | 20/143 | 35.9/61.2              | 60.0/59.4 | INH containing regimen | ALT > 2 × ULN   | 7 |
| Monteiro, 2012 <sup>70</sup>         | <i>GSTMI, GSTTI</i> | Cohort       | Brazilian  | 59/118 | 37.0/38.0 <sup>b</sup> | 76.0/61.0 | NA                     | ALT > 2 × ULN   | 7 |

|                              |                     |              |                        |         |                        |           |                    |               |   |
|------------------------------|---------------------|--------------|------------------------|---------|------------------------|-----------|--------------------|---------------|---|
| Rana, 2013 <sup>71</sup>     | <i>GSTM1, GSTT1</i> | Cohort       | Indian                 | 30/220  | 43.6/42.3              | 60.0/64.5 | INH, RIF           | ALT > 5 × ULN | 6 |
| Roy, 2001 <sup>72</sup>      | <i>GSTM1, GSTT1</i> | Case-control | Indian                 | 33/33   | NA/NA                  | NA/NA     | INH, RIF, PZA, EMB | ALT > 2 × ULN | 7 |
| Chen, 2015 <sup>42</sup>     | <i>SLCO1B1</i>      | Case-control | Chinese                | 89/356  | 43.7/43.6              | 73.0/73.0 | INH, RIF, PZA, EMB | ALT > 2 × ULN | 7 |
| Kim, 2012 <sup>10</sup>      | <i>SLCO1B1</i>      | Case-control | Korean                 | 67/159  | 43.0/42.8              | 65.7/65.4 | INH, RIF, PZA, EMB | ALT > 2 × ULN | 7 |
| Li, 2012 <sup>28</sup>       | <i>SLCO1B1</i>      | Case-control | Chinese                | 118/155 | 40.5/39.3              | 48.3/54.8 | RIF                | ALT > 3 × ULN | 7 |
| An, 2012 <sup>73</sup>       | <i>NAT2, CYP2E1</i> | Case-control | Chinese                | 101/107 | 36.0/33.4 <sup>b</sup> | 55.0/70.0 | INH, RIF, PZA, EMB | ALT > 2 × ULN | 7 |
| Bose, 2011 <sup>74</sup>     | <i>NAT2, CYP2E1</i> | Cohort       | Indian                 | 41/177  | 38.0/36.0              | 43.9/47.4 | INH, RIF, PZA, EMB | ALT > 2 × ULN | 7 |
| Chamorro, 2013 <sup>75</sup> | <i>NAT2, CYP2E1</i> | Cohort       | Mixed (South American) | 47/128  | 29.0/27.0              | 41.3/64.8 | INH, RIF, PZA, EMB | ALT > 3 × ULN | 7 |
| Cho, 2007 <sup>76</sup>      | <i>NAT2, CYP2E1</i> | Cohort       | Korean                 | 18/114  | 51.2/46.7              | 66.7/55.3 | INH, RIF, PZA, EMB | ALT > 2 × ULN | 7 |
| Gupta, 2013 <sup>27</sup>    | <i>NAT2, CYP2E1</i> | Case-control | Indian                 | 50/165  | 37.0/38.0              | 48.0/60.0 | INH, RIF, PZA, EMB | ALT > 2 × ULN | 7 |
| Huang, 2003 <sup>77</sup>    | <i>NAT2, CYP2E1</i> | Cohort       | Taiwanese              | 49/269  | 70.0/59.0 <sup>b</sup> | 18.4/14.9 | INH, RIF, PZA, EMB | ALT > 2 × ULN | 7 |
| Lee, 2010 <sup>78</sup>      | <i>NAT2, CYP2E1</i> | Cohort       | Taiwanese              | 45/95   | 58.4/54.9              | 60.0/66.3 | INH, RIF, PZA, EMB | ALT > 2 × ULN | 7 |
| Mishra, 2013 <sup>79</sup>   | <i>NAT2, CYP2E1</i> | Case-control | Indian                 | 33/173  | 38.0/NA                | 52.0/NA   | INH, RIF, PZA, EMB | ALT > 3 × ULN | 7 |
| Santos, 2013 <sup>80</sup>   | <i>NAT2,</i>        | Case-        | Brazilian              | 18/252  | 47.7/45.6              | 56.0/49.0 | INH, RIF           | ALT > 3 × ULN | 7 |

|                                        |                                   |              |           |         |                                                      |           |                         |                      |   |
|----------------------------------------|-----------------------------------|--------------|-----------|---------|------------------------------------------------------|-----------|-------------------------|----------------------|---|
|                                        | <i>CYP2E1</i>                     | control      |           |         |                                                      |           |                         |                      |   |
| Vuilleumier, 2006 <sup>81</sup>        | <i>NAT2, CYP2E1</i>               | Case-control | Mixed     | 8/63    | 27-35: 2/22 <sup>c</sup><br>>36 : 5/18 <sup>c</sup>  | 38.0/51.0 | INH                     | AST or ALT > 4 × ULN | 7 |
| Yamada, 2009 <sup>82</sup>             | <i>NAT2, CYP2E1</i>               | Case-control | Mixed     | 23/147  | NA/NA                                                | 13.0/42.9 | INH                     | ALT > 2 × ULN        | 7 |
| Zaverucha-do-Valle, 2014 <sup>83</sup> | <i>NAT2, CYP2E1</i>               | Cohort       | Brazilian | 50/79   | < 40: 28/43 <sup>c</sup><br>> 40: 20/36 <sup>c</sup> | 60.4/72.2 | INH, RIF, PZA           | ALT > 2 × ULN        | 6 |
| Sharma, 2014 <sup>84</sup>             | <i>CYP2E1, GSTM1</i>              | Cohort       | Indian    | 105/185 | 35.2/27.6                                            | 55.7/72.1 | INH, RIF, PZA, EMB      | ALT > 5 × ULN        | 7 |
| Wang, 2010 <sup>85</sup>               | <i>CYP2E1, GSTM1</i>              | Case-control | Chinese   | 104/111 | 48.6/44.7                                            | 67.3/67.6 | INH, RIF, PZA, EMB      | ALT > 2 × ULN        | 7 |
| Tang, 2012 <sup>86</sup>               | <i>CYP2E1, GSTM1, GSTT1</i>       | Case-control | Chinese   | 89/356  | 43.7/43.6                                            | 73.0/73.0 | INH, RIF, PZA, EMB      | ALT > 2 × ULN        | 7 |
| Yimer, 2011 <sup>45</sup>              | <i>NAT2, SLCO1B1</i>              | Cohort       | Ethiopian | 41/160  | NA/NA                                                | NA/NA     | INH, RIF, PZA, EMB      | ALT > 2 × ULN        | 6 |
| Brito, 2014 <sup>87</sup>              | <i>NAT2, CYP2E1, GSTM1, GSTT1</i> | Cohort       | Brazilian | 15/230  | 38.1/36.8                                            | 46.7/NA   | INH, RIF, PZA           | ALT > 3 × ULN        | 7 |
| Forestiero, 2013 <sup>88</sup>         | <i>NAT2, CYP2E1, GSTM1, GSTT1</i> | Cohort       | Brazilian | 59/40   | NA/NA                                                | 49.2/60.0 | INH, RIF, PZA           | ALT > 2.5 × ULN      | 6 |
| Rana, 2014 <sup>89</sup>               | <i>NAT2, CYP2E1, GSTM1, GSTT1</i> | Cohort       | Indian    | 55/245  | 43.6/42.3                                            | 60.0/62.0 | INH, RIF, PZA, EMB      | ALT > 5 × ULN        | 6 |
| Singla, 2014 <sup>26</sup>             | <i>NAT2, CYP2E1, GSTM1,</i>       | Case-control | Indian    | 17/391  | 48.2/32.7                                            | 64.7/61.4 | INH, RIF, PZA, EMB, STM | ALT > 2 × ULN        | 7 |

|                              |                                                                    |              |           |         |           |           |                              |               |   |
|------------------------------|--------------------------------------------------------------------|--------------|-----------|---------|-----------|-----------|------------------------------|---------------|---|
|                              | <i>GSTT1</i>                                                       |              |           |         |           |           |                              |               |   |
| Sotsuka, 2011 <sup>90</sup>  | <i>NAT2</i> ,<br><i>CYP2E1</i> ,<br><i>GSTM1</i> ,<br><i>GSTT1</i> | Case-control | Japanese  | 20/92   | 54.9/50.4 | 90.0/73.9 | INH, RIF, PZA,<br>EMB or STM | ALT > 3 × ULN | 7 |
| Teixeira, 2011 <sup>91</sup> | <i>NAT2</i> ,<br><i>CYP2E1</i> ,<br><i>GSTM1</i> ,<br><i>GSTT1</i> | Case-control | Brazilian | 26/141  | 47.6/43.0 | 61.5/52.5 | INH containing regimen       | ALT > 3 × ULN | 7 |
| Xiang, 2014 <sup>92</sup>    | <i>NAT2</i> ,<br><i>CYP2E1</i> ,<br><i>GSTM1</i> ,<br><i>GSTT1</i> | Cohort       | Chinese   | 89/2155 | 37.0/44.5 | 67.4/55.7 | INH, RIF, PZA,<br>EMB        | ALT > 2 × ULN | 7 |

Abbreviations: **ALT**, alanine aminotransferase; **AST**, aspartate aminotransferase; **ATDILI**, anti-tuberculosis drug-induced liver injury; **CYP2E1**, cytochrome P450 2E1; **EMB**, ethambutol; **GSTM1**, glutathione S-transferase Mu 1; **GSTT1**, glutathione S-transferase Theta 1; **INH**, isoniazid; **NA**, not available; **NAT2**, N-acetyltransferase 2; **PZA**, pyrazinamide; **RIF**, rifampicin; **SLCO1B1**, solute carrier organic anion transporter family, member 1B1 (encoding organic anion transporting polypeptide 1B1 [OATP1B1]); **STM**, streptomycin; **TB**, tuberculosis; **ULN**, upper limit of normal

<sup>a</sup> Mean unless otherwise stated

<sup>b</sup> Median age

<sup>c</sup> Number of individuals in the age ranges

<sup>d</sup> Detailed scoring for each quality assessment criterion based on the revised Little's recommendation in supplementary data S2 Table.

**Table 2. Association between the *SLCO1B1* polymorphisms and the risk of anti-tuberculosis drug-induced liver injury**

| Polymorphism                                   | Genetic model                  | Number of studies | OR (95% CI)       | P value | I <sup>2</sup> , % | P <sub>heterogeneity</sub> | Model of meta-analysis |
|------------------------------------------------|--------------------------------|-------------------|-------------------|---------|--------------------|----------------------------|------------------------|
| <i>SLCO1B1</i> 388A>G (rs2306283)              | dominant model AA + AG vs.GG   | 4                 | 1.00 [0.76, 1.31] | 1.00    | 0                  | 0.73                       | Fixed                  |
|                                                | recessive model AA vs. AG + GG | 4                 | 1.45 [0.93, 2.25] | 0.10    | 0                  | 0.84                       | Fixed                  |
|                                                | additive model AA vs. GG       | 4                 | 1.36 [0.85, 2.15] | 0.20    | 0                  | 0.98                       | Fixed                  |
| <i>SLCO1B1</i> 521T>C <sup>c</sup> (rs4149056) | dominant model CC + TC vs. TT  | 4                 | 0.74 [0.43, 1.28] | 0.28    | 66                 | 0.03                       | Random                 |
|                                                | recessive model CC vs. TC + TT | 4                 | 1.21 [0.40, 3.64] | 0.73    | 0                  | 0.57                       | Fixed                  |
|                                                | additive model CC vs. TT       | 4                 | 1.27 [0.42, 3.84] | 0.67    | 0                  | 0.61                       | Fixed                  |

Abbreviations: **OR**, odds ratio; **CI**, confidence interval

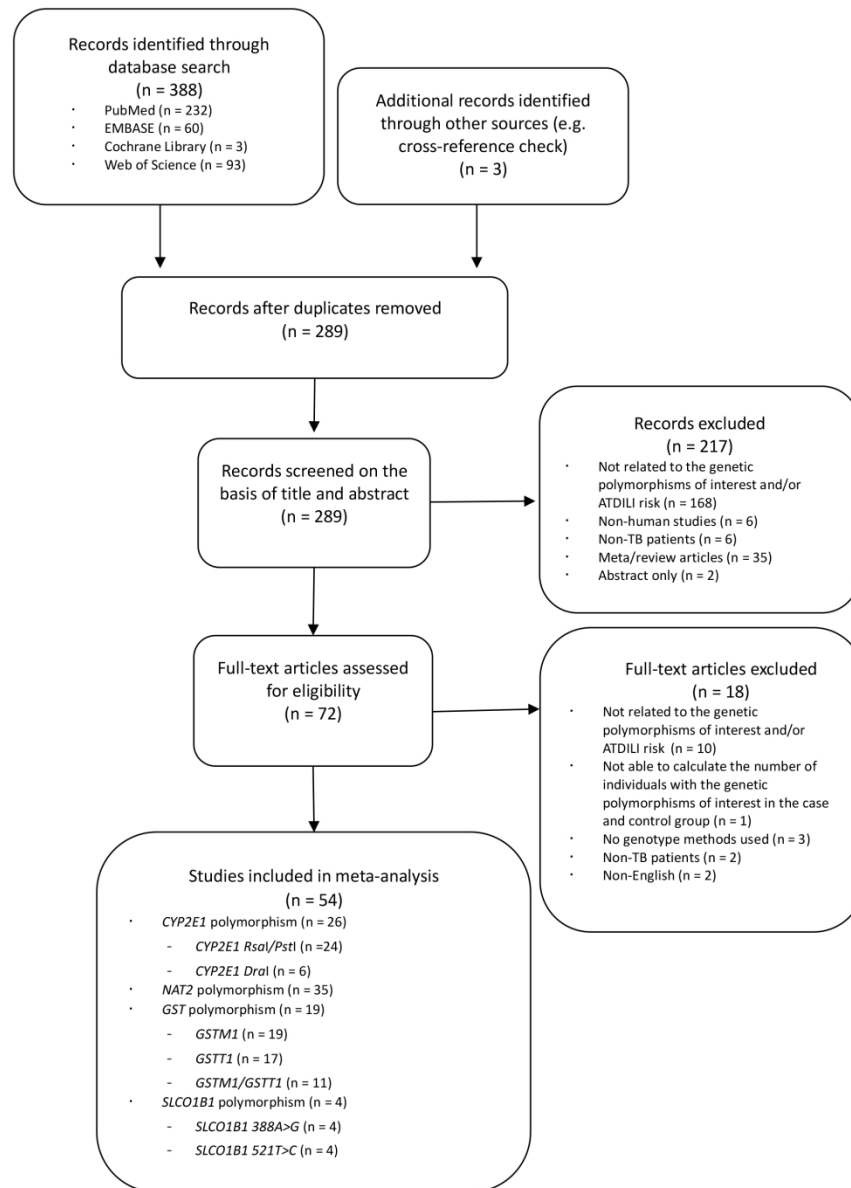

Study selection process flowchart.

(A) *CYP2E1* RsaI/PstI c1/c1 genotype compared to c1/c2 + c2/c2 genotypes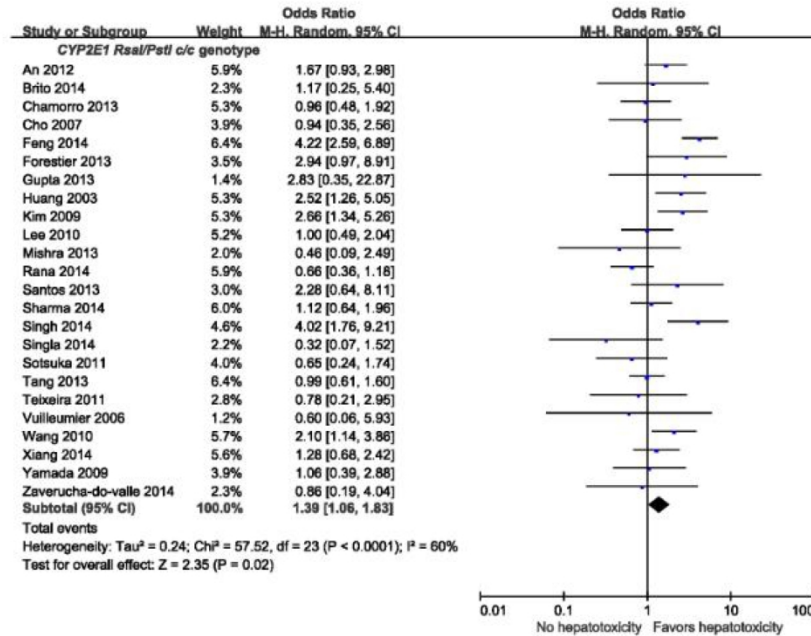(B) *CYP2E1* DraI D/D genotype compared to D/C + C/C genotypes.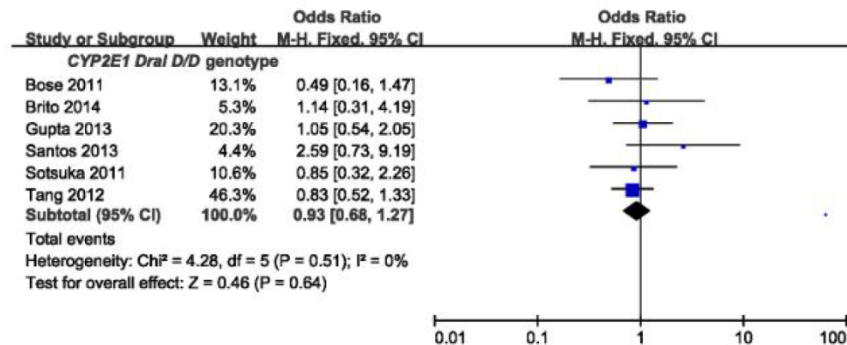

Risk of anti-tuberculosis drug-induced liver injury in patients with the *CYP2E1* (A) RsaI/PstI c1/c1 genotype compared to c1/c2 + c2/c2 genotypes and (B) DraI D/D genotype compared to D/C + C/C genotypes.

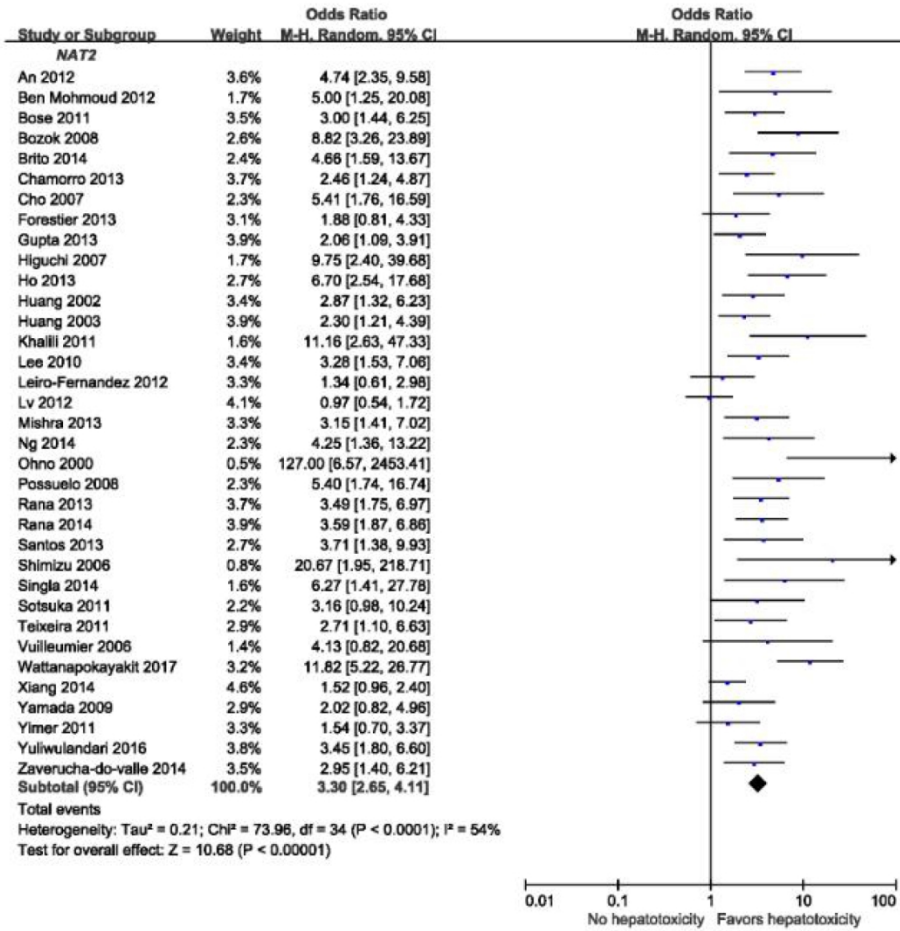

Risk of anti-tuberculosis drug-induced liver injury in patients with the NAT2 slow acetylator genotype compared to those with the intermediate/fast acetylator genotypes.



(A) *GSTM1* null genotype compared to the non-null genotype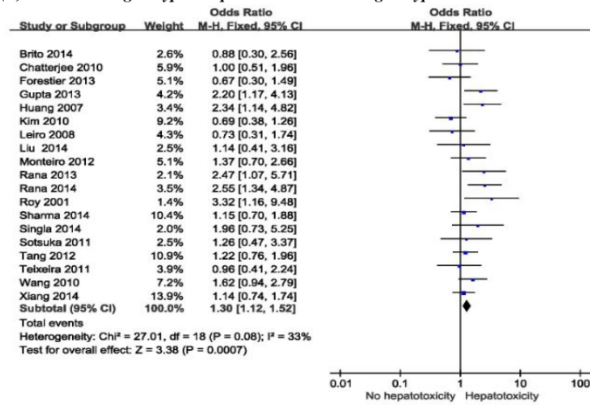(B) *GSTT1* null genotype compared to the non-null genotype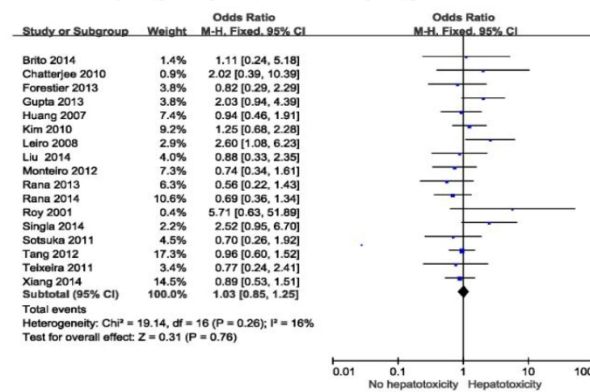(C) *GSTM1/GSTT1* dual-null genotype compared to the one- and non-null genotypes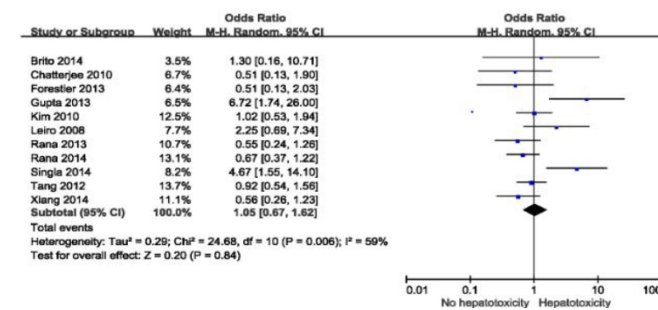

Risk of anti-tuberculosis drug-induced liver injury in patients with (A) the *GSTM1* null genotype compared to the non-null genotype, (B) the *GSTT1* null genotype compared to the non-null genotype, and (C) the *GSTM1/GSTT1* dual-null genotype compared to the one- and non-null genotypes.

## Supplementary data

### S1 Table. Completed MOOSE (Meta-analysis Of Observational Studies in Epidemiology) checklist

| Item No                                     | Recommendation                                                                                                                                                                                                                                                               | Reported on Page No   |
|---------------------------------------------|------------------------------------------------------------------------------------------------------------------------------------------------------------------------------------------------------------------------------------------------------------------------------|-----------------------|
| Reporting of background should include      |                                                                                                                                                                                                                                                                              |                       |
| 1                                           | Problem definition                                                                                                                                                                                                                                                           | 7                     |
| 2                                           | Hypothesis statement (Objectives)                                                                                                                                                                                                                                            | 7                     |
| 3                                           | Description of study outcome(s)                                                                                                                                                                                                                                              | 7                     |
| 4                                           | Type of exposure or intervention used                                                                                                                                                                                                                                        | NA                    |
| 5                                           | Type of study designs used                                                                                                                                                                                                                                                   | 7                     |
| 6                                           | Study population                                                                                                                                                                                                                                                             | 8-9                   |
| Reporting of search strategy should include |                                                                                                                                                                                                                                                                              |                       |
| 7                                           | Qualifications of searchers (eg, librarians and investigators)                                                                                                                                                                                                               | NA                    |
| 8                                           | Search strategy, including time period included in the synthesis and key words                                                                                                                                                                                               | 8<br>S2 Table         |
| 9                                           | Effort to include all available studies, including contact with authors                                                                                                                                                                                                      | 8                     |
| 10                                          | Databases and registries searched                                                                                                                                                                                                                                            | 8                     |
| 11                                          | Search software used, name and version, including special features used (eg, explosion)                                                                                                                                                                                      | 8                     |
| 12                                          | Use of hand searching (eg, reference lists of obtained articles)                                                                                                                                                                                                             | 8                     |
| 13                                          | List of citations located and those excluded, including justification                                                                                                                                                                                                        | Fig 1                 |
| 14                                          | Method of addressing articles published in languages other than English                                                                                                                                                                                                      | 9                     |
| 15                                          | Method of handling abstracts and unpublished studies                                                                                                                                                                                                                         | 9, Fig 1              |
| 16                                          | Description of any contact with authors                                                                                                                                                                                                                                      | -                     |
| Reporting of methods should include         |                                                                                                                                                                                                                                                                              |                       |
| 17                                          | Description of relevance or appropriateness of studies assembled for assessing the hypothesis to be tested                                                                                                                                                                   | NA                    |
| 18                                          | Rationale for the selection and coding of data (eg, sound clinical principles or convenience)                                                                                                                                                                                | 12                    |
| 19                                          | Documentation of how data were classified and coded (eg, multiple raters, blinding and interrater reliability)                                                                                                                                                               | 12                    |
| 20                                          | Assessment of confounding (eg, comparability of cases and controls in studies where appropriate)                                                                                                                                                                             | NA                    |
| 21                                          | Assessment of study quality, including blinding of quality assessors, stratification or regression on possible predictors of study results                                                                                                                                   | Table 1,<br>S3 Table  |
| 22                                          | Assessment of heterogeneity                                                                                                                                                                                                                                                  | 16                    |
| 23                                          | Description of statistical methods (eg, complete description of fixed or random effects models, justification of whether the chosen models account for predictors of study results, dose-response models, or cumulative meta-analysis) in sufficient detail to be replicated | 10-11                 |
| 24                                          | Provision of appropriate tables and graphics                                                                                                                                                                                                                                 | Table 1-2,<br>Fig 1-4 |

| Reporting of results should include |                                                                     |                       |
|-------------------------------------|---------------------------------------------------------------------|-----------------------|
| 25                                  | Graphic summarizing individual study estimates and overall estimate | Fig 2-4               |
| 26                                  | Table giving descriptive information for each study included        | Table 1               |
| 27                                  | Results of sensitivity testing (eg, subgroup analysis)              | 16,<br>S9-11<br>Table |
| 28                                  | Indication of statistical uncertainty of findings                   | -                     |

For peer review only

S2 Table. Search strategies

| Electronic database | Search strategies                                                                                                                                                                                                                                                                                                                                                                                                                                                                                                                                                                                                                                                                                                                                                                             |
|---------------------|-----------------------------------------------------------------------------------------------------------------------------------------------------------------------------------------------------------------------------------------------------------------------------------------------------------------------------------------------------------------------------------------------------------------------------------------------------------------------------------------------------------------------------------------------------------------------------------------------------------------------------------------------------------------------------------------------------------------------------------------------------------------------------------------------|
| PubMed              | ((((((((("glutathione S transferase") OR GST)) OR ("glutathione S-transferase T1" [Supplementary Concept] OR "glutathione S-transferase M1" [Supplementary Concept])) AND Humans[Mesh] AND English[lang])) OR (((("SLCO1B1 protein, human" [Supplementary Concept] OR "solute carrier organic anion transporter") AND Humans[Mesh] AND English[lang])) OR ("isoniazid acetyltransferase" [Supplementary Concept] OR "ArylamineN-Acetyltransferase"[Mesh] OR "NAT2 protein, human" [Supplementary Concept])) OR "Cytochrome P-450 CYP2E1"[Mesh] OR #51) OR "Genetic Predisposition to Disease"[Mesh] AND ("Drug-Induced Liver Injury"[Mesh] OR "Drug-Induced Liver Injury, Chronic"[Mesh])) AND (((("AntitubercularAgents"[Mesh]) OR tuberculosis OR antituberculo*)) Filters: Humans; English |
| EMBASE              | 'solute carrier organic anion transporter 1b1'/expOR 'solute carrier organic anion transporter 1b1' OR 'multidrug resistance protein 1'/expOR 'multidrug resistance protein 1' OR 'organic anion transporter'/expOR 'organic anion transporter' AND [humans]/limAND [english]/limOR slco1b1 OR 'drug transporter gene*' OR abcb1 AND ('hepatitis'/expOR hepatitis OR 'liver toxicity'/expOR ('drug induced' AND ('liver'/expOR liver) AND ('toxicity'/expOR toxicity)) OR 'toxic hepatitis'/expOR 'hepatotoxicity'/expOR hepatotoxicity) AND ('tuberculostaticagent'/expOR 'tuberculostaticagent' OR antituberculosisOR 'isoni*' OR 'rifampi*') AND [humans]/limAND [english]/lim                                                                                                             |
| Web of Science      | ((((("Glutathione S transferase") OR GST) OR GSTT1) OR GSTM1) OR (((NAT2) OR "arylamineN acetyltransferase") OR N acetyltransferase*) OR ((drug metaboli?er*) OR (drug metabli?ingenzyme*)) OR ("Cytochrome 2E1") OR "CYP 2E1") OR ("The solute carrier organic anion transporter family member 1B1") OR SLCO1B1) OR (genotyp* OR acetylator*) OR (gene* susceptibilit*) OR (*polymorphism*) AND ((drug NEAR/3 liver) OR (hepatotoxi*) OR (drug induced liver injury) OR (hepatitis)) AND ((rifampi*) OR (isoni*) OR (antituberculosis) OR ("antitubercul* agent* "))                                                                                                                                                                                                                         |
| Cochrane Reviews    | [AntitubercularAgents] explode all trees AND [Drug-Induced Liver Injury] explode all trees AND ([Cytochrome P-450 CYP2E1] explode all trees OR nat2 OR "N acetyltrasferase" " glutathione S transferase" OR GST OR GSTM1 OR GSTT1 "Solute carrier organic anion transporter" OR SLCO1B1)(Limitation : Trials)                                                                                                                                                                                                                                                                                                                                                                                                                                                                                 |

**S3 Table. Study quality assessment**

| Studies                              | Scientific design | Definite inclusion of study population <sup>a</sup> | Explicit information on study population <sup>a</sup> | Explicit diagnostic criteria on ATDILI <sup>a</sup> | Genetic detection method <sup>a</sup> | Correct statistical analysis <sup>a</sup> | Logical discussion of study bias <sup>a</sup> |
|--------------------------------------|-------------------|-----------------------------------------------------|-------------------------------------------------------|-----------------------------------------------------|---------------------------------------|-------------------------------------------|-----------------------------------------------|
| Feng, 2014 <sup>1</sup>              | 1                 | 1                                                   | 1                                                     | 1                                                   | 1                                     | 1                                         | 0                                             |
| Kim, 2009 <sup>2</sup>               | 1                 | 1                                                   | 1                                                     | 1                                                   | 1                                     | 1                                         | 1                                             |
| Singh, 2014 <sup>3</sup>             | 1                 | 1                                                   | 1                                                     | 1                                                   | 1                                     | 1                                         | 1                                             |
| Tang, 2013 <sup>4</sup>              | 1                 | 1                                                   | 1                                                     | 1                                                   | 1                                     | 1                                         | 1                                             |
| Ben Mahmoud, 2012 <sup>5</sup>       | 1                 | 1                                                   | 1                                                     | 1                                                   | 1                                     | 1                                         | 1                                             |
| Bozok Cetintas, 2008 <sup>6</sup>    | 1                 | 1                                                   | 1                                                     | 1                                                   | 1                                     | 0                                         | 1                                             |
| Higuchi, 2007 <sup>7</sup>           | 1                 | 1                                                   | 1                                                     | 1                                                   | 1                                     | 1                                         | 1                                             |
| Ho, 2013 <sup>8</sup>                | 1                 | 1                                                   | 1                                                     | 1                                                   | 1                                     | 1                                         | 0                                             |
| Huang, 2002 <sup>9</sup>             | 1                 | 1                                                   | 1                                                     | 1                                                   | 1                                     | 1                                         | 1                                             |
| Khalili, 2011 <sup>10</sup>          | 1                 | 1                                                   | 1                                                     | 1                                                   | 1                                     | 1                                         | 0                                             |
| Leiro-Fernandez, 2011 <sup>11</sup>  | 1                 | 1                                                   | 1                                                     | 1                                                   | 1                                     | 1                                         | 1                                             |
| Lv, 2012 <sup>12</sup>               | 1                 | 1                                                   | 1                                                     | 1                                                   | 1                                     | 1                                         | 1                                             |
| Ng, 2014 <sup>13</sup>               | 1                 | 1                                                   | 1                                                     | 1                                                   | 1                                     | 1                                         | 1                                             |
| Ohno, 2000 <sup>14</sup>             | 1                 | 1                                                   | 1                                                     | 1                                                   | 1                                     | 1                                         | 1                                             |
| Possuelo, 2008 <sup>15</sup>         | 1                 | 1                                                   | 1                                                     | 1                                                   | 1                                     | 1                                         | 1                                             |
| Rana, 2012 <sup>16</sup>             | 1                 | 1                                                   | 1                                                     | 1                                                   | 1                                     | 1                                         | 1                                             |
| Shimizu, 2006 <sup>17</sup>          | 1                 | 1                                                   | 1                                                     | 1                                                   | 1                                     | 1                                         | 0                                             |
| Yuliwulandari, 2016 <sup>18</sup>    | 1                 | 1                                                   | 1                                                     | 1                                                   | 1                                     | 1                                         | 1                                             |
| Wattanapokayakit, 2016 <sup>19</sup> | 1                 | 1                                                   | 1                                                     | 1                                                   | 1                                     | 1                                         | 1                                             |
| Chatterjee, 2010 <sup>20</sup>       | 1                 | 1                                                   | 1                                                     | 1                                                   | 1                                     | 1                                         | 1                                             |
| Gupta, 2013 <sup>21</sup>            | 1                 | 1                                                   | 1                                                     | 1                                                   | 1                                     | 1                                         | 1                                             |
| Huang, 2007 <sup>22</sup>            | 1                 | 1                                                   | 1                                                     | 1                                                   | 1                                     | 1                                         | 0                                             |
| Kim, 2010 <sup>23</sup>              | 1                 | 1                                                   | 1                                                     | 1                                                   | 1                                     | 1                                         | 1                                             |
| Leiro, 2008 <sup>24</sup>            | 1                 | 1                                                   | 1                                                     | 1                                                   | 1                                     | 1                                         | 1                                             |
| Liu, 2014 <sup>25</sup>              | 1                 | 1                                                   | 1                                                     | 1                                                   | 1                                     | 1                                         | 1                                             |
| Monteiro, 2012 <sup>26</sup>         | 1                 | 1                                                   | 1                                                     | 1                                                   | 1                                     | 1                                         | 1                                             |
| Rana, 2013 <sup>27</sup>             | 1                 | 1                                                   | 1                                                     | 1                                                   | 1                                     | 1                                         | 0                                             |
| Roy, 2001 <sup>28</sup>              | 1                 | 1                                                   | 1                                                     | 1                                                   | 1                                     | 1                                         | 1                                             |
| Chen, 2015 <sup>29</sup>             | 1                 | 1                                                   | 1                                                     | 1                                                   | 1                                     | 1                                         | 1                                             |
| Kim, 2012 <sup>30</sup>              | 1                 | 1                                                   | 1                                                     | 1                                                   | 1                                     | 1                                         | 1                                             |
| Li, 2012 <sup>31</sup>               | 1                 | 1                                                   | 1                                                     | 1                                                   | 1                                     | 1                                         | 1                                             |
| An, 2012 <sup>32</sup>               | 1                 | 1                                                   | 1                                                     | 1                                                   | 1                                     | 1                                         | 1                                             |
| Bose, 2011 <sup>33</sup>             | 1                 | 1                                                   | 1                                                     | 1                                                   | 1                                     | 1                                         | 1                                             |

|                                        |   |   |   |   |   |   |   |
|----------------------------------------|---|---|---|---|---|---|---|
| Chamorro, 2013 <sup>34</sup>           | 1 | 1 | 1 | 1 | 1 | 1 | 1 |
| Cho, 2007 <sup>35</sup>                | 1 | 1 | 1 | 1 | 1 | 1 | 1 |
| Gupta, 2013 <sup>36</sup>              | 1 | 1 | 1 | 1 | 1 | 1 | 1 |
| Huang, 2003 <sup>37</sup>              | 1 | 1 | 1 | 1 | 1 | 1 | 1 |
| Lee, 2010 <sup>38</sup>                | 1 | 1 | 1 | 1 | 1 | 1 | 1 |
| Mishra, 2013 <sup>39</sup>             | 1 | 1 | 1 | 1 | 1 | 1 | 1 |
| Santos, 2013 <sup>40</sup>             | 1 | 1 | 1 | 1 | 1 | 1 | 1 |
| Vuilleumier, 2006 <sup>41</sup>        | 1 | 1 | 1 | 1 | 1 | 1 | 1 |
| Yamada, 2009 <sup>42</sup>             | 1 | 1 | 1 | 1 | 1 | 1 | 1 |
| Zaverucha-do-Valle, 2014 <sup>43</sup> | 1 | 1 | 1 | 1 | 1 | 1 | 0 |
| Sharma, 2014 <sup>44</sup>             | 1 | 1 | 1 | 1 | 1 | 1 | 1 |
| Wang, 2010 <sup>45</sup>               | 1 | 1 | 1 | 1 | 1 | 1 | 1 |
| Tang, 2012 <sup>46</sup>               | 1 | 1 | 1 | 1 | 1 | 1 | 1 |
| Yimer, 2011 <sup>47</sup>              | 1 | 1 | 1 | 1 | 1 | 1 | 0 |
| Brito, 2014 <sup>48</sup>              | 1 | 1 | 1 | 1 | 1 | 1 | 1 |
| Forestiero, 2013 <sup>49</sup>         | 1 | 1 | 1 | 1 | 1 | 1 | 0 |
| Rana, 2014 <sup>50</sup>               | 1 | 1 | 1 | 1 | 1 | 1 | 0 |
| Singla, 2014 <sup>51</sup>             | 1 | 1 | 1 | 1 | 1 | 1 | 1 |
| Sotsuka, 2011 <sup>52</sup>            | 1 | 1 | 1 | 1 | 1 | 1 | 1 |
| Teixeira, 2011 <sup>53</sup>           | 1 | 1 | 1 | 1 | 1 | 1 | 1 |
| Xiang, 2014 <sup>54</sup>              | 1 | 1 | 1 | 1 | 1 | 1 | 1 |

Abbreviation: ATDILI, anti-tuberculosis drug-induced liver injury

<sup>a</sup> 0 indicates 'not mentioned' in the study; 1 indicates 'sufficient information provided' in the study

**S4 Table. Genotype distribution and the genotyping method used for the *CYP2E1* genetic polymorphisms in the included studies (n = 26)**

| Study                    | <i>RsaI/PstI</i> genotype (n = 24) |               |                                     |               | <i>DraI</i> genotype (n = 6)     |           |                                     |            | Genotyping method |
|--------------------------|------------------------------------|---------------|-------------------------------------|---------------|----------------------------------|-----------|-------------------------------------|------------|-------------------|
|                          | Case (number of individuals [%])   |               | Control (number of individuals [%]) |               | Case (number of individuals [%]) |           | Control (number of individuals [%]) |            |                   |
|                          | C1/C1                              | C1/C2 + C2/C2 | C1/C1                               | C1/C2 + C2/C2 | D/D                              | D/C + C/C | D/D                                 | D/C + C/C  |                   |
| An <sup>32</sup>         | 72 (71.3)                          | 29 (28.7)     | 64 (59.8)                           | 43 (40.2)     | NA                               | NA        | NA                                  | NA         | Sequencing        |
| Bose <sup>33</sup>       | NA                                 | NA            | NA                                  | NA            | 4 (9.8)                          | 37 (90.2) | 32 (18.1)                           | 145 (81.9) | PCR-RFLP          |
| Brito <sup>48</sup>      | 13 (86.7)                          | 2 (13.3)      | 195 (84.8)                          | 35 (15.2)     | 12 (80.0)                        | 3 (20.0)  | 179 (76.8)                          | 54 (23.2)  | PCR-RFLP          |
| Chamorro <sup>34</sup>   | 30 (63.8)                          | 17 (36.2)     | 83 (64.8)                           | 45 (35.2)     | NA                               | NA        | NA                                  | NA         | PCR-RFLP          |
| Cho <sup>35</sup>        | 10 (55.6)                          | 8 (44.4)      | 65 (57.0)                           | 49 (43.0)     | NA                               | NA        | NA                                  | NA         | Sequencing        |
| Feng <sup>1</sup>        | 142 (82.1)                         | 31 (17.9)     | 90 (52.0)                           | 83 (48.0)     | NA                               | NA        | NA                                  | NA         | Sequencing        |
| Forestiero <sup>49</sup> | 53 (89.8)                          | 6 (10.2)      | 30 (75.0)                           | 10 (25.0)     | NA                               | NA        | NA                                  | NA         | PCR-RFLP          |
| Gupta <sup>36</sup>      | 49 (98.0)                          | 1 (2.0)       | 156 (94.5)                          | 9 (5.5)       | 33 (66.0)                        | 17 (34.0) | 107 (64.9)                          | 58 (35.1)  | PCR-RFLP          |
| Huang <sup>37</sup>      | 37 (75.5)                          | 12 (24.5)     | 148 (55.0)                          | 121 (45.0)    | NA                               | NA        | NA                                  | NA         | PCR-RFLP          |

|    |                           |           |           |            |            |           |           |            |            |            |
|----|---------------------------|-----------|-----------|------------|------------|-----------|-----------|------------|------------|------------|
| 1  |                           |           |           |            |            |           |           |            |            |            |
| 2  |                           |           |           |            |            |           |           |            |            |            |
| 3  | Kim <sup>2</sup>          | 54 (81.8) | 12 (18.2) | 97 (63.4)  | 56 (36.6)  | NA        | NA        | NA         | NA         | SNP stream |
| 4  |                           |           |           |            |            |           |           |            |            |            |
| 5  |                           |           |           |            |            |           |           |            |            |            |
| 6  | Lee <sup>55</sup>         | 26 (57.8) | 19 (42.2) | 55 (57.9)  | 40 (42.1)  | NA        | NA        | NA         | NA         | Taqman     |
| 7  |                           |           |           |            |            |           |           |            |            |            |
| 8  | Mishra <sup>39</sup>      | 31 (93.9) | 2 (6.1)   | 168 (97.1) | 5 (2.9)    | NA        | NA        | NA         | NA         | PCR-RFLP   |
| 9  |                           |           |           |            |            |           |           |            |            |            |
| 10 |                           |           |           |            |            |           |           |            |            |            |
| 11 | Rana <sup>56</sup>        | 28 (50.9) | 27 (49.1) | 150 (61.2) | 95 (38.8)  | NA        | NA        | NA         | NA         | PCR-RFLP   |
| 12 |                           |           |           |            |            |           |           |            |            |            |
| 13 |                           |           |           |            |            |           |           |            |            |            |
| 14 | Santos <sup>57</sup>      | 15 (83.3) | 3 (16.7)  | 173 (75.6) | 56 (24.4)  | 15 (83.3) | 3 (16.7)  | 166 (72.8) | 62 (27.2)  | Taqman     |
| 15 |                           |           |           |            |            |           |           |            |            |            |
| 16 | Sharma <sup>44</sup>      | 81 (77.1) | 24 (22.9) | 139 (75.1) | 46 (24.9)  | NA        | NA        | NA         | NA         | PCR-RFLP   |
| 17 |                           |           |           |            |            |           |           |            |            |            |
| 18 |                           |           |           |            |            |           |           |            |            |            |
| 19 | Singh <sup>3</sup>        | 42 (84.0) | 8 (16.0)  | 77 (56.6)  | 59 (43.4)  | NA        | NA        | NA         | NA         | PCR-RFLP   |
| 20 |                           |           |           |            |            |           |           |            |            |            |
| 21 |                           |           |           |            |            |           |           |            |            |            |
| 22 | Singla <sup>51</sup>      | 15 (88.0) | 2 (12.0)  | 375 (96.0) | 16 (4.0)   | NA        | NA        | NA         | NA         | PCR-RFLP   |
| 23 |                           |           |           |            |            |           |           |            |            |            |
| 24 |                           |           |           |            |            |           |           |            |            |            |
| 25 | Sotsuka <sup>52</sup>     | 11 (55.0) | 9 (45.0)  | 60 (65.2)  | 32 (34.8)  | 9 (45.0)  | 11 (55.0) | 45 (48.9)  | 47 (51.1)  | PCR-RFLP   |
| 26 |                           |           |           |            |            |           |           |            |            |            |
| 27 |                           |           |           |            |            |           |           |            |            |            |
| 28 | Tang <sup>46</sup>        | NA        | NA        | NA         | NA         | 47 (52.8) | 42 (47.2) | 204 (57.3) | 152 (42.7) | PCR-RFLP   |
| 29 |                           |           |           |            |            |           |           |            |            |            |
| 30 | Tang <sup>4</sup>         | 56 (62.9) | 33 (37.1) | 225 (63.2) | 131 (36.8) | NA        | NA        | NA         | NA         | Taqman     |
| 31 |                           |           |           |            |            |           |           |            |            |            |
| 32 |                           |           |           |            |            |           |           |            |            |            |
| 33 | Teixeira <sup>53</sup>    | 23 (88.5) | 3 (11.5)  | 128 (90.8) | 13 (9.2)   | NA        | NA        | NA         | NA         | PCR-RFLP   |
| 34 |                           |           |           |            |            |           |           |            |            |            |
| 35 |                           |           |           |            |            |           |           |            |            |            |
| 36 | Vuilleumier <sup>41</sup> | 7 (87.5)  | 1 (12.5)  | 58 (92.1)  | 5 (7.9)    | NA        | NA        | NA         | NA         | PCR-RFLP   |
| 37 |                           |           |           |            |            |           |           |            |            |            |
| 38 |                           |           |           |            |            |           |           |            |            |            |
| 39 |                           |           |           |            |            |           |           |            |            |            |
| 40 |                           |           |           |            |            |           |           |            |            |            |
| 41 |                           |           |           |            |            |           |           |            |            |            |
| 42 |                           |           |           |            |            |           |           |            |            |            |
| 43 |                           |           |           |            |            |           |           |            |            |            |
| 44 |                           |           |           |            |            |           |           |            |            |            |
| 45 |                           |           |           |            |            |           |           |            |            |            |
| 46 |                           |           |           |            |            |           |           |            |            |            |



|    |                                  |           |           |             |            |    |    |    |    |                                            |
|----|----------------------------------|-----------|-----------|-------------|------------|----|----|----|----|--------------------------------------------|
| 1  |                                  |           |           |             |            |    |    |    |    |                                            |
| 2  |                                  |           |           |             |            |    |    |    |    |                                            |
| 3  | Wang <sup>45</sup>               | 82 (78.8) | 22 (21.2) | 71 (64.0)   | 40 (36.0)  | NA | NA | NA | NA | PCR-RFLP                                   |
| 4  |                                  |           |           |             |            |    |    |    |    |                                            |
| 5  |                                  |           |           |             |            |    |    |    |    |                                            |
| 6  | Xiang <sup>54</sup>              | 58 (82.9) | 12 (17.1) | 1264 (79.0) | 336 (21.0) | NA | NA | NA | NA | PCR/ligase<br>detection<br>reaction assays |
| 7  |                                  |           |           |             |            |    |    |    |    |                                            |
| 8  |                                  |           |           |             |            |    |    |    |    |                                            |
| 9  | Yamada <sup>42</sup>             | 17 (73.9) | 6 (26.1)  | 107 (72.8)  | 40 (27.2)  | NA | NA | NA | NA | PCR-RFLP                                   |
| 10 |                                  |           |           |             |            |    |    |    |    |                                            |
| 11 |                                  |           |           |             |            |    |    |    |    |                                            |
| 12 | Zaverucha-do-Valle <sup>43</sup> | 48 (94.1) | 3 (5.9)   | 74 (94.9)   | 4 (5.1)    | NA | NA | NA | NA | PCR-RFLP                                   |
| 13 |                                  |           |           |             |            |    |    |    |    |                                            |

Abbreviations: *NA*, not available; *PCR*, polymerase chain reaction; *RFLP*, restriction fragment length polymorphism; *SNP*, single nucleotide polymorphism

**S5 Table. Genotype distribution and the genotyping method used for the *NAT2* genetic polymorphism in the included studies (n = 35)**

| Study                       | Case (number of individuals [%]) |                                  | Control (number of individuals [%]) |                                  | Genotyping method  |
|-----------------------------|----------------------------------|----------------------------------|-------------------------------------|----------------------------------|--------------------|
|                             | Slow acetylator                  | Intermediate and fast acetylator | Slow acetylator                     | Intermediate and fast acetylator |                    |
| An <sup>32</sup>            | 40 (39.6)                        | 61 (60.4)                        | 13 (12.1)                           | 94 (87.9)                        | Sequencing         |
| Ben Mahmoud <sup>5</sup>    | 11 (78.5)                        | 3 (21.5)                         | 22 (42.4)                           | 30 (57.6)                        | PCR-RFLP           |
| Bose <sup>33</sup>          | 29 (70.7)                        | 12 (29.3)                        | 79 (44.6)                           | 98 (55.4)                        | PCR-RFLP           |
| Bozok Cetintas <sup>6</sup> | 23 (76.7)                        | 7 (23.3)                         | 19 (27.1)                           | 51 (72.9)                        | PCR                |
| Brito <sup>48</sup>         | 9 (60.0)                         | 6 (40.0)                         | 56 (24.3)                           | 174 (75.7)                       | PCR-RFLP           |
| Chamorro <sup>34</sup>      | 28 (58.7)                        | 19 (41.3)                        | 48 (37.5)                           | 80 (62.5)                        | PCR-RFLP           |
| Cho <sup>35</sup>           | 7 (38.9)                         | 11 (61.1)                        | 12 (10.5)                           | 102 (89.5)                       | Sequencing         |
| Forestiero <sup>49</sup>    | 28 (47.4)                        | 31 (52.6)                        | 13 (32.5)                           | 27 (67.5)                        | PCR-RFLP           |
| Gupta <sup>36</sup>         | 28 (56.0)                        | 22 (44.0)                        | 63 (38.2)                           | 102 (61.8)                       | PCR-RFLP           |
| Higuchi <sup>7</sup>        | 6 (33.3)                         | 12 (66.7)                        | 4 (4.9)                             | 78 (95.1)                        | PCR-RFLP           |
| Ho <sup>8</sup>             | 12 (63.2)                        | 7 (36.8)                         | 67 (20.4)                           | 262 (79.6)                       | Sequenom MassARRAY |

1  
2  
3  
4  
5  
6  
7  
8  
9  
10  
11  
12  
13  
14  
15  
16  
17  
18  
19  
20  
21  
22  
23  
24  
25  
26  
27  
28  
29  
30  
31  
32  
33  
34  
35  
36  
37  
38  
39  
40  
41  
42  
43  
44  
45  
46

---

|                               |           |           |            |            |            |
|-------------------------------|-----------|-----------|------------|------------|------------|
| Huang <sup>9</sup>            | 14 (42.4) | 19 (57.6) | 39 (20.4)  | 152 (79.6) | PCR-RFLP   |
| Huang <sup>37</sup>           | 19 (38.8) | 30 (61.2) | 58 (21.6)  | 211 (78.4) | PCR-RFLP   |
| Khalili <sup>10</sup>         | 9 (64.3)  | 5 (35.7)  | 5 (13.9)   | 31 (86.1)  | PCR-RFLP   |
| Lee <sup>38</sup>             | 21 (46.7) | 24 (53.3) | 20 (21.1)  | 75 (78.9)  | Taqman     |
| Leiro-Fernandez <sup>11</sup> | 36 (72.0) | 14 (28.0) | 44 (65.7)  | 23 (34.3)  | PCR-RFLP   |
| Lv <sup>58</sup>              | 18 (20.2) | 71 (79.8) | 74 (20.8)  | 282 (79.2) | PCR-RFLP   |
| Mishra <sup>39</sup>          | 23 (70.0) | 10 (30.0) | 73 (42.0)  | 100 (58.0) | PCR-RFLP   |
| Ng <sup>13</sup>              | 22 (84.6) | 4 (15.4)  | 57 (56.4)  | 44 (43.6)  | PCR-RFLP   |
| Ohno <sup>14</sup>            | 7 (50.0)  | 7 (50.0)  | 0 (0.0)    | 63 (100.0) | PCR-RFLP   |
| Possuelo <sup>15</sup>        | 9 (64.3)  | 5 (35.7)  | 60 (25.0)  | 180 (75.0) | Sequencing |
| Rana <sup>16</sup>            | 19 (38.0) | 31 (62.0) | 30 (14.9)  | 171 (85.1) | PCR-RFLP   |
| Rana <sup>50</sup>            | 21 (38.2) | 34 (61.8) | 36 (14.7)  | 209 (85.3) | PCR-RFLP   |
| Santos <sup>40</sup>          | 11 (61.1) | 7 (38.9)  | 75 (29.8)  | 177 (70.2) | Sequencing |
| Shimizu <sup>17</sup>         | 4 (40.0)  | 6 (60.0)  | 1 (3.1)    | 31 (96.9)  | PCR-RFLP   |
| Singla <sup>51</sup>          | 15 (88.2) | 2 (11.8)  | 213 (54.5) | 178 (45.5) | PCR-RFLP   |

---

|                                  |           |           |            |             |                                      |
|----------------------------------|-----------|-----------|------------|-------------|--------------------------------------|
| Sotsuka <sup>52</sup>            | 8 (15.4)  | 44 (84.6) | 5 (5.4)    | 87 (94.6)   | PCR-RFLP                             |
| Teixeira <sup>53</sup>           | 18 (75.0) | 6 (25.0)  | 64 (51.2)  | 61 (48.8)   | Sequencing                           |
| Vuilleumier <sup>41</sup>        | 3 (37.5)  | 5 (62.5)  | 8 (12.7)   | 55 (87.3)   | PCR- RFLP                            |
| Wattanapokayakit <sup>19</sup>   | 38 (71.7) | 15 (28.3) | 15 (17.7)  | 70 (82.3)   | Sequencing                           |
| Xiang <sup>54</sup>              | 28 (31.5) | 61 (68.5) | 501 (23.2) | 1654 (76.8) | PCR/ligase detection reaction assays |
| Yamada <sup>42</sup>             | 14 (60.9) | 9 (39.1)  | 64 (43.5)  | 83 (56.5)   | Sequencing                           |
| Yimer <sup>47</sup>              | 31 (75.6) | 10 (24.4) | 107 (66.9) | 53 (33.1)   | Taqman                               |
| Yuliwulandari <sup>18</sup>      | 32 (64.0) | 18 (36.0) | 65 (34.0)  | 126 (66.0)  | Sequencing                           |
| Zaverucha-do-Valle <sup>43</sup> | 37 (71.2) | 15 (28.8) | 36 (45.6)  | 43 (54.4)   | Sequencing                           |

Abbreviations: *NA*, not available; *PCR*, polymerase chain reaction; *RFLP*, restriction fragment length polymorphism

**S6 Table. Genotype distribution and the genotyping method used for the GST genetic polymorphisms in the included studies (n = 19)**

| Study                    | <i>GSTM1</i> genotype (n = 19)   |              |                                     |               | <i>GSTT1</i> genotype (n = 17)   |              |                                     |               | <i>GSTM1/GSTT1</i> genotype (n = 11) |               |                                     |               | Genotyping method |
|--------------------------|----------------------------------|--------------|-------------------------------------|---------------|----------------------------------|--------------|-------------------------------------|---------------|--------------------------------------|---------------|-------------------------------------|---------------|-------------------|
|                          | Case (number of individuals [%]) |              | Control (number of individuals [%]) |               | Case (number of individuals [%]) |              | Control (number of individuals [%]) |               | Case (number of individuals [%])     |               | Control (number of individuals [%]) |               |                   |
|                          | Null                             | Non-null     | Null                                | Non-null      | Null                             | Non-null     | Null                                | Non-null      | Dual-null                            | One-/non-null | Dual-null                           | One-/non-null |                   |
| Brito <sup>48</sup>      | 6<br>(40.0)                      | 9<br>(60.0)  | 99<br>(43.0)                        | 131<br>(57.0) | 2<br>(13.3)                      | 13<br>(86.7) | 28<br>(12.2)                        | 202<br>(87.8) | 1<br>(6.7)                           | 14<br>(93.3)  | 12<br>(5.2)                         | 218<br>(94.8) | PCR               |
| Chatterjee <sup>20</sup> | 25<br>(49.0)                     | 26<br>(51.0) | 49<br>(49.0)                        | 51<br>(51.0)  | 3<br>(5.9)                       | 48<br>(94.1) | 3<br>(3.0)                          | 97<br>(97.0)  | 3<br>(5.9)                           | 48<br>(94.1)  | 11<br>(11.0)                        | 89<br>(89.0)  | Multiplex<br>PCR  |
| Forestiero <sup>49</sup> | 25<br>(42.4)                     | 34<br>(57.6) | 21<br>(52.5)                        | 19<br>(47.5)  | 10<br>(17.0)                     | 49<br>(83.0) | 8<br>(20.0)                         | 32<br>(80.0)  | 4<br>(6.8)                           | 55<br>(93.2)  | 5<br>(12.5)                         | 35<br>(87.5)  | Multiplex<br>PCR  |
| Gupta <sup>21</sup>      | 21<br>(42.0)                     | 29<br>(58.0) | 61<br>(24.8)                        | 185<br>(75.2) | 11<br>(22.0)                     | 39<br>(78.0) | 30<br>(12.2)                        | 216<br>(87.8) | 5<br>(10.0)                          | 45<br>(90.0)  | 4<br>(1.6)                          | 242<br>(98.4) | Multiplex<br>PCR  |
| Huang <sup>22</sup>      | 42<br>(66.7)                     | 21<br>(33.3) | 29<br>(46.0)                        | 34<br>(54.0)  | 24<br>(38.1)                     | 39<br>(61.9) | 25<br>(39.7)                        | 38<br>(60.3)  | NA                                   | NA            | NA                                  | NA            | Multiplex<br>PCR  |
| Kim <sup>23</sup>        | 26<br>(45.6)                     | 31<br>(54.4) | 104<br>(54.7)                       | 86<br>(45.3)  | 34<br>(59.6)                     | 23<br>(40.4) | 103<br>(54.2)                       | 87<br>(45.8)  | 17<br>(29.8)                         | 40<br>(70.2)  | 56<br>(29.6)                        | 133<br>(70.4) | PCR               |
| Leiro <sup>24</sup>      | 12<br>(34.3)                     | 23<br>(65.7) | 25<br>(41.7)                        | 35<br>(58.3)  | 17<br>(48.6)                     | 18<br>(51.4) | 16<br>(26.7)                        | 44<br>(73.3)  | 7<br>(20.0)                          | 28<br>(80.0)  | 6<br>(10.0)                         | 54<br>(90.0)  | PCR               |
| Liu <sup>25</sup>        | 14<br>(70.0)                     | 6<br>(30.0)  | 96<br>(67.1)                        | 47<br>(32.9)  | 13<br>(65.0)                     | 7<br>(35.0)  | 97<br>(67.8)                        | 46<br>(32.2)  | NA                                   | NA            | NA                                  | NA            | Multiplex<br>PCR  |

|    |                        |        |        |        |        |        |        |        |        |        |        |        |        |           |
|----|------------------------|--------|--------|--------|--------|--------|--------|--------|--------|--------|--------|--------|--------|-----------|
| 1  |                        |        |        |        |        |        |        |        |        |        |        |        |        |           |
| 2  |                        |        |        |        |        |        |        |        |        |        |        |        |        |           |
| 3  | Monteiro               | 21     | 38     | 34     | 84     | 11     | 48     | 28     | 90     | NA     | NA     | NA     | NA     | PCR       |
| 4  | <sup>26</sup>          | (35.6) | (64.4) | (28.8) | (71.2) | (18.7) | (81.3) | (23.8) | (76.2) |        |        |        |        |           |
| 5  |                        |        |        |        |        |        |        |        |        |        |        |        |        |           |
| 6  | Rana <sup>27</sup>     | 10     | 20     | 37     | 183    | 6      | 24     | 68     | 152    | 9      | 21     | 96     | 124    | PCR       |
| 7  |                        | (41.6) | (58.4) | (18.5) | (81.5) | (25.0) | (75.0) | (33.8) | (66.2) | (37.5) | (62.5) | (47.7) | (52.3) |           |
| 8  |                        |        |        |        |        |        |        |        |        |        |        |        |        |           |
| 9  | Rana <sup>16</sup>     | 19     | 36     | 42     | 203    | 14     | 41     | 81     | 164    | 22     | 33     | 122    | 123    | PCR       |
| 10 |                        | (34.5) | (65.5) | (17.1) | (82.9) | (25.5) | (74.5) | (33.1) | (66.9) | (40.0) | (60.0) | (49.8) | (50.2) |           |
| 11 |                        |        |        |        |        |        |        |        |        |        |        |        |        |           |
| 12 | Roy <sup>28</sup>      | 17     | 15     | 8      | 25     | 5      | 28     | 1      | 32     | NA     | NA     | NA     | NA     | PCR       |
| 13 |                        | (52.0) | (48.0) | (24.0) | (76.0) | (15.0) | (85.0) | (3.0)  | (97.0) |        |        |        |        |           |
| 14 |                        |        |        |        |        |        |        |        |        |        |        |        |        |           |
| 15 | Sharma <sup>44</sup>   | 42     | 63     | 68     | 117    | NA     | PCR       |
| 16 |                        | (40.0) | (60.0) | (36.7) | (63.3) |        |        |        |        |        |        |        |        |           |
| 17 |                        |        |        |        |        |        |        |        |        |        |        |        |        |           |
| 18 | Singla <sup>51</sup>   | 10     | 7      | 165    | 226    | 8      | 9      | 102    | 289    | 5      | 12     | 32     | 359    | Multiplex |
| 19 |                        | (59.0) | (41.0) | (42.0) | (58.0) | (47.0) | (53.0) | (26.0) | (74.0) | (29.0) | (71.0) | (8.0)  | (92.0) | PCR       |
| 20 |                        |        |        |        |        |        |        |        |        |        |        |        |        |           |
| 21 | Sotsuka <sup>52</sup>  | 12     | 8      | 50     | 42     | 7      | 13     | 40     | 52     | NA     | NA     | NA     | NA     | PCR       |
| 22 |                        | (60.0) | (40.0) | (54.3) | (45.7) | (35.0) | (65.0) | (43.5) | (56.5) |        |        |        |        |           |
| 23 |                        |        |        |        |        |        |        |        |        |        |        |        |        |           |
| 24 | Tang <sup>46</sup>     | 55     | 34     | 203    | 153    | 40     | 49     | 164    | 192    | 22     | 67     | 94     | 262    | Multiplex |
| 25 |                        | (61.8) | (38.2) | (57.0) | (43.0) | (44.9) | (55.1) | (46.1) | (53.9) | (24.7) | (75.3) | (26.4) | (73.6) | PCR       |
| 26 |                        |        |        |        |        |        |        |        |        |        |        |        |        |           |
| 27 | Teixeira <sup>53</sup> | 11     | 15     | 61     | 80     | 4      | 22     | 27     | 114    | NA     | NA     | NA     | NA     | Multiplex |
| 28 |                        | (42.3) | (57.7) | (43.3) | (56.7) | (15.4) | (84.6) | (19.2) | (80.8) |        |        |        |        | PCR       |
| 29 |                        |        |        |        |        |        |        |        |        |        |        |        |        |           |
| 30 | Wang <sup>45</sup>     | 63     | 41     | 54     | 57     | NA     | PCR       |
| 31 |                        | (60.6) | (39.4) | (48.6) | (51.4) |        |        |        |        |        |        |        |        |           |
| 32 |                        |        |        |        |        |        |        |        |        |        |        |        |        |           |
| 33 | Xiang <sup>54</sup>    | 41     | 48     | 925    | 1230   | 18     | 71     | 477    | 1678   | 7      | 68     | 283    | 1427   | PCR       |
| 34 |                        | (46.1) | (53.9) | (42.9) | (57.1) | (20.2) | (79.8) | (22.1) | (77.9) | (9.3)  | (90.7) | (16.5) | (83.5) |           |

Abbreviations: *NA*, not available; *PCR*, polymerase chain reaction

**S7 Table. Genotype distribution and the genotyping method used for the *SLCO1B1* genetic polymorphisms in the included studies (n = 4)**

Abbreviations: *PCR*, polymerase chain reaction; *SNP*, single nucleotide polymorphism

| Study               | <i>SLCO1B1</i> 388A>G (rs2306283) |              |              |                                     |               |               | <i>SLCO1B1</i> 521T>C (rs4149056) |              |            |                                     |              |            | Genotyping method     |
|---------------------|-----------------------------------|--------------|--------------|-------------------------------------|---------------|---------------|-----------------------------------|--------------|------------|-------------------------------------|--------------|------------|-----------------------|
|                     | Case (number of individuals [%])  |              |              | Control (number of individuals [%]) |               |               | Case (number of individuals [%])  |              |            | Control (number of individuals [%]) |              |            |                       |
|                     | AA                                | AG           | GG           | AA                                  | AG            | GG            | TT                                | CT           | CC         | TT                                  | CT           | CC         |                       |
| Chen <sup>29</sup>  | 8<br>(9.0)                        | 34<br>(38.2) | 47<br>(52.8) | 33<br>(7.5)                         | 164<br>(37.1) | 245<br>(55.4) | 72<br>(80.9)                      | 15<br>(16.9) | 2<br>(2.2) | 351<br>(79.6)                       | 87<br>(19.7) | 3<br>(0.7) | Taqman                |
| Kim <sup>30</sup>   | 6<br>(9.2)                        | 26<br>(40.0) | 33<br>(50.8) | 11<br>(7.1)                         | 60<br>(38.5)  | 85<br>(54.5)  | 46<br>(69.7)                      | 20<br>(30.3) | 0<br>(0.0) | 113<br>(72.4)                       | 40<br>(25.6) | 3<br>(1.9) | SNPstream             |
| Li <sup>31</sup>    | 11<br>(9.3)                       | 38<br>(32.2) | 69<br>(58.5) | 12<br>(7.7)                         | 48<br>(31.0)  | 95<br>(61.3)  | 83<br>(70.3)                      | 34<br>(28.8) | 1<br>(0.8) | 136<br>(87.7)                       | 18<br>(11.6) | 1<br>(0.7) | PCR direct sequencing |
| Yimer <sup>47</sup> | 9<br>(22.0)                       | 17<br>(41.5) | 15<br>(36.6) | 20<br>(12.5)                        | 87<br>(54.4)  | 53<br>(33.1)  | 27<br>(65.9)                      | 13<br>(31.7) | 1<br>(2.4) | 107<br>(66.9)                       | 49<br>(30.6) | 4<br>(2.5) | Taqman                |

1  
2  
3 **(A) *CYP2E1* *RsaI/PstI* polymorphism**  
4  
5

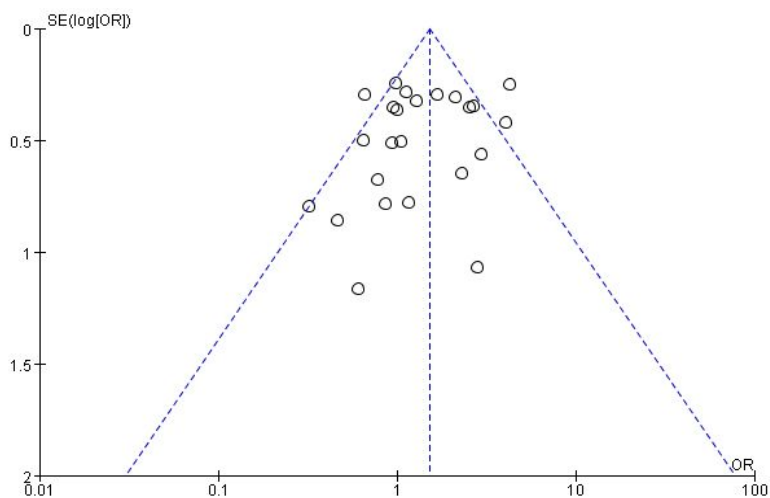

22 **(B) *CYP2E1* *DraI* polymorphism**  
23  
24

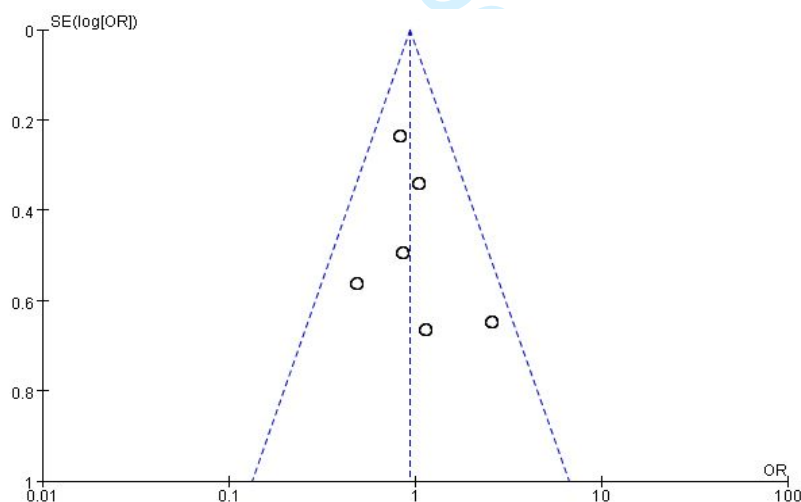

43 **(C) *NAT2* polymorphism**  
44  
45  
46  
47  
48  
49  
50  
51  
52  
53  
54  
55  
56  
57  
58  
59  
60

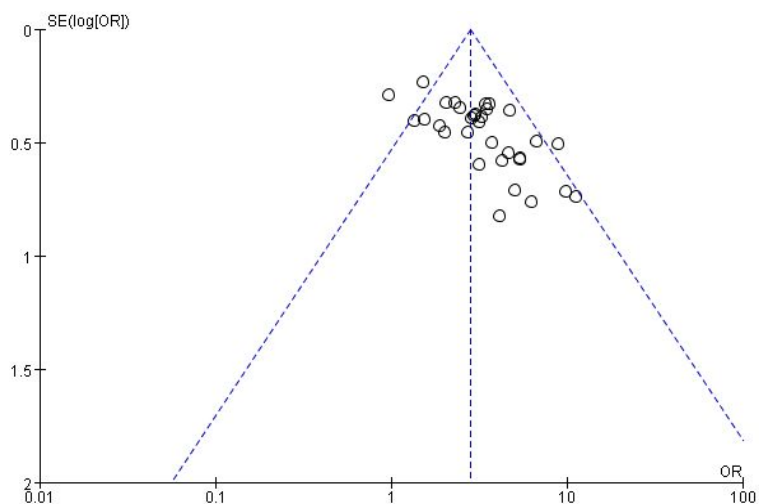



1  
2  
3  
4  
5  
6  
7  
8  
9  
10  
11  
12  
13  
14  
15  
16  
17  
18  
19  
20  
21  
22  
23  
24  
25  
26  
27  
28  
29  
30  
31  
32  
33  
34  
35  
36  
37  
38  
39  
40  
41  
42  
43  
44  
45  
46  
47  
48  
49  
50  
51  
52  
53  
54  
55  
56  
57  
58  
59  
60

**(D) *GSTM1* polymorphism**

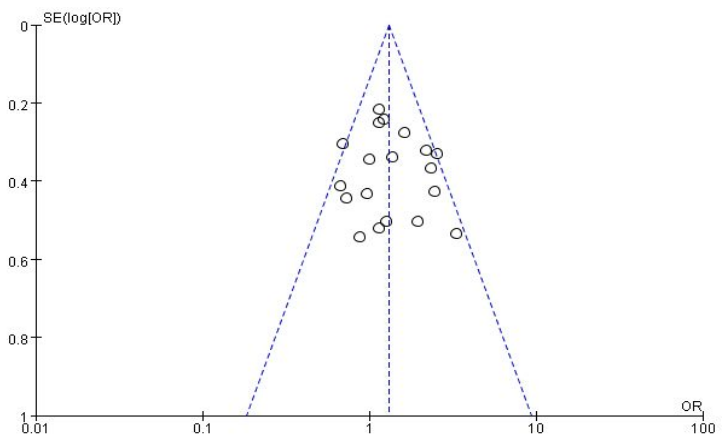

**(E) *GSTT1* polymorphism**

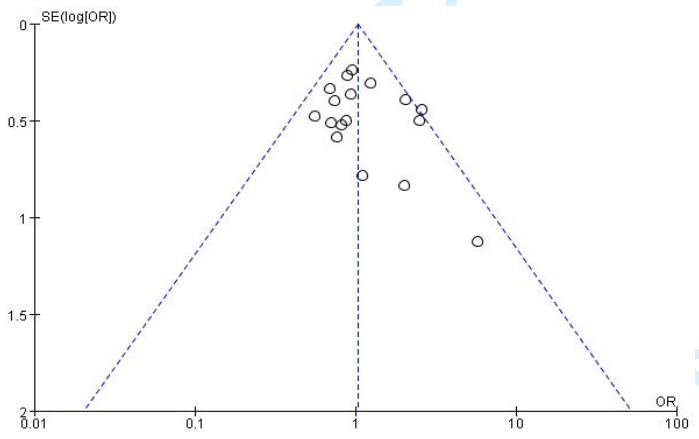

**(F) *GSTT1/M1* polymorphism**

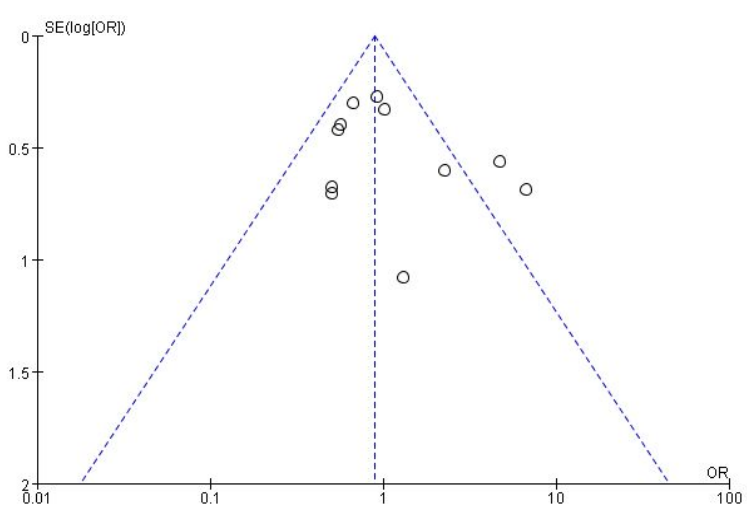

1  
2  
3 **(G) *SLCO1B1* 388A>G and 521T>C polymorphism**  
4  
5

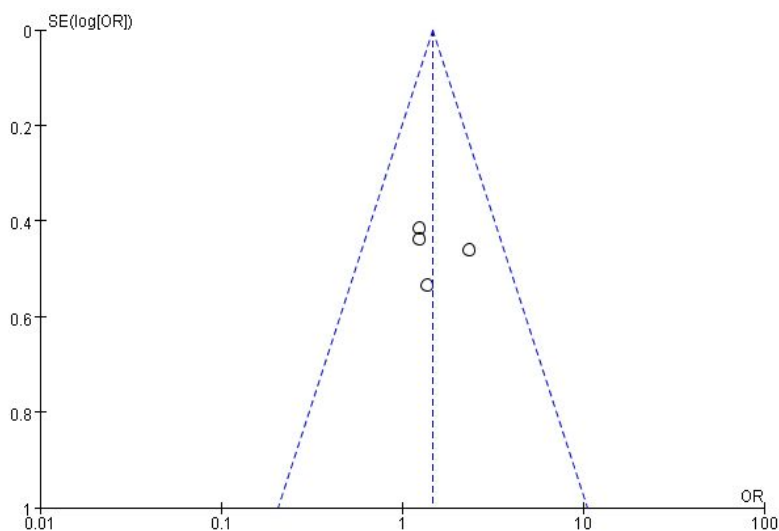

**S8 Figure.** Funnel plots to evaluate publication bias for the *CYP2E1*, *NAT2*, *GST*, and *SLCO1B1* polymorphisms associated with the risk of anti-tuberculosis drug-induced liver injury. (A) *CYP2E1* *RsaI/PstI* polymorphism, (B) *CYP2E1* *DraI* polymorphism, (C) *NAT2* polymorphism, (D) *GSTM1* polymorphism, (E) *GSTT1* polymorphism, (F) *GSTT1/MI* polymorphism, and (G) *SLCO1B1* 388A>G and 521T>C polymorphism.

**S9 Table. Subgroup analysis for the association between CYP2E1 polymorphisms and the risk of anti-tuberculosis drug-induced liver injury based on ethnicity, anti-tuberculosis drug regimen, and study design**

| Polymorphic gene                                     | Subgroup                                              | Number of studies | Case/control (n) | Test of association |                      | Model of meta-analysis | Test of heterogeneity |                      |        |
|------------------------------------------------------|-------------------------------------------------------|-------------------|------------------|---------------------|----------------------|------------------------|-----------------------|----------------------|--------|
|                                                      |                                                       |                   |                  | OR [95% CI]         | P value <sup>a</sup> |                        | I <sup>2</sup> , %    | P value <sup>b</sup> |        |
| <i>CYP2E1 RsaI/PstI</i><br>(c1/c1 vs. c1/c2 + c2/c2) | Total                                                 | 24                | 1293/5450        | 1.39 [1.06, 1.83]   | 0.02                 | Random                 | 60                    | <0.0001              |        |
|                                                      | Ethnicity                                             | East Asian        | 10               | 736/3076            | 1.62 [1.12, 2.36]    | 0.01                   | Random                | 69                   | 0.0006 |
|                                                      |                                                       | Indian            | 6                | 310/1295            | 1.08 [0.52, 2.25]    | 0.85                   | Random                | 70                   | 0.005  |
|                                                      |                                                       | South American    | 6                | 216/869             | 1.30 [0.83, 2.03]    | 0.25                   | Fixed                 | 0                    | 0.49   |
|                                                      |                                                       | Others            | 2                | 31/210              | 0.98 [0.39, 2.45]    | 0.96                   | Fixed                 | 0                    | 0.66   |
|                                                      | Anti-TB drug regimen                                  | INH alone         | 2                | 31/210              | 0.98 [0.39, 2.45]    | 0.96                   | Fixed                 | 0                    | 0.66   |
|                                                      |                                                       | Combination       | 21               | 1212/5104           | 1.35 [1.01, 1.79]    | <0.00001               | Random                | 61                   | 0.0002 |
|                                                      | Study design                                          | Cohort            | 11               | 564/3120            | 1.32 [0.94, 1.87]    | 0.11                   | Random                | 50                   | 0.03   |
|                                                      |                                                       | Case-control      | 12               | 729/2330            | 1.42 [0.93, 2.16]    | 0.10                   | Random                | 65                   | 0.0006 |
|                                                      | <i>CYP2E1 DraI<sup>c</sup></i><br>(D/D vs. D/C + C/C) | Total             | 6                | 233/1272            | 0.93 [0.68, 1.27]    | 0.64                   | Fixed                 | 0                    | 0.51   |
| Ethnicity                                            |                                                       | East Asian        | 2                | 109/448             | 0.84 [0.55, 1.28]    | 0.41                   | Fixed                 | 0                    | 0.96   |
|                                                      |                                                       | Indian            | 2                | 91/342              | 0.83 [0.48, 1.45]    | 0.51                   | Fixed                 | 27                   | 0.24   |
|                                                      |                                                       | South American    | 2                | 33/482              | 1.80 [0.73, 4.45]    | 0.20                   | Fixed                 | 0                    | 0.37   |
| Study design                                         |                                                       | Cohort            | 2                | 56/407              | 0.68 [0.31, 1.50]    | 0.33                   | Fixed                 | 0                    | 0.33   |
|                                                      |                                                       | Case-control      | 4                | 177/865             | 0.99 [0.70, 1.38]    | 0.94                   | Fixed                 | 0                    | 0.42   |

Abbreviations: *CI*, confidence interval; *CYP2E1*, cytochrome P450 2E1; *INH*, isoniazid; *OR*, odds ratio; *TB*, tuberculosis

<sup>a</sup> P value from Z test

1  
2  
3   <sup>b</sup> P value from Cochran's Q test based on chi-square statistic

4   <sup>c</sup> Subgroup analysis based on anti-TB drug regimen could not be performed due to insufficient information provided.  
5  
6  
7  
8  
9  
10  
11  
12  
13  
14  
15  
16  
17  
18  
19  
20  
21  
22  
23  
24  
25  
26  
27  
28  
29  
30  
31  
32  
33  
34  
35  
36  
37  
38  
39  
40  
41  
42  
43  
44  
45  
46

For peer review only

**S10 Table. Subgroup analysis for the association between *NAT2* polymorphism and the risk of anti-tuberculosis drug-induced liver injury based on ethnicity, anti-tuberculosis drug regimen, and study design**

| Polymorphic gene                                                      | Subgroup             | Number of studies | Case/control (n) | Test of association |                      | Model of meta-analysis | Test of heterogeneity |                      |          |
|-----------------------------------------------------------------------|----------------------|-------------------|------------------|---------------------|----------------------|------------------------|-----------------------|----------------------|----------|
|                                                                       |                      |                   |                  | OR [95% CI]         | P value <sup>a</sup> |                        | I <sup>2</sup> , %    | P value <sup>b</sup> |          |
| <i>NAT2</i><br>(Slow acetylator vs. fast and intermediate acetylator) | Total                | 35                | 1323/7319        | 3.30 [2.65, 4.11]   | <0.00001             | Random                 | 47                    | 0.002                |          |
|                                                                       | Ethnicity            | East Asian        | 13               | 590/3970            | 4.00 [2.42, 6.60]    | <0.00001               | Random                | 77                   | <0.00001 |
|                                                                       |                      | Indian            | 6                | 246/1352            | 3.07 [2.26, 4.16]    | <0.00001               | Fixed                 | 0                    | 0.74     |
|                                                                       |                      | West Asian        | 2                | 44/106              | 9.51 [4.19, 21.61]   | <0.00001               | Fixed                 | 0                    | 0.79     |
|                                                                       |                      | South American    | 7                | 231/1110            | 2.94 [2.11, 4.08]    | <0.00001               | Fixed                 | 0                    | 0.75     |
|                                                                       |                      | African           | 2                | 55/212              | 2.08 [1.06, 4.10]    | 0.03                   | Fixed                 | 52                   | 0.15     |
|                                                                       |                      | Others            | 5                | 157/569             | 2.56 [1.72, 3.79]    | <0.00001               | Fixed                 | 15                   | 0.32     |
|                                                                       | Anti-TB drug regimen | INH alone         | 2                | 31/210              | 2.32 [1.05, 5.13]    | 0.04                   | Fixed                 | 0                    | 0.45     |
|                                                                       |                      | Combination       | 32               | 1256/6954           | 3.37 [2.67, 4.25]    | <0.00001               | Random                | 56                   | <0.0001  |
|                                                                       |                      | Cohort            | 18               | 673/4850            | 2.82 [2.35, 3.40]    | <0.00001               | Fixed                 | 40                   | 0.04     |
| Study design                                                          | Case-control         | 17                | 650/2469         | 3.53 [2.42, 5.16]   | <0.00001             | Random                 | 65                    | 0.0001               |          |

Abbreviations: *CI*, confidence interval; *INH*, isoniazid; *NAT2*, N-acetyltransferase 2; *OR*, odds ratio; *TB*, tuberculosis

<sup>a</sup> P value from Z test

<sup>b</sup> P value from Cochran's Q test based on chi-square statistic

**S11 Table. Subgroup analysis for the association between *GST* polymorphisms and the risk of anti-tuberculosis drug-induced liver injury based on ethnicity, anti-tuberculosis drug regimen, and study design**

| Polymorphic gene                                                 | Subgroup     | Number of studies | Case/control (n) | Test of association |                      | Model of meta-analysis | Test of heterogeneity |                      |        |
|------------------------------------------------------------------|--------------|-------------------|------------------|---------------------|----------------------|------------------------|-----------------------|----------------------|--------|
|                                                                  |              |                   |                  | OR [95% CI]         | P value <sup>a</sup> |                        | I <sup>2</sup> , %    | P value <sup>b</sup> |        |
| <i>GSTM1</i> <sup>c</sup><br>(null vs. non-null)                 | Total        | 19                | 977/5119         | 1.30 [1.12, 1.52]   | 0.0007               | Fixed                  | 33                    | 0.08                 |        |
|                                                                  | Ethnicity    | East Asian        | 7                | 442/3110            | 1.23 [0.99, 1.54]    | 0.06                   | Fixed                 | 23                   | 0.25   |
|                                                                  |              | Indian            | 7                | 341/1420            | 1.68 [1.30, 2.19]    | <0.0001                | Fixed                 | 36                   | 0.15   |
|                                                                  |              | Brazilian         | 4                | 159/529             | 0.98 [0.66, 1.47]    | 0.94                   | Fixed                 | 0                    | 0.60   |
|                                                                  | Study design | Cohort            | 8                | 462/3439            | 1.41 [1.04, 1.93]    | 0.03                   | Random                | 44                   | 0.08   |
| Case-control                                                     |              | 11                | 515/1680         | 1.25 [1.01, 1.55]   | 0.20                 | Fixed                  | 29                    | 0.17                 |        |
| <i>GSTT1</i> <sup>c</sup><br>(null vs. non-null)                 | Total        | 17                | 768/4823         | 1.03 [0.85, 1.25]   | 0.76                 | Fixed                  | 16                    | 0.26                 |        |
|                                                                  | Ethnicity    | East Asian        | 6                | 338/2999            | 0.96 [0.74, 1.24]    | 0.75                   | Fixed                 | 0                    | 0.94   |
|                                                                  |              | Indian            | 6                | 236/1235            | 1.37 [0.72, 2.59]    | 0.33                   | Random                | 57                   | 0.04   |
|                                                                  |              | Brazilian         | 4                | 159/529             | 0.80 [0.47, 1.33]    | 0.39                   | Fixed                 | 0                    | 0.97   |
|                                                                  | Study design | Cohort            | 8                | 408/3354            | 0.89 [0.67, 1.19]    | 0.44                   | Fixed                 | 3                    | 0.41   |
| Case-control                                                     |              | 9                 | 360/1469         | 1.16 [0.90, 1.50]   | 0.26                 | Fixed                  | 24                    | 0.23                 |        |
| <i>GSTM1/GSTT1</i> <sup>c</sup><br>(dual-null vs. one-/non-null) | Total        | 11                | 547/4233         | 1.05 [0.67, 1.62]   | 0.84                 | Random                 | 59                    | 0.006                |        |
|                                                                  | Ethnicity    | East Asian        | 3                | 235/2701            | 0.83 [0.58, 1.20]    | 0.33                   | Fixed                 | 0                    | 0.49   |
|                                                                  |              | Indian            | 5                | 203/1202            | 1.33 [0.50, 3.53]    | 0.56                   | Random                | 80                   | 0.0005 |
|                                                                  |              | Brazilian         | 2                | 74/270              | 0.67 [0.20, 2.18]    | 0.50                   | Fixed                 | 0                    | 0.47   |
|                                                                  | Study design | Cohort            | 6                | 298/3136            | 0.85 [0.45, 1.61]    | 0.62                   | Random                | 58                   | 0.04   |
| Case-control                                                     |              | 5                 | 249/1097         | 1.31 [0.71, 2.43]   | 0.39                 | Random                 | 59                    | 0.04                 |        |

Abbreviations: *CI*, confidence interval; *GSTM1*, glutathione S-transferase Mu 1; *GSTT1*, glutathione S-transferase Theta 1; *OR*, odds ratio

<sup>a</sup> P value from Z test

1  
2  
3  
4  
5  
6  
7  
8  
9  
10  
11  
12  
13  
14  
15  
16  
17  
18  
19  
20  
21  
22  
23  
24  
25  
26  
27  
28  
29  
30  
31  
32  
33  
34  
35  
36  
37  
38  
39  
40  
41  
42  
43  
44  
45  
46

<sup>b</sup> P value from Cochran's Q test based on chi-square statistic

<sup>c</sup> Subgroup analysis based on anti-tuberculosis drug regimen could not be performed due to insufficient information provided

For peer review only

## References

1. Feng FM, Guo M, Chen Y, *et al.* Genetic polymorphisms in metabolic enzymes and susceptibility to anti-tuberculosis drug-induced hepatic injury. *Genetics and Molecular Research* 2014;13:9463-71.
2. Kim SH, Kim SH, Bahn JW, *et al.* Genetic polymorphisms of drug-metabolizing enzymes and anti-TB drug-induced hepatitis. *Pharmacogenomics* 2009;10:1767-79.
3. Singh M, Gupta VH, Amarapurkar DN, *et al.* Association of genetic variants with anti-tuberculosis drug induced hepatotoxicity: A high resolution melting analysis. *Infection Genetics and Evolution* 2014;23:42-8.
4. Tang S, Lv X, Zhang Y, *et al.* Cytochrome P450 2E1 Gene Polymorphisms/Haplotypes and Anti-Tuberculosis Drug-Induced Hepatitis in a Chinese Cohort. *PLoS ONE* 2013;8:e57526.
5. Ben Mahmoud L, Ghazzi H, Kamoun A, *et al.* Polymorphism of the N-acetyltransferase 2 gene as a susceptibility risk factor for antituberculosis drug-induced hepatotoxicity in Tunisian patients with tuberculosis. *Pathologie Biologie* 2012;60:324-30.
6. Bozok Cetintas V, Erer OF, Kosova B, *et al.* Determining the relation between N-acetyltransferase-2 acetylator phenotype and antituberculosis drug induced hepatitis by molecular biologic tests. *Tuberk Toraks* 2008;56:81-6.
7. Higuchi N, Tahara N, Yanagihara K, *et al.* NAT2 6A, a haplotype of the N-acetyltransferase 2 gene, is an important biomarker for risk of anti-tuberculosis drug-induced hepatotoxicity in Japanese patients with tuberculosis. *World J Gastroenterol* 2007;13:6003-8.
8. Ho HT, Wang TH, Hsiong CH, *et al.* The NAT2 tag SNP rs1495741 correlates with the susceptibility of antituberculosis drug-induced hepatotoxicity. *Pharmacogenet Genomics* 2013;23:200-7.
9. Huang YS, Chern HD, Su WJ, *et al.* Polymorphism of the N-acetyltransferase 2 gene as a susceptibility risk factor for antituberculosis drug-induced hepatitis. *Hepatology* 2002;35:883-9.
10. Khalili H, Fouladdel S, Sistanizad M, *et al.* Association of N-acetyltransferase-2 genotypes and anti-tuberculosis induced liver injury: First case-controlled study from Iran. *Current Drug Safety* 2011;6:17-22.
11. Leiro-Fernandez V, Valverde D, Vazquez-Gallardo R, *et al.* N-acetyltransferase 2 polymorphisms and risk of anti-tuberculosis drug-induced hepatotoxicity in Caucasians. *International Journal of Tuberculosis and Lung Disease* 2011;15:1403-8.
12. Lv X, Tang S, Xia Y, *et al.* NAT2 genetic polymorphisms and anti-tuberculosis drug-induced hepatotoxicity in Chinese community population. *Ann Hepatol* 2012;11:700-7.
13. Ng CS, Hasnat A, Al Maruf A, *et al.* N-acetyltransferase 2 (NAT2) genotype as a risk factor for development of drug-induced liver injury relating to antituberculosis drug treatment in a mixed-ethnicity patient group. *European Journal of Clinical Pharmacology* 2014;70:1079-86.
14. Ohno M, Yamaguchi I, Yamamoto I, *et al.* Slow N-acetyltransferase 2 genotype affects the incidence of isoniazid and rifampicin-induced hepatotoxicity. *International Journal of Tuberculosis and Lung Disease* 2000;4:256-61.



- 1
- 2
- 3 15. Possuelo LG, Castelan JA, de Brito TC, *et al.* Association of slow N-acetyltransferase 2 profile and
- 4 anti-TB drug-induced hepatotoxicity in patients from Southern Brazil. *European Journal of Clinical*
- 5 *Pharmacology* 2008;64:673-81.
- 6
- 7 16. Rana SV, Ola RP, Sharma SK, *et al.* Comparison between acetylator phenotype and genotype
- 8 polymorphism of n-acetyltransferase-2 in tuberculosis patients. *Hepatology International* 2012;6:397-
- 9 402.
- 10
- 11 17. Shimizu Y, Dobashi K, Mita Y, *et al.* DNA microarray genotyping of N-acetyltransferase 2
- 12 polymorphism using carbodiimide as the linker for assessment of isoniazid hepatotoxicity.
- 13 *Tuberculosis* 2006;86:374-81.
- 14
- 15 18. Yuliwulandari R, Susilowati RW, Wicaksono BD, *et al.* NAT2 variants are associated with drug-
- 16 induced liver injury caused by anti-tuberculosis drugs in Indonesian patients with tuberculosis. *J Hum*
- 17 *Genet* 2016; doi:10.1038/jhg.2016.10.
- 18
- 19 19. Wattanapokayakit S, Mushiroda T, Yanai H, *et al.* NAT2 slow acetylator associated with anti-
- 20 tuberculosis drug-induced liver injury in Thai patients. *Int J Tuberc Lung Dis* 2016;20:1364-9.
- 21
- 22 20. Chatterjee S, Lyle N, Mandal A, *et al.* GSTT1 and GSTM1 gene deletions are not associated with
- 23 hepatotoxicity caused by antitubercular drugs. *Journal of Clinical Pharmacy and Therapeutics*
- 24 2010;35:465-70.
- 25
- 26 21. Gupta VH, Singh M, Amarapurkar DN, *et al.* Association of GST null genotypes with anti-
- 27 tuberculosis drug induced hepatotoxicity in Western Indian population. *Annals of Hepatology*
- 28 2013;12:959-65.
- 29
- 30 22. Huang YS, Su WJ, Huang YH, *et al.* Genetic polymorphisms of manganese superoxide dismutase,
- 31 NAD(P)H : quinone oxidoreductase, glutathione S-transferase M1 and T1, and the susceptibility to
- 32 drug-induced liver injury. *Journal of Hepatology* 2007;47:128-34.
- 33
- 34 23. Kim SH, Kim SH, Yoon HJ, *et al.* GSTT1 and GSTM1 null mutations and adverse reactions induced
- 35 by antituberculosis drugs in Koreans. *Tuberculosis* 2010;90:39-43.
- 36
- 37 24. Leiro V, Fernandez-Villar A, Valverde D, *et al.* Influence of glutathione S-transferase M1 and T1
- 38 homozygous null mutations on the risk of antituberculosis drug-induced hepatotoxicity in a Caucasian
- 39 population. *Liver International* 2008;28:835-9.
- 40
- 41 25. Liu F, Jiao AX, Wu XR, *et al.* Impact of Glutathione S-Transferase M1 and T1 on Anti-Tuberculosis
- 42 Drug-Induced Hepatotoxicity in Chinese Pediatric Patients. *Plos One* 2014;9.
- 43
- 44 26. Monteiro TP, El-Jaick KB, Jeovanio-Silva AL, *et al.* The roles of GSTM1 and GSTT1 null genotypes
- 45 and other predictors in anti-tuberculosis drug-induced liver injury. *Journal of Clinical Pharmacy and*
- 46 *Therapeutics* 2012;37:712-8.
- 47
- 48 27. Rana SV, Kamboj JK, Sharma SK, *et al.* Antioxidant status and GST gene polymorphisms in
- 49 antitubercular treatment-induced hepatotoxicity patients. *Hepatol Int* 2013;7:876-82.
- 50
- 51 28. Roy B, Chowdhury A, Kundu S, *et al.* Increased risk of antituberculosis drug-induced hepatotoxicity
- 52 in individuals with glutathione S-transferase M1 'null' mutation. *Journal of Gastroenterology and*
- 53 *Hepatology* 2001;16:1033-7.
- 54
- 55 29. Chen R, Wang J, Tang S, *et al.* Association of polymorphisms in drug transporter genes (SLCO1B1
- 56 and SLC10A1) and anti-tuberculosis drug-induced hepatotoxicity in a Chinese cohort. *Tuberculosis*
- 57
- 58
- 59
- 60

- 2015;95:68-74.
30. Kim SH, Kim SH, Lee JH, *et al.* Polymorphisms in drug transporter genes (ABCB1, SLCO1B1 and ABCC2) and hepatitis induced by antituberculosis drugs. *Tuberculosis* 2012;92:100-4.
  31. Li LM, Chen L, Deng GH, *et al.* SLCO1B1\*15 haplotype is associated with rifampin-induced liver injury. *Molecular Medicine Reports* 2012;6:75-82.
  32. An HR, Wu XQ, Wang ZY, *et al.* NAT2 and CYP2E1 polymorphisms associated with antituberculosis drug-induced hepatotoxicity in Chinese patients. *Clinical and Experimental Pharmacology and Physiology* 2012;39:535-43.
  33. Bose PD, Sarma MP, Medhi S, *et al.* Role of polymorphic N-acetyl transferase2 and cytochrome P4502E1 gene in antituberculosis treatment-induced hepatitis. *Journal of Gastroenterology and Hepatology* 2011;26:312-8.
  34. Chamorro JG, Castagnino JP, Musella RM, *et al.* Sex, ethnicity, and slow acetylator profile are the major causes of hepatotoxicity induced by antituberculosis drugs. *Journal of Gastroenterology and Hepatology* 2013;28:323-8.
  35. Cho HJ, Koh WJ, Ryu YJ, *et al.* Genetic polymorphisms of NAT2 and CYP2E1 associated with antituberculosis drug-induced hepatotoxicity in Korean patients with pulmonary tuberculosis. *Tuberculosis* 2007;87:551-6.
  36. Gupta VH, Amarapurkar DN, Singh M, *et al.* Association of N-acetyltransferase 2 and cytochrome P450 2E1 gene polymorphisms with antituberculosis drug-induced hepatotoxicity in Western India. *Journal of Gastroenterology and Hepatology* 2013;28:1368-74.
  37. Huang YS, Chern HD, Su WJ, *et al.* Cytochrome p450 2E1 genotype and the susceptibility to antituberculosis drug-induced hepatitis. *Hepatology* 2003;37:924-30.
  38. Lee SW, Chung LS, Huang HH, *et al.* NAT2 and CYP2E1 polymorphisms and susceptibility to first-line anti-tuberculosis drug-induced hepatitis. *Int J Tuberc Lung Dis* 2010;14:622-6.
  39. Mishra S, Daschakraborty S, Shukla P, *et al.* N-acetyltransferase and cytochrome P450 2E1 gene polymorphisms and susceptibility to antituberculosis drug hepatotoxicity in an Indian population. *National Medical Journal of India* 2013;26:260-5.
  40. Santos NP, Callegari-Jacques SM, Ribeiro Dos Santos AK, *et al.* N-acetyl transferase 2 and cytochrome P450 2E1 genes and isoniazid-induced hepatotoxicity in Brazilian patients. *Int J Tuberc Lung Dis* 2013;17:499-504.
  41. Vuilleumier N, Rossier MF, Chiappe A, *et al.* CYP2E1 genotype and isoniazid-induced hepatotoxicity in patients treated for latent tuberculosis. *Eur J Clin Pharmacol* 2006;62:423-9.
  42. Yamada S, Tang M, Richardson K, *et al.* Genetic variations of NAT2 and CYP2E1 and isoniazid hepatotoxicity in a diverse population. *Pharmacogenomics* 2009;10:1433-45.
  43. Zaverucha-do-Valle C, Monteiro SP, El-Jaick KB, *et al.* The role of cigarette smoking and liver enzymes polymorphisms in anti-tuberculosis drug-induced hepatotoxicity in Brazilian patients. *Tuberculosis (Edinb)* 2014;94:299-305.
  44. Sharma SK, Jha BK, Sharma A, *et al.* Genetic polymorphisms of CYP2E1 and GSTM1 loci and susceptibility to anti-tuberculosis drug-induced hepatotoxicity. *International Journal of Tuberculosis and Lung Disease* 2014;18:588-93.

- 1  
2  
3 45. Wang T, Yu HT, Wang W, *et al.* Genetic Polymorphisms of Cytochrome P450 and Glutathione S-  
4 transferase Associated with Antituberculosis Drug-induced Hepatotoxicity in Chinese Tuberculosis  
5 Patients. *Journal of International Medical Research* 2010;38:977-86.  
6  
7 46. Tang SW, Lv XZ, Zhang Y, *et al.* CYP2E1, GSTM1 and GSTT1 genetic polymorphisms and  
8 susceptibility to antituberculosis drug-induced hepatotoxicity: a nested case-control study. *Journal of*  
9 *Clinical Pharmacy and Therapeutics* 2012;37:588-93.  
10  
11 47. Yimer G, Ueda N, Habtewold A, *et al.* Pharmacogenetic & pharmacokinetic biomarker for efavirenz  
12 based ARV and rifampicin based anti-TB drug induced liver injury in TB-HIV infected patients. *PLoS*  
13 *One* 2011;6:e27810.  
14  
15 48. Brito TC, Possuelo LG, Valim ARM, *et al.* Polymorphisms in CYP2E1, GSTM1 and GSTT1 and  
16 anti-tuberculosis drug-induced hepatotoxicity. *Anais Da Academia Brasileira De Ciencias*  
17 2014;86:855-65.  
18  
19 49. Forestiero FJ, Cecon L, Hirata MH, *et al.* Relationship of NAT2, CYP2E1 and GSTM1/GSTT1  
20 polymorphisms with mild elevation of liver enzymes in Brazilian individuals under anti-tuberculosis  
21 drug therapy. *Clinica Chimica Acta* 2013;415:215-9.  
22  
23 50. Rana SV, Sharma SK, Ola RP, *et al.* N-acetyltransferase 2, cytochrome P450E1 and glutathione S-  
24 transferase genotypes in antitubercular treatment-induced hepatotoxicity in North Indians. *J Clin*  
25 *Pharm Ther* 2014;39:91-6.  
26  
27 51. Singla N, Gupta D, Birbian N, *et al.* Association of NAT2, GST and CYP2E1 polymorphisms and  
28 anti-tuberculosis drug-induced hepatotoxicity. *Tuberculosis* 2014;94:293-8.  
29  
30 52. Sotsuka T, Sasaki Y, Hirai S, *et al.* Association of Isoniazid-metabolizing Enzyme Genotypes and  
31 Isoniazid-induced Hepatotoxicity in Tuberculosis Patients. *In Vivo* 2011;25:803-12.  
32  
33 53. Teixeira RL, Morato RG, Cabello PH, *et al.* Genetic polymorphisms of NAT2, CYP2E1 and GST  
34 enzymes and the occurrence of antituberculosis drug-induced hepatitis in Brazilian TB patients. *Mem*  
35 *Inst Oswaldo Cruz* 2011;106:716-24.  
36  
37 54. Xiang Y, Ma L, Wu WD, *et al.* The Incidence of Liver Injury in Uyghur Patients Treated for TB in  
38 Xinjiang Uyghur Autonomous Region, China, and Its Association with Hepatic Enzyme  
39 Polymorphisms NAT2, CYP2E1, GSTM1 and GSTT1. *Plos One* 2014;9.  
40  
41  
42  
43  
44  
45  
46  
47  
48  
49  
50  
51  
52  
53  
54  
55  
56  
57  
58  
59  
60

# BMJ Open

## Association of genetic polymorphisms of CYP2E1, NAT2, GST, and SLCO1B1 with the risk of anti-tuberculosis drug-induced liver injury: a systematic review and meta-analysis

|                                 |                                                                                                                                                                                                                                                                                                                                                                                                                                                                                                                                                                                   |
|---------------------------------|-----------------------------------------------------------------------------------------------------------------------------------------------------------------------------------------------------------------------------------------------------------------------------------------------------------------------------------------------------------------------------------------------------------------------------------------------------------------------------------------------------------------------------------------------------------------------------------|
| Journal:                        | <i>BMJ Open</i>                                                                                                                                                                                                                                                                                                                                                                                                                                                                                                                                                                   |
| Manuscript ID                   | bmjopen-2018-027940.R2                                                                                                                                                                                                                                                                                                                                                                                                                                                                                                                                                            |
| Article Type:                   | Research                                                                                                                                                                                                                                                                                                                                                                                                                                                                                                                                                                          |
| Date Submitted by the Author:   | 11-Jun-2019                                                                                                                                                                                                                                                                                                                                                                                                                                                                                                                                                                       |
| Complete List of Authors:       | Yang , Seungwon ; Yonsei University, Department of Pharmacy and Yonsei Institute of Pharmaceutical Science<br>Hwang, Se Jung ; Kyung Hee University, Department of Pharmacy<br>Park, Jung Yun ; Seoul National University, Department of Pharmacy<br>Chung, Eun Kyoung; Kyung Hee University, College of Pharmacy, Department of Pharmacy; Kyung Hee University Hospital at Gangdong, Department of Pharmacy<br>Lee , Jangik I.; Seoul National University, College of Pharmacy; Seoul National University, College of Pharmacy and Research Institute of Pharmaceutical Sciences |
| <b>Primary Subject Heading</b>: | Respiratory medicine                                                                                                                                                                                                                                                                                                                                                                                                                                                                                                                                                              |
| Secondary Subject Heading:      | Genetics and genomics, Infectious diseases, Evidence based practice                                                                                                                                                                                                                                                                                                                                                                                                                                                                                                               |
| Keywords:                       | Anti-tuberculosis drug-induced liver injury, genetic polymorphisms, meta-analysis, drug-metabolizing enzyme, drug transporter, Tuberculosis < INFECTIOUS DISEASES                                                                                                                                                                                                                                                                                                                                                                                                                 |
|                                 |                                                                                                                                                                                                                                                                                                                                                                                                                                                                                                                                                                                   |

SCHOLARONE™  
Manuscripts

1  
2  
3  
4 Original article  
5  
6  
7

8 **Association of genetic polymorphisms of *CYP2E1*, *NAT2*, *GST*, and**  
9 ***SLCO1B1* with the risk of anti-tuberculosis drug-induced liver**  
10 **injury: a systematic review and meta-analysis**  
11  
12  
13  
14  
15  
16  
17

18 Seungwon Yang<sup>1</sup>, Se Jung Hwang<sup>2</sup>, Jung Yun Park<sup>3</sup>, Eun Kyoung Chung<sup>2,4\*</sup>, Jangik Ike Lee<sup>3,5\*</sup>  
19

20 <sup>1</sup> Department of Pharmacy and Yonsei Institute of Pharmaceutical Science, College of Pharmacy,  
21 Yonsei University, Incheon 21983, Republic of Korea  
22  
23

24 <sup>2</sup> Department of Pharmacy, College of Pharmacy, Kyung Hee University, Seoul 02447, Republic  
25 of Korea  
26  
27  
28

29 <sup>3</sup> College of Pharmacy, Seoul National University, Seoul 08826, Republic of Korea  
30

31 <sup>4</sup> Department of Pharmacy, Kyung Hee University Hospital at Gangdong, Seoul, 05278,  
32 Republic of Korea  
33  
34  
35

36 <sup>5</sup> College of Pharmacy and Research Institute of Pharmaceutical Sciences, Seoul National  
37 University, Seoul 08826, Republic of Korea  
38  
39  
40  
41  
42  
43  
44

45 **Word counts:** 4453 words  
46  
47  
48  
49  
50

51 **\*Corresponding authors**  
52  
53

54 Prof., Eun Kyoung Chung, Pharm.D., Ph.D.  
55  
56

1  
2  
3  
4 Department of Pharmacy, College of Pharmacy, Kyung Hee University  
5

6 26 Kyungheedaero, Dongdaemun-gu, Seoul 02447  
7

8 South Korea  
9

10  
11 Tel: +82-2-962-2122  
12

13 Fax: +82-2-961-9580  
14

15  
16 E-mail: cekchung@khu.ac.kr  
17  
18

19  
20 Prof. Jangik I. Lee, Pharm.D., Ph.D.  
21

22 Department of Pharmacy, College of Pharmacy, Seoul National University  
23

24 103 Daehak-Ro, Jongno-Gu, Seoul 03080  
25

26  
27 South Korea  
28

29 Tel: +82-2-3668-7474  
30

31 Fax: +82-2-3668-7475  
32

33  
34 E-mail: jangik.lee@snu.ac.kr  
35

36 \*Jangik I. Lee and Eun Kyoung Chung have equally contributed to this study.  
37  
38  
39  
40

## 41 **Running head**

42  
43

44 Genetics of anti-tuberculosis liver injury  
45  
46  
47  
48  
49  
50  
51  
52  
53  
54  
55  
56  
57  
58  
59  
60

## ABSTRACT

**Objectives** The objective of this study was to investigate the association between genetic polymorphisms of *NAT2*, *CYP2E1*, *GST*, and *SLCO1B1* and the risk of anti-tuberculosis drug-induced liver injury (ATDILI).

**Design** Systematic review and meta-analysis

**Data Sources** PubMed, EMBASE, Web of Science, and Cochrane Reviews databases were searched through April 2019.

**Eligibility Criteria** We included case-control or cohort studies investigating an association between *NAT2*, *CYP2E1*, *GST*, or *SLCO1B1* polymorphisms and the ATDILI risk in patients with tuberculosis.

**Data extraction and synthesis** Three authors screened articles, extracted data, and assessed study quality. The strength of association was evaluated for each gene using the pooled odds ratio (OR) with a 95% confidence interval (CI) based on the fixed- or random-effects model. Sensitivity analysis was performed to confirm the reliability and robustness of the results.

**Results** Fifty-four studies were included in this analysis (n = 26 for *CYP2E1*, n = 35 for *NAT2*, n = 19 for *GST*, n = 4 for *SLCO1B1*). The risk of ATDILI was significantly increased with the following genotypes: *CYP2E1 RsaI/PstI* c1/c1 (OR = 1.39; 95% CI 1.06–1.83), *NAT2* slow acetylator (OR = 3.30, 95% CI 2.65–4.11), and *GSTM1* null (OR = 1.30, 95% CI 1.12–1.52). No significant association with ATDILI was found for the genetic polymorphisms of *CYP2E1 DraI*, *GSTT1*, *GSTM1/GSTT1*, *SLCO1B1* 388A>G, and *SLCO1B1* 521T>C (P > 0.05).

### Conclusions

ATDILI is more likely to occur in patients with *NAT2* slow acetylator genotype, *CYP2E1*

1  
2  
3  
4 *RsaI/PstI* c1/c1 genotype, and *GSTM1* null genotype. Close monitoring may be warranted for  
5  
6 patients with these genotypes.  
7  
8  
9  
10

### 11 **Strengths and limitations of this study**

12  
13

- 14 ● This is the first meta-analysis to evaluate the association between the risk of ATDILI  
15 and *SLCO1B1* in patients with tuberculosis.  
16  
17
- 18 ● We included most updated studies with the large sample sizes to better clarify the  
19 association of genetic polymorphisms with the risk of ATDILI.  
20  
21
- 22 ● The effect of anti-tuberculosis drug dosages on the risk of ATDILI could not be  
23 accounted for in this study due to the lack of drug dosing information in the majority of  
24 the included studies.  
25  
26  
27  
28  
29  
30  
31  
32  
33  
34  
35  
36  
37  
38  
39  
40  
41  
42  
43  
44  
45  
46  
47  
48  
49  
50  
51  
52  
53  
54  
55  
56  
57  
58  
59  
60



## Introduction

Tuberculosis is a rampant infectious disease caused by *Mycobacterium tuberculosis*. It poses a major public health threat globally with approximately 1.3 million deaths and 10 million new cases in 2017<sup>1</sup>. The mainstay of first-line tuberculosis treatment is a 4-drug combination regimen of isoniazid (INH), rifampicin (RIF), pyrazinamide (PZA), and ethambutol (EMB) during the first 2 months, followed by INH and RIF for additional 4 months<sup>2,3</sup>. The currently recommended therapy for tuberculosis is highly effective, resulting in high cure rates if patients are adherent to therapy<sup>4</sup>. However, treatment adherence is often suboptimal in patients receiving the combination anti-tuberculosis therapy due to many adverse drug reactions, some of which are considered detrimental<sup>5</sup>. One of the common adverse drug reactions associated with anti-tuberculosis medications is anti-tuberculosis drug-induced liver injury (ATDILI) affecting 2–28% of patients with tuberculosis<sup>6</sup>. ATDILI could be potentially serious and fatal, resulting in the treatment interruption and ultimately, treatment failure<sup>7,8</sup>.

Recently, increasing evidence suggests an association between the risk of ATDILI and genetic polymorphisms of drug-metabolizing enzymes (DMEs) and drug transporters<sup>9,10</sup>. Altered enzyme activity due to polymorphic genotypes of various DMEs including cytochrome P450 2E1 (CYP2E1), N-acetyltransferase 2 (NAT2), and glutathione S-transferase (GST) can result in the accumulation of toxic substances in the liver, leading to the development of ATDILI<sup>11</sup>. However, conflicting results have been reported regarding the association between the risk of ATDILI and genetic polymorphisms of various DMEs in patients with tuberculosis<sup>9,12,13</sup>. In addition to DMEs, drug transporters have been emerging as a key determinant of the pharmacokinetics and pharmacodynamics of a drug<sup>14</sup>. Among various drug transporters, organic

1  
2  
3  
4 anion transporting polypeptide 1B1 (OATP1B1), encoded by *SLCO1B1*, is the major influx  
5  
6 transporter responsible for hepatic uptake of RIF<sup>15</sup>. Although several studies have previously  
7  
8 examined the association between *SLCO1B1* polymorphisms and the risk of ATDILI, conflicting  
9  
10 results have been reported regarding the effect of *SLCO1B1* polymorphisms on ATDILI risk.  
11  
12

13 Therefore, an updated meta-analysis has been warranted to confirm the association between the  
14  
15 ATDILI risk and genetic polymorphisms of DMEs. In our preliminary literature search, several  
16  
17 polymorphic genes, including many DMEs, transporters, and other genes such as those involved  
18  
19 in the immune system, were identified to have an association with the risk of ATDILI. Among  
20  
21 these, sufficient, published information was available to confirm the effect of *CYP2E1*, *NAT2*,  
22  
23 *GST*, and *SLCO1B1* genetic polymorphisms on the ATDILI risk through meta-analysis.  
24  
25  
26  
27

## 28 **Objectives**

29  
30  
31 The objective of this meta-analysis was to evaluate the association between the risk of ATDILI  
32  
33 and genetic polymorphisms of *CYP2E1*, *NAT2*, *GST*, and *SLCO1B1* in patients with tuberculosis.  
34  
35  
36  
37

## 38 **Methods**

39  
40  
41 This study was in compliance with the Meta-analysis Of Observational Studies in Epidemiology  
42  
43 (MOOSE) checklist for reporting the study design, search strategy, methods, results, and  
44  
45 conclusions (S1 Table). Three authors (SY, JP, and SH) independently conducted a literature  
46  
47 search, study selection, quality assessment, and data extraction. Any discrepancies were  
48  
49 adjudicated by corresponding authors (JIL and EKC).  
50  
51  
52

## 53 **Search strategy**

1  
2  
3  
4 Electronic databases of PubMed, EMBASE, Web of Science, and Cochrane Reviews were  
5  
6 systematically searched from their inception to April 2019 to identify relevant studies evaluating  
7  
8 the association of *NAT2*, *CYP2E1*, *GST*, and *SLCO1B1* polymorphisms with ATDILI risk. A  
9  
10 comprehensive literature search was conducted using a combination of the following keywords  
11  
12 and Medical Subject Heading (MeSH) terms: (“genetic polymorphism” or “*NAT2*” or “*CYP2E1*”  
13  
14 or “*GST*” or “*SLCO1B1*” or “drug-metabolizing enzymes” or “drug transporter”) AND (“anti-  
15  
16 tuberculosis agents drug-induced liver injuries” or “hepatotoxicity”). The detailed search  
17  
18 strategies for each electronic database used in this analysis are presented in S2 Table. The  
19  
20 reference lists in the selected reviews and meta-analyses were reviewed to ensure the inclusion of  
21  
22 all relevant evidence in this analysis.  
23  
24  
25  
26  
27

## 28 **Study selection**

29  
30  
31 Studies were considered eligible if they met all of the following inclusion criteria: (1) studies in  
32  
33 patients with tuberculosis receiving anti-tuberculosis drug regimen; (2) studies with the control  
34  
35 group of patients with tuberculosis, tolerant of anti-tuberculosis medications; (3) studies  
36  
37 evaluating the association between the occurrence of ATDILI and genetic polymorphisms of  
38  
39 *CYP2E1*, *NAT2*, *GST*, and *SLCO1B1* 388A>G and 521T>C; and (4) case-control or cohort  
40  
41 observational studies. Excluded studies were as follows: (1) studies available only in the form of  
42  
43 abstracts or meeting posters; (2) review or meta-analysis articles; (3) studies providing  
44  
45 insufficient data necessary for the statistical data analysis; (4) studies in non-English language;  
46  
47 (5) non-human studies including animal and *in vitro* studies; (6) studies with unpublished data;  
48  
49 (7) studies providing insufficient information on genotyping methods; and (8) healthy controls.  
50  
51  
52  
53  
54  
55  
56  
57  
58  
59  
60

## Quality assessment and data extraction

The quality of included studies was assessed using the revised Little's recommendation based on the following criteria<sup>16 17</sup>: (1) scientific design; (2) definite inclusion of study population; (3) explicit information on study population; (4) explicit diagnostic criteria of ATDILI; (5) genetic detection method; (6) appropriate statistical analysis; and (7) logical discussion of study bias.

Studies with an overall score of  $\geq 4$  (range 0 to 7) were considered high quality and retained in the analysis.

The following data were extracted from each study using a standardized extraction form:

(1) name of the first author; (2) year of publication; (3) the polymorphic gene(s) and genotype(s) under investigation; (4) ethnicity; (5) sample size; (6) mean or median age; (7) sex distribution; (8) anti-tuberculosis drug regimens; (9) diagnostic criteria of ATDILI; (10) genotyping methods; and (11) the number of cases and controls for each polymorphic genotype.

## Statistical analysis

The genotypes were analyzed based on the following proposed genetic risk model: (1) *NAT2* (slow acetylator vs. intermediate and fast acetylator); (2) *CYP2E1* (c1/c1 vs. c1/c2 and c2/c2 for the *RsaI/PstI* polymorphism, D/D vs. D/C and C/C for the *DraI* polymorphism); (3) *GSTM1* (null vs. non-null); (4) *GSTT1* (null vs. non-null); (5) *GSTM1/GSTT1* (dual-null vs. one- or non-null); and (6) *SLCO1B1* 388A>G and 521T>C polymorphisms. The genetic risk models for *NAT2*, *CYP2E1*, *GSTM1*, *GSTT1*, and *GSTM1/GSTT1* have been studied in previous studies<sup>9 18 19</sup>. Based on these previous studies, the most clinically significant and plausible model for each polymorphic gene was selected. Due to the relative paucity of data suggesting the most clinically

1  
2  
3  
4 relevant genetic model for *SLCO1B1* 388A>G and 521T>C polymorphisms, all three genomic  
5  
6 models including dominant, recessive, and additive models were evaluated. The Mantel-  
7  
8 Haenszel or DerSimonian-Laird method based on fixed- or random-effects models, respectively,  
9  
10 were used depending on the presence of heterogeneity<sup>20 21</sup>. The random-effects model was used  
11  
12 in the presence of significant heterogeneity; otherwise, the fixed-effects model was used to  
13  
14 estimate the total effect of a polymorphic gene genotype on the risk of ATDILI. Heterogeneity of  
15  
16 study outcomes among included studies was evaluated using Cochran's Q test (*Q*) and quantified  
17  
18 using Higgin's *I*<sup>2</sup> test. Significant heterogeneity was defined as the *I*<sup>2</sup> score of > 40%  
19  
20 accompanied by  $P < 0.10$  from the Cochran's Q test<sup>22</sup>. The strength of the association between  
21  
22 the genetic polymorphisms and the risk of ATDILI was estimated using pooled odds ratios (ORs)  
23  
24 with the corresponding 95% confidence intervals (CIs). The statistical significance of an OR was  
25  
26 defined as  $P < 0.05$  from the Z test.  
27  
28  
29  
30  
31

32 Subgroup analysis was performed based on ethnicity, anti-tuberculosis drug regimen  
33  
34 used, and the type of study design. Sensitivity analysis was conducted to assess the robustness of  
35  
36 the results and to identify the source of heterogeneity using the leave-one-out method. In each  
37  
38 analysis, one study was deleted, and with the one study left out, the meta-analysis was  
39  
40 performed; this process was repeated until every study had been deleted from our included study  
41  
42 pool for each tested polymorphic gene. Publication bias was evaluated with a symmetrical funnel  
43  
44 plot. Statistical analyses were performed using Review Manager Software version 5.3 (Cochrane  
45  
46 Collaboration, London, UK).  
47  
48  
49  
50  
51  
52

## 53 Patient and public involvement

54  
55  
56  
57  
58  
59  
60

1  
2  
3  
4 Patients and public were not involved in the design of this study.  
5  
6  
7

## 8 9 **Results**

### 10 11 12 **Study selection and characteristics**

13  
14  
15 Overall, 388 articles were identified through electronic database search and 3 articles through  
16 manual search by reviewing the reference lists of retrieved articles. After removing 99  
17 duplicates, 289 articles were screened for relevance based on the title and abstract. Among them,  
18 72 relevant articles were assessed for eligibility through full-text evaluations. Finally, a total of  
19 54 articles which met the inclusion criteria were included in our analysis (Figure 1). Among the  
20 54 studies, 26 studies were included for *CYP2E1*, 35 studies for *NAT2*, 19 studies for *GST* (19  
21 for *GSTM1*, 17 for *GSTT1*, and 11 for *GSTM1/GSTT1*), and 4 studies for *SLCO1B1* 388A>G and  
22 521T>C.  
23  
24  
25  
26  
27  
28  
29  
30  
31  
32

33  
34 Table 1 summarizes the characteristics of the included studies. Across the included  
35 studies, large variability in study population was observed in terms of ethnicity (Chinese,  
36 Japanese, Korean, Indian, Taiwanese, Brazilian, Caucasian, Iranian, Tunisian, and Turkish), age  
37 (mean or median age ranging from 27 to 70 years), and sex (the proportion of males ranging  
38 from 13% to 90%). Patients in our included studies received either monotherapy with INH or  
39 RIF or a combination therapy including a 4-drug regimen of INH, RIF, PZA, and EMB for the  
40 treatment of tuberculosis. ATDILI was defined as an elevated serum alanine aminotransferase  
41 (ALT) concentration by 1.5- to 5-fold or greater above the upper limit of normal (ULN)  
42 depending on the study. The quality score of the included studies was 6 or greater based on the  
43 revised Little's recommendation (Table 1, S3 Table)<sup>16,17</sup>. Genotype distribution and genotyping  
44  
45  
46  
47  
48  
49  
50  
51  
52  
53  
54  
55  
56

method used in the included studies are summarized for each polymorphic gene in S4 to S7 Tables. Funnel plots for *CYP2E1*, *NAT2*, *GST*, and *SLCO1B1* are provided in S8 Figure. None of the funnel plots showed an asymmetric inverted funnel shape, indicating the absence of potential publication bias.

## ***CYP2E1***

For the *CYP2E1 RsaI/PstI* polymorphism, 24 studies with 1293 cases and 5450 controls were included in our primary analysis. Using the random-effects model, the pooled estimates of all included studies ( $n = 24$ ) showed a significant association between the risk of ATDILI and the *CYP2E1 RsaI/PstI* polymorphism (OR for the c1/c1 genotype = 1.39, 95% CI 1.06–1.83,  $P = 0.02$ ;  $I^2 = 60\%$ ,  $P_{heterogeneity} < 0.0001$ ) (Figure 2A). In the subgroup analysis based on ethnicity, and anti-tuberculosis drug regimens, the risk of ATDILI was significantly increased for the *CYP2E1 RsaI/PstI* c1/c1 genotype in East Asian patients (OR = 1.62, 95% CI 1.26–2.36,  $P = 0.01$ ;  $I^2 = 69\%$ ,  $P_{heterogeneity} = 0.0006$ ) and in patients receiving a combination of anti-tuberculosis medications (OR = 1.35, 95% CI 1.01–1.79,  $P < 0.00001$ ;  $I^2 = 61\%$ ,  $P_{heterogeneity} = 0.0002$ ) (S9 Table). No significant association was observed between the risk of ATDILI and the *CYP2E1 RsaI/PstI* c1/c1 genotype when evaluating studies with the same study design only (i.e., either case-control studies or cohort studies) (S9 Table).

In our primary analysis for the *CYP2E1 DraI* polymorphism with six studies including 233 cases and 1272 controls, no significant association was observed using the fixed-effects model between the risk of ATDILI and the *DraI* polymorphism (OR for the D/D genotype = 0.93, 95% CI 0.68–1.27,  $P = 0.64$ ;  $I^2 = 0\%$ ,  $P_{heterogeneity} = 0.51$ ) (Figure 2B).

## ***NAT2***

1  
2  
3  
4 Overall, 35 studies with 1323 cases and 7319 controls were included in our primary analysis for  
5  
6 the *NAT2* polymorphism. Using the random-effects model, the pooled estimates of all included  
7  
8 studies ( $n = 35$ ) showed a significant association between the risk of ATDILI and the *NAT2*  
9  
10 polymorphism (OR for the slow acetylator genotype = 3.30, 95% CI 2.65–4.11,  $P < 0.00001$ ;  $I^2 =$   
11  
12 54%,  $P_{heterogeneity} < 0.0001$ ) (Figure 3). In the subgroup analysis based on ethnicity, anti-  
13  
14 tuberculosis drug regimens used, and study design, the risk of ATDILI was significantly  
15  
16 increased in slow acetylators compared to fast or intermediate acetylators in all subgroups (S10  
17  
18 Table).

## 21 ***GST***

22  
23  
24  
25 For the *GSTM1* polymorphism, a total of 19 studies with 977 cases and 5119 controls were  
26  
27 included in our primary analysis. Using the fixed-effects model, the pooled estimates of all  
28  
29 included studies ( $n = 19$ ) showed a significant association between the risk of ATDILI and the  
30  
31 *GSTM1* polymorphism (OR for the *GSTM1* null genotype = 1.30, 95% CI 1.12–1.52,  $P = 0.0007$ ;  
32  
33  $I^2 = 33\%$ ,  $P_{heterogeneity} = 0.08$ ) (Figure 4A). When studies were stratified for ethnicity, the risk of  
34  
35 ATDILI was significantly increased for the *GSTM1* null genotype in Indians (OR = 1.68, 95% CI  
36  
37 1.30–2.19,  $P < 0.0001$ ;  $I^2 = 36\%$ ,  $P_{heterogeneity} = 0.15$ ) (S11 Table). In the subgroup analyses by  
38  
39 study design, the estimated OR (95% CI,  $P$ -value;  $I^2$ ,  $P_{heterogeneity}$ ) for the *GSTM1* null genotype  
40  
41 relative to the non-null genotype was 1.41 (1.04-1.93,  $P = 0.03$ ;  $I^2 = 44\%$ ,  $P_{heterogeneity} = 0.08$ ) in  
42  
43 cohort studies and 1.25 (1.01-1.55,  $P = 0.20$ ;  $I^2 = 29\%$ ,  $P_{heterogeneity} = 0.17$ ) in case-control studies,  
44  
45 respectively (S11 Table).  
46  
47  
48  
49

50  
51 For the *GSTT1* and *GSTM1/GSTT1* polymorphisms, 17 studies (768 cases, 4823 controls)  
52  
53 and 11 studies (547 cases, 4233 controls) were included in our primary analyses, respectively.  
54  
55



1  
2  
3  
4 The risk of ATDILI was not significantly associated with the *GSTT1* polymorphism (OR for the  
5 null genotype = 1.03, 95% CI 0.85–1.25,  $P = 0.76$ ;  $I^2 = 16\%$ ,  $P_{heterogeneity} = 0.26$ ) or the  
6  
7  
8  
9 *GSTM1/GSTT1* polymorphism (OR for the dual-null genotype = 1.05, 95% CI 0.67–1.62,  $P =$   
10  
11 0.84;  $I^2 = 59\%$ ,  $P_{heterogeneity} = 0.006$ ) (Figures 4B and 4C). When studies were stratified for  
12  
13 ethnicity, anti-tuberculosis drug regimens used, and study design, no subgroups showed  
14  
15 significant association between the risk of ATDILI and the *GSTT1* and the *GSTM1/GSTT1*  
16  
17 polymorphisms (S11 Table).

## 20 ***SLCO1B1***

21  
22  
23 For the *SLCO1B1* 388A>G polymorphism, four studies with 302 cases and 913 controls were  
24  
25 included in our primary analysis. Using the dominant, recessive, or additive genomic model, no  
26  
27 significant association was observed between the risk of ATDILI and the *SLCO1B1* 388A>G  
28  
29 polymorphism (Table 2). For the *SLCO1B1* 521T>C polymorphism, four studies with 314 cases  
30  
31 and 912 controls were included in our primary analysis. No significant association was found  
32  
33 between the ATDILI risk and the *SLCO1B1* 521T>C polymorphism under the dominant,  
34  
35 recessive, or additive genetic model (Table 2). Due to the lack of significant association between  
36  
37 the risk of ATDILI and the tested *SLCO1B1* genetic polymorphisms in our primary meta-  
38  
39 analysis, subgroup analyses were not performed for these genetic polymorphisms.  
40  
41  
42  
43

## 44 **Sensitivity analysis**

45  
46  
47 Our primary analysis results showed significantly high heterogeneity between studies for  
48  
49 *CYP2E1* *RsaI/PstI* ( $I^2 = 60\%$ ,  $P < 0.0001$ ), *NAT2* ( $I^2 = 54\%$ ,  $P < 0.0001$ ), *GSTM1/GSTT1* ( $I^2 =$   
50  
51 59%,  $P = 0.006$ ), and *SLCO1B1* 521T>C (dominant genetic model:  $I^2 = 66\%$ ,  $P = 0.03$ )  
52  
53 polymorphisms. This high heterogeneity between studies may be due to substantial differences in  
54  
55  
56  
57  
58  
59  
60

1  
2  
3  
4 ethnicity, anti-tuberculosis drug regimen, the genotyping method used, study design, and  
5  
6 diagnostic criteria of ATDILI among the included studies (Table 1). Through the sensitivity  
7  
8 analyses, outlier studies were identified as the major source of heterogeneity. After removing  
9  
10 these outlier studies, heterogeneity was substantially reduced ( $I^2 = 60\%$  to  $42\%$  for *CYP2E1*  
11  
12 *RsaI/PstI*<sup>23</sup>,  $I^2 = 54\%$  to  $34\%$  for *NAT2*<sup>24 25</sup>,  $I^2 = 59\%$  to  $0\%$  for *GSTM1/GSTT1*<sup>26 27</sup>, and  $I^2 =$   
13  
14  $66\%$  to  $0\%$  for *SLCO1B1* 521T>C dominant genetic model<sup>28</sup>). The overall results for the  
15  
16 association between the risk of ATDILI and these genetic polymorphisms after excluding the  
17  
18 outlier studies stayed the same as those from our primary analysis results.  
19  
20  
21  
22  
23  
24

## 25 Discussion

26  
27  
28 In this study, we conducted a large-scale meta-analysis evaluating the association between the  
29  
30 risk of ATDILI and genetic polymorphisms of *SLCO1B1* as well as various DMEs including  
31  
32 *CYP2E1*, *NAT2*, and *GST* to provide more updated, comprehensive, and compelling evidence.  
33  
34 Compared with previous meta-analyses, our present study included a larger number of studies,  
35  
36 which may sufficiently increase the statistical power compared to individual studies. However,  
37  
38 a limited number of studies for the *SLCO1B1* genetic polymorphisms were included ( $n = 4$ ).  
39  
40 Consistently with previous studies, our current study suggested a significantly increased risk of  
41  
42 ATDILI in patients with the *CYP2E1 RsaI/PstI* c1/c1 genotype (OR = 1.39, 95% CI 1.06–1.83),  
43  
44 the *NAT2* slow acetylator genotype (OR = 3.30, 95% CI 2.65–4.11), and the *GSTM1* null  
45  
46 genotype (OR = 1.30, 95% CI 1.12–1.52)<sup>9 12 29</sup>. Among these genotypes, the largest increase in  
47  
48 the risk of ATDILI was shown in patients with the *NAT2* slow acetylator genotype. In contrast,  
49  
50 no significant association was observed between the risk of ATDILI and the genetic  
51  
52  
53  
54  
55  
56  
57  
58  
59  
60

1  
2  
3  
4 polymorphisms of *CYP2E1 DraI*, *GSTT1*, *GSTM1/GSTT1*, *SLCO1B1 388A>G*, and *SLCO1B1*  
5  
6 *521T>C*. Caution needs to be exercised when interpreting this study finding because the lack of  
7  
8 significant association between these polymorphisms and the risk of ATDILI might be due to  
9  
10 small sample sizes and the low frequency of ATDILI reported in patients with these genetic  
11  
12 polymorphisms.  
13  
14

15  
16 When evaluating the impact of the *CYP2E1 RsaI/PstI* and *DraI* genetic polymorphisms  
17  
18 on the risk of ATDILI in our study, patients with the *RsaI/PstI* c1/c1 genotype were 1.39-times  
19  
20 more likely to develop ATDILI. Similarly, in a previous meta-analysis by Deng and colleagues,  
21  
22 the risk of ATDILI was 1.4-times higher in patients with the *RsaI/PstI* c1/c1 genotype compared  
23  
24 to other genotypes<sup>30</sup>. In the liver, INH is metabolized by NAT2 to acetylisoniazid which is  
25  
26 consequently oxidized by CYP2E1 to reactive hepatotoxic intermediates<sup>31 32</sup>. The increased  
27  
28 inducibility or greater activity of CYP2E1 in patients with the *CYP2E1 RsaI/PstI* c1/c1 genotype  
29  
30 may result in the production of more intermediate hepatotoxins, ultimately leading to the  
31  
32 increased risk of ATDILI<sup>31 32</sup>. Our subgroup analysis showed a significantly increased risk of  
33  
34 ATDILI in the *CYP2E1 RsaI/PstI* c1/c1 genotype carriers of East Asian ethnicity (S9 Table),  
35  
36 suggesting a potential gene-ethnicity interaction<sup>33</sup>. A previous study identified age, female sex,  
37  
38 white race, non-Hispanic ethnicity, lower body mass index, elevated plasma aspartate  
39  
40 transaminase concentrations at baseline, and nine months of daily INH use as risk factors for  
41  
42 ATDILI<sup>34</sup>. Considering their race, ethnicity, and relatively lower body mass index compared to  
43  
44 other ethnicities, East Asians may be at an increased risk of ATDILI. As the *CYP2E1 RsaI/PstI*  
45  
46 c1 allele frequency is relatively low in this population (79.8% vs. 88.5% to 99.8% in other  
47  
48 ethnicities), the ethnicity itself might play an important role in developing hepatotoxicity through  
49  
50 gene-ethnicity interaction<sup>35</sup>. Furthermore, the relatively high frequency of c2 allele in this  
51  
52  
53  
54  
55  
56  
57  
58  
59  
60

1  
2  
3  
4 population might serve as a good control to estimate the effect of c1 allele on the risk of  
5  
6  
7  
8  
9  
10  
11  
12  
13  
14  
15  
16  
17  
18  
19  
20  
21  
22  
23  
24  
25  
26  
27  
28  
29  
30  
31  
32  
33  
34  
35  
36  
37  
38  
39  
40  
41  
42  
43  
44  
45  
46  
47  
48  
49  
50  
51  
52  
53  
54  
55  
56  
57  
58  
59  
60

population might serve as a good control to estimate the effect of c1 allele on the risk of  
ATDILI; the rarity of this minor allele in other ethnicities could make it difficult to evaluate the  
association between the ATDILI risk and this genetic polymorphism<sup>35</sup>. In addition to ethnicity,  
combination anti-tuberculosis therapy was shown to significantly increase the risk of ATDILI in  
patients with the *CYP2E1* *RsaI/PstI* c1/c1 genotype (S9 Table). This is consistent with previous  
study findings because hepatotoxicity commonly occurs with anti-tuberculosis drugs such as  
INH and RIF and thus, use of more than one hepatotoxic anti-tuberculosis medication increases  
the risk of ATDILI<sup>7</sup>.

Similar to previous studies, our current study suggested a significantly increased risk of  
ATDILI in patients with the *NAT2* slow acetylator genotype compared to those with  
intermediate/fast acetylator genotypes<sup>9,29</sup>. The risk of ATDILI in slow acetylators remained  
significantly increased in all tested subgroups regardless of ethnicity and the anti-tuberculosis  
drug regimen used (S10 Table). The frequencies of *NAT2* slow acetylator alleles are highly  
variable between ethnic groups, ranging from 32% in Koreans to 76% in Caucasians<sup>36</sup>. Despite  
this large inter-ethnic variability in the *NAT2* polymorphic allele frequency, the *NAT2* slow  
acetylator genotype consistently and significantly increased the risk of ATDILI across all  
ethnicities, suggesting the critical role of *NAT2* polymorphism in the development of ATDILI. In  
addition, the increased risk of ATDILI in slow acetylators receiving INH monotherapy or  
combination therapy further highlights the importance of the *NAT2* polymorphism in the  
development of INH-induced hepatotoxicity. The clearance of INH is slower in slow acetylators  
compared to rapid or intermediate acetylators, resulting in the accumulation of INH in these  
patients<sup>37,38</sup>. This high level of INH may increase the risk of ATDILI in patients with  
tuberculosis carrying *NAT2* slow acetylator genotype due to immune-mediated liver injury

1  
2  
3  
4 through the binding of INH to liver proteins<sup>39</sup>. Therefore, clinicians should closely monitor  
5  
6 patients with tuberculosis carrying the *NAT2* slow acetylator genotype for hepatotoxicity when  
7  
8 INH-based treatment is administered to these patients.  
9

10  
11 According to previous studies, GST enzymes, particularly those coded by *GSTM1* and  
12  
13 *GSTT1* loci, are associated with the risk of drug-induced hepatotoxicity<sup>9 40</sup>. Similar to previous  
14  
15 studies, our current study demonstrated a significantly increased risk of ATDILI in individuals  
16  
17 with the *GSTM1* null genotype compared to those with the non-null genotype; however, the risk  
18  
19 of ATDILI was not affected by the *GSTT1* or *GSTM1/GSTT1* genetic polymorphisms. GSTs are  
20  
21 important enzymes to detoxify various xenobiotics and play an essential role in INH metabolism  
22  
23 by eliminating acetyldiazene ketene acetylonium ion, which is a possibly hepatotoxic free radical  
24  
25 metabolite of INH, from the body through *GSTM1*. This may account for the significant  
26  
27 association of the ATDILI risk with the *GSTM1* genotype, but not with the *GSTT1* or  
28  
29 *GSTM1/GSTT1* genotypes<sup>9 40</sup>. Our subgroup analysis showed a significantly increased risk of  
30  
31 ATDILI in the *GSTM1* null genotype carriers of Indian ethnicity; although not statistically  
32  
33 significant, the risk of ATDILI was relatively high in the East Asian population with the *GSTM1*  
34  
35 null genotype (S11 Table). Considering the substantial difference in the *GSTM1* null allele  
36  
37 frequency between Indians (29.6%) and East Asians (52.1%), a potential gene-ethnicity  
38  
39 interaction may exist based on their race, ethnicity, and body size as aforementioned<sup>34 41</sup>. Other  
40  
41 characteristics than the *GSTM1* polymorphism in these ethnicities may play a more important  
42  
43 role in the development of ATDILI. In addition, when studies were stratified by study design, the  
44  
45 risk of ATDILI was significantly increased in patients with the *GSTM1* null genotype for cohort  
46  
47 studies only, but not for case-control studies, probably due to a relatively larger sample size with  
48  
49 cohort studies compared to case-control studies.  
50  
51  
52  
53  
54  
55

1  
2  
3  
4 *SLCO1B1* encodes organic anion transporting polypeptide 1B1 (OATP1B1) which is a  
5 major influx drug transporter responsible for the hepatic uptake of various endogenous and  
6  
7 exogenous substances including RIF<sup>42</sup>. Previous studies showed significantly altered systemic  
8  
9 exposure of RIF in carriers of the *SLCO1B1* polymorphism<sup>43 44</sup>. To our knowledge, only four  
10  
11 studies have been conducted to examine the association between the ATDILI risk and the  
12  
13 *SLCO1B1* genetic polymorphisms<sup>10 28 42 45</sup>. Various single nucleotide polymorphisms (SNPs) of  
14  
15 *SLCO1B1* were evaluated in these studies; however, *SLCO1B1* 388A>G (rs2306283) and  
16  
17 521T>C (rs4149056) were the only polymorphisms assessed in common<sup>10 28 42 45</sup>. Therefore, to  
18  
19 maximize the sample size in our current meta-analysis, we examined the association between the  
20  
21 risk of ATDILI and the polymorphic genotypes of *SLCO1B1* 388A>G and 521T>C. Similar to  
22  
23 each of the included studies, we did not find significant difference in the risk of ATDILI among  
24  
25 patients with different *SLCO1B1* 388A>G and 521T>C genotypes.  
26  
27  
28  
29  
30

31  
32 There are limitations to this study. First, due to the lack of information regarding other  
33  
34 patient characteristics potentially associated with ATDILI, our estimated ORs were not adjusted  
35  
36 based on the potential risk factors such as age, anti-tuberculosis drug dosages, alcohol  
37  
38 consumption, cigarette smoking, and other lifestyle characteristics<sup>7 46</sup>. Second, our literature  
39  
40 search limited to the articles published in English may lead to language bias. Third, a specific  
41  
42 causative agent of ATDILI could not be identified in our analysis because most patients in our  
43  
44 included studies received a combination regimen of anti-tuberculosis drugs. Fourth, only the  
45  
46 limited number of polymorphic genotypes were assessed for the association with the risk of  
47  
48 ATDILI, particularly for *SLCO1B1*. In addition, only one genetic model was used for *CYP2E1*,  
49  
50 *NAT2*, and *GST* when evaluating the association between genetic polymorphisms of these genes  
51  
52 and the risk of ATDILI. Although we acknowledge dominant, recessive, and additive genomic  
53  
54  
55  
56

1  
2  
3  
4 models can be used for two alleles, it could not be applied to our meta-analysis because we  
5  
6 compared patients with different genotype-based phenotype, i.e., slow acetylator vs.  
7  
8 fast/intermediate acetylator and null vs. non-null *GSTs*. Multiple allelic variants or allele  
9  
10 subgroups may represent the same phenotype (e.g., *NAT2*\*5B, \*6A, and \*7B all represent slow  
11  
12 acetylator genotypes), and the genetic model selection can be varied depending on the specific  
13  
14 allelic variant<sup>47</sup>. Therefore, the genetic models used in previous original and meta-analysis  
15  
16 studies were adopted for these polymorphic genes in our current study<sup>9 18 19</sup>. Future studies are  
17  
18 needed to comprehensively and adequately address the relationship between the ATDILI risk and  
19  
20 various genetic polymorphisms by using different genetic risk models and including more  
21  
22 polymorphic genotypes.  
23  
24  
25

26  
27 In conclusion, the risk of ATDILI during tuberculosis therapy was significantly increased  
28  
29 in patients with tuberculosis carrying *NAT2* slow acetylator, *CYP2E1* *RsaI/PstI* c1/c1, or *GSTM1*  
30  
31 null genotypes. Screening for these genetic polymorphisms, particularly for the *NAT2* slow  
32  
33 acetylator genotype, may be of great clinical benefit to identify patients at high risk for ATDILI  
34  
35 and minimize the risk of ATDILI. Future studies are pertinent to develop dose and/or treatment  
36  
37 adjustment strategies, to evaluate the feasibility and cost-effectiveness of the genetic screening  
38  
39 test, and to assess the effect of more genetic polymorphisms on the risk of ATDILI for optimal  
40  
41 prevention and management of ATDILI.  
42  
43  
44  
45  
46  
47  
48  
49

## 50 **Acknowledgments**

51  
52  
53 This study was supported by Research Resettlement Fund for the new faculty of Seoul National  
54  
55 University. The authors thank Ms. Kyeoul Jeong for her assistance in data management.  
56

## Contributors

S.Y. devised and designed the study. S.Y., J.Y.P., and S.J.H. conducted the literature search, performed data extraction and analysis, and interpreted the data. S.Y., E.K.C., and J.I.L. prepared and reviewed the manuscript. All authors reviewed, amended and approved the submitted manuscript

## Funding

Research Resettlement Fund for the new faculty of Seoul National University provided funding to Jangik I. Lee. The funder had no role in data collection, data analysis, translation, and drafting of the manuscript

## Competing interests

None declared

## Patient consent

Not required

## Provenance and peer review



1  
2  
3  
4  
5  
6  
7  
8  
9  
10  
11  
12  
13  
14  
15  
16  
17  
18  
19  
20  
21  
22  
23  
24  
25  
26  
27  
28  
29  
30  
31  
32  
33  
34  
35  
36  
37  
38  
39  
40  
41  
42  
43  
44  
45  
46  
47  
48  
49  
50  
51  
52  
53  
54  
55  
56  
57  
58  
59  
60

Not commissioned, externally peer reviewed

**Data sharing statement**

No additional unpublished data are available

For peer review only

## References

1. WHO. Global tuberculosis report Geneva, Switzerland: WHO, 2014.
2. WHO. Treatment of tuberculosis guidelines, 4th edition. Geneva, Switzerland: WHO, 2010.
3. Blumberg H, Burman W, Chaisson R, *et al.* American Thoracic Society/Centers for Disease Control and Prevention/Infectious Diseases Society of America: treatment of tuberculosis. *Am J Respir Crit Care Med* 2003;167:603.
4. Zumla A, Raviglione M, Hafner R, *et al.* Tuberculosis. *N Engl J Med* 2013;368:745-55.
5. Lange C, Abubakar I, Alffenaar J-WC, *et al.* Management of patients with multidrug-resistant/extensively drug-resistant tuberculosis in Europe: a TBNET consensus statement. *Eur Respir J* 2014;44:23-63.
6. Tostmann A, Boeree MJ, Aarnoutse RE, *et al.* Antituberculosis drug-induced hepatotoxicity: concise up-to-date review. *J Gastroenterol Hepatol* 2008;23:192-202.
7. Saukkonen JJ, Cohn DL, Jasmer RM, *et al.* An official ATS statement: hepatotoxicity of antituberculosis therapy. *Am J Respir Crit Care Med* 2006;174:935-52.
8. Yee D, Valiquette C, Pelletier M, *et al.* Incidence of serious side effects from first-line antituberculosis drugs among patients treated for active tuberculosis. *Am J Respir Crit Care Med* 2003;167:1472-7.
9. Cai Y, Yi J, Zhou C, *et al.* Pharmacogenetic Study of Drug-Metabolising Enzyme Polymorphisms on the Risk of Anti-Tuberculosis Drug-Induced Liver Injury: A Meta-Analysis. *PLoS ONE* 2012;7.
10. Kim SH, Kim SH, Lee JH, *et al.* Polymorphisms in drug transporter genes (ABCB1, SLCO1B1 and ABCC2) and hepatitis induced by antituberculosis drugs. *Tuberculosis* 2012;92:100-4.
11. Roy PD, Majumder M, Roy B. Pharmacogenomics of anti-TB drugs-related hepatotoxicity. *Pharmacogenomics* 2008;9:311-21.
12. Sun F, Chen Y, Xiang Y, *et al.* Drug-metabolising enzyme polymorphisms and predisposition to anti-tuberculosis drug-induced liver injury: a meta-analysis. *Int J Tuberc Lung Dis* 2008;12:994-1002.
13. Chan SL, Chua APG, Aminkeng F, *et al.* Association and clinical utility of NAT2 in the prediction of isoniazid-induced liver injury in Singaporean patients. *PloS one*

- 2017;12:e0186200.
14. Kerb R. Implications of genetic polymorphisms in drug transporters for pharmacotherapy. *Cancer Lett* 2006;234:4-33.
  15. Cui Y, Konig J, Leier I, *et al.* Hepatic uptake of bilirubin and its conjugates by the human organic anion transporter SLC21A6. *J Biol Chem* 2001;276:9626-30.
  16. Little J, Bradley L, Bray MS, *et al.* Reporting, appraising, and integrating data on genotype prevalence and gene-disease associations. *American journal of epidemiology* 2002;156:300-10.
  17. Tang N, Deng R, Wang Y, *et al.* GSTM1 and GSTT1 null polymorphisms and susceptibility to anti-tuberculosis drug-induced liver injury: a meta-analysis. *Int J Tuberc Lung Dis* 2013;17:17-25.
  18. Wang F-J, Wang Y, Niu T, *et al.* Update meta-analysis of the CYP2E1 RsaI/PstI and DraI polymorphisms and risk of antituberculosis drug-induced hepatotoxicity: evidence from 26 studies. *Journal of Clinical Pharmacy and Therapeutics* 2016;41:334-40.
  19. Li C, Long J, Hu X, *et al.* GSTM1 and GSTT1 genetic polymorphisms and risk of anti-tuberculosis drug-induced hepatotoxicity: an updated meta-analysis. *Eur J Clin Microbiol Infect Dis* 2013;32:859-68.
  20. Mantel N, Haenszel W. Statistical aspects of the analysis of data from retrospective studies of disease. *Journal of the national cancer institute* 1959;22:719-48.
  21. DerSimonian R, Laird N. Meta-analysis in clinical trials. *Controlled clinical trials* 1986;7:177-88.
  22. Higgins JP, Thompson SG. Quantifying heterogeneity in a meta-analysis. *Statistics in medicine* 2002;21:1539-58.
  23. Feng FM, Guo M, Chen Y, *et al.* Genetic polymorphisms in metabolic enzymes and susceptibility to anti-tuberculosis drug-induced hepatic injury. *Genetics and Molecular Research* 2014;13:9463-71.
  24. Lv X, Tang S, Xia Y, *et al.* NAT2 genetic polymorphisms and anti-tuberculosis drug-induced hepatotoxicity in Chinese community population. *Ann Hepatol* 2012;11:700-7.
  25. Wattanapokayakit S, Mushiroda T, Yanai H, *et al.* NAT2 slow acetylator associated with anti-tuberculosis drug-induced liver injury in Thai patients. *Int J Tuberc Lung Dis*

- 2016;20:1364-9.
26. Singla N, Gupta D, Birbian N, *et al.* Association of NAT2, GST and CYP2E1 polymorphisms and anti-tuberculosis drug-induced hepatotoxicity. *Tuberculosis* 2014;94:293-8.
  27. Gupta VH, Amarapurkar DN, Singh M, *et al.* Association of N-acetyltransferase 2 and cytochrome P450 2E1 gene polymorphisms with antituberculosis drug-induced hepatotoxicity in Western India. *Journal of Gastroenterology and Hepatology* 2013;28:1368-74.
  28. Li LM, Chen L, Deng GH, *et al.* SLCO1B1\*15 haplotype is associated with rifampin-induced liver injury. *Mol Med Rep* 2012;6:75-82.
  29. Wang PY, Xie SY, Hao Q, *et al.* NAT2 polymorphisms and susceptibility to anti-tuberculosis drug-induced liver injury: a meta-analysis. *Int J Tuberc Lung Dis* 2012;16:589-95.
  30. Deng R, Yang T, Wang Y, *et al.* CYP2E1 RsaI/PstI polymorphism and risk of anti-tuberculosis drug-induced liver injury: a meta-analysis. *Int J Tuberc Lung Dis* 2012;16:1574-81.
  31. Mitchell JR, Zimmerman HJ, Ishak KG, *et al.* Isoniazid liver injury: clinical spectrum, pathology, and probable pathogenesis. *Ann Intern Med* 1976;84:181-92.
  32. Ryan D, Ramanathan L, Iida S, *et al.* Characterization of a major form of rat hepatic microsomal cytochrome P-450 induced by isoniazid. *Journal of Biological Chemistry* 1985;260:6385-93.
  33. Ortega VE, Meyers DA. Pharmacogenetics: implications of race and ethnicity on defining genetic profiles for personalized medicine. *J Allergy Clin Immunol* 2014;133:16-26.
  34. Bliven-Sizemore EE, Sterling TR, Shang N, *et al.* Three months of weekly rifapentine plus isoniazid is less hepatotoxic than nine months of daily isoniazid for LTBI. *Int J Tuberc Lung Dis* 2015;19:1039-44, i-v.
  35. Zhou Y, Ingelman-Sundberg M, Lauschke VM. Worldwide distribution of cytochrome P450 alleles: a meta-analysis of population-scale sequencing projects. *Clinical Pharmacology & Therapeutics* 2017;102:688-700.
  36. Lin HJ, Han C-Y, Lin BK, *et al.* Ethnic distribution of slow acetylator mutations in the

- polymorphic N-acetyltransferase (NAT2) gene. *Pharmacogenetics* 1994;4:125-34.
37. Seng KY, Hee KH, Soon GH, *et al.* Population Pharmacokinetic Analysis of Isoniazid, Acetylisoniazid, and Isonicotinic Acid in Healthy Volunteers. *Antimicrobial Agents and Chemotherapy* 2015;59:6791-9.
38. Wang P, Pradhan K, Zhong XB, *et al.* Isoniazid metabolism and hepatotoxicity. *Acta Pharm Sin B* 2016;6:384-92.
39. Metushi IG, Nakagawa T, Uetrecht J. Direct oxidation and covalent binding of isoniazid to rodent liver and human hepatic microsomes: humans are more like mice than rats. *Chem Res Toxicol* 2012;25:2567-76.
40. Ramachandran G, Swaminathan S. Role of pharmacogenomics in the treatment of tuberculosis: a review. *Pharmgenomics Pers Med* 2012;5:89-98.
41. Kasthurinaidu SP, Ramasamy T, Ayyavoo J, *et al.* GST M1-T1 null allele frequency patterns in geographically assorted human populations: a phylogenetic approach. *PLoS One* 2015;10:e0118660.
42. Chen R, Wang J, Tang S, *et al.* Association of polymorphisms in drug transporter genes (SLCO1B1 and SLC10A1) and anti-tuberculosis drug-induced hepatotoxicity in a Chinese cohort. *Tuberculosis* 2015;95:68-74.
43. Weiner M, Peloquin C, Burman W, *et al.* Effects of tuberculosis, race, and human gene SLCO1B1 polymorphisms on rifampin concentrations. *Antimicrob Agents Chemother* 2010;54:4192-200.
44. Chigutsa E, Visser ME, Swart EC, *et al.* The SLCO1B1 rs4149032 polymorphism is highly prevalent in South Africans and is associated with reduced rifampin concentrations: dosing implications. *Antimicrob Agents Chemother* 2011;55:4122-7.
45. Yimer G, Ueda N, Habtewold A, *et al.* Pharmacogenetic & pharmacokinetic biomarker for efavirenz based ARV and rifampicin based anti-TB drug induced liver injury in TB-HIV infected patients. *PLoS One* 2011;6:e27810.
46. Chen R, Wang J, Zhang Y, *et al.* Key factors of susceptibility to anti-tuberculosis drug-induced hepatotoxicity. *Arch Toxicol* 2015;89:883-97.
47. Khan S, Mandal RK, Elasbali AM, *et al.* Pharmacogenetic association between NAT2 gene polymorphisms and isoniazid induced hepatotoxicity: trial sequence meta-analysis as

- evidence. *Bioscience reports* 2019;39:BSR20180845.
48. Kim SH, Kim SH, Bahn JW, *et al.* Genetic polymorphisms of drug-metabolizing enzymes and anti-TB drug-induced hepatitis. *Pharmacogenomics* 2009;10:1767-79.
49. Singh M, Gupta VH, Amarpurkar DN, *et al.* Association of genetic variants with anti-tuberculosis drug induced hepatotoxicity: A high resolution melting analysis. *Infection Genetics and Evolution* 2014;23:42-8.
50. Tang S, Lv X, Zhang Y, *et al.* Cytochrome P450 2E1 Gene Polymorphisms/Haplotypes and Anti-Tuberculosis Drug-Induced Hepatitis in a Chinese Cohort. *PLoS ONE* 2013;8:e57526.
51. Ben Mahmoud L, Ghazzi H, Kamoun A, *et al.* Polymorphism of the N-acetyltransferase 2 gene as a susceptibility risk factor for antituberculosis drug-induced hepatotoxicity in Tunisian patients with tuberculosis. *Pathologie Biologie* 2012;60:324-30.
52. Bozok Cetintas V, Erer OF, Kosova B, *et al.* Determining the relation between N-acetyltransferase-2 acetylator phenotype and antituberculosis drug induced hepatitis by molecular biologic tests. *Tuberk Toraks* 2008;56:81-6.
53. Higuchi N, Tahara N, Yanagihara K, *et al.* NAT2 6A, a haplotype of the N-acetyltransferase 2 gene, is an important biomarker for risk of anti-tuberculosis drug-induced hepatotoxicity in Japanese patients with tuberculosis. *World J Gastroenterol* 2007;13:6003-8.
54. Ho HT, Wang TH, Hsiong CH, *et al.* The NAT2 tag SNP rs1495741 correlates with the susceptibility of antituberculosis drug-induced hepatotoxicity. *Pharmacogenet Genomics* 2013;23:200-7.
55. Huang YS, Chern HD, Su WJ, *et al.* Polymorphism of the N-acetyltransferase 2 gene as a susceptibility risk factor for antituberculosis drug-induced hepatitis. *Hepatology* 2002;35:883-9.
56. Khalili H, Fouladdel S, Sistanizad M, *et al.* Association of N-acetyltransferase-2 genotypes and anti-tuberculosis induced liver injury: First case-controlled study from Iran. *Current Drug Safety* 2011;6:17-22.
57. Leiro-Fernandez V, Valverde D, Vazquez-Gallardo R, *et al.* N-acetyltransferase 2 polymorphisms and risk of anti-tuberculosis drug-induced hepatotoxicity in Caucasians.

- 1  
2  
3  
4  
5  
6  
7  
8  
9  
10  
11  
12  
13  
14  
15  
16  
17  
18  
19  
20  
21  
22  
23  
24  
25  
26  
27  
28  
29  
30  
31  
32  
33  
34  
35  
36  
37  
38  
39  
40  
41  
42  
43  
44  
45  
46  
47  
48  
49  
50  
51  
52  
53  
54  
55  
56  
57  
58  
59  
60
- International Journal of Tuberculosis and Lung Disease* 2011;15:1403-8.
58. Ng CS, Hasnat A, Al Maruf A, *et al.* N-acetyltransferase 2 (NAT2) genotype as a risk factor for development of drug-induced liver injury relating to antituberculosis drug treatment in a mixed-ethnicity patient group. *European Journal of Clinical Pharmacology* 2014;70:1079-86.
59. Ohno M, Yamaguchi I, Yamamoto I, *et al.* Slow N-acetyltransferase 2 genotype affects the incidence of isoniazid and rifampicin-induced hepatotoxicity. *International Journal of Tuberculosis and Lung Disease* 2000;4:256-61.
60. Possuelo LG, Castelan JA, de Brito TC, *et al.* Association of slow N-acetyltransferase 2 profile and anti-TB drug-induced hepatotoxicity in patients from Southern Brazil. *European Journal of Clinical Pharmacology* 2008;64:673-81.
61. Rana SV, Ola RP, Sharma SK, *et al.* Comparison between acetylator phenotype and genotype polymorphism of n-acetyltransferase-2 in tuberculosis patients. *Hepatology International* 2012;6:397-402.
62. Shimizu Y, Dobashi K, Mita Y, *et al.* DNA microarray genotyping of N-acetyltransferase 2 polymorphism using carbodiimide as the linker for assessment of isoniazid hepatotoxicity. *Tuberculosis* 2006;86:374-81.
63. Yuliwulandari R, Susilowati RW, Wicaksono BD, *et al.* NAT2 variants are associated with drug-induced liver injury caused by anti-tuberculosis drugs in Indonesian patients with tuberculosis. *J Hum Genet* 2016; doi:10.1038/jhg.2016.10.
64. Chatterjee S, Lyle N, Mandal A, *et al.* GSTT1 and GSTM1 gene deletions are not associated with hepatotoxicity caused by antitubercular drugs. *Journal of Clinical Pharmacy and Therapeutics* 2010;35:465-70.
65. Gupta VH, Singh M, Amarpurkar DN, *et al.* Association of GST null genotypes with anti-tuberculosis drug induced hepatotoxicity in Western Indian population. *Annals of Hepatology* 2013;12:959-65.
66. Huang YS, Su WJ, Huang YH, *et al.* Genetic polymorphisms of manganese superoxide dismutase, NAD(P)H : quinone oxidoreductase, glutathione S-transferase M1 and T1, and the susceptibility to drug-induced liver injury. *Journal of Hepatology* 2007;47:128-34.
67. Kim SH, Kim SH, Yoon HJ, *et al.* GSTT1 and GSTM1 null mutations and adverse



- 1  
2  
3  
4 reactions induced by antituberculosis drugs in Koreans. *Tuberculosis* 2010;90:39-43.
- 5  
6 68. Leiro V, Fernandez-Villar A, Valverde D, *et al.* Influence of glutathione S-transferase M1  
7 and T1 homozygous null mutations on the risk of antituberculosis drug-induced  
8 hepatotoxicity in a Caucasian population. *Liver International* 2008;28:835-9.
- 9  
10  
11 69. Liu F, Jiao AX, Wu XR, *et al.* Impact of Glutathione S-Transferase M1 and T1 on Anti-  
12 Tuberculosis Drug-Induced Hepatotoxicity in Chinese Pediatric Patients. *Plos One* 2014;9.
- 13  
14 70. Monteiro TP, El-Jaick KB, Jeovanio-Silva AL, *et al.* The roles of GSTM1 and GSTT1 null  
15 genotypes and other predictors in anti-tuberculosis drug-induced liver injury. *Journal of*  
16  
17 *Clinical Pharmacy and Therapeutics* 2012;37:712-8.
- 18  
19 71. Rana SV, Kamboj JK, Sharma SK, *et al.* Antioxidant status and GST gene polymorphisms  
20 in antitubercular treatment-induced hepatotoxicity patients. *Hepatol Int* 2013;7:876-82.
- 21  
22 72. Roy B, Chowdhury A, Kundu S, *et al.* Increased risk of antituberculosis drug-induced  
23 hepatotoxicity in individuals with glutathione S-transferase M1 'null' mutation. *Journal of*  
24  
25 *Gastroenterology and Hepatology* 2001;16:1033-7.
- 26  
27 73. An HR, Wu XQ, Wang ZY, *et al.* NAT2 and CYP2E1 polymorphisms associated with  
28 antituberculosis drug-induced hepatotoxicity in Chinese patients. *Clinical and*  
29  
30 *Experimental Pharmacology and Physiology* 2012;39:535-43.
- 31  
32 74. Bose PD, Sarma MP, Medhi S, *et al.* Role of polymorphic N-acetyl transferase2 and  
33 cytochrome P4502E1 gene in antituberculosis treatment-induced hepatitis. *Journal of*  
34  
35 *Gastroenterology and Hepatology* 2011;26:312-8.
- 36  
37 75. Chamorro JG, Castagnino JP, Musella RM, *et al.* Sex, ethnicity, and slow acetylator profile  
38 are the major causes of hepatotoxicity induced by antituberculosis drugs. *Journal of*  
39  
40 *Gastroenterology and Hepatology* 2013;28:323-8.
- 41  
42 76. Cho HJ, Koh WJ, Ryu YJ, *et al.* Genetic polymorphisms of NAT2 and CYP2E1 associated  
43 with antituberculosis drug-induced hepatotoxicity in Korean patients with pulmonary  
44 tuberculosis. *Tuberculosis* 2007;87:551-6.
- 45  
46 77. Huang YS, Chern HD, Su WJ, *et al.* Cytochrome p450 2E1 genotype and the susceptibility  
47 to antituberculosis drug-induced hepatitis. *Hepatology* 2003;37:924-30.
- 48  
49 78. Lee SW, Chung LS, Huang HH, *et al.* NAT2 and CYP2E1 polymorphisms and  
50 susceptibility to first-line anti-tuberculosis drug-induced hepatitis. *Int J Tuberc Lung Dis*  
51  
52  
53  
54  
55  
56  
57  
58  
59  
60



- 2010;14:622-6.
79. Mishra S, Daschakraborty S, Shukla P, *et al.* N-acetyltransferase and cytochrome P450 2E1 gene polymorphisms and susceptibility to antituberculosis drug hepatotoxicity in an Indian population. *National Medical Journal of India* 2013;26:260-5.
80. Santos NP, Callegari-Jacques SM, Ribeiro Dos Santos AK, *et al.* N-acetyl transferase 2 and cytochrome P450 2E1 genes and isoniazid-induced hepatotoxicity in Brazilian patients. *Int J Tuberc Lung Dis* 2013;17:499-504.
81. Vuilleumier N, Rossier MF, Chiappe A, *et al.* CYP2E1 genotype and isoniazid-induced hepatotoxicity in patients treated for latent tuberculosis. *Eur J Clin Pharmacol* 2006;62:423-9.
82. Yamada S, Tang M, Richardson K, *et al.* Genetic variations of NAT2 and CYP2E1 and isoniazid hepatotoxicity in a diverse population. *Pharmacogenomics* 2009;10:1433-45.
83. Zaverucha-do-Valle C, Monteiro SP, El-Jaick KB, *et al.* The role of cigarette smoking and liver enzymes polymorphisms in anti-tuberculosis drug-induced hepatotoxicity in Brazilian patients. *Tuberculosis (Edinb)* 2014;94:299-305.
84. Sharma SK, Jha BK, Sharma A, *et al.* Genetic polymorphisms of CYP2E1 and GSTM1 loci and susceptibility to anti-tuberculosis drug-induced hepatotoxicity. *International Journal of Tuberculosis and Lung Disease* 2014;18:588-93.
85. Wang T, Yu HT, Wang W, *et al.* Genetic Polymorphisms of Cytochrome P450 and Glutathione S-transferase Associated with Antituberculosis Drug-induced Hepatotoxicity in Chinese Tuberculosis Patients. *Journal of International Medical Research* 2010;38:977-86.
86. Tang SW, Lv XZ, Zhang Y, *et al.* CYP2E1, GSTM1 and GSTT1 genetic polymorphisms and susceptibility to antituberculosis drug-induced hepatotoxicity: a nested case-control study. *Journal of Clinical Pharmacy and Therapeutics* 2012;37:588-93.
87. Brito TC, Possuelo LG, Valim ARM, *et al.* Polymorphisms in CYP2E1, GSTM1 and GSTT1 and anti-tuberculosis drug-induced hepatotoxicity. *Anais Da Academia Brasileira De Ciencias* 2014;86:855-65.
88. Forestiero FJ, Cecon L, Hirata MH, *et al.* Relationship of NAT2, CYP2E1 and GSTM1/GSTT1 polymorphisms with mild elevation of liver enzymes in Brazilian

- 1  
2  
3  
4 individuals under anti-tuberculosis drug therapy. *Clinica Chimica Acta* 2013;415:215-9.  
5  
6 89. Rana SV, Sharma SK, Ola RP, *et al.* N-acetyltransferase 2, cytochrome P4502E1 and  
7  
8 glutathione S-transferase genotypes in antitubercular treatment-induced hepatotoxicity in  
9  
10 North Indians. *J Clin Pharm Ther* 2014;39:91-6.  
11  
12 90. Sotsuka T, Sasaki Y, Hirai S, *et al.* Association of Isoniazid-metabolizing Enzyme  
13  
14 Genotypes and Isoniazid-induced Hepatotoxicity in Tuberculosis Patients. *In Vivo*  
15  
16 2011;25:803-12.  
17  
18 91. Teixeira RL, Morato RG, Cabello PH, *et al.* Genetic polymorphisms of NAT2, CYP2E1  
19  
20 and GST enzymes and the occurrence of antituberculosis drug-induced hepatitis in  
21  
22 Brazilian TB patients. *Mem Inst Oswaldo Cruz* 2011;106:716-24.  
23  
24 92. Xiang Y, Ma L, Wu WD, *et al.* The Incidence of Liver Injury in Uyghur Patients Treated  
25  
26 for TB in Xinjiang Uyghur Autonomous Region, China, and Its Association with Hepatic  
27  
28 Enzyme Polymorphisms NAT2, CYP2E1, GSTM1 and GSTT1. *Plos One* 2014;9.  
29  
30  
31  
32  
33  
34  
35  
36  
37  
38  
39  
40  
41  
42  
43  
44  
45  
46  
47  
48  
49  
50  
51  
52  
53  
54  
55  
56  
57  
58  
59  
60

## Supporting information

Additional supporting information can be found in the online version of this article:

**S1 Table. Completed MOOSE (Meta-analysis Of Observational Studies in Epidemiology) checklist**

**S2 Table. Search strategies**

**S3 Table. Study quality assessment**

**S4 Table. Genotype distribution and the genotyping method used for the *CYP2E1* genetic polymorphisms in the included studies (n = 26)**

**S5 Table. Genotype distribution and the genotyping method used for the *NAT2* genetic polymorphism in the included studies (n = 35)**

**S6 Table. Genotype distribution and the genotyping method used for the *GST* genetic polymorphisms in the included studies (n = 19)**

**S7 Table. Genotype distribution and the genotyping method used for the *SLCO1B1* genetic polymorphisms in the included studies (n = 4)**

**S8 Figure. Funnel plots to evaluate publication bias for the *CYP2E1*, *NAT2*, *GST*, and *SLCO1B1* polymorphisms associated with the risk of anti-tuberculosis drug-induced liver injury. (A) *CYP2E1* *RsaI/PstI* polymorphism, (B) *CYP2E1* *DraI* polymorphism, (C) *NAT2* polymorphism, (D) *GSTM1* polymorphism, (E) *GSTT1* polymorphism, (F) *GSTT1/MI* polymorphism, and (G) *SLCO1B1* 388A>G and 521T>C polymorphism.**

**S9 Table. Subgroup analysis for the association between *CYP2E1* polymorphisms and the risk of anti-tuberculosis drug-induced liver injury based on ethnicity, anti-tuberculosis drug regimen, and study design**

1  
2  
3  
4 **S10 Table. Subgroup analysis for the association between *NAT2* polymorphism and the risk**  
5 **of anti-tuberculosis drug-induced liver injury based on ethnicity, anti-tuberculosis drug**  
6 **regimen, and study design**  
7  
8  
9

10  
11 **S11 Table. Subgroup analysis for the association between *GST* polymorphisms and the risk**  
12 **of anti-tuberculosis drug-induced liver injury based on ethnicity, anti-tuberculosis drug**  
13 **regimen, and study design**  
14  
15  
16  
17  
18  
19  
20  
21  
22  
23  
24  
25  
26  
27  
28  
29  
30  
31  
32  
33  
34  
35  
36  
37  
38  
39  
40  
41  
42  
43  
44  
45  
46  
47  
48  
49  
50  
51  
52  
53  
54  
55  
56  
57  
58  
59  
60

## Figure legends

**Figure 1.** Study selection process flowchart.

**Figure 2.** Risk of anti-tuberculosis drug-induced liver injury in patients with the *CYP2E1* (A) *RsaI/PstI* c1/c1 genotype compared to c1/c2 + c2/c2 genotypes and (B) *DraI* D/D genotype compared to D/C + C/C genotypes.

**Figure 3.** Risk of anti-tuberculosis drug-induced liver injury in patients with the *NAT2* slow acetylator genotype compared to those with the intermediate/fast acetylator genotypes.

**Figure 4.** Risk of anti-tuberculosis drug-induced liver injury in patients with (A) the *GSTM1* null genotype compared to the non-null genotype, (B) the *GSTT1* null genotype compared to the non-null genotype, and (C) the *GSTM1/GSTT1* dual-null genotype compared to the one- and non-null genotypes.

**Table 1.** Characteristics of the studies included in the meta-analysis (n = 54 studies)

| Last name of the first author, year | Polymorphic gene | Study design | Ethnicity | Sample size (case/control) | Age (years) (case/control) <sup>a</sup> | Male (%) (case/control) | Anti-TB drug regimen administered | Diagnostic criteria of ATDILI | Quality score <sup>d</sup> |
|-------------------------------------|------------------|--------------|-----------|----------------------------|-----------------------------------------|-------------------------|-----------------------------------|-------------------------------|----------------------------|
| Feng, 2014 <sup>23</sup>            | <i>CYP2E1</i>    | Case-control | Chinese   | 173/173                    | 48.8/48.6                               | 68.0/68.0               | INH, RIF, PZA                     | ALT > 3 × ULN                 | 6                          |
| Kim, 2009 <sup>48</sup>             | <i>CYP2E1</i>    | Case-control | Korean    | 67/159                     | 42.1/42.8                               | 65.7/65.4               | INH, RIF, PZA, EMB                | ALT > 2 × ULN                 | 7                          |
| Singh, 2014 <sup>49</sup>           | <i>CYP2E1</i>    | Cohort       | Indian    | 50/135                     | NA/NA                                   | NA/NA                   | NA                                | ALT > 2 × ULN                 | 7                          |
| Tang, 2013 <sup>50</sup>            | <i>CYP2E1</i>    | Case-control | Chinese   | 89/356                     | 43.7/43.6                               | 73.0/73.0               | INH, RIF, PZA, EMB                | ALT > 2 × ULN                 | 7                          |
| Ben Mahmoud, 2012 <sup>51</sup>     | <i>NAT2</i>      | Cohort       | Tunisian  | 14/52                      | 42.4/42.1                               | 42.8/48.1               | INH, RIF containing regimen       | ALT > 2 × ULN                 | 7                          |
| Bozok Cetintas, 2008 <sup>52</sup>  | <i>NAT2</i>      | Case-control | Turkish   | 30/70                      | 39.8/37.3                               | 50.0/72.8               | INH, RIF, PZA, EMB                | ALT > 3 × ULN                 | 6                          |
| Higuchi, 2007 <sup>53</sup>         | <i>NAT2</i>      | Cohort       | Japanese  | 18/82                      | 60.8/64.7                               | 50.0/57.3               | INH, RIF containing regimen       | ALT > 2 × ULN                 | 7                          |
| Ho, 2013 <sup>54</sup>              | <i>NAT2</i>      | Cohort       | Taiwanese | 20/328                     | NA/NA                                   | NA/NA                   | INH, RIF, PZA, EMB                | ALT > 5 × ULN                 | 6                          |
| Huang, 2002 <sup>55</sup>           | <i>NAT2</i>      | Cohort       | Taiwanese | 33/191                     | 73.3/63.7                               | 87.9/88.5               | INH, RIF, PZA, EMB                | ALT > 2 × ULN                 | 7                          |
| Khalili, 2011 <sup>56</sup>         | <i>NAT2</i>      | Case-control | Iranian   | 14/36                      | NA/NA                                   | NA/NA                   | INH, RIF, PZA, EMB                | ALT > 3 × ULN                 | 6                          |
| Leiro-Fernandez, 2011 <sup>57</sup> | <i>NAT2</i>      | Case-control | Caucasian | 50/67                      | 34.0/30.5 <sup>b</sup>                  | 54.0/56.7               | INH, RIF, PZA                     | ALT > 3 × ULN                 | 7                          |
| Ly, 2012 <sup>24</sup>              | <i>NAT2</i>      | Case-        | Chinese   | 89/356                     | 42.0/42.0 <sup>b</sup>                  | 73.0/73.0               | INH, RIF, PZA,                    | ALT > 2 × ULN                 | 7                          |

|                                      |                     |              |            |        |                        |           |                        |                 |   |
|--------------------------------------|---------------------|--------------|------------|--------|------------------------|-----------|------------------------|-----------------|---|
|                                      |                     | control      |            |        |                        |           | EMB                    |                 |   |
| Ng, 2014 <sup>58</sup>               | <i>NAT2</i>         | Case-control | Mixed      | 26/101 | 48.3/NA                | 38.5/NA   | INH containing regimen | ALT > 5 × ULN   | 7 |
| Ohno, 2000 <sup>59</sup>             | <i>NAT2</i>         | Cohort       | Japanese   | 14/63  | NA/NA                  | NA/NA     | INH, RIF               | ALT > 1.5 × ULN | 7 |
| Possuelo, 2008 <sup>60</sup>         | <i>NAT2</i>         | Cohort       | Brazilian  | 14/240 | 38.9/36.5              | 50.0/66.9 | INH, RIF, PZA          | ALT > 3 × ULN   | 7 |
| Rana, 2012 <sup>61</sup>             | <i>NAT2</i>         | Cohort       | Indian     | 50/201 | 45.3/43.8              | 76.0/57.2 | INH, RIF, PZA, EMB     | ALT > 5 × ULN   | 7 |
| Shimizu, 2006 <sup>62</sup>          | <i>NAT2</i>         | Case-control | Japanese   | 10/32  | 60.5/64.9              | 70.0/46.9 | INH, RIF               | ALT > 2 × ULN   | 6 |
| Yuliwulandari, 2016 <sup>63</sup>    | <i>NAT2</i>         | Case-control | Indonesian | 50/191 | NA/NA                  | NA/NA     | NA                     | ALT > 2 × ULN   | 7 |
| Wattanapokayakit, 2016 <sup>25</sup> | <i>NAT2</i>         | Case-control | Thai       | 53/85  | 51.4/50.2              | 58.5/60.0 | INH containing regimen | ALT > 2 × ULN   | 7 |
| Chatterjee, 2010 <sup>64</sup>       | <i>GSTMI, GSTTI</i> | Case-control | Indian     | 51/100 | 37.2/33.2              | 49.0/63.0 | INH, RIF, PZA          | ALT > 3 × ULN   | 7 |
| Gupta, 2013 <sup>65</sup>            | <i>GSTMI, GSTTI</i> | Cohort       | Indian     | 50/246 | 37.0/36.5 <sup>b</sup> | 48.0/56.5 | INH, RIF, PZA, EMB     | ALT > 2 × ULN   | 7 |
| Huang, 2007 <sup>66</sup>            | <i>GSTMI, GSTTI</i> | Case-control | Taiwanese  | 63/63  | 62.0/NA                | NA/NA     | NA                     | ALT > 5 × ULN   | 6 |
| Kim, 2010 <sup>67</sup>              | <i>GSTMI, GSTTI</i> | Case-control | Korean     | 57/190 | 47.3/42.4              | 59.6/67.9 | INH, RIF, PZA, EMB     | ALT > 3 × ULN   | 7 |
| Leiro, 2008 <sup>68</sup>            | <i>GSTMI, GSTTI</i> | Case-control | Caucasian  | 35/60  | 34.0/31.0 <sup>b</sup> | 40.0/41.7 | INH, RIF, PZA          | ALT > 3 × ULN   | 7 |
| Liu, 2014 <sup>69</sup>              | <i>GSTMI, GSTTI</i> | Case-control | Chinese    | 20/143 | 35.9/61.2              | 60.0/59.4 | INH containing regimen | ALT > 2 × ULN   | 7 |
| Monteiro, 2012 <sup>70</sup>         | <i>GSTMI, GSTTI</i> | Cohort       | Brazilian  | 59/118 | 37.0/38.0 <sup>b</sup> | 76.0/61.0 | NA                     | ALT > 2 × ULN   | 7 |

|                              |                     |              |                        |         |                        |           |                    |               |   |
|------------------------------|---------------------|--------------|------------------------|---------|------------------------|-----------|--------------------|---------------|---|
| Rana, 2013 <sup>71</sup>     | <i>GSTM1, GSTT1</i> | Cohort       | Indian                 | 30/220  | 43.6/42.3              | 60.0/64.5 | INH, RIF           | ALT > 5 × ULN | 6 |
| Roy, 2001 <sup>72</sup>      | <i>GSTM1, GSTT1</i> | Case-control | Indian                 | 33/33   | NA/NA                  | NA/NA     | INH, RIF, PZA, EMB | ALT > 2 × ULN | 7 |
| Chen, 2015 <sup>42</sup>     | <i>SLCO1B1</i>      | Case-control | Chinese                | 89/356  | 43.7/43.6              | 73.0/73.0 | INH, RIF, PZA, EMB | ALT > 2 × ULN | 7 |
| Kim, 2012 <sup>10</sup>      | <i>SLCO1B1</i>      | Case-control | Korean                 | 67/159  | 43.0/42.8              | 65.7/65.4 | INH, RIF, PZA, EMB | ALT > 2 × ULN | 7 |
| Li, 2012 <sup>28</sup>       | <i>SLCO1B1</i>      | Case-control | Chinese                | 118/155 | 40.5/39.3              | 48.3/54.8 | RIF                | ALT > 3 × ULN | 7 |
| An, 2012 <sup>73</sup>       | <i>NAT2, CYP2E1</i> | Case-control | Chinese                | 101/107 | 36.0/33.4 <sup>b</sup> | 55.0/70.0 | INH, RIF, PZA, EMB | ALT > 2 × ULN | 7 |
| Bose, 2011 <sup>74</sup>     | <i>NAT2, CYP2E1</i> | Cohort       | Indian                 | 41/177  | 38.0/36.0              | 43.9/47.4 | INH, RIF, PZA, EMB | ALT > 2 × ULN | 7 |
| Chamorro, 2013 <sup>75</sup> | <i>NAT2, CYP2E1</i> | Cohort       | Mixed (South American) | 47/128  | 29.0/27.0              | 41.3/64.8 | INH, RIF, PZA, EMB | ALT > 3 × ULN | 7 |
| Cho, 2007 <sup>76</sup>      | <i>NAT2, CYP2E1</i> | Cohort       | Korean                 | 18/114  | 51.2/46.7              | 66.7/55.3 | INH, RIF, PZA, EMB | ALT > 2 × ULN | 7 |
| Gupta, 2013 <sup>27</sup>    | <i>NAT2, CYP2E1</i> | Case-control | Indian                 | 50/165  | 37.0/38.0              | 48.0/60.0 | INH, RIF, PZA, EMB | ALT > 2 × ULN | 7 |
| Huang, 2003 <sup>77</sup>    | <i>NAT2, CYP2E1</i> | Cohort       | Taiwanese              | 49/269  | 70.0/59.0 <sup>b</sup> | 18.4/14.9 | INH, RIF, PZA, EMB | ALT > 2 × ULN | 7 |
| Lee, 2010 <sup>78</sup>      | <i>NAT2, CYP2E1</i> | Cohort       | Taiwanese              | 45/95   | 58.4/54.9              | 60.0/66.3 | INH, RIF, PZA, EMB | ALT > 2 × ULN | 7 |
| Mishra, 2013 <sup>79</sup>   | <i>NAT2, CYP2E1</i> | Case-control | Indian                 | 33/173  | 38.0/NA                | 52.0/NA   | INH, RIF, PZA, EMB | ALT > 3 × ULN | 7 |
| Santos, 2013 <sup>80</sup>   | <i>NAT2,</i>        | Case-        | Brazilian              | 18/252  | 47.7/45.6              | 56.0/49.0 | INH, RIF           | ALT > 3 × ULN | 7 |



|                                        |                                   |              |           |         |                                                      |           |                         |                      |   |
|----------------------------------------|-----------------------------------|--------------|-----------|---------|------------------------------------------------------|-----------|-------------------------|----------------------|---|
|                                        | <i>CYP2E1</i>                     | control      |           |         |                                                      |           |                         |                      |   |
| Vuilleumier, 2006 <sup>81</sup>        | <i>NAT2, CYP2E1</i>               | Case-control | Mixed     | 8/63    | 27-35: 2/22 <sup>c</sup><br>>36 : 5/18 <sup>c</sup>  | 38.0/51.0 | INH                     | AST or ALT > 4 × ULN | 7 |
| Yamada, 2009 <sup>82</sup>             | <i>NAT2, CYP2E1</i>               | Case-control | Mixed     | 23/147  | NA/NA                                                | 13.0/42.9 | INH                     | ALT > 2 × ULN        | 7 |
| Zaverucha-do-Valle, 2014 <sup>83</sup> | <i>NAT2, CYP2E1</i>               | Cohort       | Brazilian | 50/79   | < 40: 28/43 <sup>c</sup><br>> 40: 20/36 <sup>c</sup> | 60.4/72.2 | INH, RIF, PZA           | ALT > 2 × ULN        | 6 |
| Sharma, 2014 <sup>84</sup>             | <i>CYP2E1, GSTM1</i>              | Cohort       | Indian    | 105/185 | 35.2/27.6                                            | 55.7/72.1 | INH, RIF, PZA, EMB      | ALT > 5 × ULN        | 7 |
| Wang, 2010 <sup>85</sup>               | <i>CYP2E1, GSTM1</i>              | Case-control | Chinese   | 104/111 | 48.6/44.7                                            | 67.3/67.6 | INH, RIF, PZA, EMB      | ALT > 2 × ULN        | 7 |
| Tang, 2012 <sup>86</sup>               | <i>CYP2E1, GSTM1, GSTT1</i>       | Case-control | Chinese   | 89/356  | 43.7/43.6                                            | 73.0/73.0 | INH, RIF, PZA, EMB      | ALT > 2 × ULN        | 7 |
| Yimer, 2011 <sup>45</sup>              | <i>NAT2, SLCO1B1</i>              | Cohort       | Ethiopian | 41/160  | NA/NA                                                | NA/NA     | INH, RIF, PZA, EMB      | ALT > 2 × ULN        | 6 |
| Brito, 2014 <sup>87</sup>              | <i>NAT2, CYP2E1, GSTM1, GSTT1</i> | Cohort       | Brazilian | 15/230  | 38.1/36.8                                            | 46.7/NA   | INH, RIF, PZA           | ALT > 3 × ULN        | 7 |
| Forestiero, 2013 <sup>88</sup>         | <i>NAT2, CYP2E1, GSTM1, GSTT1</i> | Cohort       | Brazilian | 59/40   | NA/NA                                                | 49.2/60.0 | INH, RIF, PZA           | ALT > 2.5 × ULN      | 6 |
| Rana, 2014 <sup>89</sup>               | <i>NAT2, CYP2E1, GSTM1, GSTT1</i> | Cohort       | Indian    | 55/245  | 43.6/42.3                                            | 60.0/62.0 | INH, RIF, PZA, EMB      | ALT > 5 × ULN        | 6 |
| Singla, 2014 <sup>26</sup>             | <i>NAT2, CYP2E1, GSTM1,</i>       | Case-control | Indian    | 17/391  | 48.2/32.7                                            | 64.7/61.4 | INH, RIF, PZA, EMB, STM | ALT > 2 × ULN        | 7 |

|                              |                                                                    |              |           |         |           |           |                              |               |   |
|------------------------------|--------------------------------------------------------------------|--------------|-----------|---------|-----------|-----------|------------------------------|---------------|---|
|                              | <i>GSTT1</i>                                                       |              |           |         |           |           |                              |               |   |
| Sotsuka, 2011 <sup>90</sup>  | <i>NAT2</i> ,<br><i>CYP2E1</i> ,<br><i>GSTM1</i> ,<br><i>GSTT1</i> | Case-control | Japanese  | 20/92   | 54.9/50.4 | 90.0/73.9 | INH, RIF, PZA,<br>EMB or STM | ALT > 3 × ULN | 7 |
| Teixeira, 2011 <sup>91</sup> | <i>NAT2</i> ,<br><i>CYP2E1</i> ,<br><i>GSTM1</i> ,<br><i>GSTT1</i> | Case-control | Brazilian | 26/141  | 47.6/43.0 | 61.5/52.5 | INH containing regimen       | ALT > 3 × ULN | 7 |
| Xiang, 2014 <sup>92</sup>    | <i>NAT2</i> ,<br><i>CYP2E1</i> ,<br><i>GSTM1</i> ,<br><i>GSTT1</i> | Cohort       | Chinese   | 89/2155 | 37.0/44.5 | 67.4/55.7 | INH, RIF, PZA,<br>EMB        | ALT > 2 × ULN | 7 |

Abbreviations: **ALT**, alanine aminotransferase; **AST**, aspartate aminotransferase; **ATDILI**, anti-tuberculosis drug-induced liver injury; **CYP2E1**, cytochrome P450 2E1; **EMB**, ethambutol; **GSTM1**, glutathione S-transferase Mu 1; **GSTT1**, glutathione S-transferase Theta 1; **INH**, isoniazid; **NA**, not available; **NAT2**, N-acetyltransferase 2; **PZA**, pyrazinamide; **RIF**, rifampicin; **SLCO1B1**, solute carrier organic anion transporter family, member 1B1 (encoding organic anion transporting polypeptide 1B1 [OATP1B1]); **STM**, streptomycin; **TB**, tuberculosis; **ULN**, upper limit of normal

<sup>a</sup> Mean unless otherwise stated

<sup>b</sup> Median age

<sup>c</sup> Number of individuals in the age ranges

<sup>d</sup> Detailed scoring for each quality assessment criterion based on the revised Little's recommendation in supplementary data S2 Table.

1  
2  
3  
4  
5  
6  
7  
8  
9  
10  
11  
12  
13  
14  
15  
16  
17  
18  
19  
20  
21  
22  
23  
24  
25  
26  
27  
28  
29  
30  
31  
32  
33  
34  
35  
36  
37  
38  
39  
40  
41  
42  
43  
44  
45  
46  
47

**Table 2. Association between the *SLCO1B1* polymorphisms and the risk of anti-tuberculosis drug-induced liver injury**

| Polymorphism                      | Genetic model                  | Number of studies | OR (95% CI)       | P value | I <sup>2</sup> , % | P <sub>heterogeneity</sub> | Model of meta-analysis |
|-----------------------------------|--------------------------------|-------------------|-------------------|---------|--------------------|----------------------------|------------------------|
| <i>SLCO1B1</i> 388A>G (rs2306283) | dominant model AA + AG vs. GG  | 4                 | 1.00 [0.76, 1.31] | 1.00    | 0                  | 0.73                       | Fixed                  |
|                                   | recessive model AA vs. AG + GG | 4                 | 1.45 [0.93, 2.25] | 0.10    | 0                  | 0.84                       | Fixed                  |
|                                   | additive model AA vs. GG       | 4                 | 1.36 [0.85, 2.15] | 0.20    | 0                  | 0.98                       | Fixed                  |
| <i>SLCO1B1</i> 521T>C (rs4149056) | dominant model CC + TC vs. TT  | 4                 | 0.74 [0.43, 1.28] | 0.28    | 66                 | 0.03                       | Random                 |
|                                   | recessive model CC vs. TC + TT | 4                 | 1.21 [0.40, 3.64] | 0.73    | 0                  | 0.57                       | Fixed                  |
|                                   | additive model CC vs. TT       | 4                 | 1.27 [0.42, 3.84] | 0.67    | 0                  | 0.61                       | Fixed                  |

Abbreviations: **OR**, odds ratio; **CI**, confidence interval

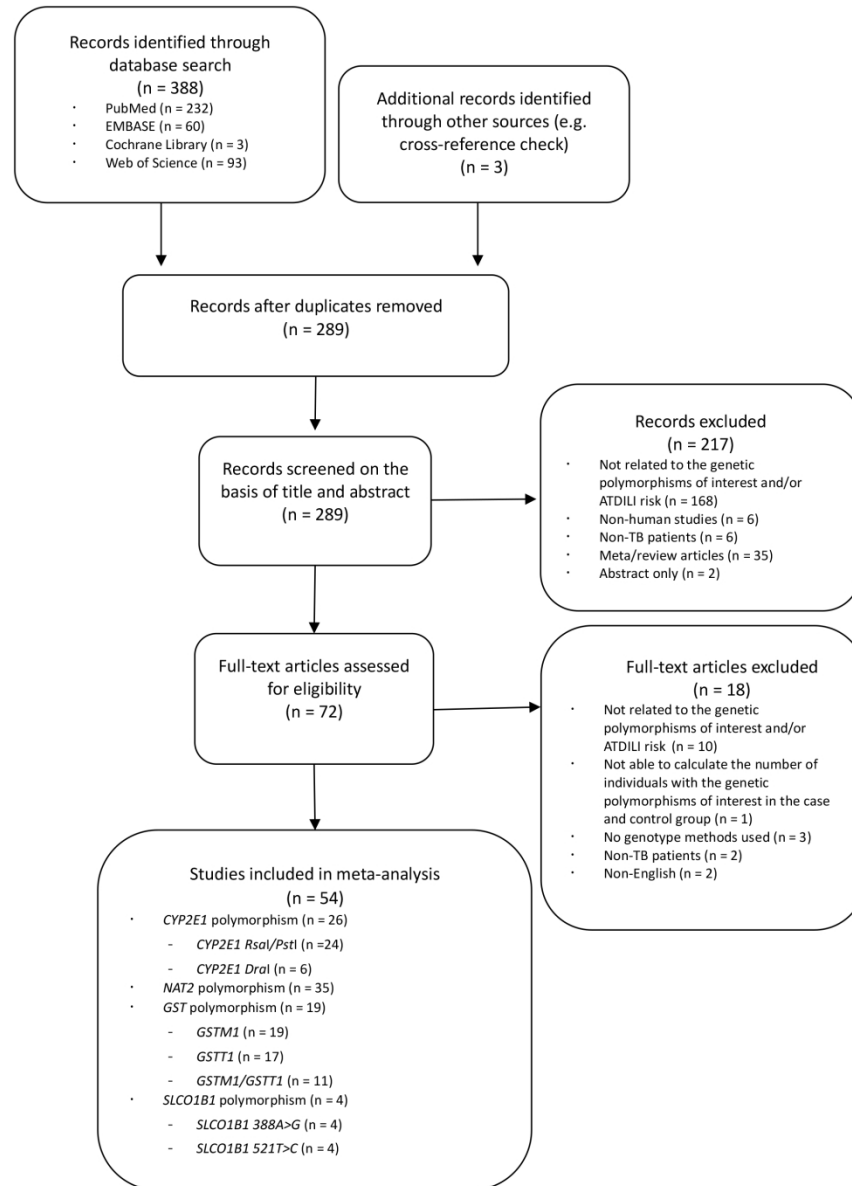

Study selection process flowchart.

(A) *CYP2E1* RsaI/PstI c1/c1 genotype compared to c1/c2 + c2/c2 genotypes(B) *CYP2E1* DraI D/D genotype compared to D/C + C/C genotypes.

Risk of anti-tuberculosis drug-induced liver injury in patients with the *CYP2E1* (A) RsaI/PstI c1/c1 genotype compared to c1/c2 + c2/c2 genotypes and (B) DraI D/D genotype compared to D/C + C/C genotypes.



Risk of anti-tuberculosis drug-induced liver injury in patients with the NAT2 slow acetylator genotype compared to those with the intermediate/fast acetylator genotypes.

(A) *GSTM1* null genotype compared to the non-null genotype(B) *GSTT1* null genotype compared to the non-null genotype(C) *GSTM1/GSTT1* dual-null genotype compared to the one- and non-null genotypes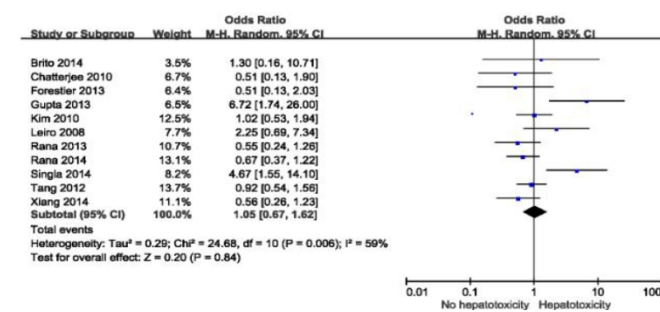

Risk of anti-tuberculosis drug-induced liver injury in patients with (A) the *GSTM1* null genotype compared to the non-null genotype, (B) the *GSTT1* null genotype compared to the non-null genotype, and (C) the *GSTM1/GSTT1* dual-null genotype compared to the one- and non-null genotypes.

## Supplementary data

### S1 Table. Completed MOOSE (Meta-analysis Of Observational Studies in Epidemiology) checklist

| Item No                                     | Recommendation                                                                                                                                                                                                                                                               | Reported on Page No   |
|---------------------------------------------|------------------------------------------------------------------------------------------------------------------------------------------------------------------------------------------------------------------------------------------------------------------------------|-----------------------|
| Reporting of background should include      |                                                                                                                                                                                                                                                                              |                       |
| 1                                           | Problem definition                                                                                                                                                                                                                                                           | 5-6                   |
| 2                                           | Hypothesis statement (Objectives)                                                                                                                                                                                                                                            | 6                     |
| 3                                           | Description of study outcome(s)                                                                                                                                                                                                                                              | 6                     |
| 4                                           | Type of exposure or intervention used                                                                                                                                                                                                                                        | NA                    |
| 5                                           | Type of study designs used                                                                                                                                                                                                                                                   | 7                     |
| 6                                           | Study population                                                                                                                                                                                                                                                             | 7                     |
| Reporting of search strategy should include |                                                                                                                                                                                                                                                                              |                       |
| 7                                           | Qualifications of searchers (eg, librarians and investigators)                                                                                                                                                                                                               | NA                    |
| 8                                           | Search strategy, including time period included in the synthesis and key words                                                                                                                                                                                               | 7<br>S2 Table         |
| 9                                           | Effort to include all available studies, including contact with authors                                                                                                                                                                                                      | 7                     |
| 10                                          | Databases and registries searched                                                                                                                                                                                                                                            | 7                     |
| 11                                          | Search software used, name and version, including special features used (eg, explosion)                                                                                                                                                                                      | 7                     |
| 12                                          | Use of hand searching (eg, reference lists of obtained articles)                                                                                                                                                                                                             | 7                     |
| 13                                          | List of citations located and those excluded, including justification                                                                                                                                                                                                        | Fig 1                 |
| 14                                          | Method of addressing articles published in languages other than English                                                                                                                                                                                                      | 7                     |
| 15                                          | Method of handling abstracts and unpublished studies                                                                                                                                                                                                                         | 7, Fig 1              |
| 16                                          | Description of any contact with authors                                                                                                                                                                                                                                      | -                     |
| Reporting of methods should include         |                                                                                                                                                                                                                                                                              |                       |
| 17                                          | Description of relevance or appropriateness of studies assembled for assessing the hypothesis to be tested                                                                                                                                                                   | NA                    |
| 18                                          | Rationale for the selection and coding of data (eg, sound clinical principles or convenience)                                                                                                                                                                                | 7                     |
| 19                                          | Documentation of how data were classified and coded (eg, multiple raters, blinding and interrater reliability)                                                                                                                                                               | 6                     |
| 20                                          | Assessment of confounding (eg, comparability of cases and controls in studies where appropriate)                                                                                                                                                                             | NA                    |
| 21                                          | Assessment of study quality, including blinding of quality assessors, stratification or regression on possible predictors of study results                                                                                                                                   | Table 1,<br>S3 Table  |
| 22                                          | Assessment of heterogeneity                                                                                                                                                                                                                                                  | 9                     |
| 23                                          | Description of statistical methods (eg, complete description of fixed or random effects models, justification of whether the chosen models account for predictors of study results, dose-response models, or cumulative meta-analysis) in sufficient detail to be replicated | 8-9                   |
| 24                                          | Provision of appropriate tables and graphics                                                                                                                                                                                                                                 | Table 1-2,<br>Fig 1-4 |



| Reporting of results should include |                                                                     |                          |
|-------------------------------------|---------------------------------------------------------------------|--------------------------|
| 25                                  | Graphic summarizing individual study estimates and overall estimate | Fig 2-4                  |
| 26                                  | Table giving descriptive information for each study included        | Table 1                  |
| 27                                  | Results of sensitivity testing (eg, subgroup analysis)              | 13-14,<br>S9-11<br>Table |
| 28                                  | Indication of statistical uncertainty of findings                   | -                        |

For peer review only

S2 Table. Search strategies

| Electronic database | Search strategies                                                                                                                                                                                                                                                                                                                                                                                                                                                                                                                                                                                                                                                                                                                                                                                             |
|---------------------|---------------------------------------------------------------------------------------------------------------------------------------------------------------------------------------------------------------------------------------------------------------------------------------------------------------------------------------------------------------------------------------------------------------------------------------------------------------------------------------------------------------------------------------------------------------------------------------------------------------------------------------------------------------------------------------------------------------------------------------------------------------------------------------------------------------|
| PubMed              | ((((((((("glutathione S transferase") OR GST)) OR ("glutathione S-transferase T1" [Supplementary Concept] OR "glutathione S-transferase M1" [Supplementary Concept])) AND Humans[Mesh] AND English[lang])) OR (((("SLCO1B1 protein, human" [Supplementary Concept] OR "solute carrier organic anion transporter") AND Humans[Mesh] AND English[lang])) OR ("isoniazid acetyltransferase" [Supplementary Concept] OR "ArylamineN-Acetyltransferase"[Mesh] OR "NAT2 protein, human" [Supplementary Concept])) OR "Cytochrome P-450 CYP2E1"[Mesh] OR drug metaboli#er*) OR "Genetic Predisposition to Disease"[Mesh] AND (("Drug-Induced Liver Injury"[Mesh] OR "Drug-Induced Liver Injury, Chronic"[Mesh]))) AND (((("AntitubercularAgents"[Mesh]) OR tuberculosis OR antituberculo*)) Filters: Humans; English |
| EMBASE              | 'solute carrier organic anion transporter 1b1'/expOR 'solute carrier organic anion transporter 1b1' OR 'multidrug resistance protein 1'/expOR 'multidrug resistance protein 1' OR 'organic anion transporter'/expOR 'organic anion transporter' AND [humans]/limAND [english]/limOR slco1b1 OR 'drug transporter gene*' OR abcb1 AND ('hepatitis'/expOR hepatitis OR 'liver toxicity'/expOR ('drug induced' AND ('liver'/expOR liver) AND ('toxicity'/expOR toxicity)) OR 'toxic hepatitis'/expOR 'hepatotoxicity'/expOR hepatotoxicity) AND ('tuberculostaticagent'/expOR 'tuberculostaticagent' OR antituberculosisOR 'isoni*' OR 'rifampi*') AND [humans]/limAND [english]/lim                                                                                                                             |
| Web of Science      | ((((("Glutathione S transferase") OR GST) OR GSTT1) OR GSTM1) OR (((NAT2) OR "arylamineN acetyltransferase") OR N acetyltransferase*) OR ((drug metaboli#er*) OR (drug metaboli#ingenzyme*)) OR ("Cytochrome 2E1") OR "CYP 2E1") OR ("The solute carrier organic anion transporter family member 1B1") OR SLCO1B1) OR (genotyp* OR acetylator*) OR (gene* susceptibilit*) OR (*polymorphism*) AND ((drug NEAR/3 liver) OR (hepatotoxi*) OR (drug induced liver injury) OR (hepatitis)) AND ((rifampi*) OR (isoni*) OR (antituberculosis) OR ("antitubercul* agent*"))                                                                                                                                                                                                                                         |
| Cochrane Reviews    | [AntitubercularAgents] explode all trees AND [Drug-Induced Liver Injury] explode all trees AND ([Cytochrome P-450 CYP2E1] explode all trees OR nat2 OR "N acetyltrasferase" "glutathione S transferase" OR GST OR GSTM1 OR GSTT1 "Solute carrier organic anion transporter" OR SLCO1B1)(Limitation : Trials)                                                                                                                                                                                                                                                                                                                                                                                                                                                                                                  |

**S3 Table. Study quality assessment**

| Studies                              | Scientific design | Definite inclusion of study population <sup>a</sup> | Explicit information on study population <sup>a</sup> | Explicit diagnostic criteria on ATDILI <sup>a</sup> | Genetic detection method <sup>a</sup> | Correct statistical analysis <sup>a</sup> | Logical discussion of study bias <sup>a</sup> |
|--------------------------------------|-------------------|-----------------------------------------------------|-------------------------------------------------------|-----------------------------------------------------|---------------------------------------|-------------------------------------------|-----------------------------------------------|
| Feng, 2014 <sup>1</sup>              | 1                 | 1                                                   | 1                                                     | 1                                                   | 1                                     | 1                                         | 0                                             |
| Kim, 2009 <sup>2</sup>               | 1                 | 1                                                   | 1                                                     | 1                                                   | 1                                     | 1                                         | 1                                             |
| Singh, 2014 <sup>3</sup>             | 1                 | 1                                                   | 1                                                     | 1                                                   | 1                                     | 1                                         | 1                                             |
| Tang, 2013 <sup>4</sup>              | 1                 | 1                                                   | 1                                                     | 1                                                   | 1                                     | 1                                         | 1                                             |
| Ben Mahmoud, 2012 <sup>5</sup>       | 1                 | 1                                                   | 1                                                     | 1                                                   | 1                                     | 1                                         | 1                                             |
| Bozok Cetintas, 2008 <sup>6</sup>    | 1                 | 1                                                   | 1                                                     | 1                                                   | 1                                     | 0                                         | 1                                             |
| Higuchi, 2007 <sup>7</sup>           | 1                 | 1                                                   | 1                                                     | 1                                                   | 1                                     | 1                                         | 1                                             |
| Ho, 2013 <sup>8</sup>                | 1                 | 1                                                   | 1                                                     | 1                                                   | 1                                     | 1                                         | 0                                             |
| Huang, 2002 <sup>9</sup>             | 1                 | 1                                                   | 1                                                     | 1                                                   | 1                                     | 1                                         | 1                                             |
| Khalili, 2011 <sup>10</sup>          | 1                 | 1                                                   | 1                                                     | 1                                                   | 1                                     | 1                                         | 0                                             |
| Leiro-Fernandez, 2011 <sup>11</sup>  | 1                 | 1                                                   | 1                                                     | 1                                                   | 1                                     | 1                                         | 1                                             |
| Lv, 2012 <sup>12</sup>               | 1                 | 1                                                   | 1                                                     | 1                                                   | 1                                     | 1                                         | 1                                             |
| Ng, 2014 <sup>13</sup>               | 1                 | 1                                                   | 1                                                     | 1                                                   | 1                                     | 1                                         | 1                                             |
| Ohno, 2000 <sup>14</sup>             | 1                 | 1                                                   | 1                                                     | 1                                                   | 1                                     | 1                                         | 1                                             |
| Possuelo, 2008 <sup>15</sup>         | 1                 | 1                                                   | 1                                                     | 1                                                   | 1                                     | 1                                         | 1                                             |
| Rana, 2012 <sup>16</sup>             | 1                 | 1                                                   | 1                                                     | 1                                                   | 1                                     | 1                                         | 1                                             |
| Shimizu, 2006 <sup>17</sup>          | 1                 | 1                                                   | 1                                                     | 1                                                   | 1                                     | 1                                         | 0                                             |
| Yuliwulandari, 2016 <sup>18</sup>    | 1                 | 1                                                   | 1                                                     | 1                                                   | 1                                     | 1                                         | 1                                             |
| Wattanapokayakit, 2016 <sup>19</sup> | 1                 | 1                                                   | 1                                                     | 1                                                   | 1                                     | 1                                         | 1                                             |
| Chatterjee, 2010 <sup>20</sup>       | 1                 | 1                                                   | 1                                                     | 1                                                   | 1                                     | 1                                         | 1                                             |
| Gupta, 2013 <sup>21</sup>            | 1                 | 1                                                   | 1                                                     | 1                                                   | 1                                     | 1                                         | 1                                             |
| Huang, 2007 <sup>22</sup>            | 1                 | 1                                                   | 1                                                     | 1                                                   | 1                                     | 1                                         | 0                                             |
| Kim, 2010 <sup>23</sup>              | 1                 | 1                                                   | 1                                                     | 1                                                   | 1                                     | 1                                         | 1                                             |
| Leiro, 2008 <sup>24</sup>            | 1                 | 1                                                   | 1                                                     | 1                                                   | 1                                     | 1                                         | 1                                             |
| Liu, 2014 <sup>25</sup>              | 1                 | 1                                                   | 1                                                     | 1                                                   | 1                                     | 1                                         | 1                                             |
| Monteiro, 2012 <sup>26</sup>         | 1                 | 1                                                   | 1                                                     | 1                                                   | 1                                     | 1                                         | 1                                             |
| Rana, 2013 <sup>27</sup>             | 1                 | 1                                                   | 1                                                     | 1                                                   | 1                                     | 1                                         | 0                                             |
| Roy, 2001 <sup>28</sup>              | 1                 | 1                                                   | 1                                                     | 1                                                   | 1                                     | 1                                         | 1                                             |
| Chen, 2015 <sup>29</sup>             | 1                 | 1                                                   | 1                                                     | 1                                                   | 1                                     | 1                                         | 1                                             |
| Kim, 2012 <sup>30</sup>              | 1                 | 1                                                   | 1                                                     | 1                                                   | 1                                     | 1                                         | 1                                             |
| Li, 2012 <sup>31</sup>               | 1                 | 1                                                   | 1                                                     | 1                                                   | 1                                     | 1                                         | 1                                             |
| An, 2012 <sup>32</sup>               | 1                 | 1                                                   | 1                                                     | 1                                                   | 1                                     | 1                                         | 1                                             |
| Bose, 2011 <sup>33</sup>             | 1                 | 1                                                   | 1                                                     | 1                                                   | 1                                     | 1                                         | 1                                             |

|                                        |   |   |   |   |   |   |   |
|----------------------------------------|---|---|---|---|---|---|---|
| Chamorro, 2013 <sup>34</sup>           | 1 | 1 | 1 | 1 | 1 | 1 | 1 |
| Cho, 2007 <sup>35</sup>                | 1 | 1 | 1 | 1 | 1 | 1 | 1 |
| Gupta, 2013 <sup>36</sup>              | 1 | 1 | 1 | 1 | 1 | 1 | 1 |
| Huang, 2003 <sup>37</sup>              | 1 | 1 | 1 | 1 | 1 | 1 | 1 |
| Lee, 2010 <sup>38</sup>                | 1 | 1 | 1 | 1 | 1 | 1 | 1 |
| Mishra, 2013 <sup>39</sup>             | 1 | 1 | 1 | 1 | 1 | 1 | 1 |
| Santos, 2013 <sup>40</sup>             | 1 | 1 | 1 | 1 | 1 | 1 | 1 |
| Vuilleumier, 2006 <sup>41</sup>        | 1 | 1 | 1 | 1 | 1 | 1 | 1 |
| Yamada, 2009 <sup>42</sup>             | 1 | 1 | 1 | 1 | 1 | 1 | 1 |
| Zaverucha-do-Valle, 2014 <sup>43</sup> | 1 | 1 | 1 | 1 | 1 | 1 | 0 |
| Sharma, 2014 <sup>44</sup>             | 1 | 1 | 1 | 1 | 1 | 1 | 1 |
| Wang, 2010 <sup>45</sup>               | 1 | 1 | 1 | 1 | 1 | 1 | 1 |
| Tang, 2012 <sup>46</sup>               | 1 | 1 | 1 | 1 | 1 | 1 | 1 |
| Yimer, 2011 <sup>47</sup>              | 1 | 1 | 1 | 1 | 1 | 1 | 0 |
| Brito, 2014 <sup>48</sup>              | 1 | 1 | 1 | 1 | 1 | 1 | 1 |
| Forestiero, 2013 <sup>49</sup>         | 1 | 1 | 1 | 1 | 1 | 1 | 0 |
| Rana, 2014 <sup>50</sup>               | 1 | 1 | 1 | 1 | 1 | 1 | 0 |
| Singla, 2014 <sup>51</sup>             | 1 | 1 | 1 | 1 | 1 | 1 | 1 |
| Sotsuka, 2011 <sup>52</sup>            | 1 | 1 | 1 | 1 | 1 | 1 | 1 |
| Teixeira, 2011 <sup>53</sup>           | 1 | 1 | 1 | 1 | 1 | 1 | 1 |
| Xiang, 2014 <sup>54</sup>              | 1 | 1 | 1 | 1 | 1 | 1 | 1 |

Abbreviation: ATDILI, anti-tuberculosis drug-induced liver injury

<sup>a</sup> 0 indicates 'not mentioned' in the study; 1 indicates 'sufficient information provided' in the study

**S4 Table. Genotype distribution and the genotyping method used for the CYP2E1 genetic polymorphisms in the included studies (n = 26)**

| Study                    | <i>RsaI/PstI</i> genotype (n = 24) |               |                                     |               | <i>DraI</i> genotype (n = 6)     |           |                                     |            | Genotyping method |
|--------------------------|------------------------------------|---------------|-------------------------------------|---------------|----------------------------------|-----------|-------------------------------------|------------|-------------------|
|                          | Case (number of individuals [%])   |               | Control (number of individuals [%]) |               | Case (number of individuals [%]) |           | Control (number of individuals [%]) |            |                   |
|                          | C1/C1                              | C1/C2 + C2/C2 | C1/C1                               | C1/C2 + C2/C2 | D/D                              | D/C + C/C | D/D                                 | D/C + C/C  |                   |
| An <sup>32</sup>         | 72 (71.3)                          | 29 (28.7)     | 64 (59.8)                           | 43 (40.2)     | NA                               | NA        | NA                                  | NA         | Sequencing        |
| Bose <sup>33</sup>       | NA                                 | NA            | NA                                  | NA            | 4 (9.8)                          | 37 (90.2) | 32 (18.1)                           | 145 (81.9) | PCR-RFLP          |
| Brito <sup>48</sup>      | 13 (86.7)                          | 2 (13.3)      | 195 (84.8)                          | 35 (15.2)     | 12 (80.0)                        | 3 (20.0)  | 179 (76.8)                          | 54 (23.2)  | PCR-RFLP          |
| Chamorro <sup>34</sup>   | 30 (63.8)                          | 17 (36.2)     | 83 (64.8)                           | 45 (35.2)     | NA                               | NA        | NA                                  | NA         | PCR-RFLP          |
| Cho <sup>35</sup>        | 10 (55.6)                          | 8 (44.4)      | 65 (57.0)                           | 49 (43.0)     | NA                               | NA        | NA                                  | NA         | Sequencing        |
| Feng <sup>1</sup>        | 142 (82.1)                         | 31 (17.9)     | 90 (52.0)                           | 83 (48.0)     | NA                               | NA        | NA                                  | NA         | Sequencing        |
| Forestiero <sup>49</sup> | 53 (89.8)                          | 6 (10.2)      | 30 (75.0)                           | 10 (25.0)     | NA                               | NA        | NA                                  | NA         | PCR-RFLP          |
| Gupta <sup>36</sup>      | 49 (98.0)                          | 1 (2.0)       | 156 (94.5)                          | 9 (5.5)       | 33 (66.0)                        | 17 (34.0) | 107 (64.9)                          | 58 (35.1)  | PCR-RFLP          |
| Huang <sup>37</sup>      | 37 (75.5)                          | 12 (24.5)     | 148 (55.0)                          | 121 (45.0)    | NA                               | NA        | NA                                  | NA         | PCR-RFLP          |

|    |                           |           |           |            |            |           |           |            |            |            |
|----|---------------------------|-----------|-----------|------------|------------|-----------|-----------|------------|------------|------------|
| 1  |                           |           |           |            |            |           |           |            |            |            |
| 2  |                           |           |           |            |            |           |           |            |            |            |
| 3  | Kim <sup>2</sup>          | 54 (81.8) | 12 (18.2) | 97 (63.4)  | 56 (36.6)  | NA        | NA        | NA         | NA         | SNP stream |
| 4  |                           |           |           |            |            |           |           |            |            |            |
| 5  | Lee <sup>55</sup>         | 26 (57.8) | 19 (42.2) | 55 (57.9)  | 40 (42.1)  | NA        | NA        | NA         | NA         | Taqman     |
| 6  |                           |           |           |            |            |           |           |            |            |            |
| 7  |                           |           |           |            |            |           |           |            |            |            |
| 8  | Mishra <sup>39</sup>      | 31 (93.9) | 2 (6.1)   | 168 (97.1) | 5 (2.9)    | NA        | NA        | NA         | NA         | PCR-RFLP   |
| 9  |                           |           |           |            |            |           |           |            |            |            |
| 10 |                           |           |           |            |            |           |           |            |            |            |
| 11 | Rana <sup>56</sup>        | 28 (50.9) | 27 (49.1) | 150 (61.2) | 95 (38.8)  | NA        | NA        | NA         | NA         | PCR-RFLP   |
| 12 |                           |           |           |            |            |           |           |            |            |            |
| 13 | Santos <sup>57</sup>      | 15 (83.3) | 3 (16.7)  | 173 (75.6) | 56 (24.4)  | 15 (83.3) | 3 (16.7)  | 166 (72.8) | 62 (27.2)  | Taqman     |
| 14 |                           |           |           |            |            |           |           |            |            |            |
| 15 |                           |           |           |            |            |           |           |            |            |            |
| 16 | Sharma <sup>44</sup>      | 81 (77.1) | 24 (22.9) | 139 (75.1) | 46 (24.9)  | NA        | NA        | NA         | NA         | PCR-RFLP   |
| 17 |                           |           |           |            |            |           |           |            |            |            |
| 18 |                           |           |           |            |            |           |           |            |            |            |
| 19 | Singh <sup>3</sup>        | 42 (84.0) | 8 (16.0)  | 77 (56.6)  | 59 (43.4)  | NA        | NA        | NA         | NA         | PCR-RFLP   |
| 20 |                           |           |           |            |            |           |           |            |            |            |
| 21 |                           |           |           |            |            |           |           |            |            |            |
| 22 | Singla <sup>51</sup>      | 15 (88.0) | 2 (12.0)  | 375 (96.0) | 16 (4.0)   | NA        | NA        | NA         | NA         | PCR-RFLP   |
| 23 |                           |           |           |            |            |           |           |            |            |            |
| 24 |                           |           |           |            |            |           |           |            |            |            |
| 25 | Sotsuka <sup>52</sup>     | 11 (55.0) | 9 (45.0)  | 60 (65.2)  | 32 (34.8)  | 9 (45.0)  | 11 (55.0) | 45 (48.9)  | 47 (51.1)  | PCR-RFLP   |
| 26 |                           |           |           |            |            |           |           |            |            |            |
| 27 |                           |           |           |            |            |           |           |            |            |            |
| 28 | Tang <sup>46</sup>        | NA        | NA        | NA         | NA         | 47 (52.8) | 42 (47.2) | 204 (57.3) | 152 (42.7) | PCR-RFLP   |
| 29 |                           |           |           |            |            |           |           |            |            |            |
| 30 | Tang <sup>4</sup>         | 56 (62.9) | 33 (37.1) | 225 (63.2) | 131 (36.8) | NA        | NA        | NA         | NA         | Taqman     |
| 31 |                           |           |           |            |            |           |           |            |            |            |
| 32 |                           |           |           |            |            |           |           |            |            |            |
| 33 | Teixeira <sup>53</sup>    | 23 (88.5) | 3 (11.5)  | 128 (90.8) | 13 (9.2)   | NA        | NA        | NA         | NA         | PCR-RFLP   |
| 34 |                           |           |           |            |            |           |           |            |            |            |
| 35 |                           |           |           |            |            |           |           |            |            |            |
| 36 | Vuilleumier <sup>41</sup> | 7 (87.5)  | 1 (12.5)  | 58 (92.1)  | 5 (7.9)    | NA        | NA        | NA         | NA         | PCR-RFLP   |
| 37 |                           |           |           |            |            |           |           |            |            |            |
| 38 |                           |           |           |            |            |           |           |            |            |            |
| 39 |                           |           |           |            |            |           |           |            |            |            |
| 40 |                           |           |           |            |            |           |           |            |            |            |
| 41 |                           |           |           |            |            |           |           |            |            |            |
| 42 |                           |           |           |            |            |           |           |            |            |            |
| 43 |                           |           |           |            |            |           |           |            |            |            |
| 44 |                           |           |           |            |            |           |           |            |            |            |
| 45 |                           |           |           |            |            |           |           |            |            |            |
| 46 |                           |           |           |            |            |           |           |            |            |            |

|    |                                  |           |           |             |            |    |    |    |    |                                            |
|----|----------------------------------|-----------|-----------|-------------|------------|----|----|----|----|--------------------------------------------|
| 1  |                                  |           |           |             |            |    |    |    |    |                                            |
| 2  |                                  |           |           |             |            |    |    |    |    |                                            |
| 3  | Wang <sup>45</sup>               | 82 (78.8) | 22 (21.2) | 71 (64.0)   | 40 (36.0)  | NA | NA | NA | NA | PCR-RFLP                                   |
| 4  |                                  |           |           |             |            |    |    |    |    |                                            |
| 5  |                                  |           |           |             |            |    |    |    |    |                                            |
| 6  | Xiang <sup>54</sup>              | 58 (82.9) | 12 (17.1) | 1264 (79.0) | 336 (21.0) | NA | NA | NA | NA | PCR/ligase<br>detection<br>reaction assays |
| 7  |                                  |           |           |             |            |    |    |    |    |                                            |
| 8  |                                  |           |           |             |            |    |    |    |    |                                            |
| 9  | Yamada <sup>42</sup>             | 17 (73.9) | 6 (26.1)  | 107 (72.8)  | 40 (27.2)  | NA | NA | NA | NA | PCR-RFLP                                   |
| 10 |                                  |           |           |             |            |    |    |    |    |                                            |
| 11 |                                  |           |           |             |            |    |    |    |    |                                            |
| 12 | Zaverucha-do-Valle <sup>43</sup> | 48 (94.1) | 3 (5.9)   | 74 (94.9)   | 4 (5.1)    | NA | NA | NA | NA | PCR-RFLP                                   |
| 13 |                                  |           |           |             |            |    |    |    |    |                                            |

Abbreviations: *NA*, not available; *PCR*, polymerase chain reaction; *RFLP*, restriction fragment length polymorphism; *SNP*, single nucleotide polymorphism

**S5 Table. Genotype distribution and the genotyping method used for the *NAT2* genetic polymorphism in the included studies (n = 35)**

| Study                       | Case (number of individuals [%]) |                                  | Control (number of individuals [%]) |                                  | Genotyping method  |
|-----------------------------|----------------------------------|----------------------------------|-------------------------------------|----------------------------------|--------------------|
|                             | Slow acetylator                  | Intermediate and fast acetylator | Slow acetylator                     | Intermediate and fast acetylator |                    |
| An <sup>32</sup>            | 40 (39.6)                        | 61 (60.4)                        | 13 (12.1)                           | 94 (87.9)                        | Sequencing         |
| Ben Mahmoud <sup>5</sup>    | 11 (78.5)                        | 3 (21.5)                         | 22 (42.4)                           | 30 (57.6)                        | PCR-RFLP           |
| Bose <sup>33</sup>          | 29 (70.7)                        | 12 (29.3)                        | 79 (44.6)                           | 98 (55.4)                        | PCR-RFLP           |
| Bozok Cetintas <sup>6</sup> | 23 (76.7)                        | 7 (23.3)                         | 19 (27.1)                           | 51 (72.9)                        | PCR                |
| Brito <sup>48</sup>         | 9 (60.0)                         | 6 (40.0)                         | 56 (24.3)                           | 174 (75.7)                       | PCR-RFLP           |
| Chamorro <sup>34</sup>      | 28 (58.7)                        | 19 (41.3)                        | 48 (37.5)                           | 80 (62.5)                        | PCR-RFLP           |
| Cho <sup>35</sup>           | 7 (38.9)                         | 11 (61.1)                        | 12 (10.5)                           | 102 (89.5)                       | Sequencing         |
| Forestiero <sup>49</sup>    | 28 (47.4)                        | 31 (52.6)                        | 13 (32.5)                           | 27 (67.5)                        | PCR-RFLP           |
| Gupta <sup>36</sup>         | 28 (56.0)                        | 22 (44.0)                        | 63 (38.2)                           | 102 (61.8)                       | PCR-RFLP           |
| Higuchi <sup>7</sup>        | 6 (33.3)                         | 12 (66.7)                        | 4 (4.9)                             | 78 (95.1)                        | PCR-RFLP           |
| Ho <sup>8</sup>             | 12 (63.2)                        | 7 (36.8)                         | 67 (20.4)                           | 262 (79.6)                       | Sequenom MassARRAY |



1  
2  
3  
4  
5  
6  
7  
8  
9  
10  
11  
12  
13  
14  
15  
16  
17  
18  
19  
20  
21  
22  
23  
24  
25  
26  
27  
28  
29  
30  
31  
32  
33  
34  
35  
36  
37  
38  
39  
40  
41  
42  
43  
44  
45  
46

---

|                               |           |           |            |            |            |
|-------------------------------|-----------|-----------|------------|------------|------------|
| Huang <sup>9</sup>            | 14 (42.4) | 19 (57.6) | 39 (20.4)  | 152 (79.6) | PCR-RFLP   |
| Huang <sup>37</sup>           | 19 (38.8) | 30 (61.2) | 58 (21.6)  | 211 (78.4) | PCR-RFLP   |
| Khalili <sup>10</sup>         | 9 (64.3)  | 5 (35.7)  | 5 (13.9)   | 31 (86.1)  | PCR-RFLP   |
| Lee <sup>38</sup>             | 21 (46.7) | 24 (53.3) | 20 (21.1)  | 75 (78.9)  | Taqman     |
| Leiro-Fernandez <sup>11</sup> | 36 (72.0) | 14 (28.0) | 44 (65.7)  | 23 (34.3)  | PCR-RFLP   |
| Lv <sup>58</sup>              | 18 (20.2) | 71 (79.8) | 74 (20.8)  | 282 (79.2) | PCR-RFLP   |
| Mishra <sup>39</sup>          | 23 (70.0) | 10 (30.0) | 73 (42.0)  | 100 (58.0) | PCR-RFLP   |
| Ng <sup>13</sup>              | 22 (84.6) | 4 (15.4)  | 57 (56.4)  | 44 (43.6)  | PCR-RFLP   |
| Ohno <sup>14</sup>            | 7 (50.0)  | 7 (50.0)  | 0 (0.0)    | 63 (100.0) | PCR-RFLP   |
| Possuelo <sup>15</sup>        | 9 (64.3)  | 5 (35.7)  | 60 (25.0)  | 180 (75.0) | Sequencing |
| Rana <sup>16</sup>            | 19 (38.0) | 31 (62.0) | 30 (14.9)  | 171 (85.1) | PCR-RFLP   |
| Rana <sup>50</sup>            | 21 (38.2) | 34 (61.8) | 36 (14.7)  | 209 (85.3) | PCR-RFLP   |
| Santos <sup>40</sup>          | 11 (61.1) | 7 (38.9)  | 75 (29.8)  | 177 (70.2) | Sequencing |
| Shimizu <sup>17</sup>         | 4 (40.0)  | 6 (60.0)  | 1 (3.1)    | 31 (96.9)  | PCR-RFLP   |
| Singla <sup>51</sup>          | 15 (88.2) | 2 (11.8)  | 213 (54.5) | 178 (45.5) | PCR-RFLP   |

---

|                                  |           |           |            |             |                                      |
|----------------------------------|-----------|-----------|------------|-------------|--------------------------------------|
| Sotsuka <sup>52</sup>            | 8 (15.4)  | 44 (84.6) | 5 (5.4)    | 87 (94.6)   | PCR-RFLP                             |
| Teixeira <sup>53</sup>           | 18 (75.0) | 6 (25.0)  | 64 (51.2)  | 61 (48.8)   | Sequencing                           |
| Vuilleumier <sup>41</sup>        | 3 (37.5)  | 5 (62.5)  | 8 (12.7)   | 55 (87.3)   | PCR-RFLP                             |
| Wattanapokayakit <sup>19</sup>   | 38 (71.7) | 15 (28.3) | 15 (17.7)  | 70 (82.3)   | Sequencing                           |
| Xiang <sup>54</sup>              | 28 (31.5) | 61 (68.5) | 501 (23.2) | 1654 (76.8) | PCR/ligase detection reaction assays |
| Yamada <sup>42</sup>             | 14 (60.9) | 9 (39.1)  | 64 (43.5)  | 83 (56.5)   | Sequencing                           |
| Yimer <sup>47</sup>              | 31 (75.6) | 10 (24.4) | 107 (66.9) | 53 (33.1)   | Taqman                               |
| Yuliwulandari <sup>18</sup>      | 32 (64.0) | 18 (36.0) | 65 (34.0)  | 126 (66.0)  | Sequencing                           |
| Zaverucha-do-Valle <sup>43</sup> | 37 (71.2) | 15 (28.8) | 36 (45.6)  | 43 (54.4)   | Sequencing                           |

Abbreviations: *NA*, not available; *PCR*, polymerase chain reaction; *RFLP*, restriction fragment length polymorphism

**S6 Table. Genotype distribution and the genotyping method used for the GST genetic polymorphisms in the included studies (n = 19)**

| Study                    | <i>GSTM1</i> genotype (n = 19)   |              |                                     |               | <i>GSTT1</i> genotype (n = 17)   |              |                                     |               | <i>GSTM1/GSTT1</i> genotype (n = 11) |               |                                     |               | Genotyping method |
|--------------------------|----------------------------------|--------------|-------------------------------------|---------------|----------------------------------|--------------|-------------------------------------|---------------|--------------------------------------|---------------|-------------------------------------|---------------|-------------------|
|                          | Case (number of individuals [%]) |              | Control (number of individuals [%]) |               | Case (number of individuals [%]) |              | Control (number of individuals [%]) |               | Case (number of individuals [%])     |               | Control (number of individuals [%]) |               |                   |
|                          | Null                             | Non-null     | Null                                | Non-null      | Null                             | Non-null     | Null                                | Non-null      | Dual-null                            | One-/non-null | Dual-null                           | One-/non-null |                   |
| Brito <sup>48</sup>      | 6<br>(40.0)                      | 9<br>(60.0)  | 99<br>(43.0)                        | 131<br>(57.0) | 2<br>(13.3)                      | 13<br>(86.7) | 28<br>(12.2)                        | 202<br>(87.8) | 1<br>(6.7)                           | 14<br>(93.3)  | 12<br>(5.2)                         | 218<br>(94.8) | PCR               |
| Chatterjee <sup>20</sup> | 25<br>(49.0)                     | 26<br>(51.0) | 49<br>(49.0)                        | 51<br>(51.0)  | 3<br>(5.9)                       | 48<br>(94.1) | 3<br>(3.0)                          | 97<br>(97.0)  | 3<br>(5.9)                           | 48<br>(94.1)  | 11<br>(11.0)                        | 89<br>(89.0)  | Multiplex<br>PCR  |
| Forestiero <sup>49</sup> | 25<br>(42.4)                     | 34<br>(57.6) | 21<br>(52.5)                        | 19<br>(47.5)  | 10<br>(17.0)                     | 49<br>(83.0) | 8<br>(20.0)                         | 32<br>(80.0)  | 4<br>(6.8)                           | 55<br>(93.2)  | 5<br>(12.5)                         | 35<br>(87.5)  | Multiplex<br>PCR  |
| Gupta <sup>21</sup>      | 21<br>(42.0)                     | 29<br>(58.0) | 61<br>(24.8)                        | 185<br>(75.2) | 11<br>(22.0)                     | 39<br>(78.0) | 30<br>(12.2)                        | 216<br>(87.8) | 5<br>(10.0)                          | 45<br>(90.0)  | 4<br>(1.6)                          | 242<br>(98.4) | Multiplex<br>PCR  |
| Huang <sup>22</sup>      | 42<br>(66.7)                     | 21<br>(33.3) | 29<br>(46.0)                        | 34<br>(54.0)  | 24<br>(38.1)                     | 39<br>(61.9) | 25<br>(39.7)                        | 38<br>(60.3)  | NA                                   | NA            | NA                                  | NA            | Multiplex<br>PCR  |
| Kim <sup>23</sup>        | 26<br>(45.6)                     | 31<br>(54.4) | 104<br>(54.7)                       | 86<br>(45.3)  | 34<br>(59.6)                     | 23<br>(40.4) | 103<br>(54.2)                       | 87<br>(45.8)  | 17<br>(29.8)                         | 40<br>(70.2)  | 56<br>(29.6)                        | 133<br>(70.4) | PCR               |
| Leiro <sup>24</sup>      | 12<br>(34.3)                     | 23<br>(65.7) | 25<br>(41.7)                        | 35<br>(58.3)  | 17<br>(48.6)                     | 18<br>(51.4) | 16<br>(26.7)                        | 44<br>(73.3)  | 7<br>(20.0)                          | 28<br>(80.0)  | 6<br>(10.0)                         | 54<br>(90.0)  | PCR               |
| Liu <sup>25</sup>        | 14<br>(70.0)                     | 6<br>(30.0)  | 96<br>(67.1)                        | 47<br>(32.9)  | 13<br>(65.0)                     | 7<br>(35.0)  | 97<br>(67.8)                        | 46<br>(32.2)  | NA                                   | NA            | NA                                  | NA            | Multiplex<br>PCR  |

|    |                        |        |        |        |        |        |        |        |        |        |        |        |        |           |
|----|------------------------|--------|--------|--------|--------|--------|--------|--------|--------|--------|--------|--------|--------|-----------|
| 1  |                        |        |        |        |        |        |        |        |        |        |        |        |        |           |
| 2  |                        |        |        |        |        |        |        |        |        |        |        |        |        |           |
| 3  | Monteiro               | 21     | 38     | 34     | 84     | 11     | 48     | 28     | 90     | NA     | NA     | NA     | NA     | PCR       |
| 4  | <sup>26</sup>          | (35.6) | (64.4) | (28.8) | (71.2) | (18.7) | (81.3) | (23.8) | (76.2) |        |        |        |        |           |
| 5  |                        |        |        |        |        |        |        |        |        |        |        |        |        |           |
| 6  | Rana <sup>27</sup>     | 10     | 20     | 37     | 183    | 6      | 24     | 68     | 152    | 9      | 21     | 96     | 124    | PCR       |
| 7  |                        | (41.6) | (58.4) | (18.5) | (81.5) | (25.0) | (75.0) | (33.8) | (66.2) | (37.5) | (62.5) | (47.7) | (52.3) |           |
| 8  |                        |        |        |        |        |        |        |        |        |        |        |        |        |           |
| 9  | Rana <sup>16</sup>     | 19     | 36     | 42     | 203    | 14     | 41     | 81     | 164    | 22     | 33     | 122    | 123    | PCR       |
| 10 |                        | (34.5) | (65.5) | (17.1) | (82.9) | (25.5) | (74.5) | (33.1) | (66.9) | (40.0) | (60.0) | (49.8) | (50.2) |           |
| 11 |                        |        |        |        |        |        |        |        |        |        |        |        |        |           |
| 12 | Roy <sup>28</sup>      | 17     | 15     | 8      | 25     | 5      | 28     | 1      | 32     | NA     | NA     | NA     | NA     | PCR       |
| 13 |                        | (52.0) | (48.0) | (24.0) | (76.0) | (15.0) | (85.0) | (3.0)  | (97.0) |        |        |        |        |           |
| 14 |                        |        |        |        |        |        |        |        |        |        |        |        |        |           |
| 15 | Sharma <sup>44</sup>   | 42     | 63     | 68     | 117    | NA     | PCR       |
| 16 |                        | (40.0) | (60.0) | (36.7) | (63.3) |        |        |        |        |        |        |        |        |           |
| 17 |                        |        |        |        |        |        |        |        |        |        |        |        |        |           |
| 18 | Singla <sup>51</sup>   | 10     | 7      | 165    | 226    | 8      | 9      | 102    | 289    | 5      | 12     | 32     | 359    | Multiplex |
| 19 |                        | (59.0) | (41.0) | (42.0) | (58.0) | (47.0) | (53.0) | (26.0) | (74.0) | (29.0) | (71.0) | (8.0)  | (92.0) | PCR       |
| 20 |                        |        |        |        |        |        |        |        |        |        |        |        |        |           |
| 21 | Sotsuka <sup>52</sup>  | 12     | 8      | 50     | 42     | 7      | 13     | 40     | 52     | NA     | NA     | NA     | NA     | PCR       |
| 22 |                        | (60.0) | (40.0) | (54.3) | (45.7) | (35.0) | (65.0) | (43.5) | (56.5) |        |        |        |        |           |
| 23 |                        |        |        |        |        |        |        |        |        |        |        |        |        |           |
| 24 | Tang <sup>46</sup>     | 55     | 34     | 203    | 153    | 40     | 49     | 164    | 192    | 22     | 67     | 94     | 262    | Multiplex |
| 25 |                        | (61.8) | (38.2) | (57.0) | (43.0) | (44.9) | (55.1) | (46.1) | (53.9) | (24.7) | (75.3) | (26.4) | (73.6) | PCR       |
| 26 |                        |        |        |        |        |        |        |        |        |        |        |        |        |           |
| 27 | Teixeira <sup>53</sup> | 11     | 15     | 61     | 80     | 4      | 22     | 27     | 114    | NA     | NA     | NA     | NA     | Multiplex |
| 28 |                        | (42.3) | (57.7) | (43.3) | (56.7) | (15.4) | (84.6) | (19.2) | (80.8) |        |        |        |        | PCR       |
| 29 |                        |        |        |        |        |        |        |        |        |        |        |        |        |           |
| 30 | Wang <sup>45</sup>     | 63     | 41     | 54     | 57     | NA     | PCR       |
| 31 |                        | (60.6) | (39.4) | (48.6) | (51.4) |        |        |        |        |        |        |        |        |           |
| 32 |                        |        |        |        |        |        |        |        |        |        |        |        |        |           |
| 33 | Xiang <sup>54</sup>    | 41     | 48     | 925    | 1230   | 18     | 71     | 477    | 1678   | 7      | 68     | 283    | 1427   | PCR       |
| 34 |                        | (46.1) | (53.9) | (42.9) | (57.1) | (20.2) | (79.8) | (22.1) | (77.9) | (9.3)  | (90.7) | (16.5) | (83.5) |           |

Abbreviations: *NA*, not available; *PCR*, polymerase chain reaction

**S7 Table. Genotype distribution and the genotyping method used for the *SLCO1B1* genetic polymorphisms in the included studies (n = 4)**

| Study               | <i>SLCO1B1</i> 388A>G (rs2306283) |              |              |                                     |               |               | <i>SLCO1B1</i> 521T>C (rs4149056) |              |            |                                     |              |            | Genotyping method     |
|---------------------|-----------------------------------|--------------|--------------|-------------------------------------|---------------|---------------|-----------------------------------|--------------|------------|-------------------------------------|--------------|------------|-----------------------|
|                     | Case (number of individuals [%])  |              |              | Control (number of individuals [%]) |               |               | Case (number of individuals [%])  |              |            | Control (number of individuals [%]) |              |            |                       |
|                     | AA                                | AG           | GG           | AA                                  | AG            | GG            | TT                                | CT           | CC         | TT                                  | CT           | CC         |                       |
| Chen <sup>29</sup>  | 8<br>(9.0)                        | 34<br>(38.2) | 47<br>(52.8) | 33<br>(7.5)                         | 164<br>(37.1) | 245<br>(55.4) | 72<br>(80.9)                      | 15<br>(16.9) | 2<br>(2.2) | 351<br>(79.6)                       | 87<br>(19.7) | 3<br>(0.7) | Taqman                |
| Kim <sup>30</sup>   | 6<br>(9.2)                        | 26<br>(40.0) | 33<br>(50.8) | 11<br>(7.1)                         | 60<br>(38.5)  | 85<br>(54.5)  | 46<br>(69.7)                      | 20<br>(30.3) | 0<br>(0.0) | 113<br>(72.4)                       | 40<br>(25.6) | 3<br>(1.9) | SNPstream             |
| Li <sup>31</sup>    | 11<br>(9.3)                       | 38<br>(32.2) | 69<br>(58.5) | 12<br>(7.7)                         | 48<br>(31.0)  | 95<br>(61.3)  | 83<br>(70.3)                      | 34<br>(28.8) | 1<br>(0.8) | 136<br>(87.7)                       | 18<br>(11.6) | 1<br>(0.7) | PCR direct sequencing |
| Yimer <sup>47</sup> | 9<br>(22.0)                       | 17<br>(41.5) | 15<br>(36.6) | 20<br>(12.5)                        | 87<br>(54.4)  | 53<br>(33.1)  | 27<br>(65.9)                      | 13<br>(31.7) | 1<br>(2.4) | 107<br>(66.9)                       | 49<br>(30.6) | 4<br>(2.5) | Taqman                |

Abbreviations: *PCR*, polymerase chain reaction; *SNP*, single nucleotide polymorphism

1  
2  
3 **(A) *CYP2E1* *RsaI/PstI* polymorphism**  
4  
5

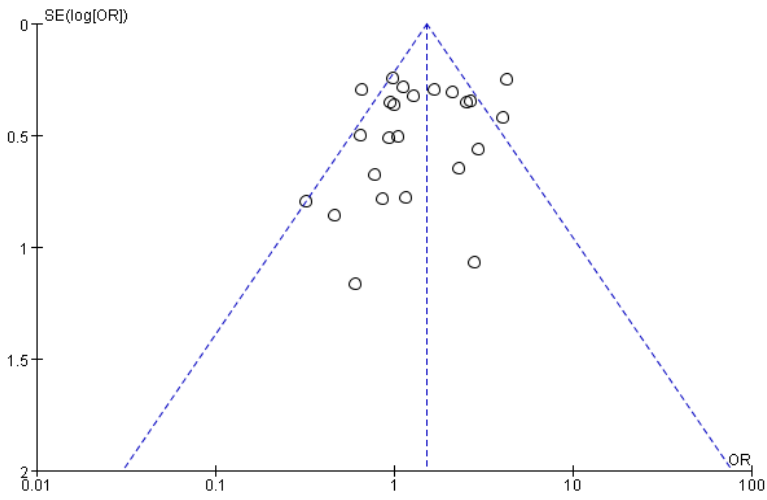

22 **(B) *CYP2E1* *DraI* polymorphism**  
23  
24

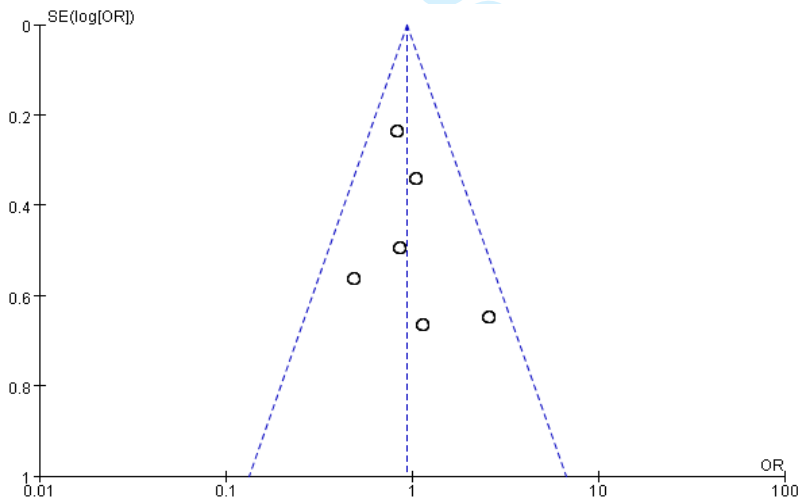

42 **(C) *NAT2* polymorphism**  
43  
44

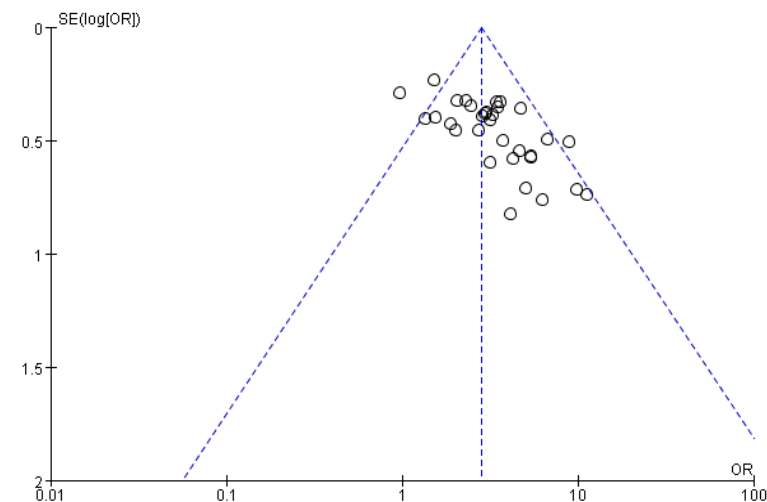

1  
2  
3  
4 **(D) *GSTM1* polymorphism**

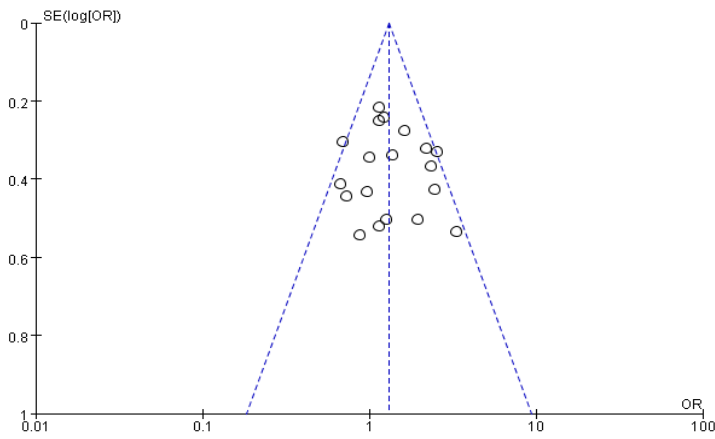

19  
20  
21  
22 **(E) *GSTT1* polymorphism**

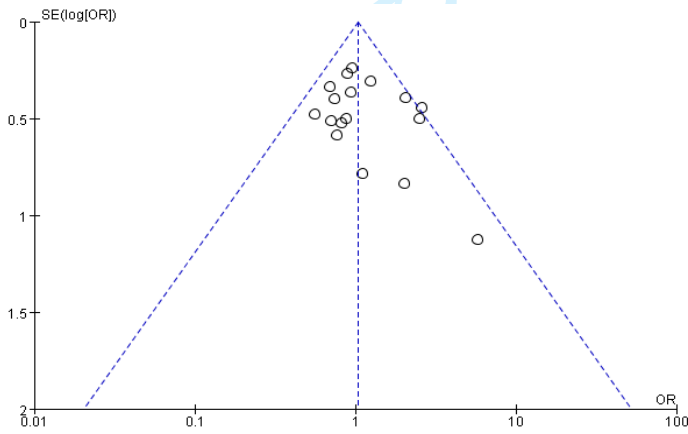

39  
40 **(F) *GSTT1/M1* polymorphism**

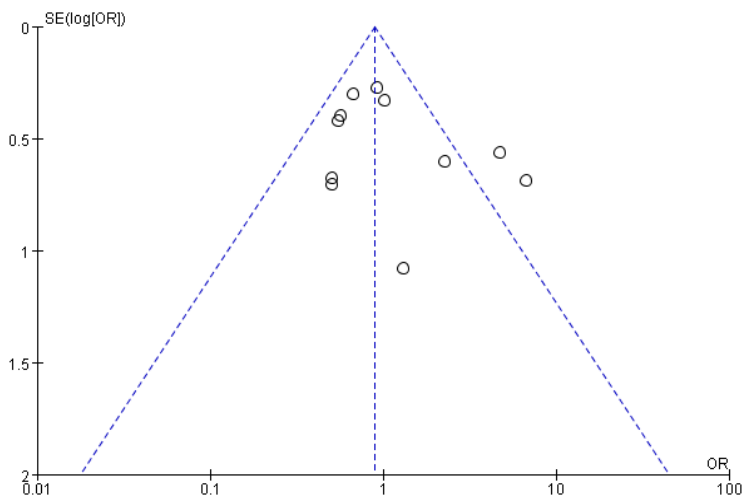

1  
2  
3 **(G) *SLCO1B1* 388A>G and 521T>C polymorphism**  
4  
5

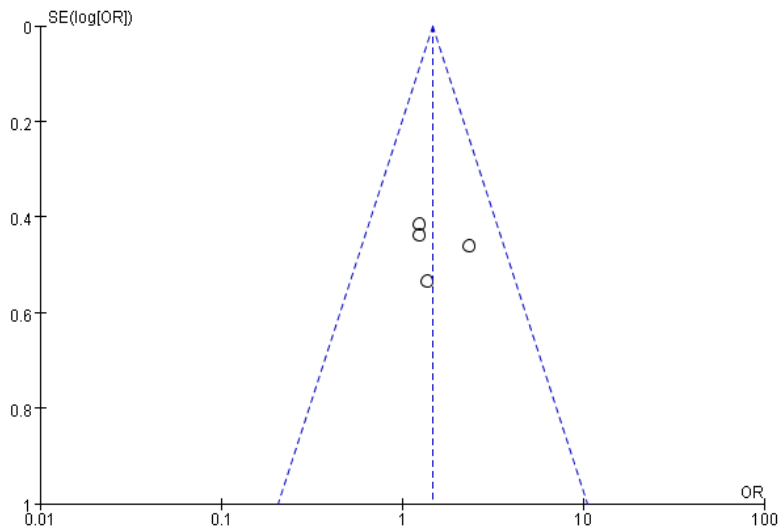

**S8 Figure.** Funnel plots to evaluate publication bias for the *CYP2E1*, *NAT2*, *GST*, and *SLCO1B1* polymorphisms associated with the risk of anti-tuberculosis drug-induced liver injury. (A) *CYP2E1* *RsaI/PstI* polymorphism, (B) *CYP2E1* *DraI* polymorphism, (C) *NAT2* polymorphism, (D) *GSTM1* polymorphism, (E) *GSTT1* polymorphism, (F) *GSTT1/M1* polymorphism, and (G) *SLCO1B1* 388A>G and 521T>C polymorphism.



**S9 Table. Subgroup analysis for the association between *CYP2E1* polymorphisms and the risk of anti-tuberculosis drug-induced liver injury based on ethnicity, anti-tuberculosis drug regimen, and study design**

| Polymorphic gene                                     | Subgroup                                              | Number of studies | Case/control (n) | Test of association |                      | Model of meta-analysis | Test of heterogeneity |                      |        |
|------------------------------------------------------|-------------------------------------------------------|-------------------|------------------|---------------------|----------------------|------------------------|-----------------------|----------------------|--------|
|                                                      |                                                       |                   |                  | OR [95% CI]         | P value <sup>a</sup> |                        | I <sup>2</sup> , %    | P value <sup>b</sup> |        |
| <i>CYP2E1 RsaI/PstI</i><br>(c1/c1 vs. c1/c2 + c2/c2) | Total                                                 | 24                | 1293/5450        | 1.39 [1.06, 1.83]   | 0.02                 | Random                 | 60                    | <0.0001              |        |
|                                                      | Ethnicity                                             | East Asian        | 10               | 736/3076            | 1.62 [1.12, 2.36]    | 0.01                   | Random                | 69                   | 0.0006 |
|                                                      |                                                       | Indian            | 6                | 310/1295            | 1.08 [0.52, 2.25]    | 0.85                   | Random                | 70                   | 0.005  |
|                                                      |                                                       | South American    | 6                | 216/869             | 1.30 [0.83, 2.03]    | 0.25                   | Fixed                 | 0                    | 0.49   |
|                                                      |                                                       | Others            | 2                | 31/210              | 0.98 [0.39, 2.45]    | 0.96                   | Fixed                 | 0                    | 0.66   |
|                                                      | Anti-TB drug regimen                                  | INH alone         | 2                | 31/210              | 0.98 [0.39, 2.45]    | 0.96                   | Fixed                 | 0                    | 0.66   |
|                                                      |                                                       | Combination       | 21               | 1212/5104           | 1.35 [1.01, 1.79]    | <0.00001               | Random                | 61                   | 0.0002 |
|                                                      | Study design                                          | Cohort            | 11               | 564/3120            | 1.32 [0.94, 1.87]    | 0.11                   | Random                | 50                   | 0.03   |
|                                                      |                                                       | Case-control      | 12               | 729/2330            | 1.42 [0.93, 2.16]    | 0.10                   | Random                | 65                   | 0.0006 |
|                                                      | <i>CYP2E1 DraI<sup>c</sup></i><br>(D/D vs. D/C + C/C) | Total             | 6                | 233/1272            | 0.93 [0.68, 1.27]    | 0.64                   | Fixed                 | 0                    | 0.51   |
| Ethnicity                                            |                                                       | East Asian        | 2                | 109/448             | 0.84 [0.55, 1.28]    | 0.41                   | Fixed                 | 0                    | 0.96   |
|                                                      |                                                       | Indian            | 2                | 91/342              | 0.83 [0.48, 1.45]    | 0.51                   | Fixed                 | 27                   | 0.24   |
|                                                      |                                                       | South American    | 2                | 33/482              | 1.80 [0.73, 4.45]    | 0.20                   | Fixed                 | 0                    | 0.37   |
| Study design                                         |                                                       | Cohort            | 2                | 56/407              | 0.68 [0.31, 1.50]    | 0.33                   | Fixed                 | 0                    | 0.33   |
|                                                      |                                                       | Case-control      | 4                | 177/865             | 0.99 [0.70, 1.38]    | 0.94                   | Fixed                 | 0                    | 0.42   |

Abbreviations: *CI*, confidence interval; *CYP2E1*, cytochrome P450 2E1; *INH*, isoniazid; *OR*, odds ratio; *TB*, tuberculosis

<sup>a</sup> P value from Z test

1  
2  
3   <sup>b</sup> P value from Cochran's Q test based on chi-square statistic

4   <sup>c</sup> Subgroup analysis based on anti-TB drug regimen could not be performed due to insufficient information provided.  
5  
6  
7  
8  
9

10  
11  
12  
13  
14  
15  
16  
17  
18  
19  
20  
21  
22  
23  
24  
25  
26  
27  
28  
29  
30  
31  
32  
33  
34  
35  
36  
37  
38  
39  
40  
41  
42  
43  
44  
45  
46

For peer review only

**S10 Table. Subgroup analysis for the association between *NAT2* polymorphism and the risk of anti-tuberculosis drug-induced liver injury based on ethnicity, anti-tuberculosis drug regimen, and study design**

| Polymorphic gene                                                      | Subgroup             | Number of studies | Case/control (n) | Test of association |                      | Model of meta-analysis | Test of heterogeneity |                      |          |
|-----------------------------------------------------------------------|----------------------|-------------------|------------------|---------------------|----------------------|------------------------|-----------------------|----------------------|----------|
|                                                                       |                      |                   |                  | OR [95% CI]         | P value <sup>a</sup> |                        | I <sup>2</sup> , %    | P value <sup>b</sup> |          |
| <i>NAT2</i><br>(Slow acetylator vs. fast and intermediate acetylator) | Total                | 35                | 1323/7319        | 3.30 [2.65, 4.11]   | <0.00001             | Random                 | 47                    | 0.002                |          |
|                                                                       | Ethnicity            | East Asian        | 13               | 590/3970            | 4.00 [2.42, 6.60]    | <0.00001               | Random                | 77                   | <0.00001 |
|                                                                       |                      | Indian            | 6                | 246/1352            | 3.07 [2.26, 4.16]    | <0.00001               | Fixed                 | 0                    | 0.74     |
|                                                                       |                      | West Asian        | 2                | 44/106              | 9.51 [4.19, 21.61]   | <0.00001               | Fixed                 | 0                    | 0.79     |
|                                                                       |                      | South American    | 7                | 231/1110            | 2.94 [2.11, 4.08]    | <0.00001               | Fixed                 | 0                    | 0.75     |
|                                                                       |                      | African           | 2                | 55/212              | 2.08 [1.06, 4.10]    | 0.03                   | Fixed                 | 52                   | 0.15     |
|                                                                       |                      | Others            | 5                | 157/569             | 2.56 [1.72, 3.79]    | <0.00001               | Fixed                 | 15                   | 0.32     |
|                                                                       | Anti-TB drug regimen | INH alone         | 2                | 31/210              | 2.32 [1.05, 5.13]    | 0.04                   | Fixed                 | 0                    | 0.45     |
|                                                                       |                      | Combination       | 32               | 1256/6954           | 3.37 [2.67, 4.25]    | <0.00001               | Random                | 56                   | <0.0001  |
|                                                                       |                      | Cohort            | 18               | 673/4850            | 2.82 [2.35, 3.40]    | <0.00001               | Fixed                 | 40                   | 0.04     |
| Study design                                                          | Case-control         | 17                | 650/2469         | 3.53 [2.42, 5.16]   | <0.00001             | Random                 | 65                    | 0.0001               |          |

Abbreviations: *CI*, confidence interval; *INH*, isoniazid; *NAT2*, N-acetyltransferase 2; *OR*, odds ratio; *TB*, tuberculosis

<sup>a</sup> P value from Z test

<sup>b</sup> P value from Cochran's Q test based on chi-square statistic

**S11 Table. Subgroup analysis for the association between *GST* polymorphisms and the risk of anti-tuberculosis drug-induced liver injury based on ethnicity, anti-tuberculosis drug regimen, and study design**

| Polymorphic gene                                                 | Subgroup     | Number of studies | Case/control (n) | Test of association |                      | Model of meta-analysis | Test of heterogeneity |                      |        |
|------------------------------------------------------------------|--------------|-------------------|------------------|---------------------|----------------------|------------------------|-----------------------|----------------------|--------|
|                                                                  |              |                   |                  | OR [95% CI]         | P value <sup>a</sup> |                        | I <sup>2</sup> , %    | P value <sup>b</sup> |        |
| <i>GSTM1</i> <sup>c</sup><br>(null vs. non-null)                 | Total        | 19                | 977/5119         | 1.30 [1.12, 1.52]   | 0.0007               | Fixed                  | 33                    | 0.08                 |        |
|                                                                  | Ethnicity    | East Asian        | 7                | 442/3110            | 1.23 [0.99, 1.54]    | 0.06                   | Fixed                 | 23                   | 0.25   |
|                                                                  |              | Indian            | 7                | 341/1420            | 1.68 [1.30, 2.19]    | <0.0001                | Fixed                 | 36                   | 0.15   |
|                                                                  |              | Brazilian         | 4                | 159/529             | 0.98 [0.66, 1.47]    | 0.94                   | Fixed                 | 0                    | 0.60   |
|                                                                  | Study design | Cohort            | 8                | 462/3439            | 1.41 [1.04, 1.93]    | 0.03                   | Random                | 44                   | 0.08   |
|                                                                  |              | Case-control      | 11               | 515/1680            | 1.25 [1.01, 1.55]    | 0.20                   | Fixed                 | 29                   | 0.17   |
| <i>GSTT1</i> <sup>c</sup><br>(null vs. non-null)                 | Total        | 17                | 768/4823         | 1.03 [0.85, 1.25]   | 0.76                 | Fixed                  | 16                    | 0.26                 |        |
|                                                                  | Ethnicity    | East Asian        | 6                | 338/2999            | 0.96 [0.74, 1.24]    | 0.75                   | Fixed                 | 0                    | 0.94   |
|                                                                  |              | Indian            | 6                | 236/1235            | 1.37 [0.72, 2.59]    | 0.33                   | Random                | 57                   | 0.04   |
|                                                                  |              | Brazilian         | 4                | 159/529             | 0.80 [0.47, 1.33]    | 0.39                   | Fixed                 | 0                    | 0.97   |
|                                                                  | Study design | Cohort            | 8                | 408/3354            | 0.89 [0.67, 1.19]    | 0.44                   | Fixed                 | 3                    | 0.41   |
|                                                                  |              | Case-control      | 9                | 360/1469            | 1.16 [0.90, 1.50]    | 0.26                   | Fixed                 | 24                   | 0.23   |
| <i>GSTM1/GSTT1</i> <sup>c</sup><br>(dual-null vs. one-/non-null) | Total        | 11                | 547/4233         | 1.05 [0.67, 1.62]   | 0.84                 | Random                 | 59                    | 0.006                |        |
|                                                                  | Ethnicity    | East Asian        | 3                | 235/2701            | 0.83 [0.58, 1.20]    | 0.33                   | Fixed                 | 0                    | 0.49   |
|                                                                  |              | Indian            | 5                | 203/1202            | 1.33 [0.50, 3.53]    | 0.56                   | Random                | 80                   | 0.0005 |
|                                                                  |              | Brazilian         | 2                | 74/270              | 0.67 [0.20, 2.18]    | 0.50                   | Fixed                 | 0                    | 0.47   |
|                                                                  | Study design | Cohort            | 6                | 298/3136            | 0.85 [0.45, 1.61]    | 0.62                   | Random                | 58                   | 0.04   |
|                                                                  |              | Case-control      | 5                | 249/1097            | 1.31 [0.71, 2.43]    | 0.39                   | Random                | 59                   | 0.04   |

Abbreviations: *CI*, confidence interval; *GSTM1*, glutathione S-transferase Mu 1; *GSTT1*, glutathione S-transferase Theta 1; *OR*, odds ratio

<sup>a</sup> P value from Z test

1  
2  
3  
4  
5  
6  
7  
8  
9  
10  
11  
12  
13  
14  
15  
16  
17  
18  
19  
20  
21  
22  
23  
24  
25  
26  
27  
28  
29  
30  
31  
32  
33  
34  
35  
36  
37  
38  
39  
40  
41  
42  
43  
44  
45  
46

<sup>b</sup> P value from Cochran's Q test based on chi-square statistic

<sup>c</sup> Subgroup analysis based on anti-tuberculosis drug regimen could not be performed due to insufficient information provided

For peer review only

## References

1. Feng FM, Guo M, Chen Y, *et al.* Genetic polymorphisms in metabolic enzymes and susceptibility to anti-tuberculosis drug-induced hepatic injury. *Genetics and Molecular Research* 2014;13:9463-71.
2. Kim SH, Kim SH, Bahn JW, *et al.* Genetic polymorphisms of drug-metabolizing enzymes and anti-TB drug-induced hepatitis. *Pharmacogenomics* 2009;10:1767-79.
3. Singh M, Gupta VH, Amarapurkar DN, *et al.* Association of genetic variants with anti-tuberculosis drug induced hepatotoxicity: A high resolution melting analysis. *Infection Genetics and Evolution* 2014;23:42-8.
4. Tang S, Lv X, Zhang Y, *et al.* Cytochrome P450 2E1 Gene Polymorphisms/Haplotypes and Anti-Tuberculosis Drug-Induced Hepatitis in a Chinese Cohort. *PLoS ONE* 2013;8:e57526.
5. Ben Mahmoud L, Ghozzi H, Kamoun A, *et al.* Polymorphism of the N-acetyltransferase 2 gene as a susceptibility risk factor for antituberculosis drug-induced hepatotoxicity in Tunisian patients with tuberculosis. *Pathologie Biologie* 2012;60:324-30.
6. Bozok Cetintas V, Erer OF, Kosova B, *et al.* Determining the relation between N-acetyltransferase-2 acetylator phenotype and antituberculosis drug induced hepatitis by molecular biologic tests. *Tuberk Toraks* 2008;56:81-6.
7. Higuchi N, Tahara N, Yanagihara K, *et al.* NAT2 6A, a haplotype of the N-acetyltransferase 2 gene, is an important biomarker for risk of anti-tuberculosis drug-induced hepatotoxicity in Japanese patients with tuberculosis. *World J Gastroenterol* 2007;13:6003-8.
8. Ho HT, Wang TH, Hsiong CH, *et al.* The NAT2 tag SNP rs1495741 correlates with the susceptibility of antituberculosis drug-induced hepatotoxicity. *Pharmacogenet Genomics* 2013;23:200-7.
9. Huang YS, Chern HD, Su WJ, *et al.* Polymorphism of the N-acetyltransferase 2 gene as a susceptibility risk factor for antituberculosis drug-induced hepatitis. *Hepatology* 2002;35:883-9.
10. Khalili H, Fouladdel S, Sistanizad M, *et al.* Association of N-acetyltransferase-2 genotypes and anti-tuberculosis induced liver injury: First case-controlled study from Iran. *Current Drug Safety* 2011;6:17-22.
11. Leiro-Fernandez V, Valverde D, Vazquez-Gallardo R, *et al.* N-acetyltransferase 2 polymorphisms and risk of anti-tuberculosis drug-induced hepatotoxicity in Caucasians. *International Journal of Tuberculosis and Lung Disease* 2011;15:1403-8.
12. Lv X, Tang S, Xia Y, *et al.* NAT2 genetic polymorphisms and anti-tuberculosis drug-induced hepatotoxicity in Chinese community population. *Ann Hepatol* 2012;11:700-7.
13. Ng CS, Hasnat A, Al Maruf A, *et al.* N-acetyltransferase 2 (NAT2) genotype as a risk factor for development of drug-induced liver injury relating to antituberculosis drug treatment in a mixed-ethnicity patient group. *European Journal of Clinical Pharmacology* 2014;70:1079-86.
14. Ohno M, Yamaguchi I, Yamamoto I, *et al.* Slow N-acetyltransferase 2 genotype affects the incidence of isoniazid and rifampicin-induced hepatotoxicity. *International Journal of Tuberculosis and Lung Disease* 2000;4:256-61.

- 1
- 2
- 3 15. Possuelo LG, Castelan JA, de Brito TC, *et al.* Association of slow N-acetyltransferase 2 profile and
- 4 anti-TB drug-induced hepatotoxicity in patients from Southern Brazil. *European Journal of Clinical*
- 5 *Pharmacology* 2008;64:673-81.
- 6
- 7 16. Rana SV, Ola RP, Sharma SK, *et al.* Comparison between acetylator phenotype and genotype
- 8 polymorphism of n-acetyltransferase-2 in tuberculosis patients. *Hepatology International* 2012;6:397-
- 9 402.
- 10
- 11 17. Shimizu Y, Dobashi K, Mita Y, *et al.* DNA microarray genotyping of N-acetyltransferase 2
- 12 polymorphism using carbodiimide as the linker for assessment of isoniazid hepatotoxicity.
- 13 *Tuberculosis* 2006;86:374-81.
- 14
- 15 18. Yuliwulandari R, Susilowati RW, Wicaksono BD, *et al.* NAT2 variants are associated with drug-
- 16 induced liver injury caused by anti-tuberculosis drugs in Indonesian patients with tuberculosis. *J Hum*
- 17 *Genet* 2016; doi:10.1038/jhg.2016.10.
- 18
- 19 19. Wattanapokayakit S, Mushiroda T, Yanai H, *et al.* NAT2 slow acetylator associated with anti-
- 20 tuberculosis drug-induced liver injury in Thai patients. *Int J Tuberc Lung Dis* 2016;20:1364-9.
- 21
- 22 20. Chatterjee S, Lyle N, Mandal A, *et al.* GSTT1 and GSTM1 gene deletions are not associated with
- 23 hepatotoxicity caused by antitubercular drugs. *Journal of Clinical Pharmacy and Therapeutics*
- 24 2010;35:465-70.
- 25
- 26 21. Gupta VH, Singh M, Amarapurkar DN, *et al.* Association of GST null genotypes with anti-
- 27 tuberculosis drug induced hepatotoxicity in Western Indian population. *Annals of Hepatology*
- 28 2013;12:959-65.
- 29
- 30 22. Huang YS, Su WJ, Huang YH, *et al.* Genetic polymorphisms of manganese superoxide dismutase,
- 31 NAD(P)H : quinone oxidoreductase, glutathione S-transferase M1 and T1, and the susceptibility to
- 32 drug-induced liver injury. *Journal of Hepatology* 2007;47:128-34.
- 33
- 34 23. Kim SH, Kim SH, Yoon HJ, *et al.* GSTT1 and GSTM1 null mutations and adverse reactions induced
- 35 by antituberculosis drugs in Koreans. *Tuberculosis* 2010;90:39-43.
- 36
- 37 24. Leiro V, Fernandez-Villar A, Valverde D, *et al.* Influence of glutathione S-transferase M1 and T1
- 38 homozygous null mutations on the risk of antituberculosis drug-induced hepatotoxicity in a Caucasian
- 39 population. *Liver International* 2008;28:835-9.
- 40
- 41 25. Liu F, Jiao AX, Wu XR, *et al.* Impact of Glutathione S-Transferase M1 and T1 on Anti-Tuberculosis
- 42 Drug-Induced Hepatotoxicity in Chinese Pediatric Patients. *Plos One* 2014;9.
- 43
- 44 26. Monteiro TP, El-Jaick KB, Jeovanio-Silva AL, *et al.* The roles of GSTM1 and GSTT1 null genotypes
- 45 and other predictors in anti-tuberculosis drug-induced liver injury. *Journal of Clinical Pharmacy and*
- 46 *Therapeutics* 2012;37:712-8.
- 47
- 48 27. Rana SV, Kamboj JK, Sharma SK, *et al.* Antioxidant status and GST gene polymorphisms in
- 49 antitubercular treatment-induced hepatotoxicity patients. *Hepatol Int* 2013;7:876-82.
- 50
- 51 28. Roy B, Chowdhury A, Kundu S, *et al.* Increased risk of antituberculosis drug-induced hepatotoxicity
- 52 in individuals with glutathione S-transferase M1 'null' mutation. *Journal of Gastroenterology and*
- 53 *Hepatology* 2001;16:1033-7.
- 54
- 55 29. Chen R, Wang J, Tang S, *et al.* Association of polymorphisms in drug transporter genes (SLCO1B1
- 56 and SLC10A1) and anti-tuberculosis drug-induced hepatotoxicity in a Chinese cohort. *Tuberculosis*
- 57
- 58
- 59
- 60

- 2015;95:68-74.
30. Kim SH, Kim SH, Lee JH, *et al.* Polymorphisms in drug transporter genes (ABCB1, SLCO1B1 and ABCC2) and hepatitis induced by antituberculosis drugs. *Tuberculosis* 2012;92:100-4.
  31. Li LM, Chen L, Deng GH, *et al.* SLCO1B1\*15 haplotype is associated with rifampin-induced liver injury. *Molecular Medicine Reports* 2012;6:75-82.
  32. An HR, Wu XQ, Wang ZY, *et al.* NAT2 and CYP2E1 polymorphisms associated with antituberculosis drug-induced hepatotoxicity in Chinese patients. *Clinical and Experimental Pharmacology and Physiology* 2012;39:535-43.
  33. Bose PD, Sarma MP, Medhi S, *et al.* Role of polymorphic N-acetyl transferase2 and cytochrome P4502E1 gene in antituberculosis treatment-induced hepatitis. *Journal of Gastroenterology and Hepatology* 2011;26:312-8.
  34. Chamorro JG, Castagnino JP, Musella RM, *et al.* Sex, ethnicity, and slow acetylator profile are the major causes of hepatotoxicity induced by antituberculosis drugs. *Journal of Gastroenterology and Hepatology* 2013;28:323-8.
  35. Cho HJ, Koh WJ, Ryu YJ, *et al.* Genetic polymorphisms of NAT2 and CYP2E1 associated with antituberculosis drug-induced hepatotoxicity in Korean patients with pulmonary tuberculosis. *Tuberculosis* 2007;87:551-6.
  36. Gupta VH, Amarapurkar DN, Singh M, *et al.* Association of N-acetyltransferase 2 and cytochrome P450 2E1 gene polymorphisms with antituberculosis drug-induced hepatotoxicity in Western India. *Journal of Gastroenterology and Hepatology* 2013;28:1368-74.
  37. Huang YS, Chern HD, Su WJ, *et al.* Cytochrome p450 2E1 genotype and the susceptibility to antituberculosis drug-induced hepatitis. *Hepatology* 2003;37:924-30.
  38. Lee SW, Chung LS, Huang HH, *et al.* NAT2 and CYP2E1 polymorphisms and susceptibility to first-line anti-tuberculosis drug-induced hepatitis. *Int J Tuberc Lung Dis* 2010;14:622-6.
  39. Mishra S, Daschakraborty S, Shukla P, *et al.* N-acetyltransferase and cytochrome P450 2E1 gene polymorphisms and susceptibility to antituberculosis drug hepatotoxicity in an Indian population. *National Medical Journal of India* 2013;26:260-5.
  40. Santos NP, Callegari-Jacques SM, Ribeiro Dos Santos AK, *et al.* N-acetyl transferase 2 and cytochrome P450 2E1 genes and isoniazid-induced hepatotoxicity in Brazilian patients. *Int J Tuberc Lung Dis* 2013;17:499-504.
  41. Vuilleumier N, Rossier MF, Chiappe A, *et al.* CYP2E1 genotype and isoniazid-induced hepatotoxicity in patients treated for latent tuberculosis. *Eur J Clin Pharmacol* 2006;62:423-9.
  42. Yamada S, Tang M, Richardson K, *et al.* Genetic variations of NAT2 and CYP2E1 and isoniazid hepatotoxicity in a diverse population. *Pharmacogenomics* 2009;10:1433-45.
  43. Zaverucha-do-Valle C, Monteiro SP, El-Jaick KB, *et al.* The role of cigarette smoking and liver enzymes polymorphisms in anti-tuberculosis drug-induced hepatotoxicity in Brazilian patients. *Tuberculosis (Edinb)* 2014;94:299-305.
  44. Sharma SK, Jha BK, Sharma A, *et al.* Genetic polymorphisms of CYP2E1 and GSTM1 loci and susceptibility to anti-tuberculosis drug-induced hepatotoxicity. *International Journal of Tuberculosis and Lung Disease* 2014;18:588-93.



- 1  
2  
3 45. Wang T, Yu HT, Wang W, *et al.* Genetic Polymorphisms of Cytochrome P450 and Glutathione S-  
4 transferase Associated with Antituberculosis Drug-induced Hepatotoxicity in Chinese Tuberculosis  
5 Patients. *Journal of International Medical Research* 2010;38:977-86.  
6  
7 46. Tang SW, Lv XZ, Zhang Y, *et al.* CYP2E1, GSTM1 and GSTT1 genetic polymorphisms and  
8 susceptibility to antituberculosis drug-induced hepatotoxicity: a nested case-control study. *Journal of*  
9 *Clinical Pharmacy and Therapeutics* 2012;37:588-93.  
10  
11 47. Yimer G, Ueda N, Habtewold A, *et al.* Pharmacogenetic & pharmacokinetic biomarker for efavirenz  
12 based ARV and rifampicin based anti-TB drug induced liver injury in TB-HIV infected patients. *PLoS*  
13 *One* 2011;6:e27810.  
14  
15 48. Brito TC, Possuelo LG, Valim ARM, *et al.* Polymorphisms in CYP2E1, GSTM1 and GSTT1 and anti-  
16 tuberculosis drug-induced hepatotoxicity. *Anais Da Academia Brasileira De Ciencias* 2014;86:855-  
17 65.  
18  
19 49. Forestiero FJ, Cecon L, Hirata MH, *et al.* Relationship of NAT2, CYP2E1 and GSTM1/GSTT1  
20 polymorphisms with mild elevation of liver enzymes in Brazilian individuals under anti-tuberculosis  
21 drug therapy. *Clinica Chimica Acta* 2013;415:215-9.  
22  
23 50. Rana SV, Sharma SK, Ola RP, *et al.* N-acetyltransferase 2, cytochrome P4502E1 and glutathione S-  
24 transferase genotypes in antitubercular treatment-induced hepatotoxicity in North Indians. *J Clin*  
25 *Pharm Ther* 2014;39:91-6.  
26  
27 51. Singla N, Gupta D, Birbian N, *et al.* Association of NAT2, GST and CYP2E1 polymorphisms and  
28 anti-tuberculosis drug-induced hepatotoxicity. *Tuberculosis* 2014;94:293-8.  
29  
30 52. Sotsuka T, Sasaki Y, Hirai S, *et al.* Association of Isoniazid-metabolizing Enzyme Genotypes and  
31 Isoniazid-induced Hepatotoxicity in Tuberculosis Patients. *In Vivo* 2011;25:803-12.  
32  
33 53. Teixeira RL, Morato RG, Cabello PH, *et al.* Genetic polymorphisms of NAT2, CYP2E1 and GST  
34 enzymes and the occurrence of antituberculosis drug-induced hepatitis in Brazilian TB patients. *Mem*  
35 *Inst Oswaldo Cruz* 2011;106:716-24.  
36  
37 54. Xiang Y, Ma L, Wu WD, *et al.* The Incidence of Liver Injury in Uyghur Patients Treated for TB in  
38 Xinjiang Uyghur Autonomous Region, China, and Its Association with Hepatic Enzyme  
39 Polymorphisms NAT2, CYP2E1, GSTM1 and GSTT1. *Plos One* 2014;9.  
40  
41  
42  
43  
44  
45  
46  
47  
48  
49  
50  
51  
52  
53  
54  
55  
56  
57  
58  
59  
60
