# Supplementary material for: Association of genetic polymorphisms of CYP2E1, NAT2, GST and SLCO1B1 with the risk of anti-tuberculosis drug-induced liver injury: a systematic review and meta-analysis
Source: PubMed Central journal article supplement — BMJ Open. 2019 Aug 1;9(8):e027940. doi: 10.1136/bmjopen-2018-027940 (PMC6688699; doi:10.1136/bmjopen-2018-027940), 2019-08-01
Supplement: bmjopen-2018-027940supp001.pdf [file bmjopen-2018-027940supp001.pdf]

## Supplementary data

**S1 Table. Completed MOOSE (Meta-analysis Of Observational Studies in Epidemiology) checklist**

| Item No                                     | Recommendation                                                                                                                                                                                                                                                               | Reported on Page No   |
|---------------------------------------------|------------------------------------------------------------------------------------------------------------------------------------------------------------------------------------------------------------------------------------------------------------------------------|-----------------------|
| Reporting of background should include      |                                                                                                                                                                                                                                                                              |                       |
| 1                                           | Problem definition                                                                                                                                                                                                                                                           | 5-6                   |
| 2                                           | Hypothesis statement (Objectives)                                                                                                                                                                                                                                            | 6                     |
| 3                                           | Description of study outcome(s)                                                                                                                                                                                                                                              | 6                     |
| 4                                           | Type of exposure or intervention used                                                                                                                                                                                                                                        | NA                    |
| 5                                           | Type of study designs used                                                                                                                                                                                                                                                   | 7                     |
| 6                                           | Study population                                                                                                                                                                                                                                                             | 7                     |
| Reporting of search strategy should include |                                                                                                                                                                                                                                                                              |                       |
| 7                                           | Qualifications of searchers (eg, librarians and investigators)                                                                                                                                                                                                               | NA                    |
| 8                                           | Search strategy, including time period included in the synthesis and key words                                                                                                                                                                                               | 7<br>S2 Table         |
| 9                                           | Effort to include all available studies, including contact with authors                                                                                                                                                                                                      | 7                     |
| 10                                          | Databases and registries searched                                                                                                                                                                                                                                            | 7                     |
| 11                                          | Search software used, name and version, including special features used (eg, explosion)                                                                                                                                                                                      | 7                     |
| 12                                          | Use of hand searching (eg, reference lists of obtained articles)                                                                                                                                                                                                             | 7                     |
| 13                                          | List of citations located and those excluded, including justification                                                                                                                                                                                                        | Fig 1                 |
| 14                                          | Method of addressing articles published in languages other than English                                                                                                                                                                                                      | 7                     |
| 15                                          | Method of handling abstracts and unpublished studies                                                                                                                                                                                                                         | 7, Fig 1              |
| 16                                          | Description of any contact with authors                                                                                                                                                                                                                                      | -                     |
| Reporting of methods should include         |                                                                                                                                                                                                                                                                              |                       |
| 17                                          | Description of relevance or appropriateness of studies assembled for assessing the hypothesis to be tested                                                                                                                                                                   | NA                    |
| 18                                          | Rationale for the selection and coding of data (eg, sound clinical principles or convenience)                                                                                                                                                                                | 7                     |
| 19                                          | Documentation of how data were classified and coded (eg, multiple raters, blinding and interrater reliability)                                                                                                                                                               | 6                     |
| 20                                          | Assessment of confounding (eg, comparability of cases and controls in studies where appropriate)                                                                                                                                                                             | NA                    |
| 21                                          | Assessment of study quality, including blinding of quality assessors, stratification or regression on possible predictors of study results                                                                                                                                   | Table 1,<br>S3 Table  |
| 22                                          | Assessment of heterogeneity                                                                                                                                                                                                                                                  | 9                     |
| 23                                          | Description of statistical methods (eg, complete description of fixed or random effects models, justification of whether the chosen models account for predictors of study results, dose-response models, or cumulative meta-analysis) in sufficient detail to be replicated | 8-9                   |
| 24                                          | Provision of appropriate tables and graphics                                                                                                                                                                                                                                 | Table 1-2,<br>Fig 1-4 |

| Reporting of results should include |                                                                     |                          |
|-------------------------------------|---------------------------------------------------------------------|--------------------------|
| 25                                  | Graphic summarizing individual study estimates and overall estimate | Fig 2-4                  |
| 26                                  | Table giving descriptive information for each study included        | Table 1                  |
| 27                                  | Results of sensitivity testing (eg, subgroup analysis)              | 13-14,<br>S9-11<br>Table |
| 28                                  | Indication of statistical uncertainty of findings                   | -                        |

**S2 Table. Search strategies**

| Electronic database | Search strategies                                                                                                                                                                                                                                                                                                                                                                                                                                                                                                                                                                                                                                                                                                                                                                                             |
|---------------------|---------------------------------------------------------------------------------------------------------------------------------------------------------------------------------------------------------------------------------------------------------------------------------------------------------------------------------------------------------------------------------------------------------------------------------------------------------------------------------------------------------------------------------------------------------------------------------------------------------------------------------------------------------------------------------------------------------------------------------------------------------------------------------------------------------------|
| PubMed              | ((((((((("glutathione S transferase") OR GST)) OR ("glutathione S-transferase T1" [Supplementary Concept] OR "glutathione S-transferase M1" [Supplementary Concept])) AND Humans[Mesh] AND English[lang])) OR (((("SLCO1B1 protein, human" [Supplementary Concept] OR "solute carrier organic anion transporter") AND Humans[Mesh] AND English[lang])) OR ("isoniazid acetyltransferase" [Supplementary Concept] OR "ArylamineN-Acetyltransferase"[Mesh] OR "NAT2 protein, human" [Supplementary Concept])) OR "Cytochrome P-450 CYP2E1"[Mesh] OR drug metaboli#er*) OR "Genetic Predisposition to Disease"[Mesh] AND (("Drug-Induced Liver Injury"[Mesh] OR "Drug-Induced Liver Injury, Chronic"[Mesh]))) AND (((("AntitubercularAgents"[Mesh]) OR tuberculosis OR antituberculo*)) Filters: Humans; English |
| EMBASE              | 'solute carrier organic anion transporter 1b1'/expOR 'solute carrier organic anion transporter 1' OR 'multidrug resistance protein 1'/expOR 'multidrug resistance protein 1' OR 'organic anion transporter'/expOR 'organic anion transporter' AND [humans]/limAND [english]/limOR slco1b1 OR 'drug transporter gene*' OR abcb1 AND ('hepatitis'/expOR hepatitis OR 'liver toxicity'/expOR ('drug induced' AND ('liver'/expOR liver) AND ('toxicity'/expOR toxicity)) OR 'toxic hepatitis'/expOR 'hepatotoxicity'/expOR hepatotoxicity) AND ('tuberculostaticagent'/expOR 'tuberculostaticagent' OR antituberculosisOR 'isoni*' OR 'rifampi*') AND [humans]/limAND [english]/lim                                                                                                                               |
| Web of Science      | ((((("Glutathione S transferase") OR GST) OR GSTT1) OR GSTM1) OR (((NAT2) OR "arylamineN acetyltransferase") OR N acetyltransferase*) OR ((drug metaboli?er*) OR (drug metabli?ingenzyme*)) OR ("Cytochrome 2E1") OR "CYP 2E1") OR ("The solute carrier organic anion transporter family member 1B1") OR SLCO1B1) OR (genotyp* OR acetylator*) OR (gene* susceptibilit*) OR (*polymorphism*) AND ((drug NEAR/3 liver) OR (hepatotoxi*) OR (drug induced liver injury) OR (hepatitis)) AND ((rifampi*) OR (isoni*) OR (antituberculosis) OR ("antitubercul* agent*"))                                                                                                                                                                                                                                          |
| Cochrane Reviews    | [AntitubercularAgents] explode all trees AND [Drug-Induced Liver Injury] explode all trees AND ([Cytochrome P-450 CYP2E1] explode all trees OR nat2 OR "N acetyltrasferase" "glutathione S transferase" OR GST OR GSTM1 OR GSTT1 "Solute carrier organic anion transporter" OR SLCO1B1)(Limitation : Trials)                                                                                                                                                                                                                                                                                                                                                                                                                                                                                                  |

**S3 Table. Study quality assessment**

| <b>Studies</b>                       | <b>Scientific design</b> | <b>Definite inclusion of study population<sup>a</sup></b> | <b>Explicit information on study population<sup>a</sup></b> | <b>Explicit diagnostic criteria on ATDILI<sup>a</sup></b> | <b>Genetic detection method<sup>a</sup></b> | <b>Correct statistical analysis<sup>a</sup></b> | <b>Logical discussion of study bias<sup>a</sup></b> |
|--------------------------------------|--------------------------|-----------------------------------------------------------|-------------------------------------------------------------|-----------------------------------------------------------|---------------------------------------------|-------------------------------------------------|-----------------------------------------------------|
| Feng, 2014 <sup>1</sup>              | 1                        | 1                                                         | 1                                                           | 1                                                         | 1                                           | 1                                               | 0                                                   |
| Kim, 2009 <sup>2</sup>               | 1                        | 1                                                         | 1                                                           | 1                                                         | 1                                           | 1                                               | 1                                                   |
| Singh, 2014 <sup>3</sup>             | 1                        | 1                                                         | 1                                                           | 1                                                         | 1                                           | 1                                               | 1                                                   |
| Tang, 2013 <sup>4</sup>              | 1                        | 1                                                         | 1                                                           | 1                                                         | 1                                           | 1                                               | 1                                                   |
| Ben Mahmoud, 2012 <sup>5</sup>       | 1                        | 1                                                         | 1                                                           | 1                                                         | 1                                           | 1                                               | 1                                                   |
| Bozok Cetintas, 2008 <sup>6</sup>    | 1                        | 1                                                         | 1                                                           | 1                                                         | 1                                           | 0                                               | 1                                                   |
| Higuchi, 2007 <sup>7</sup>           | 1                        | 1                                                         | 1                                                           | 1                                                         | 1                                           | 1                                               | 1                                                   |
| Ho, 2013 <sup>8</sup>                | 1                        | 1                                                         | 1                                                           | 1                                                         | 1                                           | 1                                               | 0                                                   |
| Huang, 2002 <sup>9</sup>             | 1                        | 1                                                         | 1                                                           | 1                                                         | 1                                           | 1                                               | 1                                                   |
| Khalili, 2011 <sup>10</sup>          | 1                        | 1                                                         | 1                                                           | 1                                                         | 1                                           | 1                                               | 0                                                   |
| Leiro-Fernandez, 2011 <sup>11</sup>  | 1                        | 1                                                         | 1                                                           | 1                                                         | 1                                           | 1                                               | 1                                                   |
| Lv, 2012 <sup>12</sup>               | 1                        | 1                                                         | 1                                                           | 1                                                         | 1                                           | 1                                               | 1                                                   |
| Ng, 2014 <sup>13</sup>               | 1                        | 1                                                         | 1                                                           | 1                                                         | 1                                           | 1                                               | 1                                                   |
| Ohno, 2000 <sup>14</sup>             | 1                        | 1                                                         | 1                                                           | 1                                                         | 1                                           | 1                                               | 1                                                   |
| Possuelo, 2008 <sup>15</sup>         | 1                        | 1                                                         | 1                                                           | 1                                                         | 1                                           | 1                                               | 1                                                   |
| Rana, 2012 <sup>16</sup>             | 1                        | 1                                                         | 1                                                           | 1                                                         | 1                                           | 1                                               | 1                                                   |
| Shimizu, 2006 <sup>17</sup>          | 1                        | 1                                                         | 1                                                           | 1                                                         | 1                                           | 1                                               | 0                                                   |
| Yuliwulandari, 2016 <sup>18</sup>    | 1                        | 1                                                         | 1                                                           | 1                                                         | 1                                           | 1                                               | 1                                                   |
| Wattanapokayakit, 2016 <sup>19</sup> | 1                        | 1                                                         | 1                                                           | 1                                                         | 1                                           | 1                                               | 1                                                   |
| Chatterjee, 2010 <sup>20</sup>       | 1                        | 1                                                         | 1                                                           | 1                                                         | 1                                           | 1                                               | 1                                                   |
| Gupta, 2013 <sup>21</sup>            | 1                        | 1                                                         | 1                                                           | 1                                                         | 1                                           | 1                                               | 1                                                   |
| Huang, 2007 <sup>22</sup>            | 1                        | 1                                                         | 1                                                           | 1                                                         | 1                                           | 1                                               | 0                                                   |
| Kim, 2010 <sup>23</sup>              | 1                        | 1                                                         | 1                                                           | 1                                                         | 1                                           | 1                                               | 1                                                   |
| Leiro, 2008 <sup>24</sup>            | 1                        | 1                                                         | 1                                                           | 1                                                         | 1                                           | 1                                               | 1                                                   |
| Liu, 2014 <sup>25</sup>              | 1                        | 1                                                         | 1                                                           | 1                                                         | 1                                           | 1                                               | 1                                                   |
| Monteiro, 2012 <sup>26</sup>         | 1                        | 1                                                         | 1                                                           | 1                                                         | 1                                           | 1                                               | 1                                                   |
| Rana, 2013 <sup>27</sup>             | 1                        | 1                                                         | 1                                                           | 1                                                         | 1                                           | 1                                               | 0                                                   |
| Roy, 2001 <sup>28</sup>              | 1                        | 1                                                         | 1                                                           | 1                                                         | 1                                           | 1                                               | 1                                                   |
| Chen, 2015 <sup>29</sup>             | 1                        | 1                                                         | 1                                                           | 1                                                         | 1                                           | 1                                               | 1                                                   |
| Kim, 2012 <sup>30</sup>              | 1                        | 1                                                         | 1                                                           | 1                                                         | 1                                           | 1                                               | 1                                                   |
| Li, 2012 <sup>31</sup>               | 1                        | 1                                                         | 1                                                           | 1                                                         | 1                                           | 1                                               | 1                                                   |
| An, 2012 <sup>32</sup>               | 1                        | 1                                                         | 1                                                           | 1                                                         | 1                                           | 1                                               | 1                                                   |
| Bose, 2011 <sup>33</sup>             | 1                        | 1                                                         | 1                                                           | 1                                                         | 1                                           | 1                                               | 1                                                   |

|                                        |   |   |   |   |   |   |   |
|----------------------------------------|---|---|---|---|---|---|---|
| Chamorro, 2013 <sup>34</sup>           | 1 | 1 | 1 | 1 | 1 | 1 | 1 |
| Cho, 2007 <sup>35</sup>                | 1 | 1 | 1 | 1 | 1 | 1 | 1 |
| Gupta, 2013 <sup>36</sup>              | 1 | 1 | 1 | 1 | 1 | 1 | 1 |
| Huang, 2003 <sup>37</sup>              | 1 | 1 | 1 | 1 | 1 | 1 | 1 |
| Lee, 2010 <sup>38</sup>                | 1 | 1 | 1 | 1 | 1 | 1 | 1 |
| Mishra, 2013 <sup>39</sup>             | 1 | 1 | 1 | 1 | 1 | 1 | 1 |
| Santos, 2013 <sup>40</sup>             | 1 | 1 | 1 | 1 | 1 | 1 | 1 |
| Vuilleumier, 2006 <sup>41</sup>        | 1 | 1 | 1 | 1 | 1 | 1 | 1 |
| Yamada, 2009 <sup>42</sup>             | 1 | 1 | 1 | 1 | 1 | 1 | 1 |
| Zaverucha-do-Valle, 2014 <sup>43</sup> | 1 | 1 | 1 | 1 | 1 | 1 | 0 |
| Sharma, 2014 <sup>44</sup>             | 1 | 1 | 1 | 1 | 1 | 1 | 1 |
| Wang, 2010 <sup>45</sup>               | 1 | 1 | 1 | 1 | 1 | 1 | 1 |
| Tang, 2012 <sup>46</sup>               | 1 | 1 | 1 | 1 | 1 | 1 | 1 |
| Yimer, 2011 <sup>47</sup>              | 1 | 1 | 1 | 1 | 1 | 1 | 0 |
| Brito, 2014 <sup>48</sup>              | 1 | 1 | 1 | 1 | 1 | 1 | 1 |
| Forestiero, 2013 <sup>49</sup>         | 1 | 1 | 1 | 1 | 1 | 1 | 0 |
| Rana, 2014 <sup>50</sup>               | 1 | 1 | 1 | 1 | 1 | 1 | 0 |
| Singla, 2014 <sup>51</sup>             | 1 | 1 | 1 | 1 | 1 | 1 | 1 |
| Sotsuka, 2011 <sup>52</sup>            | 1 | 1 | 1 | 1 | 1 | 1 | 1 |
| Teixeira, 2011 <sup>53</sup>           | 1 | 1 | 1 | 1 | 1 | 1 | 1 |
| Xiang, 2014 <sup>54</sup>              | 1 | 1 | 1 | 1 | 1 | 1 | 1 |

Abbreviation: ATDILI, anti-tuberculosis drug-induced liver injury

<sup>a</sup> 0 indicates 'not mentioned' in the study; 1 indicates 'sufficient information provided' in the study

**S4 Table. Genotype distribution and the genotyping method used for the *CYP2E1* genetic polymorphisms in the included studies (n = 26)**

| Study                    | <i>RsaI/PstI</i> genotype (n = 24) |               |                                     |               | <i>DraI</i> genotype (n = 6)     |           |                                     |            | Genotyping method |
|--------------------------|------------------------------------|---------------|-------------------------------------|---------------|----------------------------------|-----------|-------------------------------------|------------|-------------------|
|                          | Case (number of individuals [%])   |               | Control (number of individuals [%]) |               | Case (number of individuals [%]) |           | Control (number of individuals [%]) |            |                   |
|                          | C1/C1                              | C1/C2 + C2/C2 | C1/C1                               | C1/C2 + C2/C2 | D/D                              | D/C + C/C | D/D                                 | D/C + C/C  |                   |
| An <sup>32</sup>         | 72 (71.3)                          | 29 (28.7)     | 64 (59.8)                           | 43 (40.2)     | NA                               | NA        | NA                                  | NA         | Sequencing        |
| Bose <sup>33</sup>       | NA                                 | NA            | NA                                  | NA            | 4 (9.8)                          | 37 (90.2) | 32 (18.1)                           | 145 (81.9) | PCR-RFLP          |
| Brito <sup>48</sup>      | 13 (86.7)                          | 2 (13.3)      | 195 (84.8)                          | 35 (15.2)     | 12 (80.0)                        | 3 (20.0)  | 179 (76.8)                          | 54 (23.2)  | PCR-RFLP          |
| Chamorro <sup>34</sup>   | 30 (63.8)                          | 17 (36.2)     | 83 (64.8)                           | 45 (35.2)     | NA                               | NA        | NA                                  | NA         | PCR-RFLP          |
| Cho <sup>35</sup>        | 10 (55.6)                          | 8 (44.4)      | 65 (57.0)                           | 49 (43.0)     | NA                               | NA        | NA                                  | NA         | Sequencing        |
| Feng <sup>1</sup>        | 142 (82.1)                         | 31 (17.9)     | 90 (52.0)                           | 83 (48.0)     | NA                               | NA        | NA                                  | NA         | Sequencing        |
| Forestiero <sup>49</sup> | 53 (89.8)                          | 6 (10.2)      | 30 (75.0)                           | 10 (25.0)     | NA                               | NA        | NA                                  | NA         | PCR-RFLP          |
| Gupta <sup>36</sup>      | 49 (98.0)                          | 1 (2.0)       | 156 (94.5)                          | 9 (5.5)       | 33 (66.0)                        | 17 (34.0) | 107 (64.9)                          | 58 (35.1)  | PCR-RFLP          |
| Huang <sup>37</sup>      | 37 (75.5)                          | 12 (24.5)     | 148 (55.0)                          | 121 (45.0)    | NA                               | NA        | NA                                  | NA         | PCR-RFLP          |

|                           |           |           |            |            |           |           |            |            |            |
|---------------------------|-----------|-----------|------------|------------|-----------|-----------|------------|------------|------------|
| Kim <sup>2</sup>          | 54 (81.8) | 12 (18.2) | 97 (63.4)  | 56 (36.6)  | NA        | NA        | NA         | NA         | SNP stream |
| Lee <sup>55</sup>         | 26 (57.8) | 19 (42.2) | 55 (57.9)  | 40 (42.1)  | NA        | NA        | NA         | NA         | Taqman     |
| Mishra <sup>39</sup>      | 31 (93.9) | 2 (6.1)   | 168 (97.1) | 5 (2.9)    | NA        | NA        | NA         | NA         | PCR-RFLP   |
| Rana <sup>56</sup>        | 28 (50.9) | 27 (49.1) | 150 (61.2) | 95 (38.8)  | NA        | NA        | NA         | NA         | PCR-RFLP   |
| Santos <sup>57</sup>      | 15 (83.3) | 3 (16.7)  | 173 (75.6) | 56 (24.4)  | 15 (83.3) | 3 (16.7)  | 166 (72.8) | 62 (27.2)  | Taqman     |
| Sharma <sup>44</sup>      | 81 (77.1) | 24 (22.9) | 139 (75.1) | 46 (24.9)  | NA        | NA        | NA         | NA         | PCR-RFLP   |
| Singh <sup>3</sup>        | 42 (84.0) | 8 (16.0)  | 77 (56.6)  | 59 (43.4)  | NA        | NA        | NA         | NA         | PCR-RFLP   |
| Singla <sup>51</sup>      | 15 (88.0) | 2 (12.0)  | 375 (96.0) | 16 (4.0)   | NA        | NA        | NA         | NA         | PCR-RFLP   |
| Sotsuka <sup>52</sup>     | 11 (55.0) | 9 (45.0)  | 60 (65.2)  | 32 (34.8)  | 9 (45.0)  | 11 (55.0) | 45 (48.9)  | 47 (51.1)  | PCR-RFLP   |
| Tang <sup>46</sup>        | NA        | NA        | NA         | NA         | 47 (52.8) | 42 (47.2) | 204 (57.3) | 152 (42.7) | PCR-RFLP   |
| Tang <sup>4</sup>         | 56 (62.9) | 33 (37.1) | 225 (63.2) | 131 (36.8) | NA        | NA        | NA         | NA         | Taqman     |
| Teixeira <sup>53</sup>    | 23 (88.5) | 3 (11.5)  | 128 (90.8) | 13 (9.2)   | NA        | NA        | NA         | NA         | PCR-RFLP   |
| Vuilleumier <sup>41</sup> | 7 (87.5)  | 1 (12.5)  | 58 (92.1)  | 5 (7.9)    | NA        | NA        | NA         | NA         | PCR-RFLP   |

|                                  |           |           |             |            |    |    |    |    |                                            |
|----------------------------------|-----------|-----------|-------------|------------|----|----|----|----|--------------------------------------------|
| Wang <sup>45</sup>               | 82 (78.8) | 22 (21.2) | 71 (64.0)   | 40 (36.0)  | NA | NA | NA | NA | PCR-RFLP                                   |
| Xiang <sup>54</sup>              | 58 (82.9) | 12 (17.1) | 1264 (79.0) | 336 (21.0) | NA | NA | NA | NA | PCR/ligase<br>detection<br>reaction assays |
| Yamada <sup>42</sup>             | 17 (73.9) | 6 (26.1)  | 107 (72.8)  | 40 (27.2)  | NA | NA | NA | NA | PCR-RFLP                                   |
| Zaverucha-do-Valle <sup>43</sup> | 48 (94.1) | 3 (5.9)   | 74 (94.9)   | 4 (5.1)    | NA | NA | NA | NA | PCR-RFLP                                   |

---

Abbreviations: *NA*, not available; *PCR*, polymerase chain reaction; *RFLP*, restriction fragment length polymorphism; *SNP*, single nucleotide polymorphism



**S5 Table. Genotype distribution and the genotyping method used for the *NAT2* genetic polymorphism in the included studies (n = 35)**

| Study                       | Case (number of individuals [%]) |                                  | Control (number of individuals [%]) |                                  | Genotyping method  |
|-----------------------------|----------------------------------|----------------------------------|-------------------------------------|----------------------------------|--------------------|
|                             | Slow acetylator                  | Intermediate and fast acetylator | Slow acetylator                     | Intermediate and fast acetylator |                    |
| An <sup>32</sup>            | 40 (39.6)                        | 61 (60.4)                        | 13 (12.1)                           | 94 (87.9)                        | Sequencing         |
| Ben Mahmoud <sup>5</sup>    | 11 (78.5)                        | 3 (21.5)                         | 22 (42.4)                           | 30 (57.6)                        | PCR-RFLP           |
| Bose <sup>33</sup>          | 29 (70.7)                        | 12 (29.3)                        | 79 (44.6)                           | 98 (55.4)                        | PCR-RFLP           |
| Bozok Cetintas <sup>6</sup> | 23 (76.7)                        | 7 (23.3)                         | 19 (27.1)                           | 51 (72.9)                        | PCR                |
| Brito <sup>48</sup>         | 9 (60.0)                         | 6 (40.0)                         | 56 (24.3)                           | 174 (75.7)                       | PCR-RFLP           |
| Chamorro <sup>34</sup>      | 28 (58.7)                        | 19 (41.3)                        | 48 (37.5)                           | 80 (62.5)                        | PCR-RFLP           |
| Cho <sup>35</sup>           | 7 (38.9)                         | 11 (61.1)                        | 12 (10.5)                           | 102 (89.5)                       | Sequencing         |
| Forestiero <sup>49</sup>    | 28 (47.4)                        | 31 (52.6)                        | 13 (32.5)                           | 27 (67.5)                        | PCR-RFLP           |
| Gupta <sup>36</sup>         | 28 (56.0)                        | 22 (44.0)                        | 63 (38.2)                           | 102 (61.8)                       | PCR-RFLP           |
| Higuchi <sup>7</sup>        | 6 (33.3)                         | 12 (66.7)                        | 4 (4.9)                             | 78 (95.1)                        | PCR-RFLP           |
| Ho <sup>8</sup>             | 12 (63.2)                        | 7 (36.8)                         | 67 (20.4)                           | 262 (79.6)                       | Sequenom MassARRAY |

---

|                               |           |           |            |            |            |
|-------------------------------|-----------|-----------|------------|------------|------------|
| Huang <sup>9</sup>            | 14 (42.4) | 19 (57.6) | 39 (20.4)  | 152 (79.6) | PCR-RFLP   |
| Huang <sup>37</sup>           | 19 (38.8) | 30 (61.2) | 58 (21.6)  | 211 (78.4) | PCR-RFLP   |
| Khalili <sup>10</sup>         | 9 (64.3)  | 5 (35.7)  | 5 (13.9)   | 31 (86.1)  | PCR-RFLP   |
| Lee <sup>38</sup>             | 21 (46.7) | 24 (53.3) | 20 (21.1)  | 75 (78.9)  | Taqman     |
| Leiro-Fernandez <sup>11</sup> | 36 (72.0) | 14 (28.0) | 44 (65.7)  | 23 (34.3)  | PCR-RFLP   |
| Lv <sup>58</sup>              | 18 (20.2) | 71 (79.8) | 74 (20.8)  | 282 (79.2) | PCR-RFLP   |
| Mishra <sup>39</sup>          | 23 (70.0) | 10 (30.0) | 73 (42.0)  | 100 (58.0) | PCR-RFLP   |
| Ng <sup>13</sup>              | 22 (84.6) | 4 (15.4)  | 57 (56.4)  | 44 (43.6)  | PCR-RFLP   |
| Ohno <sup>14</sup>            | 7 (50.0)  | 7 (50.0)  | 0 (0.0)    | 63 (100.0) | PCR-RFLP   |
| Possuelo <sup>15</sup>        | 9 (64.3)  | 5 (35.7)  | 60 (25.0)  | 180 (75.0) | Sequencing |
| Rana <sup>16</sup>            | 19 (38.0) | 31 (62.0) | 30 (14.9)  | 171 (85.1) | PCR-RFLP   |
| Rana <sup>50</sup>            | 21 (38.2) | 34 (61.8) | 36 (14.7)  | 209 (85.3) | PCR-RFLP   |
| Santos <sup>40</sup>          | 11 (61.1) | 7 (38.9)  | 75 (29.8)  | 177 (70.2) | Sequencing |
| Shimizu <sup>17</sup>         | 4 (40.0)  | 6 (60.0)  | 1 (3.1)    | 31 (96.9)  | PCR-RFLP   |
| Singla <sup>51</sup>          | 15 (88.2) | 2 (11.8)  | 213 (54.5) | 178 (45.5) | PCR-RFLP   |

---

|                                  |           |           |            |             |                                      |
|----------------------------------|-----------|-----------|------------|-------------|--------------------------------------|
| Sotsuka <sup>52</sup>            | 8 (15.4)  | 44 (84.6) | 5 (5.4)    | 87 (94.6)   | PCR-RFLP                             |
| Teixeira <sup>53</sup>           | 18 (75.0) | 6 (25.0)  | 64 (51.2)  | 61 (48.8)   | Sequencing                           |
| Vuilleumier <sup>41</sup>        | 3 (37.5)  | 5 (62.5)  | 8 (12.7)   | 55 (87.3)   | PCR-RFLP                             |
| Wattanapokayakit <sup>19</sup>   | 38 (71.7) | 15 (28.3) | 15 (17.7)  | 70 (82.3)   | Sequencing                           |
| Xiang <sup>54</sup>              | 28 (31.5) | 61 (68.5) | 501 (23.2) | 1654 (76.8) | PCR/ligase detection reaction assays |
| Yamada <sup>42</sup>             | 14 (60.9) | 9 (39.1)  | 64 (43.5)  | 83 (56.5)   | Sequencing                           |
| Yimer <sup>47</sup>              | 31 (75.6) | 10 (24.4) | 107 (66.9) | 53 (33.1)   | Taqman                               |
| Yuliwulandari <sup>18</sup>      | 32 (64.0) | 18 (36.0) | 65 (34.0)  | 126 (66.0)  | Sequencing                           |
| Zaverucha-do-Valle <sup>43</sup> | 37 (71.2) | 15 (28.8) | 36 (45.6)  | 43 (54.4)   | Sequencing                           |

Abbreviations: *NA*, not available; *PCR*, polymerase chain reaction; *RFLP*, restriction fragment length polymorphism

**S6 Table. Genotype distribution and the genotyping method used for the *GST* genetic polymorphisms in the included studies (n = 19)**

| Study                    | <i>GSTM1</i> genotype (n = 19)   |              |                                     |               | <i>GSTT1</i> genotype (n = 17)   |              |                                     |               | <i>GSTM1/GSTT1</i> genotype (n = 11) |               |                                     |               | Genotyping method |
|--------------------------|----------------------------------|--------------|-------------------------------------|---------------|----------------------------------|--------------|-------------------------------------|---------------|--------------------------------------|---------------|-------------------------------------|---------------|-------------------|
|                          | Case (number of individuals [%]) |              | Control (number of individuals [%]) |               | Case (number of individuals [%]) |              | Control (number of individuals [%]) |               | Case (number of individuals [%])     |               | Control (number of individuals [%]) |               |                   |
|                          | Null                             | Non-null     | Null                                | Non-null      | Null                             | Non-null     | Null                                | Non-null      | Dual-null                            | One-/non-null | Dual-null                           | One-/non-null |                   |
| Brito <sup>48</sup>      | 6<br>(40.0)                      | 9<br>(60.0)  | 99<br>(43.0)                        | 131<br>(57.0) | 2<br>(13.3)                      | 13<br>(86.7) | 28<br>(12.2)                        | 202<br>(87.8) | 1<br>(6.7)                           | 14<br>(93.3)  | 12<br>(5.2)                         | 218<br>(94.8) | PCR               |
| Chatterjee <sup>20</sup> | 25<br>(49.0)                     | 26<br>(51.0) | 49<br>(49.0)                        | 51<br>(51.0)  | 3<br>(5.9)                       | 48<br>(94.1) | 3<br>(3.0)                          | 97<br>(97.0)  | 3<br>(5.9)                           | 48<br>(94.1)  | 11<br>(11.0)                        | 89<br>(89.0)  | Multiplex<br>PCR  |
| Forestiero <sup>49</sup> | 25<br>(42.4)                     | 34<br>(57.6) | 21<br>(52.5)                        | 19<br>(47.5)  | 10<br>(17.0)                     | 49<br>(83.0) | 8<br>(20.0)                         | 32<br>(80.0)  | 4<br>(6.8)                           | 55<br>(93.2)  | 5<br>(12.5)                         | 35<br>(87.5)  | Multiplex<br>PCR  |
| Gupta <sup>21</sup>      | 21<br>(42.0)                     | 29<br>(58.0) | 61<br>(24.8)                        | 185<br>(75.2) | 11<br>(22.0)                     | 39<br>(78.0) | 30<br>(12.2)                        | 216<br>(87.8) | 5<br>(10.0)                          | 45<br>(90.0)  | 4<br>(1.6)                          | 242<br>(98.4) | Multiplex<br>PCR  |
| Huang <sup>22</sup>      | 42<br>(66.7)                     | 21<br>(33.3) | 29<br>(46.0)                        | 34<br>(54.0)  | 24<br>(38.1)                     | 39<br>(61.9) | 25<br>(39.7)                        | 38<br>(60.3)  | NA                                   | NA            | NA                                  | NA            | Multiplex<br>PCR  |
| Kim <sup>23</sup>        | 26<br>(45.6)                     | 31<br>(54.4) | 104<br>(54.7)                       | 86<br>(45.3)  | 34<br>(59.6)                     | 23<br>(40.4) | 103<br>(54.2)                       | 87<br>(45.8)  | 17<br>(29.8)                         | 40<br>(70.2)  | 56<br>(29.6)                        | 133<br>(70.4) | PCR               |
| Leiro <sup>24</sup>      | 12<br>(34.3)                     | 23<br>(65.7) | 25<br>(41.7)                        | 35<br>(58.3)  | 17<br>(48.6)                     | 18<br>(51.4) | 16<br>(26.7)                        | 44<br>(73.3)  | 7<br>(20.0)                          | 28<br>(80.0)  | 6<br>(10.0)                         | 54<br>(90.0)  | PCR               |
| Liu <sup>25</sup>        | 14<br>(70.0)                     | 6<br>(30.0)  | 96<br>(67.1)                        | 47<br>(32.9)  | 13<br>(65.0)                     | 7<br>(35.0)  | 97<br>(67.8)                        | 46<br>(32.2)  | NA                                   | NA            | NA                                  | NA            | Multiplex<br>PCR  |

|                        |              |              |               |                |              |              |               |                |              |              |               |                |                  |
|------------------------|--------------|--------------|---------------|----------------|--------------|--------------|---------------|----------------|--------------|--------------|---------------|----------------|------------------|
| Monteiro <sup>26</sup> | 21<br>(35.6) | 38<br>(64.4) | 34<br>(28.8)  | 84<br>(71.2)   | 11<br>(18.7) | 48<br>(81.3) | 28<br>(23.8)  | 90<br>(76.2)   | NA           | NA           | NA            | NA             | PCR              |
| Rana <sup>27</sup>     | 10<br>(41.6) | 20<br>(58.4) | 37<br>(18.5)  | 183<br>(81.5)  | 6<br>(25.0)  | 24<br>(75.0) | 68<br>(33.8)  | 152<br>(66.2)  | 9<br>(37.5)  | 21<br>(62.5) | 96<br>(47.7)  | 124<br>(52.3)  | PCR              |
| Rana <sup>16</sup>     | 19<br>(34.5) | 36<br>(65.5) | 42<br>(17.1)  | 203<br>(82.9)  | 14<br>(25.5) | 41<br>(74.5) | 81<br>(33.1)  | 164<br>(66.9)  | 22<br>(40.0) | 33<br>(60.0) | 122<br>(49.8) | 123<br>(50.2)  | PCR              |
| Roy <sup>28</sup>      | 17<br>(52.0) | 15<br>(48.0) | 8<br>(24.0)   | 25<br>(76.0)   | 5<br>(15.0)  | 28<br>(85.0) | 1<br>(3.0)    | 32<br>(97.0)   | NA           | NA           | NA            | NA             | PCR              |
| Sharma <sup>44</sup>   | 42<br>(40.0) | 63<br>(60.0) | 68<br>(36.7)  | 117<br>(63.3)  | NA           | NA           | NA            | NA             | NA           | NA           | NA            | NA             | PCR              |
| Singla <sup>51</sup>   | 10<br>(59.0) | 7<br>(41.0)  | 165<br>(42.0) | 226<br>(58.0)  | 8<br>(47.0)  | 9<br>(53.0)  | 102<br>(26.0) | 289<br>(74.0)  | 5<br>(29.0)  | 12<br>(71.0) | 32<br>(8.0)   | 359<br>(92.0)  | Multiplex<br>PCR |
| Sotsuka <sup>52</sup>  | 12<br>(60.0) | 8<br>(40.0)  | 50<br>(54.3)  | 42<br>(45.7)   | 7<br>(35.0)  | 13<br>(65.0) | 40<br>(43.5)  | 52<br>(56.5)   | NA           | NA           | NA            | NA             | PCR              |
| Tang <sup>46</sup>     | 55<br>(61.8) | 34<br>(38.2) | 203<br>(57.0) | 153<br>(43.0)  | 40<br>(44.9) | 49<br>(55.1) | 164<br>(46.1) | 192<br>(53.9)  | 22<br>(24.7) | 67<br>(75.3) | 94<br>(26.4)  | 262<br>(73.6)  | Multiplex<br>PCR |
| Teixeira <sup>53</sup> | 11<br>(42.3) | 15<br>(57.7) | 61<br>(43.3)  | 80<br>(56.7)   | 4<br>(15.4)  | 22<br>(84.6) | 27<br>(19.2)  | 114<br>(80.8)  | NA           | NA           | NA            | NA             | Multiplex<br>PCR |
| Wang <sup>45</sup>     | 63<br>(60.6) | 41<br>(39.4) | 54<br>(48.6)  | 57<br>(51.4)   | NA           | NA           | NA            | NA             | NA           | NA           | NA            | NA             | PCR              |
| Xiang <sup>54</sup>    | 41<br>(46.1) | 48<br>(53.9) | 925<br>(42.9) | 1230<br>(57.1) | 18<br>(20.2) | 71<br>(79.8) | 477<br>(22.1) | 1678<br>(77.9) | 7<br>(9.3)   | 68<br>(90.7) | 283<br>(16.5) | 1427<br>(83.5) | PCR              |

Abbreviations: *NA*, not available; *PCR*, polymerase chain reaction

**S7 Table. Genotype distribution and the genotyping method used for the *SLCO1B1* genetic polymorphisms in the included studies (n = 4)**

| Study               | <i>SLCO1B1</i> 388A>G (rs2306283) |              |              |                                     |               |               | <i>SLCO1B1</i> 521T>C (rs4149056) |              |            |                                     |              |            | Genotyping method     |
|---------------------|-----------------------------------|--------------|--------------|-------------------------------------|---------------|---------------|-----------------------------------|--------------|------------|-------------------------------------|--------------|------------|-----------------------|
|                     | Case (number of individuals [%])  |              |              | Control (number of individuals [%]) |               |               | Case (number of individuals [%])  |              |            | Control (number of individuals [%]) |              |            |                       |
|                     | AA                                | AG           | GG           | AA                                  | AG            | GG            | TT                                | CT           | CC         | TT                                  | CT           | CC         |                       |
| Chen <sup>29</sup>  | 8<br>(9.0)                        | 34<br>(38.2) | 47<br>(52.8) | 33<br>(7.5)                         | 164<br>(37.1) | 245<br>(55.4) | 72<br>(80.9)                      | 15<br>(16.9) | 2<br>(2.2) | 351<br>(79.6)                       | 87<br>(19.7) | 3<br>(0.7) | Taqman                |
| Kim <sup>30</sup>   | 6<br>(9.2)                        | 26<br>(40.0) | 33<br>(50.8) | 11<br>(7.1)                         | 60<br>(38.5)  | 85<br>(54.5)  | 46<br>(69.7)                      | 20<br>(30.3) | 0<br>(0.0) | 113<br>(72.4)                       | 40<br>(25.6) | 3<br>(1.9) | SNPstream             |
| Li <sup>31</sup>    | 11<br>(9.3)                       | 38<br>(32.2) | 69<br>(58.5) | 12<br>(7.7)                         | 48<br>(31.0)  | 95<br>(61.3)  | 83<br>(70.3)                      | 34<br>(28.8) | 1<br>(0.8) | 136<br>(87.7)                       | 18<br>(11.6) | 1<br>(0.7) | PCR direct sequencing |
| Yimer <sup>47</sup> | 9<br>(22.0)                       | 17<br>(41.5) | 15<br>(36.6) | 20<br>(12.5)                        | 87<br>(54.4)  | 53<br>(33.1)  | 27<br>(65.9)                      | 13<br>(31.7) | 1<br>(2.4) | 107<br>(66.9)                       | 49<br>(30.6) | 4<br>(2.5) | Taqman                |

Abbreviations: *PCR*, polymerase chain reaction; *SNP*, single nucleotide polymorphism

**(A) CYP2E1 RsaI/PstI polymorphism**

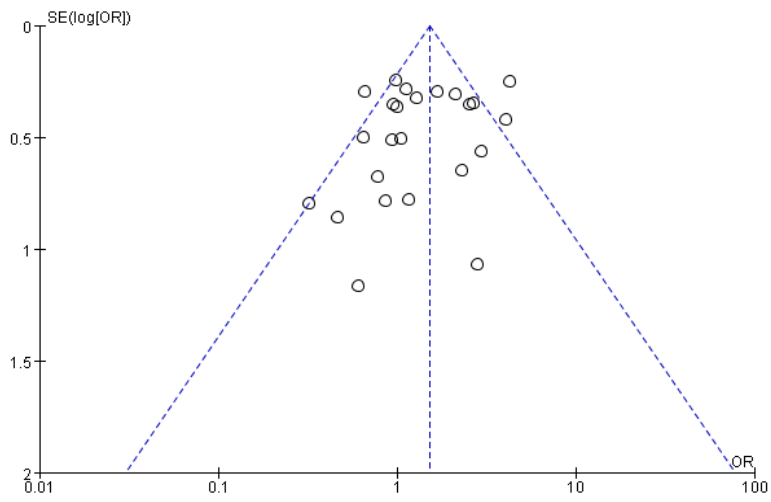

**(B) CYP2E1 DraI polymorphism**

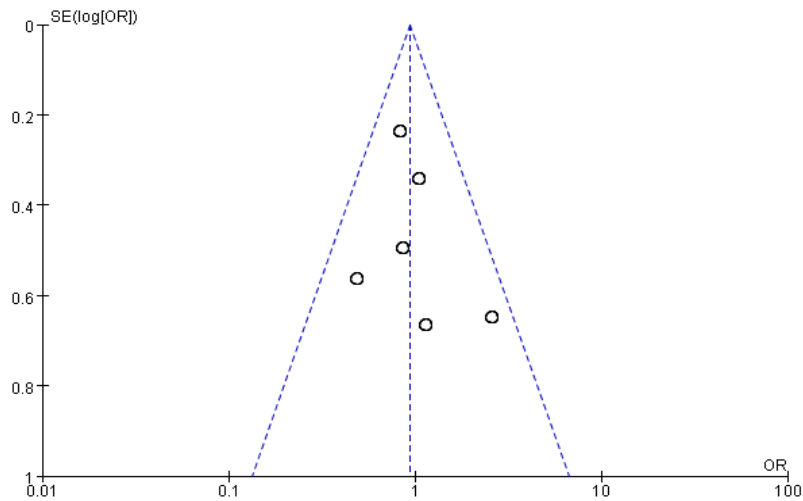

**(C) NAT2 polymorphism**

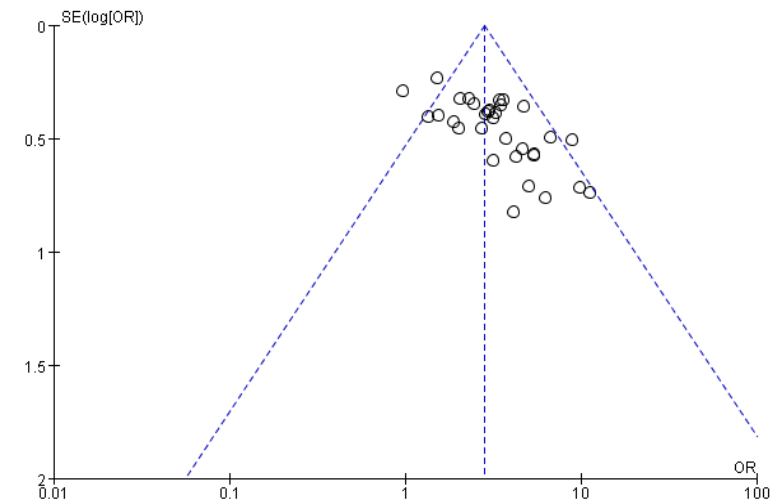

**(D) *GSTM1* polymorphism**

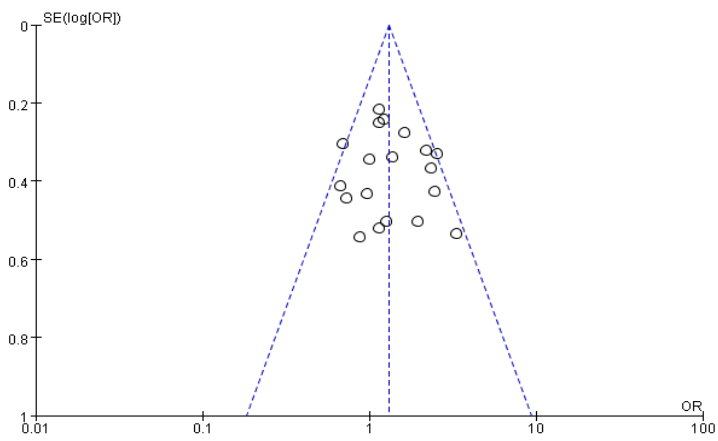

**(E) *GSTT1* polymorphism**

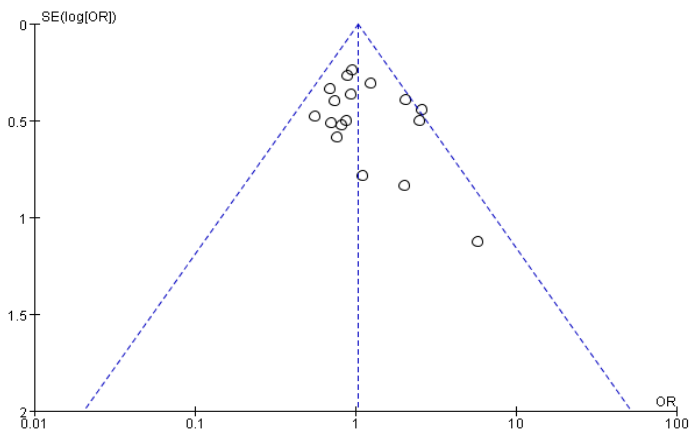

**(F) *GSTT1/M1* polymorphism**

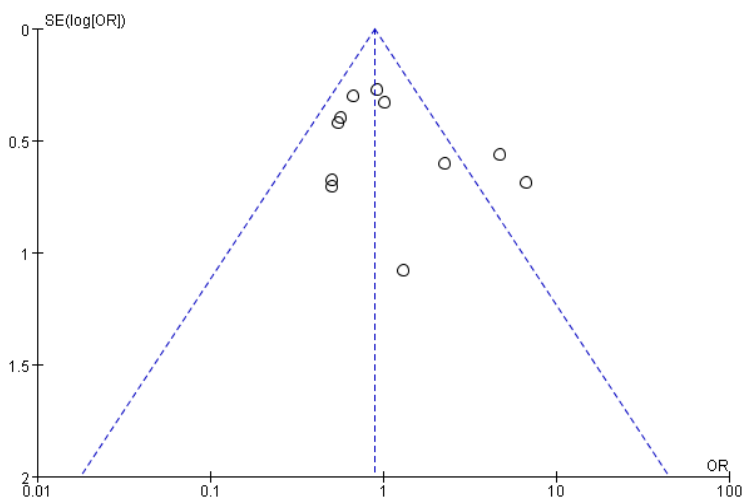



**(G) *SLCO1B1* 388A>G and 521T>C polymorphism**

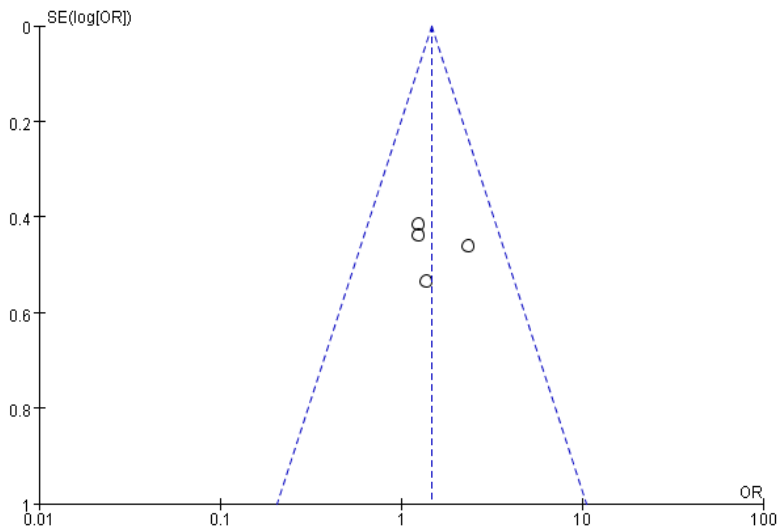

**S8 Figure.** Funnel plots to evaluate publication bias for the *CYP2E1*, *NAT2*, *GST*, and *SLCO1B1* polymorphisms associated with the risk of anti-tuberculosis drug-induced liver injury. (A) *CYP2E1* *RsaI/PstI* polymorphism, (B) *CYP2E1* *DraI* polymorphism, (C) *NAT2* polymorphism, (D) *GSTM1* polymorphism, (E) *GSTT1* polymorphism, (F) *GSTT1/M1* polymorphism, and (G) *SLCO1B1* 388A>G and 521T>C polymorphism.

**S9 Table. Subgroup analysis for the association between *CYP2E1* polymorphisms and the risk of anti-tuberculosis drug-induced liver injury based on ethnicity, anti-tuberculosis drug regimen, and study design**

| Polymorphic gene                                      | Subgroup             | Number of studies | Case/control (n) | Test of association |                      | Model of meta-analysis | Test of heterogeneity |                      |        |
|-------------------------------------------------------|----------------------|-------------------|------------------|---------------------|----------------------|------------------------|-----------------------|----------------------|--------|
|                                                       |                      |                   |                  | OR [95% CI]         | P value <sup>a</sup> |                        | I <sup>2</sup> , %    | P value <sup>b</sup> |        |
| <i>CYP2E1 RsaI/PstI</i><br>(c1/c1 vs. c1/c2 + c2/c2)  | Total                | 24                | 1293/5450        | 1.39 [1.06, 1.83]   | 0.02                 | Random                 | 60                    | <0.0001              |        |
|                                                       | Ethnicity            | East Asian        | 10               | 736/3076            | 1.62 [1.12, 2.36]    | 0.01                   | Random                | 69                   | 0.0006 |
|                                                       |                      | Indian            | 6                | 310/1295            | 1.08 [0.52, 2.25]    | 0.85                   | Random                | 70                   | 0.005  |
|                                                       |                      | South American    | 6                | 216/869             | 1.30 [0.83, 2.03]    | 0.25                   | Fixed                 | 0                    | 0.49   |
|                                                       |                      | Others            | 2                | 31/210              | 0.98 [0.39, 2.45]    | 0.96                   | Fixed                 | 0                    | 0.66   |
|                                                       | Anti-TB drug regimen | INH alone         | 2                | 31/210              | 0.98 [0.39, 2.45]    | 0.96                   | Fixed                 | 0                    | 0.66   |
|                                                       |                      | Combination       | 21               | 1212/5104           | 1.35 [1.01, 1.79]    | <0.00001               | Random                | 61                   | 0.0002 |
|                                                       | Study design         | Cohort            | 11               | 564/3120            | 1.32 [0.94, 1.87]    | 0.11                   | Random                | 50                   | 0.03   |
|                                                       |                      | Case-control      | 12               | 729/2330            | 1.42 [0.93, 2.16]    | 0.10                   | Random                | 65                   | 0.0006 |
| <i>CYP2E1 DraI<sup>c</sup></i><br>(D/D vs. D/C + C/C) | Total                | 6                 | 233/1272         | 0.93 [0.68, 1.27]   | 0.64                 | Fixed                  | 0                     | 0.51                 |        |
|                                                       | Ethnicity            | East Asian        | 2                | 109/448             | 0.84 [0.55, 1.28]    | 0.41                   | Fixed                 | 0                    | 0.96   |
|                                                       |                      | Indian            | 2                | 91/342              | 0.83 [0.48, 1.45]    | 0.51                   | Fixed                 | 27                   | 0.24   |
|                                                       |                      | South American    | 2                | 33/482              | 1.80 [0.73, 4.45]    | 0.20                   | Fixed                 | 0                    | 0.37   |
|                                                       | Study design         | Cohort            | 2                | 56/407              | 0.68 [0.31, 1.50]    | 0.33                   | Fixed                 | 0                    | 0.33   |
|                                                       |                      | Case-control      | 4                | 177/865             | 0.99 [0.70, 1.38]    | 0.94                   | Fixed                 | 0                    | 0.42   |

Abbreviations: *CI*, confidence interval; *CYP2E1*, cytochrome P450 2E1; *INH*, isoniazid; *OR*, odds ratio; *TB*, tuberculosis

<sup>a</sup> P value from Z test

<sup>b</sup> P value from Cochran's Q test based on chi-square statistic

<sup>c</sup> Subgroup analysis based on anti-TB drug regimen could not be performed due to insufficient information provided.

**S10 Table. Subgroup analysis for the association between *NAT2* polymorphism and the risk of anti-tuberculosis drug-induced liver injury based on ethnicity, anti-tuberculosis drug regimen, and study design**

| Polymorphic gene                                                      | Subgroup             | Number of studies | Case/control (n) | Test of association |                      | Model of meta-analysis | Test of heterogeneity |                      |          |
|-----------------------------------------------------------------------|----------------------|-------------------|------------------|---------------------|----------------------|------------------------|-----------------------|----------------------|----------|
|                                                                       |                      |                   |                  | OR [95% CI]         | P value <sup>a</sup> |                        | I <sup>2</sup> , %    | P value <sup>b</sup> |          |
| <i>NAT2</i><br>(Slow acetylator vs. fast and intermediate acetylator) | Total                | 35                | 1323/7319        | 3.30 [2.65, 4.11]   | <0.00001             | Random                 | 47                    | 0.002                |          |
|                                                                       | Ethnicity            | East Asian        | 13               | 590/3970            | 4.00 [2.42, 6.60]    | <0.00001               | Random                | 77                   | <0.00001 |
|                                                                       |                      | Indian            | 6                | 246/1352            | 3.07 [2.26, 4.16]    | <0.00001               | Fixed                 | 0                    | 0.74     |
|                                                                       |                      | West Asian        | 2                | 44/106              | 9.51 [4.19, 21.61]   | <0.00001               | Fixed                 | 0                    | 0.79     |
|                                                                       |                      | South American    | 7                | 231/1110            | 2.94 [2.11, 4.08]    | <0.00001               | Fixed                 | 0                    | 0.75     |
|                                                                       |                      | African           | 2                | 55/212              | 2.08 [1.06, 4.10]    | 0.03                   | Fixed                 | 52                   | 0.15     |
|                                                                       |                      | Others            | 5                | 157/569             | 2.56 [1.72, 3.79]    | <0.00001               | Fixed                 | 15                   | 0.32     |
|                                                                       | Anti-TB drug regimen | INH alone         | 2                | 31/210              | 2.32 [1.05, 5.13]    | 0.04                   | Fixed                 | 0                    | 0.45     |
|                                                                       |                      | Combination       | 32               | 1256/6954           | 3.37 [2.67, 4.25]    | <0.00001               | Random                | 56                   | <0.0001  |
|                                                                       |                      | Cohort            | 18               | 673/4850            | 2.82 [2.35, 3.40]    | <0.00001               | Fixed                 | 40                   | 0.04     |
| Study design                                                          | Case-control         | 17                | 650/2469         | 3.53 [2.42, 5.16]   | <0.00001             | Random                 | 65                    | 0.0001               |          |

Abbreviations: *CI*, confidence interval; *INH*, isoniazid; *NAT2*, N-acetyltransferase 2; *OR*, odds ratio; *TB*, tuberculosis

<sup>a</sup> P value from Z test

<sup>b</sup> P value from Cochran's Q test based on chi-square statistic

**S11 Table. Subgroup analysis for the association between *GST* polymorphisms and the risk of anti-tuberculosis drug-induced liver injury based on ethnicity, anti-tuberculosis drug regimen, and study design**

| Polymorphic gene                                                 | Subgroup     | Number of studies | Case/control (n) | Test of association |                      | Model of meta-analysis | Test of heterogeneity |                      |        |
|------------------------------------------------------------------|--------------|-------------------|------------------|---------------------|----------------------|------------------------|-----------------------|----------------------|--------|
|                                                                  |              |                   |                  | OR [95% CI]         | P value <sup>a</sup> |                        | I <sup>2</sup> , %    | P value <sup>b</sup> |        |
| <i>GSTM1</i> <sup>c</sup><br>(null vs. non-null)                 | Total        | 19                | 977/5119         | 1.30 [1.12, 1.52]   | 0.0007               | Fixed                  | 33                    | 0.08                 |        |
|                                                                  | Ethnicity    | East Asian        | 7                | 442/3110            | 1.23 [0.99, 1.54]    | 0.06                   | Fixed                 | 23                   | 0.25   |
|                                                                  |              | Indian            | 7                | 341/1420            | 1.68 [1.30, 2.19]    | <0.0001                | Fixed                 | 36                   | 0.15   |
|                                                                  |              | Brazilian         | 4                | 159/529             | 0.98 [0.66, 1.47]    | 0.94                   | Fixed                 | 0                    | 0.60   |
|                                                                  | Study design | Cohort            | 8                | 462/3439            | 1.41 [1.04, 1.93]    | 0.03                   | Random                | 44                   | 0.08   |
| Case-control                                                     |              | 11                | 515/1680         | 1.25 [1.01, 1.55]   | 0.20                 | Fixed                  | 29                    | 0.17                 |        |
| <i>GSTT1</i> <sup>c</sup><br>(null vs. non-null)                 | Total        | 17                | 768/4823         | 1.03 [0.85, 1.25]   | 0.76                 | Fixed                  | 16                    | 0.26                 |        |
|                                                                  | Ethnicity    | East Asian        | 6                | 338/2999            | 0.96 [0.74, 1.24]    | 0.75                   | Fixed                 | 0                    | 0.94   |
|                                                                  |              | Indian            | 6                | 236/1235            | 1.37 [0.72, 2.59]    | 0.33                   | Random                | 57                   | 0.04   |
|                                                                  |              | Brazilian         | 4                | 159/529             | 0.80 [0.47, 1.33]    | 0.39                   | Fixed                 | 0                    | 0.97   |
|                                                                  | Study design | Cohort            | 8                | 408/3354            | 0.89 [0.67, 1.19]    | 0.44                   | Fixed                 | 3                    | 0.41   |
| Case-control                                                     |              | 9                 | 360/1469         | 1.16 [0.90, 1.50]   | 0.26                 | Fixed                  | 24                    | 0.23                 |        |
| <i>GSTM1/GSTT1</i> <sup>c</sup><br>(dual-null vs. one-/non-null) | Total        | 11                | 547/4233         | 1.05 [0.67, 1.62]   | 0.84                 | Random                 | 59                    | 0.006                |        |
|                                                                  | Ethnicity    | East Asian        | 3                | 235/2701            | 0.83 [0.58, 1.20]    | 0.33                   | Fixed                 | 0                    | 0.49   |
|                                                                  |              | Indian            | 5                | 203/1202            | 1.33 [0.50, 3.53]    | 0.56                   | Random                | 80                   | 0.0005 |
|                                                                  |              | Brazilian         | 2                | 74/270              | 0.67 [0.20, 2.18]    | 0.50                   | Fixed                 | 0                    | 0.47   |
|                                                                  | Study design | Cohort            | 6                | 298/3136            | 0.85 [0.45, 1.61]    | 0.62                   | Random                | 58                   | 0.04   |
| Case-control                                                     |              | 5                 | 249/1097         | 1.31 [0.71, 2.43]   | 0.39                 | Random                 | 59                    | 0.04                 |        |

Abbreviations: *CI*, confidence interval; *GSTM1*, glutathione S-transferase Mu 1; *GSTT1*, glutathione S-transferase Theta 1; *OR*, odds ratio

<sup>a</sup> P value from Z test

<sup>b</sup> P value from Cochran's Q test based on chi-square statistic

<sup>c</sup> Subgroup analysis based on anti-tuberculosis drug regimen could not be performed due to insufficient information provided

## References

1. Feng FM, Guo M, Chen Y, *et al.* Genetic polymorphisms in metabolic enzymes and susceptibility to anti-tuberculosis drug-induced hepatic injury. *Genetics and Molecular Research* 2014;13:9463-71.
2. Kim SH, Kim SH, Bahn JW, *et al.* Genetic polymorphisms of drug-metabolizing enzymes and anti-TB drug-induced hepatitis. *Pharmacogenomics* 2009;10:1767-79.
3. Singh M, Gupta VH, Amarapurkar DN, *et al.* Association of genetic variants with anti-tuberculosis drug induced hepatotoxicity: A high resolution melting analysis. *Infection Genetics and Evolution* 2014;23:42-8.
4. Tang S, Lv X, Zhang Y, *et al.* Cytochrome P450 2E1 Gene Polymorphisms/Haplotypes and Anti-Tuberculosis Drug-Induced Hepatitis in a Chinese Cohort. *PLoS ONE* 2013;8:e57526.
5. Ben Mahmoud L, Ghozzi H, Kamoun A, *et al.* Polymorphism of the N-acetyltransferase 2 gene as a susceptibility risk factor for antituberculosis drug-induced hepatotoxicity in Tunisian patients with tuberculosis. *Pathologie Biologie* 2012;60:324-30.
6. Bozok Cetintas V, Erer OF, Kosova B, *et al.* Determining the relation between N-acetyltransferase-2 acetylator phenotype and antituberculosis drug induced hepatitis by molecular biologic tests. *Tuberk Toraks* 2008;56:81-6.
7. Higuchi N, Tahara N, Yanagihara K, *et al.* NAT2 6A, a haplotype of the N-acetyltransferase 2 gene, is an important biomarker for risk of anti-tuberculosis drug-induced hepatotoxicity in Japanese patients with tuberculosis. *World J Gastroenterol* 2007;13:6003-8.
8. Ho HT, Wang TH, Hsiong CH, *et al.* The NAT2 tag SNP rs1495741 correlates with the susceptibility of antituberculosis drug-induced hepatotoxicity. *Pharmacogenet Genomics* 2013;23:200-7.
9. Huang YS, Chern HD, Su WJ, *et al.* Polymorphism of the N-acetyltransferase 2 gene as a susceptibility risk factor for antituberculosis drug-induced hepatitis. *Hepatology* 2002;35:883-9.
10. Khalili H, Fouladdel S, Sistanizad M, *et al.* Association of N-acetyltransferase-2 genotypes and anti-tuberculosis induced liver injury: First case-controlled study from Iran. *Current Drug Safety* 2011;6:17-22.
11. Leiro-Fernandez V, Valverde D, Vazquez-Gallardo R, *et al.* N-acetyltransferase 2 polymorphisms and risk of anti-tuberculosis drug-induced hepatotoxicity in Caucasians. *International Journal of Tuberculosis and Lung Disease* 2011;15:1403-8.
12. Lv X, Tang S, Xia Y, *et al.* NAT2 genetic polymorphisms and anti-tuberculosis drug-induced hepatotoxicity in Chinese community population. *Ann Hepatol* 2012;11:700-7.
13. Ng CS, Hasnat A, Al Maruf A, *et al.* N-acetyltransferase 2 (NAT2) genotype as a risk factor for development of drug-induced liver injury relating to antituberculosis drug treatment in a mixed-ethnicity patient group. *European Journal of Clinical Pharmacology* 2014;70:1079-86.
14. Ohno M, Yamaguchi I, Yamamoto I, *et al.* Slow N-acetyltransferase 2 genotype affects the incidence of isoniazid and rifampicin-induced hepatotoxicity. *International Journal of Tuberculosis and Lung Disease* 2000;4:256-61.

15. Possuelo LG, Castelan JA, de Brito TC, *et al.* Association of slow N-acetyltransferase 2 profile and anti-TB drug-induced hepatotoxicity in patients from Southern Brazil. *European Journal of Clinical Pharmacology* 2008;64:673-81.
16. Rana SV, Ola RP, Sharma SK, *et al.* Comparison between acetylator phenotype and genotype polymorphism of n-acetyltransferase-2 in tuberculosis patients. *Hepatology International* 2012;6:397-402.
17. Shimizu Y, Dobashi K, Mita Y, *et al.* DNA microarray genotyping of N-acetyltransferase 2 polymorphism using carbodiimide as the linker for assessment of isoniazid hepatotoxicity. *Tuberculosis* 2006;86:374-81.
18. Yuliwulandari R, Susilowati RW, Wicaksono BD, *et al.* NAT2 variants are associated with drug-induced liver injury caused by anti-tuberculosis drugs in Indonesian patients with tuberculosis. *J Hum Genet* 2016; doi:10.1038/jhg.2016.10.
19. Wattanapokayakit S, Mushiroda T, Yanai H, *et al.* NAT2 slow acetylator associated with anti-tuberculosis drug-induced liver injury in Thai patients. *Int J Tuberc Lung Dis* 2016;20:1364-9.
20. Chatterjee S, Lyle N, Mandal A, *et al.* GSTT1 and GSTM1 gene deletions are not associated with hepatotoxicity caused by antitubercular drugs. *Journal of Clinical Pharmacy and Therapeutics* 2010;35:465-70.
21. Gupta VH, Singh M, Amarapurkar DN, *et al.* Association of GST null genotypes with anti-tuberculosis drug induced hepatotoxicity in Western Indian population. *Annals of Hepatology* 2013;12:959-65.
22. Huang YS, Su WJ, Huang YH, *et al.* Genetic polymorphisms of manganese superoxide dismutase, NAD(P)H : quinone oxidoreductase, glutathione S-transferase M1 and T1, and the susceptibility to drug-induced liver injury. *Journal of Hepatology* 2007;47:128-34.
23. Kim SH, Kim SH, Yoon HJ, *et al.* GSTT1 and GSTM1 null mutations and adverse reactions induced by antituberculosis drugs in Koreans. *Tuberculosis* 2010;90:39-43.
24. Leiro V, Fernandez-Villar A, Valverde D, *et al.* Influence of glutathione S-transferase M1 and T1 homozygous null mutations on the risk of antituberculosis drug-induced hepatotoxicity in a Caucasian population. *Liver International* 2008;28:835-9.
25. Liu F, Jiao AX, Wu XR, *et al.* Impact of Glutathione S-Transferase M1 and T1 on Anti-Tuberculosis Drug-Induced Hepatotoxicity in Chinese Pediatric Patients. *Plos One* 2014;9.
26. Monteiro TP, El-Jaick KB, Jeovanio-Silva AL, *et al.* The roles of GSTM1 and GSTT1 null genotypes and other predictors in anti-tuberculosis drug-induced liver injury. *Journal of Clinical Pharmacy and Therapeutics* 2012;37:712-8.
27. Rana SV, Kamboj JK, Sharma SK, *et al.* Antioxidant status and GST gene polymorphisms in antitubercular treatment-induced hepatotoxicity patients. *Hepatol Int* 2013;7:876-82.
28. Roy B, Chowdhury A, Kundu S, *et al.* Increased risk of antituberculosis drug-induced hepatotoxicity in individuals with glutathione S-transferase M1 'null' mutation. *Journal of Gastroenterology and Hepatology* 2001;16:1033-7.
29. Chen R, Wang J, Tang S, *et al.* Association of polymorphisms in drug transporter genes (SLCO1B1 and SLC10A1) and anti-tuberculosis drug-induced hepatotoxicity in a Chinese cohort. *Tuberculosis*



- 2015;95:68-74.
30. Kim SH, Kim SH, Lee JH, *et al.* Polymorphisms in drug transporter genes (ABCB1, SLCO1B1 and ABCC2) and hepatitis induced by antituberculosis drugs. *Tuberculosis* 2012;92:100-4.
  31. Li LM, Chen L, Deng GH, *et al.* SLCO1B1\*15 haplotype is associated with rifampin-induced liver injury. *Molecular Medicine Reports* 2012;6:75-82.
  32. An HR, Wu XQ, Wang ZY, *et al.* NAT2 and CYP2E1 polymorphisms associated with antituberculosis drug-induced hepatotoxicity in Chinese patients. *Clinical and Experimental Pharmacology and Physiology* 2012;39:535-43.
  33. Bose PD, Sarma MP, Medhi S, *et al.* Role of polymorphic N-acetyl transferase2 and cytochrome P4502E1 gene in antituberculosis treatment-induced hepatitis. *Journal of Gastroenterology and Hepatology* 2011;26:312-8.
  34. Chamorro JG, Castagnino JP, Musella RM, *et al.* Sex, ethnicity, and slow acetylator profile are the major causes of hepatotoxicity induced by antituberculosis drugs. *Journal of Gastroenterology and Hepatology* 2013;28:323-8.
  35. Cho HJ, Koh WJ, Ryu YJ, *et al.* Genetic polymorphisms of NAT2 and CYP2E1 associated with antituberculosis drug-induced hepatotoxicity in Korean patients with pulmonary tuberculosis. *Tuberculosis* 2007;87:551-6.
  36. Gupta VH, Amarapurkar DN, Singh M, *et al.* Association of N-acetyltransferase 2 and cytochrome P450 2E1 gene polymorphisms with antituberculosis drug-induced hepatotoxicity in Western India. *Journal of Gastroenterology and Hepatology* 2013;28:1368-74.
  37. Huang YS, Chern HD, Su WJ, *et al.* Cytochrome p450 2E1 genotype and the susceptibility to antituberculosis drug-induced hepatitis. *Hepatology* 2003;37:924-30.
  38. Lee SW, Chung LS, Huang HH, *et al.* NAT2 and CYP2E1 polymorphisms and susceptibility to first-line anti-tuberculosis drug-induced hepatitis. *Int J Tuberc Lung Dis* 2010;14:622-6.
  39. Mishra S, Daschakraborty S, Shukla P, *et al.* N-acetyltransferase and cytochrome P450 2E1 gene polymorphisms and susceptibility to antituberculosis drug hepatotoxicity in an Indian population. *National Medical Journal of India* 2013;26:260-5.
  40. Santos NP, Callegari-Jacques SM, Ribeiro Dos Santos AK, *et al.* N-acetyl transferase 2 and cytochrome P450 2E1 genes and isoniazid-induced hepatotoxicity in Brazilian patients. *Int J Tuberc Lung Dis* 2013;17:499-504.
  41. Vuilleumier N, Rossier MF, Chiappe A, *et al.* CYP2E1 genotype and isoniazid-induced hepatotoxicity in patients treated for latent tuberculosis. *Eur J Clin Pharmacol* 2006;62:423-9.
  42. Yamada S, Tang M, Richardson K, *et al.* Genetic variations of NAT2 and CYP2E1 and isoniazid hepatotoxicity in a diverse population. *Pharmacogenomics* 2009;10:1433-45.
  43. Zaverucha-do-Valle C, Monteiro SP, El-Jaick KB, *et al.* The role of cigarette smoking and liver enzymes polymorphisms in anti-tuberculosis drug-induced hepatotoxicity in Brazilian patients. *Tuberculosis (Edinb)* 2014;94:299-305.
  44. Sharma SK, Jha BK, Sharma A, *et al.* Genetic polymorphisms of CYP2E1 and GSTM1 loci and susceptibility to anti-tuberculosis drug-induced hepatotoxicity. *International Journal of Tuberculosis and Lung Disease* 2014;18:588-93.

45. Wang T, Yu HT, Wang W, *et al.* Genetic Polymorphisms of Cytochrome P450 and Glutathione S-transferase Associated with Antituberculosis Drug-induced Hepatotoxicity in Chinese Tuberculosis Patients. *Journal of International Medical Research* 2010;38:977-86.
46. Tang SW, Lv XZ, Zhang Y, *et al.* CYP2E1, GSTM1 and GSTT1 genetic polymorphisms and susceptibility to antituberculosis drug-induced hepatotoxicity: a nested case-control study. *Journal of Clinical Pharmacy and Therapeutics* 2012;37:588-93.
47. Yimer G, Ueda N, Habtewold A, *et al.* Pharmacogenetic & pharmacokinetic biomarker for efavirenz based ARV and rifampicin based anti-TB drug induced liver injury in TB-HIV infected patients. *PLoS One* 2011;6:e27810.
48. Brito TC, Possuelo LG, Valim ARM, *et al.* Polymorphisms in CYP2E1, GSTM1 and GSTT1 and anti-tuberculosis drug-induced hepatotoxicity. *Anais Da Academia Brasileira De Ciencias* 2014;86:855-65.
49. Forestiero FJ, Cecon L, Hirata MH, *et al.* Relationship of NAT2, CYP2E1 and GSTM1/GSTT1 polymorphisms with mild elevation of liver enzymes in Brazilian individuals under anti-tuberculosis drug therapy. *Clinica Chimica Acta* 2013;415:215-9.
50. Rana SV, Sharma SK, Ola RP, *et al.* N-acetyltransferase 2, cytochrome P4502E1 and glutathione S-transferase genotypes in antitubercular treatment-induced hepatotoxicity in North Indians. *J Clin Pharm Ther* 2014;39:91-6.
51. Singla N, Gupta D, Birbian N, *et al.* Association of NAT2, GST and CYP2E1 polymorphisms and anti-tuberculosis drug-induced hepatotoxicity. *Tuberculosis* 2014;94:293-8.
52. Sotsuka T, Sasaki Y, Hirai S, *et al.* Association of Isoniazid-metabolizing Enzyme Genotypes and Isoniazid-induced Hepatotoxicity in Tuberculosis Patients. *In Vivo* 2011;25:803-12.
53. Teixeira RL, Morato RG, Cabello PH, *et al.* Genetic polymorphisms of NAT2, CYP2E1 and GST enzymes and the occurrence of antituberculosis drug-induced hepatitis in Brazilian TB patients. *Mem Inst Oswaldo Cruz* 2011;106:716-24.
54. Xiang Y, Ma L, Wu WD, *et al.* The Incidence of Liver Injury in Uyghur Patients Treated for TB in Xinjiang Uyghur Autonomous Region, China, and Its Association with Hepatic Enzyme Polymorphisms NAT2, CYP2E1, GSTM1 and GSTT1. *Plos One* 2014;9.
